# Supplementary material for: Whole Transcriptome Analysis Reveals Heterogeneity in B Cell Memory Populations in Patients With Juvenile Idiopathic Arthritis-Associated Uveitis
Source: Front Immunol. 2020 Sep 17;11:2170. doi: 10.3389/fimmu.2020.02170 (PMC7527539; doi:10.3389/fimmu.2020.02170)
Supplement: Supplementary file 4 [file Data_Sheet_1.xlsx]

## Sheet: Supplementary table 1
Supplementary Table 1. Antibody panel used for sorting peripheral blood lymphocytes (CD14-CD3+CD19+)
Marker	Fluorochrome	Dilution	Company
CD3	AF700	01:25:00	BioLegend
CD19	AF700	01:50:00	BD
CD4	BV711	01:50:00	Sony Biotechnology
CD8	V500	01:50:00	BD
CD14	PerCP-Cy5.5	1:100	eBioscience

## Sheet: Supplementary table 2
Supplementary Table 2. Antibody panel used for sorting CD45+CD3-CD19+
Marker	Fluorochrome	Dilution	Company
CD3	APC	1:100	BioLegend
CD19	BV605	01:50:00	BD
CD4	BV711	01:00:00	Sony Biotechnology
CD8	V500	01:25:00	BD
CD45	PerCP	1:100	Sony Biotechnology

## Sheet: Supplementary table 3
Supplementary table 3. List of 17 marker genes previously associated with individual B cell subsets in peripheral blood mononuclear cells
IGHA1
IGHA2
IGHG1
IGHG2
IGHG4
IGHM
IGHD
CD99
NR4A1
CCR7
CD38
BCL6
CD19
CD24
MS4A1
CD1C
CD27

## Sheet: Supplementary table 4 
Supplementary Table 4. Differentially expressed genes (614) between healthy controls, JIA patients without uveitis and JIA patients with uveitis
Ensemble Gene ID	baseMean	log2FoldChange	lfcSE	stat	pvalue	padj	ensembl_transcript_id	hgnc_symbol	chromosome_name	entrezgene	ucsc	external_gene_name	gene_biotype	start_position	end_position	percentage_gc_content
ENSG00000265972	123299	-1.16418	0.214346	34.7035	2.91228e-08	9.49696e-05	ENST00000582401	TXNIP	1	10628	uc031utr.1	TXNIP	protein_coding	145992435	145996600	42.49
ENSG00000112576	6342.93	-1.42136	0.304444	28.5019	6.46967e-07	0.00105488	ENST00000372991	CCND3	6	896	uc003orn.4	CCND3	protein_coding	41934933	42050357	47.06
ENSG00000229914	32.0585	0.012164	4.01157	21.752	1.89069e-05	NA	ENST00000439139		1	NA		RP11-404O13.4	processed_pseudogene	158195633	158196131	53.31
ENSG00000169184	5.66701	-7.9843	2.4526	21.6275	2.01214e-05	NA	ENST00000302326	MN1	22	4330	uc003adj.3	MN1	protein_coding	27748277	27801498	52.09
ENSG00000114391	12289	-0.506617	0.125129	21.0584	2.67438e-05	0.0239402	ENST00000464595	RPL24	3	6152		RPL24	protein_coding	101681091	101686782	42.52
ENSG00000164938	12890.3	-1.05904	0.251188	20.836	2.98889e-05	0.0239402	ENST00000448464	TP53INP1	8	94241	uc003yhh.3	TP53INP1	protein_coding	94925972	94949411	42.53
ENSG00000119729	3563.28	1.03223	0.211472	20.4251	3.67068e-05	0.0239402	ENST00000465198	RHOQ	2	23433		RHOQ	protein_coding	46541806	46583121	44.36
ENSG00000089157	39141.2	-0.51972	0.12279	19.7992	5.01945e-05	0.0272807	ENST00000392514	RPLP0	12	6175	uc001txq.3	RPLP0	protein_coding	120196686	120201235	48.92
ENSG00000235688	43.6419	-6.00122	2.89769	19.7885	5.04628e-05	NA	ENST00000456949		2	NA		AC116614.1	antisense	949634	950274	57.57
ENSG00000158856	6.4999	-7.84104	2.43563	19.2294	6.67407e-05	NA	ENST00000522148	DMTN	8	2039		DMTN	protein_coding	22048995	22082527	54.92
ENSG00000253209	29.4492	4.42512	1.63705	18.9628	7.62582e-05	NA	ENST00000523210	IGHV3-65	14	NA		IGHV3-65	IG_V_pseudogene	106666092	106666532	49.89
ENSG00000280985	4.73028	-7.26953	2.36893	18.9404	7.71147e-05	NA	ENST00000630363		17	NA		AC217773.1	miRNA	46172089	46172239	62.25
ENSG00000253159	27.5509	-1.47532	2.80205	18.5901	9.18759e-05	NA	ENST00000613314	PCDHGA12	5	26025	uc011dba.2	PCDHGA12	protein_coding	141430589	141512979	45.55
ENSG00000234369	61.984	0.731369	1.51518	18.4095	0.000100562	NA	ENST00000414123	TATDN1P1	10	NA		TATDN1P1	processed_pseudogene	63222155	63223045	35.8
ENSG00000158301	50.3129	-8.67237	2.95656	17.7913	0.000136983	NA	ENST00000332262	GPRASP2	X	114928	uc004ejm.3	GPRASP2	protein_coding	102712176	102717733	51.49
ENSG00000112280	28.1598	-8.55082	2.37463	17.3509	0.000170724	NA	ENST00000357250	COL9A1	6	1297	uc003pfg.4	COL9A1	protein_coding	70215061	70303083	37.98
ENSG00000015171	3122.21	0.217794	0.257733	17.0609	0.000197367	0.0785756	ENST00000439456	ZMYND11	10	10771		ZMYND11	protein_coding	134465	254637	37.8
ENSG00000213024	3357.39	-0.65291	0.230599	17.001	0.000203363	0.0785756	ENST00000422090	NUP62	19	23636	uc002pqz.4	NUP62	protein_coding	49906825	49929763	54.29
ENSG00000100316	104103	-0.461308	0.117068	16.8725	0.00021686	0.0785756	ENST00000401609	RPL3	22	6122	uc003axi.3	RPL3	protein_coding	39312882	39320389	53.41
ENSG00000118307	32.0474	6.88659	2.69669	16.3435	0.000282525	NA	ENST00000556006	CASC1	12	55259	uc001rgl.3	CASC1	protein_coding	25108420	25195162	38.2
ENSG00000267534	8.36826	-9.2641	3.24456	16.2802	0.000291609	NA	ENST00000590320	S1PR2	19	9294	uc002mnl.2	S1PR2	protein_coding	10221435	10231272	56.78
ENSG00000084070	21918.9	-0.837888	0.227534	16.2008	0.000303412	0.0952265	ENST00000435168	SMAP2	1	64744		SMAP2	protein_coding	40344850	40423326	41.95
ENSG00000117601	18.2149	1.04265	4.08492	16.15	0.000311224	NA	ENST00000367698	SERPINC1	1	462	uc001gjt.3	SERPINC1	protein_coding	173903804	173917378	46.31
ENSG00000149557	10.0574	-9.40756	3.63923	16.1076	0.000317892	NA	ENST00000526507	FEZ1	11	9638		FEZ1	protein_coding	125445745	125496317	43.19
ENSG00000162511	65729.5	-0.394482	0.104128	16.0868	0.000321218	0.0952265	ENST00000294507	LAPTM5	1	7805	uc001bsc.2	LAPTM5	protein_coding	30732469	30757820	52.62
ENSG00000155066	34.7131	-8.85093	2.51906	15.7318	0.000383607	NA	ENST00000403131	PROM2	2	150696	uc002suk.3	PROM2	protein_coding	95274453	95291308	58.88
ENSG00000249244	7.39134	-9.97004	3.77063	15.701	0.000389559	NA	ENST00000505994		4	NA		RP11-548H18.2	unprocessed_pseudogene	119391831	119395335	39.46
ENSG00000168209	1019.16	-1.88214	0.555229	15.6553	0.000398565	NA	ENST00000307365	DDIT4	10	54541	uc001jsx.1	DDIT4	protein_coding	72273920	72276036	58.72
ENSG00000244021	10.2256	-1.96297	0.599388	15.5331	0.000423664	NA	ENST00000491435		4	NA		RP11-50D9.1	processed_pseudogene	127812720	127813200	43.87
ENSG00000280353	34.0149	0.778894	2.74199	15.4688	0.000437524	NA	ENST00000623064		19	NA		CTC-453G23.7	TEC	48198107	48199720	48.08
ENSG00000142534	115590	-0.533606	0.141241	15.449	0.000441876	0.12008	ENST00000600027	RPS11	19	6205		RPS11	protein_coding	49496365	49499689	53.05
ENSG00000186280	11.6554	-11.2513	3.1528	15.4091	0.000450776	NA	ENST00000335080	KDM4D	11	55693	uc001pfe.3	KDM4D	protein_coding	94973681	94999518	36.3
ENSG00000124767	2715.95	-0.940188	0.259298	15.2718	0.000482809	0.121111	ENST00000373365	GLO1	6	2739	uc003ooc.3	GLO1	protein_coding	38675925	38703141	39.8
ENSG00000106686	22.0978	-10.9403	3.16407	15.192	0.000502468	NA	ENST00000485616	SPATA6L	9	55064		SPATA6L	protein_coding	4553386	4666674	41.45
ENSG00000197629	18568.8	0.772448	0.202298	14.8408	0.000598905	0.139502	ENST00000361050	MPEG1	11	219972	uc001nnu.4	MPEG1	protein_coding	59208510	59212951	46.92
ENSG00000214203	24.994	-1.60483	1.33748	14.796	0.000612485	NA	ENST00000482189	RPS4XP1	12	NA		RPS4XP1	processed_pseudogene	100009052	100009838	45.62
ENSG00000171160	19.1465	1.84337	4.07591	14.6233	0.000667716	NA	ENST00000307450	MORN4	10	118812	uc001kob.4	MORN4	protein_coding	97614553	97633500	46.51
ENSG00000067560	17094.9	-0.289517	0.1106	14.61	0.000672174	0.13979	ENST00000418115	RHOA	3	387	uc003cwu.3	RHOA	protein_coding	49359145	49412998	46.57
ENSG00000143297	14745.9	1.31734	0.426179	14.5696	0.000685875	0.13979	ENST00000462218	FCRL5	1	83416		FCRL5	protein_coding	157513377	157552520	42.97
ENSG00000280832	18.1576	0.012133	4.40939	14.3331	0.000771965	NA	ENST00000629441	ST3GAL4-AS1	11	NA	uc001qdq.4	ST3GAL4-AS1	antisense	126340889	126355587	50.38
ENSG00000133789	20567.9	0.468538	0.123537	13.8598	0.000978116	0.187626	ENST00000447399	SWAP70	11	23075	uc001mhx.3	SWAP70	protein_coding	9664077	9752991	39.97
ENSG00000219102	43.1248	-3.45368	2.16172	13.7428	0.00103702	NA	ENST00000437410	HNRNPA3P12	1	NA		HNRNPA3P12	processed_pseudogene	53974969	53976031	43.65
ENSG00000264660	26.5039	2.03899	4.20061	13.6028	0.00111223	NA	ENST00000581673		17	NA		RP11-381P6.1	antisense	20963722	20980238	44.81
ENSG00000181085	11.89	2.10014	3.96647	13.5619	0.00113521	NA	ENST00000338033	MAPK15	8	225689	uc003yzj.3	MAPK15	protein_coding	143716259	143722458	65.08
ENSG00000172183	8426.18	-0.884872	0.275219	13.5513	0.0011412	0.206748	ENST00000560741	ISG20	15	3669	uc002bmv.1	ISG20	protein_coding	88636153	88656483	52.19
ENSG00000211648	2751.84	-0.0683661	0.81576	13.3928	0.00123537	0.212029	ENST00000390294	IGLV1-47	22	NA		IGLV1-47	IG_V_gene	22357739	22358260	57.66
ENSG00000164099	36.3136	-2.46454	3.71839	13.3568	0.00125779	NA	ENST00000296498	PRSS12	4	8492	uc003ica.2	PRSS12	protein_coding	118280038	118353003	36.51
ENSG00000255725	17.8391	-2.88947	1.33269	13.3306	0.00127436	NA	ENST00000543961	TDGP1	12	NA		TDGP1	processed_pseudogene	25803298	25804526	41.99
ENSG00000261612	9.68231	-3.61165	1.49693	13.2216	0.00134575	NA	ENST00000564581	SUB1P3	16	NA		SUB1P3	processed_pseudogene	4562814	4563128	40
ENSG00000183598	48.7365	-13.455	4.66117	13.2099	0.00135368	NA	ENST00000331491	HIST2H3D	1	653604	uc010pbl.2	HIST2H3D	protein_coding	149813271	149813681	67.4
ENSG00000115020	9371.78	0.702277	0.208933	13.1393	0.00140226	0.224251	ENST00000392202	PIKFYVE	2	200576	uc002vcv.3	PIKFYVE	protein_coding	208266267	208358751	37.08
ENSG00000151117	14.8225	1.04263	4.26276	13.0593	0.0014595	NA	ENST00000527002	TMEM86A	11	144110		TMEM86A	protein_coding	18693122	18704785	51.95
ENSG00000065809	12389.2	0.579586	0.168023	13.015	0.00149221	0.224251	ENST00000378470	FAM107B	10	83641	uc001imx.2	FAM107B	protein_coding	14518557	14774897	43.19
ENSG00000114439	5791.76	0.227236	0.167037	12.9875	0.00151289	0.224251	ENST00000415149	BBX	3	56987	uc003dwk.5	BBX	protein_coding	107522936	107811324	36.95
ENSG00000184445	1794.46	1.01547	0.357695	12.9618	0.00153244	NA	ENST00000535410	KNTC1	12	9735		KNTC1	protein_coding	122527246	122626396	41.24
ENSG00000166295	8970.15	-0.509264	0.180334	12.8669	0.00160689	0.227829	ENST00000478193	ANAPC16	10	119504	uc021psq.1	ANAPC16	protein_coding	72216000	72235860	43.46
ENSG00000144118	2648.84	0.399922	0.305952	12.6866	0.0017585	0.238936	ENST00000447591	RALB	2	5899	uc010yys.2	RALB	protein_coding	120240064	120294713	46.37
ENSG00000253047	29.8105	11.6686	4.48626	12.6057	0.0018311	NA	ENST00000517238		1	NA		SNORA40	snoRNA	150600539	150600659	35.54
ENSG00000057252	1029.48	-0.226434	0.37339	12.5562	0.00187699	NA	ENST00000367619	SOAT1	1	6646	uc001gml.3	SOAT1	protein_coding	179293714	179358680	39.63
ENSG00000251495	47.2087	0.95973	1.31557	12.4294	0.00199982	NA	ENST00000510729	PPIAP11	5	NA		PPIAP11	processed_pseudogene	82009602	82010094	48.68
ENSG00000111913	37076.9	0.419703	0.123953	12.4044	0.00202501	0.264143	ENST00000562221	FAM65B	6	9750		FAM65B	protein_coding	24797373	25042168	41.74
ENSG00000083857	22.1089	5.53433	2.4356	12.402	0.00202743	NA	ENST00000441802	FAT1	4	2195	uc003izf.3	FAT1	protein_coding	186587783	186726722	41.53
ENSG00000168214	1789.99	0.891421	0.242986	12.3416	0.00208959	NA	ENST00000512351	RBPJ	4	3516		RBPJ	protein_coding	26163455	26435131	40.79
ENSG00000218418	7.70999	5.62673	2.19053	12.2712	0.00216444	NA	ENST00000401578		6	NA		RP11-296E7.1	processed_pseudogene	80064286	80070199	44.37
ENSG00000149273	85665.6	-0.424879	0.13371	12.2083	0.00223359	0.280144	ENST00000531188	RPS3	11	6188	uc001owh.4	RPS3	protein_coding	75399486	75422280	48.52
ENSG00000175514	33.1931	-0.225809	2.68069	12.2033	0.00223921	NA	ENST00000312457	GPR152	11	390212	uc001olm.3	GPR152	protein_coding	67451301	67452729	65.78
ENSG00000196628	13225.2	0.530599	0.172294	12.0834	0.00237754	0.287154	ENST00000356073	TCF4	18	6925	uc002lfz.2	TCF4	protein_coding	55222331	55664787	37.78
ENSG00000259479	10.7668	1.95629	2.61862	12.0813	0.00238005	NA	ENST00000562107	SORD2P	15	NA		SORD2P	transcribed_unprocessed_pseudogene	44826371	44884694	44.78
ENSG00000111837	16.4033	4.47521	3.73611	12.0009	0.0024777	NA	ENST00000313243	MAK	6	4117	uc003mzm.3	MAK	protein_coding	10762723	10838555	42.11
ENSG00000230592	9.78006	1.49465	1.9645	11.984	0.00249872	NA	ENST00000429844	RPSAP8	X	NA		RPSAP8	processed_pseudogene	100155885	100156773	52.31
ENSG00000204628	58951.7	-0.358797	0.10758	11.9171	0.00258366	0.300904	ENST00000511473	GNB2L1	5	10399		GNB2L1	protein_coding	181236909	181248096	52.35
ENSG00000234176	7.37194	0.244661	1.8159	11.9038	0.00260094	NA	ENST00000425843	HSPA8P1	X	NA		HSPA8P1	processed_pseudogene	121203182	121205014	44.08
ENSG00000270264	10.6872	0.0121283	4.56768	11.6644	0.00293165	NA	ENST00000605113	NDUFB8P2	17	NA		NDUFB8P2	processed_pseudogene	59885015	59885552	53.9
ENSG00000116191	33558.2	0.379776	0.119237	11.6447	0.00296057	0.323761	ENST00000495034	RALGPS2	1	55103		RALGPS2	protein_coding	178725147	178921841	36.82
ENSG00000133835	3563.43	-0.931708	0.330212	11.6327	0.00297848	0.323761	ENST00000256216	HSD17B4	5	3295	uc003ksj.3	HSD17B4	protein_coding	119452443	119637199	37.34
ENSG00000261812	9.37941	-1.04923	3.38695	11.6226	0.0029936	NA	ENST00000564451	TUBB8P7	16	NA		TUBB8P7	polymorphic_pseudogene	90093154	90096354	56.61
ENSG00000173156	19.3645	-9.21826	3.0176	11.5387	0.00312176	NA	ENST00000308831	RHOD	11	29984	uc001ojv.3	RHOD	protein_coding	67056818	67072013	55.63
ENSG00000162747	4.98003	-5.94753	2.50975	11.5361	0.00312577	NA	ENST00000367964	FCGR3B	1	2215	uc021pdo.1	FCGR3B	protein_coding	161623196	161631963	44.5
ENSG00000258613	86.0556	2.75565	1.76466	11.5359	0.00312617	NA	ENST00000557463	RPL21P7	14	NA		RPL21P7	processed_pseudogene	65266638	65267690	44.92
ENSG00000255224	22.2177	5.77261	3.13986	11.5105	0.00316607	NA	ENST00000524499		8	NA		CTD-3065J16.9	antisense	144078002	144079265	62.9
ENSG00000130545	21.2453	6.044	3.17211	11.4868	0.0032038	NA	ENST00000598494	CRB3	19	92359	uc002mey.3	CRB3	protein_coding	6463777	6467221	59.94
ENSG00000162980	2733.41	1.03582	0.307786	11.4383	0.00328253	0.345301	ENST00000495604	ARL5A	2	26225		ARL5A	protein_coding	151788984	151828492	37.35
ENSG00000159208	19.2387	7.1048	3.68632	11.3774	0.00338395	NA	ENST00000447007	CIART	1	148523	uc001eui.3	CIART	protein_coding	150282543	150287093	47.53
ENSG00000198743	1513.46	1.73123	0.465101	11.3367	0.00345364	NA	ENST00000381151	SLC5A3	21	6526	uc002yto.3	SLC5A3	protein_coding	34073570	34106260	39.03
ENSG00000231128	29.3064	-8.03148	4.78228	11.2178	0.00366514	NA	ENST00000429398		1	NA		RP5-1073O3.2	antisense	113812379	113829171	38.96
ENSG00000227077	98.3937	1.02008	0.915216	11.1552	0.00378158	NA	ENST00000442562		17	NA	uc032ewx.1	AC107983.4	processed_pseudogene	18572752	18572961	62.38
ENSG00000240563	44.8966	-5.83039	2.79188	11.1438	0.00380328	NA	ENST00000498273	L1TD1	1	54596	uc001dae.5	L1TD1	protein_coding	62194831	62212328	43.27
ENSG00000185946	2348.28	1.0784	0.357453	11.0786	0.00392932	NA	ENST00000524631	RNPC3	1	55599	uc010oum.1	RNPC3	protein_coding	103525691	103555239	35.03
ENSG00000126822	10.2801	-8.28006	2.83651	11.0536	0.00397867	NA	ENST00000555982	PLEKHG3	14	26030		PLEKHG3	protein_coding	64704102	64750247	52.94
ENSG00000213280	23.5622	-1.13049	0.844141	11.02	0.00404607	NA	ENST00000393266		7	NA		RP11-212P7.1	processed_pseudogene	128570241	128570688	52.9
ENSG00000013275	2111.78	-0.790607	0.287752	11.0032	0.0040803	NA	ENST00000157812	PSMC4	19	5704	uc002omq.4	PSMC4	protein_coding	39971005	39981441	50.25
ENSG00000091262	19.6178	-0.91028	2.09993	10.9941	0.00409888	NA	ENST00000205557	ABCC6	16	368	uc002den.4	ABCC6	protein_coding	16148928	16223522	49.86
ENSG00000011009	1572.39	-0.812371	0.34346	10.9522	0.00418562	NA	ENST00000374514	LYPLA2	1	11313	uc001bht.3	LYPLA2	protein_coding	23790970	23795539	62.39
ENSG00000155657	2971.57	1.07757	0.326185	10.9441	0.00420258	0.425109	ENST00000342992	TTN	2	7273	uc021vsy.3	TTN	protein_coding	178525989	178830802	37.71
ENSG00000182180	1655.98	0.184487	0.281094	10.9213	0.00425089	NA	ENST00000479005	MRPS16	10	51021	uc001jtt.1	MRPS16	protein_coding	73248843	73252693	47.47
ENSG00000164344	73.503	22.6528	4.31016	10.8902	0.00431747	NA	ENST00000511608	KLKB1	4	3818	uc003iyy.3	KLKB1	protein_coding	186208979	186258471	40.19
ENSG00000066294	2749.24	0.719536	0.24418	10.8684	0.0043648	0.425109	ENST00000368054	CD84	1	8832	uc001fwf.4	CD84	protein_coding	160541095	160579516	41.6
ENSG00000147403	62495.3	-0.407765	0.128613	10.8377	0.00443229	0.425109	ENST00000492572	RPL10	X	6134		RPL10	protein_coding	154389955	154409168	54.28
ENSG00000167103	135.021	1.62634	2.41773	10.8272	0.00445553	NA	ENST00000388747	PIP5KL1	9	138429	uc011mao.2	PIP5KL1	protein_coding	127920879	127930797	57.03
ENSG00000277363	8.11098	5.89043	2.78402	10.8146	0.00448381	NA	ENST00000617146	SRCIN1	17	80725	uc002hqd.3	SRCIN1	protein_coding	38530016	38605930	56.68
ENSG00000080546	2328.38	-2.02739	0.727696	10.791	0.00453692	NA	ENST00000436639	SESN1	6	27244	uc003psu.3	SESN1	protein_coding	108986437	109094819	37.66
ENSG00000203760	9.45633	1.04263	4.39718	10.7876	0.0045447	NA	ENST00000368326	CENPW	6	387103	uc032xlg.1	CENPW	protein_coding	126340174	126348875	35.46
ENSG00000183092	198.819	12.3108	3.18542	10.7793	0.00456364	NA	ENST00000355173	BEGAIN	14	57596	uc001yhq.3	BEGAIN	protein_coding	100537149	100587413	60.97
ENSG00000159648	24.3202	7.52887	3.46005	10.7711	0.00458228	NA	ENST00000290871	TEPP	16	374739	uc002emv.4	TEPP	protein_coding	57976435	57988116	50.91
ENSG00000163349	2865.5	0.886405	0.265534	10.7685	0.00458837	0.427505	ENST00000426820	HIPK1	1	204851	uc001eem.3	HIPK1	protein_coding	113929192	113977869	39.82
ENSG00000105856	2368.46	0.35773	0.234236	10.7674	0.00459087	NA	ENST00000468410	HBP1	7	26959	uc011klv.2	HBP1	protein_coding	107168961	107202529	37.95
ENSG00000171812	20.3453	6.75596	3.07632	10.7419	0.00464961	NA	ENST00000303143	COL8A2	1	1296	uc001bzv.3	COL8A2	protein_coding	36095236	36125220	55.63
ENSG00000119285	1953.88	0.818389	0.367643	10.7288	0.00468025	NA	ENST00000366582	HEATR1	1	55127	uc001hyd.2	HEATR1	protein_coding	236549005	236604504	38.51
ENSG00000236104	2005.41	-0.589464	0.26825	10.6727	0.00481352	NA	ENST00000431845	ZBTB22	6	9278	uc003oeb.3	ZBTB22	protein_coding	33314406	33317942	59.46
ENSG00000168028	30397.2	-0.428457	0.136124	10.6238	0.00493252	0.431552	ENST00000301821	RPSA	3	3921	uc003cjp.3	RPSA	protein_coding	39406689	39412542	45.15
ENSG00000147140	11004.1	-0.375967	0.136988	10.558	0.00509758	0.431552	ENST00000276079	NONO	X	4841	uc004dzn.4	NONO	protein_coding	71283192	71301168	44.11
ENSG00000255318	39.2821	-8.66401	3.67316	10.5434	0.00513487	NA	ENST00000533311		11	NA		RP11-655M14.13	lincRNA	67618279	67627304	50.34
ENSG00000135048	4504.63	-0.227336	0.255095	10.5424	0.00513747	0.431552	ENST00000377044	TMEM2	9	23670	uc011lsa.1	TMEM2	protein_coding	71683366	71816690	40.46
ENSG00000141258	6690.73	0.207459	0.231586	10.5332	0.00516116	0.431552	ENST00000572875	SGSM2	17	9905		SGSM2	protein_coding	2337498	2381058	54.99
ENSG00000203799	26.3328	12.4793	4.56782	10.5275	0.00517598	NA	ENST00000615766	CCDC162P	6	221262		CCDC162P	unitary_pseudogene	109285485	109355063	44.64
ENSG00000231584	127.111	11.319	3.20729	10.5185	0.00519913	NA	ENST00000467292	FAHD2CP	2	NA	uc010fht.3	FAHD2CP	transcribed_unprocessed_pseudogene	96010551	96023380	49.42
ENSG00000158865	56.2408	1.34857	2.30913	10.4834	0.00529117	NA	ENST00000347898	SLC5A11	16	115584	uc002dmu.4	SLC5A11	protein_coding	24845841	24911628	45.54
ENSG00000197558	10.3405	0.540118	1.54734	10.4106	0.00548752	NA	ENST00000623373	SSPO	7	23145		SSPO	protein_coding	149776042	149833979	61.01
ENSG00000213442	47495.6	-0.426582	0.136925	10.4093	0.00549107	0.44651	ENST00000462885	RPL18AP3	12	NA		RPL18AP3	processed_pseudogene	104265309	104265836	60.23
ENSG00000162733	4.65662	-2.96498	3.78231	10.3947	0.00553115	NA	ENST00000446985	DDR2	1	4921		DDR2	protein_coding	162631373	162787400	40.47
ENSG00000086570	7.88673	4.54593	2.42561	10.3753	0.00558506	NA	ENST00000520200	FAT2	5	2196	uc003lud.4	FAT2	protein_coding	151504093	151568944	46.35
ENSG00000281849	10.47	-11.5082	5.09132	10.3557	0.00564001	NA	ENST00000627721		X	NA		RP13-465B17.4	antisense	386980	405579	50.68
ENSG00000169508	3704.41	1.23874	0.365485	10.3514	0.00565215	0.44651	ENST00000376414	GPR183	13	1880	uc001vog.3	GPR183	protein_coding	99294530	99307405	38.06
ENSG00000183022	77.9943	0.0342795	1.26633	10.3466	0.00566573	NA	ENST00000330554	TPM3P8	2	NA		TPM3P8	processed_pseudogene	230573167	230573809	47.9
ENSG00000087903	103.128	11.4573	3.14272	10.3414	0.00568048	NA	ENST00000303657	RFX2	19	5990	uc002meb.3	RFX2	protein_coding	5993164	6199572	47.54
ENSG00000188906	3706.3	0.822832	0.335807	10.3168	0.00575082	0.44651	ENST00000416796	LRRK2	12	120892		LRRK2	protein_coding	40196744	40369285	35.24
ENSG00000140525	489.215	1.56747	0.434934	10.3092	0.00577288	NA	ENST00000300027	FANCI	15	55215	uc002bnm.1	FANCI	protein_coding	89243949	89317261	40.11
ENSG00000228050	33.5414	5.10636	2.07216	10.2547	0.00593214	NA	ENST00000420768	TOP3BP1	22	NA		TOP3BP1	processed_pseudogene	22223187	22224566	63.19
ENSG00000131747	40.7308	8.03701	2.3751	10.2453	0.00596019	NA	ENST00000423485	TOP2A	17	7153	uc002huq.3	TOP2A	protein_coding	40388516	40417950	39.83
ENSG00000101367	3606.43	-0.147914	0.283821	10.2425	0.00596857	0.45264	ENST00000375571	MAPRE1	20	22919	uc002wyh.3	MAPRE1	protein_coding	32819893	32850405	44.44
ENSG00000160282	26.1719	0.535801	3.02142	10.1756	0.00617173	NA	ENST00000483568	FTCD	21	10841	uc002zie.3	FTCD	protein_coding	46136262	46155567	58.97
ENSG00000167601	3.37068	-6.45422	2.93449	10.1674	0.00619697	NA	ENST00000301178	AXL	19	558	uc010ehj.4	AXL	protein_coding	41219203	41261766	50.86
ENSG00000106538	8.60882	9.01622	4.33014	10.1535	0.00624013	NA	ENST00000478771	RARRES2	7	5919		RARRES2	protein_coding	150338317	150341674	62.42
ENSG00000164855	42.3954	-2.11961	2.24169	10.1083	0.00638266	NA	ENST00000297477	TMEM184A	7	202915	uc003skv.4	TMEM184A	protein_coding	1542235	1560821	62.84
ENSG00000134962	8.7785	-8.26089	2.9956	10.0912	0.00643763	NA	ENST00000257408	KLB	4	152831	uc003gua.3	KLB	protein_coding	39406853	39451536	42.11
ENSG00000038274	6110.97	-0.12222	0.208309	10.0807	0.00647137	0.476548	ENST00000280969	MAT2B	5	27430	uc003lzj.4	MAT2B	protein_coding	163503114	163519336	38.25
ENSG00000267784	36.6719	11.6017	4.89118	10.0489	0.00657514	NA	ENST00000590024		2	NA		RP11-171I2.1	antisense	178723457	178727046	36.77
ENSG00000164949	26.8809	-2.022	4.1982	10.0409	0.00660141	NA	ENST00000396194	GEM	8	2669	uc003ygi.3	GEM	protein_coding	94249253	94262350	44.2
ENSG00000262370	8.77073	-11.2527	5.09145	10.039	0.00660789	NA	ENST00000577123		16	NA	uc032dox.1	RP11-473M20.9	lincRNA	3076911	3087100	47.75
ENSG00000237307	4.46648	-5.52781	2.25007	10.0307	0.00663537	NA	ENST00000426911	SRRM1P3	X	NA		SRRM1P3	processed_pseudogene	136976417	136985705	43.63
ENSG00000063177	48647.2	-0.367199	0.121226	10.0027	0.00672872	0.476548	ENST00000552347	RPL18	19	6141		RPL18	protein_coding	48615328	48619536	56.83
ENSG00000244617	59.5706	1.38417	3.13298	9.99229	0.00676397	NA	ENST00000320256	ASPRV1	2	151516	uc002sfz.5	ASPRV1	protein_coding	69960089	69962265	55.49
ENSG00000136156	9380.47	-0.369614	0.203053	9.95151	0.00690331	0.476548	ENST00000378565	ITM2B	13	9445	uc001vbz.3	ITM2B	protein_coding	48233158	48270357	37.31
ENSG00000272386	32.2088	-6.24616	2.9977	9.90181	0.007077	NA	ENST00000607478		17	NA		RP11-666A8.12	sense_intronic	76551352	76551750	38.35
ENSG00000172116	18.9496	-3.41596	2.98924	9.87567	0.00717012	NA	ENST00000393759	CD8B	2	926	uc002srx.3	CD8B	protein_coding	86815339	86861924	46.84
ENSG00000155962	15.1271	-8.69974	3.10339	9.87071	0.00718792	NA	ENST00000369449	CLIC2	X	1193	uc004fnf.4	CLIC2	protein_coding	155276211	155334657	38.46
ENSG00000107521	6581.84	-0.416537	0.142228	9.85488	0.00724502	0.476548	ENST00000361490	HPS1	10	3257	uc021pwv.1	HPS1	protein_coding	98416198	98446947	49.72
ENSG00000225447	19.8817	2.3848	3.4293	9.84377	0.0072854	NA	ENST00000432472	RPS15AP10	1	NA	uc010olu.2	RPS15AP10	processed_pseudogene	45645816	45646197	43.19
ENSG00000146757	3203.67	0.520318	0.216744	9.8414	0.00729401	0.476548	ENST00000328747	ZNF92	7	168374	uc003ttz.4	ZNF92	protein_coding	65373799	65401135	39.16
ENSG00000185591	6175.72	-0.288211	0.172723	9.79407	0.0074687	0.476548	ENST00000551969	SP1	12	6667		SP1	protein_coding	53380176	53416446	45.65
ENSG00000006459	5603.39	0.828662	0.251598	9.78463	0.00750401	0.476548	ENST00000397560	KDM7A	7	80853	uc003vvm.3	KDM7A	protein_coding	140084746	140177035	39.18
ENSG00000153048	1448.97	-0.607754	0.358563	9.7785	0.00752705	NA	ENST00000396593	CARHSP1	16	23589	uc002czh.2	CARHSP1	protein_coding	8852942	8869012	55.97
ENSG00000170128	149.413	12.4579	3.21216	9.74425	0.00765709	NA	ENST00000304244	GPR25	1	2848	uc001gvn.2	GPR25	protein_coding	200873038	200874123	72.74
ENSG00000228019	7.28911	-10.9858	5.09161	9.70829	0.00779599	NA	ENST00000449887		7	NA		RP11-166O4.4	unprocessed_pseudogene	67307605	67308356	52.13
ENSG00000254056	13.5674	-5.71264	2.2338	9.68787	0.00787601	NA	ENST00000523324	IGHV3-71	14	NA		IGHV3-71	IG_V_pseudogene	106775157	106775618	50
ENSG00000213553	16548.2	-0.475903	0.162211	9.67102	0.00794263	0.476548	ENST00000394878	RPLP0P6	2	NA		RPLP0P6	processed_pseudogene	38481851	38482804	53.56
ENSG00000224114	349.3	-2.34056	0.885366	9.66255	0.00797636	NA	ENST00000451736		1	NA		RP11-343H5.4	processed_pseudogene	206695837	206696269	54.27
ENSG00000156508	278863	-0.304753	0.103284	9.65015	0.00802595	0.476548	ENST00000316292	EEF1A1	6	1915	uc003phi.3	EEF1A1	protein_coding	73515750	73523797	47.14
ENSG00000103275	5940.79	-0.22671	0.159673	9.64435	0.00804927	0.476548	ENST00000355803	UBE2I	16	7329	uc002cld.2	UBE2I	protein_coding	1308880	1327018	59.46
ENSG00000270503	23.1691	-4.3173	2.30658	9.63806	0.00807461	NA	ENST00000604759		14	NA		RP11-407N17.6	processed_pseudogene	39215065	39216335	48.54
ENSG00000131469	31566.5	-0.434271	0.147126	9.62291	0.00813603	0.476548	ENST00000589037	RPL27	17	6155	uc002icj.3	RPL27	protein_coding	42998273	43002959	49.84
ENSG00000169045	40110.2	0.285053	0.0981084	9.61139	0.008183	0.476548	ENST00000393432	HNRNPH1	5	3187	uc003mkf.5	HNRNPH1	protein_coding	179614178	179634784	45.97
ENSG00000159352	4187.77	-0.181028	0.188088	9.60748	0.00819905	0.476548	ENST00000368884	PSMD4	1	5710	uc001exl.3	PSMD4	protein_coding	151254703	151267479	47.67
ENSG00000236552	119556	-0.386414	0.128542	9.57585	0.00832973	0.476548	ENST00000439189	RPL13AP5	10	728658		RPL13AP5	processed_pseudogene	96750288	96750899	57.35
ENSG00000149483	1744.15	0.72545	0.336518	9.54893	0.0084426	NA	ENST00000278826	TMEM138	11	51524	uc001nrl.2	TMEM138	protein_coding	61362001	61369509	48.08
ENSG00000270728	17.8514	-10.4923	3.91098	9.54246	0.00846995	NA	ENST00000604801		1	NA		RP4-657E11.10	processed_pseudogene	19297080	19297903	43.45
ENSG00000196159	2.26385	-4.27682	2.17846	9.49094	0.00869099	NA	ENST00000394329	FAT4	4	79633	uc003ifj.4	FAT4	protein_coding	125316399	125492932	34.44
ENSG00000231064	16.037	-3.12958	2.05145	9.42389	0.00898728	NA	ENST00000447623		1	NA		RP11-263K19.4	antisense	155196868	155205495	54.73
ENSG00000214013	3240.47	0.847829	0.261373	9.42313	0.00899069	0.479217	ENST00000561871	GANC	15	2595		GANC	protein_coding	42273233	42356935	40.5
ENSG00000228253	34619.3	-0.500793	0.171808	9.4152	0.0090264	0.479217	ENST00000361851	MT-ATP8	MT	4509		MT-ATP8	protein_coding	8366	8572	39.61
ENSG00000150687	6.07711	-10.7234	5.09179	9.38254	0.00917504	NA	ENST00000527521	PRSS23	11	11098		PRSS23	protein_coding	86791059	86952910	42.16
ENSG00000006576	2880.48	0.469666	0.207444	9.3701	0.00923226	0.479217	ENST00000422959	PHTF2	7	57157	uc003ugt.4	PHTF2	protein_coding	77798792	77957503	37.65
ENSG00000126353	6311.15	-0.672799	0.29101	9.35924	0.00928253	0.479217	ENST00000246657	CCR7	17	1236	uc002huw.3	CCR7	protein_coding	40553769	40565472	53.29
ENSG00000164638	26.6957	-0.983026	2.85961	9.34754	0.00933702	NA	ENST00000434816	SLC29A4	7	222962		SLC29A4	protein_coding	5274369	5306870	57.52
ENSG00000069966	3966.05	0.286879	0.245798	9.34494	0.00934914	0.479217	ENST00000261837	GNB5	15	10681	uc002abt.1	GNB5	protein_coding	52115105	52191369	45.39
ENSG00000138593	4312.05	0.71762	0.264319	9.34385	0.00935426	0.479217	ENST00000561428	SECISBP2L	15	9728		SECISBP2L	protein_coding	48988476	49046563	36.79
ENSG00000156261	4756.73	-0.400307	0.208218	9.33301	0.00940507	0.479217	ENST00000432178	CCT8	21	10694		CCT8	protein_coding	29055805	29073797	38.32
ENSG00000131724	1608.55	-1.23948	0.48775	9.32555	0.00944024	NA	ENST00000371666	IL13RA1	X	3597	uc004eqs.3	IL13RA1	protein_coding	118727572	118794539	40.36
ENSG00000260018	20.2816	-5.6879	3.41902	9.30577	0.00953407	NA	ENST00000565382		16	NA		RP11-505K9.1	antisense	84117051	84117571	65.64
ENSG00000101997	2116.69	-0.541335	0.352682	9.30081	0.00955773	NA	ENST00000376227	CCDC22	X	28952	uc004dnd.2	CCDC22	protein_coding	49235467	49250526	53.55
ENSG00000213131	24.0901	-2.96556	1.6033	9.27939	0.00966066	NA	ENST00000392459	YWHAZP4	6	NA		YWHAZP4	processed_pseudogene	127355756	127356789	46.71
ENSG00000229897	11.9847	15.7318	3.69534	9.27101	0.00970123	NA	ENST00000420492	SEPT7P7	9	NA		SEPT7P7	processed_pseudogene	98606833	98608133	40.89
ENSG00000178980	1141.09	-0.663467	0.34748	9.23838	0.00986079	NA	ENST00000601048	SEPW1	19	6415	uc021uwp.1	SEPW1	protein_coding	47778572	47784686	54.44
ENSG00000165794	19.6235	2.41799	3.55216	9.2326	0.00988934	NA	ENST00000554422	SLC39A2	14	29986	uc001vys.4	SLC39A2	protein_coding	20999255	21001871	49.06
ENSG00000088882	11.5538	-1.52701	3.65596	9.21355	0.00998396	NA	ENST00000380605	CPXM1	20	56265	uc002wgu.3	CPXM1	protein_coding	2794069	2800637	59.72
ENSG00000230756	12.8355	5.01036	2.24215	9.19509	0.0100765	NA	ENST00000437982	RHOQP3	2	NA		RHOQP3	processed_pseudogene	130212870	130213490	46.54
ENSG00000253910	14.5919	-0.431466	3.73127	9.19025	0.010101	NA	ENST00000622527	PCDHGB2	5	56103	uc011dar.2	PCDHGB2	protein_coding	141360042	141512979	45.22
ENSG00000213362	10.9264	-7.09118	2.71525	9.17928	0.0101565	NA	ENST00000432137	FTH1P12	9	NA		FTH1P12	processed_pseudogene	15527133	15527683	49.55
ENSG00000260572	5.36077	-10.5425	5.09194	9.15874	0.0102613	NA	ENST00000566372		3	NA		RP11-16N11.2	antisense	160753428	160755142	45.71
ENSG00000105401	5563.05	-0.290655	0.153569	9.15631	0.0102738	0.509246	ENST00000222005	CDC37	19	11140	uc002mof.1	CDC37	protein_coding	10391134	10420121	54.04
ENSG00000240669	5.28237	-10.5213	5.09196	9.13274	0.0103956	NA	ENST00000496058		4	NA		RP11-555K12.2	processed_pseudogene	152613875	152614333	54.25
ENSG00000188693	5.26429	-10.5165	5.09196	9.12729	0.010424	NA	ENST00000453068	CYP51A1-AS1	7	613126	uc003ulo.1	CYP51A1-AS1	antisense	92134604	92180725	40.24
ENSG00000178996	3048.24	0.440744	0.251415	9.12658	0.0104277	0.509246	ENST00000326277	SNX18	5	112574	uc003jpj.4	SNX18	protein_coding	54517759	54546585	42.68
ENSG00000105711	6.46908	-2.35546	3.28883	9.10786	0.0105258	NA	ENST00000262631	SCN1B	19	6324	uc002nxp.3	SCN1B	protein_coding	35030684	35040448	55.68
ENSG00000178971	11005.2	0.264055	0.216628	9.06943	0.01073	0.509246	ENST00000315684	CTC1	17	80169	uc002gkq.4	CTC1	protein_coding	8224821	8248044	48.84
ENSG00000229196	29.14	-0.265832	3.48206	9.06897	0.0107324	NA	ENST00000469264		7	NA		RP11-775D22.2	antisense	130141731	130142615	59.55
ENSG00000175893	3597.65	1.10702	0.340622	9.0679	0.0107382	0.509246	ENST00000380916	ZDHHC21	9	340481	uc003zlh.2	ZDHHC21	protein_coding	14611071	14693471	35.18
ENSG00000220842	10008.7	-0.60675	0.220166	9.06101	0.0107752	0.509246	ENST00000495531		10	NA		RP11-572P18.1	processed_pseudogene	120354701	120355183	43.27
ENSG00000196455	1291.26	-0.312077	0.379436	9.05842	0.0107892	NA	ENST00000356763	PIK3R4	3	30849	uc003enj.3	PIK3R4	protein_coding	130678935	130746829	36.67
ENSG00000148795	9.30945	-7.51462	2.87907	9.05656	0.0107992	NA	ENST00000369887	CYP17A1	10	1586	uc001kwg.3	CYP17A1	protein_coding	102830531	102837533	52.48
ENSG00000135519	50.2276	8.04246	2.99382	9.00216	0.011097	NA	ENST00000257981	KCNH3	12	23416	uc001ruh.1	KCNH3	protein_coding	49539157	49558308	57.61
ENSG00000211945	2843.05	-0.544216	0.407752	8.97707	0.0112371	0.523488	ENST00000390605	IGHV1-18	14	NA		IGHV1-18	IG_V_gene	106184901	106185394	56.48
ENSG00000173825	157.597	8.7769	2.09147	8.96652	0.0112965	NA	ENST00000309880	TIGD3	11	220359	uc001odo.4	TIGD3	protein_coding	65354767	65357613	63.44
ENSG00000262434	10.9317	0.0120752	5.02795	8.96003	0.0113333	NA	ENST00000574560		17	NA		RP11-676J12.8	antisense	789744	790525	54.99
ENSG00000156711	3310.49	-0.679584	0.311983	8.94598	0.0114131	0.5242	ENST00000476951	MAPK13	6	5603		MAPK13	protein_coding	36127809	36144524	53.28
ENSG00000164530	145.081	11.8252	3.27633	8.93653	0.0114672	NA	ENST00000373674	PI16	6	221476	uc003ona.3	PI16	protein_coding	36948263	36964837	51.13
ENSG00000233837	26.1049	1.53395	1.49622	8.90426	0.0116537	NA	ENST00000457262	EIF3LP2	10	NA		EIF3LP2	processed_pseudogene	42566677	42567483	49.69
ENSG00000141522	5839.08	-0.322598	0.187194	8.88943	0.0117405	0.531745	ENST00000582520	ARHGDIA	17	396		ARHGDIA	protein_coding	81867721	81871406	68.12
ENSG00000065802	2399.64	-0.45337	0.271833	8.88239	0.0117819	NA	ENST00000463352	ASB1	2	51665		ASB1	protein_coding	238426742	238452250	47.31
ENSG00000259704	4.53475	-10.3013	5.09217	8.86079	0.0119098	NA	ENST00000558221		15	NA		CTD-3094K11.1	sense_overlapping	90839724	90841378	53.53
ENSG00000104901	11.9889	-6.49853	3.25739	8.81997	0.0121554	NA	ENST00000594268	DKKL1	19	27120		DKKL1	protein_coding	49361783	49375116	50.25
ENSG00000090861	2353.71	-0.41592	0.359176	8.81887	0.012162	NA	ENST00000261772	AARS	16	16	uc002eyn.1	AARS	protein_coding	70252295	70289543	49.47
ENSG00000272832	4.42081	-10.2643	5.0922	8.81394	0.0121921	NA	ENST00000608823		3	NA		RP11-91K8.5	lincRNA	133543064	133543466	48.39
ENSG00000140090	29.9202	-6.54985	3.50401	8.81208	0.0122034	NA	ENST00000393265	SLC24A4	14	123041	uc001yai.3	SLC24A4	protein_coding	92322581	92501483	47.94
ENSG00000115207	2523.14	-0.15249	0.286967	8.79329	0.0123186	0.550288	ENST00000359541	GTF3C2	2	2976	uc002rju.2	GTF3C2	protein_coding	27325849	27357034	46.39
ENSG00000226828	14.5314	-5.66855	4.20909	8.78112	0.0123938	NA	ENST00000440494		1	339529	uc001iac.4	RP11-278H7.1	lincRNA	243917402	244047317	42.51
ENSG00000188677	1720.97	-0.76359	0.350514	8.77552	0.0124285	NA	ENST00000406477	PARVB	22	29780	uc003bem.3	PARVB	protein_coding	43999211	44172949	50.79
ENSG00000105483	7451.05	0.535413	0.174776	8.76396	0.0125006	0.55087	ENST00000600800	CARD8	19	22900		CARD8	protein_coding	48180770	48255946	44.39
ENSG00000246526	4.285	-10.2194	5.09225	8.75839	0.0125355	NA	ENST00000499502		4	339988		RP11-539L10.2	lincRNA	6687448	6690519	55.99
ENSG00000236452	43.5887	-7.23869	3.21645	8.75279	0.0125706	NA	ENST00000455974		3	NA		AC123023.1	lincRNA	34203244	34268811	40.05
ENSG00000255220	64.8367	11.7742	3.53391	8.74788	0.0126015	NA	ENST00000534547	DDX18P5	11	NA		DDX18P5	processed_pseudogene	130295641	130296946	40.96
ENSG00000199875	4.24808	-10.2071	5.09227	8.74444	0.0126232	NA	ENST00000363005		11	NA		Y_RNA	misc_RNA	93719603	93719715	37.17
ENSG00000109906	412.014	-3.89807	1.59233	8.7311	0.0127077	NA	ENST00000335953	ZBTB16	11	7704	uc001pop.3	ZBTB16	protein_coding	114059593	114250676	47.44
ENSG00000167306	143.136	0.235158	2.38875	8.68941	0.0129754	NA	ENST00000285039	MYO5B	18	4645	uc002leb.2	MYO5B	protein_coding	49822813	50195093	44.5
ENSG00000185986	706.289	-0.233382	0.405707	8.644	0.0132733	NA	ENST00000515467	SDHAP3	5	NA	uc011cme.2	SDHAP3	transcribed_unprocessed_pseudogene	1572222	1594620	47.9
ENSG00000138101	495.961	1.7309	0.700789	8.64045	0.0132969	NA	ENST00000398951	DTNB	2	1838	uc002rgi.4	DTNB	protein_coding	25377198	25673647	41.46
ENSG00000105219	19.0417	-8.08675	3.11831	8.63482	0.0133344	NA	ENST00000599263	CNTD2	19	79935		CNTD2	protein_coding	40222208	40226690	57.48
ENSG00000248202	10.2251	-4.57554	3.54099	8.6258	0.0133947	NA	ENST00000502324		5	NA		RP11-455B3.1	lincRNA	97881420	97922695	36.52
ENSG00000077150	10488.7	-0.361693	0.12888	8.61602	0.0134603	0.570279	ENST00000593908	NFKB2	10	4791		NFKB2	protein_coding	102394110	102402529	61.37
ENSG00000250222	3.91186	-10.0879	5.0924	8.59559	0.0135985	NA	ENST00000514487		5	NA		CTC-338M12.5	antisense	181191924	181194429	53.19
ENSG00000268222	8.62591	-4.63068	2.45751	8.57948	0.0137085	NA	ENST00000596811	EEF1A1P7	19	NA		EEF1A1P7	processed_pseudogene	35382172	35384052	45.03
ENSG00000240409	19.3577	-1.05439	0.503999	8.57162	0.0137625	NA	ENST00000467115	MTATP8P1	1	NA		MTATP8P1	unprocessed_pseudogene	633535	633741	38.16
ENSG00000174444	65753.7	-0.30231	0.10572	8.55131	0.0139029	0.570279	ENST00000307961	RPL4	15	6124	uc002apv.3	RPL4	protein_coding	66498015	66524532	42.06
ENSG00000086062	11329.8	0.768054	0.259551	8.54624	0.0139382	0.570279	ENST00000379731	B4GALT1	9	2683	uc003zsg.2	B4GALT1	protein_coding	33104082	33167356	47.1
ENSG00000083312	4092.9	-0.00537654	0.230902	8.54278	0.0139624	0.570279	ENST00000337273	TNPO1	5	3842	uc003kck.4	TNPO1	protein_coding	72816312	72916733	37.25
ENSG00000172932	5093.93	-0.0970755	0.240904	8.53868	0.013991	0.570279	ENST00000447274	ANKRD13D	11	338692	uc001oke.2	ANKRD13D	protein_coding	67288547	67302485	53.51
ENSG00000121073	887.855	0.332041	0.381162	8.53529	0.0140148	NA	ENST00000240333	SLC35B1	17	10237	uc002iph.2	SLC35B1	protein_coding	49700943	49709014	47.79
ENSG00000182774	39147.4	-0.425816	0.155586	8.53278	0.0140324	0.570279	ENST00000330244	RPS17	15	6218	uc002bhr.1	RPS17	protein_coding	82536753	82540564	49.9
ENSG00000180398	2387.98	0.673418	0.279	8.52902	0.0140588	NA	ENST00000409105	MCFD2	2	90411	uc002rvk.3	MCFD2	protein_coding	46901870	46941855	45.38
ENSG00000169554	4032.98	0.55404	0.198905	8.5112	0.0141846	0.570279	ENST00000627532	ZEB2	2	9839	uc002tvu.3	ZEB2	protein_coding	144384081	144524583	38.54
ENSG00000170471	4107.95	0.447443	0.193911	8.4894	0.0143401	0.570279	ENST00000262879	RALGAPB	20	57148	uc002xiw.4	RALGAPB	protein_coding	38472816	38578861	39.37
ENSG00000115170	137.607	12.5252	3.34052	8.465	0.014516	NA	ENST00000263640	ACVR1	2	90	uc002tzn.3	ACVR1	protein_coding	157736444	157875862	40.31
ENSG00000133316	2361	-0.588573	0.257305	8.44035	0.014696	NA	ENST00000536401	WDR74	11	54663		WDR74	protein_coding	62832342	62841809	51.65
ENSG00000224578	10043.9	-0.461008	0.179548	8.43967	0.014701	0.571251	ENST00000562726	HNRNPA1P48	16	664709		HNRNPA1P48	transcribed_processed_pseudogene	51645756	51647132	45.03
ENSG00000145246	3289.13	0.930795	0.299313	8.4378	0.0147148	0.571251	ENST00000273859	ATP10D	4	57205	uc003gxk.1	ATP10D	protein_coding	47485288	47593486	37.6
ENSG00000265123	3.54777	-9.94674	5.09258	8.41979	0.0148479	NA	ENST00000585129	RN7SL200P	6	NA		RN7SL200P	misc_RNA	34685355	34685642	54.17
ENSG00000235587	13.171	6.49079	2.58638	8.39884	0.0150043	NA	ENST00000425487	GAPDHP65	X	NA		GAPDHP65	processed_pseudogene	46439709	46440714	53.68
ENSG00000245532	23971.6	0.760059	0.264795	8.37832	0.015159	0.58157	ENST00000499732	NEAT1	11	NA	uc010rog.2	NEAT1	lincRNA	65422774	65445540	44.06
ENSG00000271788	3.45218	-9.90727	5.09263	8.37058	0.0152178	NA	ENST00000607715		5	NA		CTD-2201E18.5	lincRNA	43006733	43007543	50.06
ENSG00000255753	6.47933	-9.7786	5.09173	8.36999	0.0152223	NA	ENST00000543664		12	NA		RP11-22B23.2	processed_pseudogene	9314402	9316173	57.79
ENSG00000136040	2087.23	0.896178	0.375013	8.35962	0.0153014	NA	ENST00000258526	PLXNC1	12	10154	uc001tdc.3	PLXNC1	protein_coding	94148723	94307675	43.75
ENSG00000116406	1879.21	0.712827	0.323895	8.35221	0.0153582	NA	ENST00000318130	EDEM3	1	80267	uc010pok.2	EDEM3	protein_coding	184690231	184754913	34.39
ENSG00000246560	29.4901	1.88761	3.8732	8.33813	0.0154667	NA	ENST00000501133		4	NA	uc003hws.1	RP11-10L12.4	antisense	102828055	102844075	39.07
ENSG00000166783	12448.5	0.341928	0.13933	8.33669	0.0154778	0.585971	ENST00000396368	KIAA0430	16	9665	uc010uzw.2	KIAA0430	protein_coding	15594386	15643166	44.18
ENSG00000229204	33.0625	1.96305	1.95179	8.32177	0.0155937	NA	ENST00000511479	PTGES3P3	4	NA		PTGES3P3	processed_pseudogene	169791221	169791702	37.76
ENSG00000223356	78.7442	0.902384	3.26957	8.32098	0.0155999	NA	ENST00000428641		1	NA		RP11-66D17.5	antisense	156712212	156713174	53.58
ENSG00000139644	18607.2	-0.201368	0.132358	8.31673	0.0156331	0.585971	ENST00000548809	TMBIM6	12	7009		TMBIM6	protein_coding	49707725	49764934	43.42
ENSG00000272977	126.081	11.972	3.28318	8.31609	0.0156381	NA	ENST00000609475		22	NA		CTA-390C10.10	sense_intronic	25476218	25479971	47.07
ENSG00000241907	11.912	-11.6754	5.09125	8.3104	0.0156827	NA	ENST00000461659	RPS20P4	5	NA		RPS20P4	processed_pseudogene	150021567	150021921	42.54
ENSG00000229162	18.3451	-23.7006	4.00774	8.28286	0.0159001	NA	ENST00000456316		1	NA		RP11-84D1.1	antisense	24961345	24963097	53.34
ENSG00000244313	20127.6	-0.432174	0.15538	8.27835	0.015936	0.587151	ENST00000467930		11	NA	uc031xoa.1	RP11-425L10.1	processed_pseudogene	46428653	46429150	54.22
ENSG00000130382	1989.21	-0.0318103	0.257352	8.27332	0.0159761	NA	ENST00000585588	MLLT1	19	4298		MLLT1	protein_coding	6210379	6279948	55.57
ENSG00000225178	3.25969	-9.82469	5.09275	8.26955	0.0160062	NA	ENST00000484897	RPSAP56	16	NA		RPSAP56	processed_pseudogene	73940639	73941524	52.14
ENSG00000215381	10.2278	-7.74663	3.08388	8.26884	0.016012	NA	ENST00000442089		1	NA		RP5-1057J7.1	processed_pseudogene	23244765	23245224	55.65
ENSG00000278231	143.563	11.2871	3.42179	8.26464	0.0160456	NA	ENST00000618168		20	NA		RP5-906C1.1	lincRNA	48821688	48849458	47.64
ENSG00000166340	7692.51	0.712906	0.241591	8.25505	0.0161228	0.587151	ENST00000299427	TPP1	11	1200	uc001mel.1	TPP1	protein_coding	6612763	6619461	50.28
ENSG00000240376	1055.68	-0.591985	0.217361	8.24755	0.0161833	NA	ENST00000467270		5	NA		RP11-36C20.1	processed_pseudogene	33162179	33162807	51.19
ENSG00000134255	3795.44	0.280075	0.232753	8.24491	0.0162047	0.587151	ENST00000498239	CEPT1	1	10390		CEPT1	protein_coding	111139627	111185102	36.54
ENSG00000104643	1239.09	0.113732	0.325537	8.22012	0.0164068	NA	ENST00000221086	MTMR9	8	66036	uc003wtm.3	MTMR9	protein_coding	11284416	11328146	37.85
ENSG00000213015	1638.17	0.532743	0.313468	8.2118	0.0164752	NA	ENST00000592881	ZNF580	19	51157		ZNF580	protein_coding	55635016	55643469	57.45
ENSG00000106069	42.4836	7.26617	2.93952	8.20949	0.0164942	NA	ENST00000582692	CHN2	7	1124		CHN2	protein_coding	29122274	29514328	42.02
ENSG00000275294	13.882	-8.46948	3.32587	8.18832	0.0166697	NA	ENST00000610335		13	NA		RP11-428O18.6	lincRNA	27178263	27251288	42.1
ENSG00000175061	5600.48	-0.436096	0.162558	8.1844	0.0167025	0.588095	ENST00000584177	LRRC75A-AS1	17	125144	uc021tra.1	LRRC75A-AS1	processed_transcript	16438822	16478678	52.34
ENSG00000145725	2634.06	0.697769	0.240454	8.16437	0.0168705	0.588095	ENST00000515845	PPIP5K2	5	23262		PPIP5K2	protein_coding	103120149	103212799	34.29
ENSG00000170315	15932.9	-0.3574	0.136829	8.14648	0.0170222	0.588095	ENST00000577958	UBB	17	7314	uc021tqs.2	UBB	protein_coding	16380798	16382745	51.44
ENSG00000122786	28.8921	1.13254	3.27469	8.12745	0.0171849	NA	ENST00000417172	CALD1	7	800	uc003vsb.3	CALD1	protein_coding	134744252	134970728	40.05
ENSG00000241255	15.3002	9.81632	3.98682	8.12707	0.0171882	NA	ENST00000473603		11	NA		RP1-89D4.1	processed_pseudogene	33237008	33237409	44.53
ENSG00000184083	565.137	1.03758	0.586722	8.12595	0.0171978	NA	ENST00000375180	FAM120C	X	54954	uc004dsz.4	FAM120C	protein_coding	54068324	54183281	42.69
ENSG00000174282	4636.99	-0.115235	0.231239	8.11476	0.0172943	0.588095	ENST00000380599	ZBTB4	17	57659	uc002ghc.4	ZBTB4	protein_coding	7459366	7484263	54.92
ENSG00000164587	71569.3	-0.435154	0.170769	8.10403	0.0173873	0.588095	ENST00000401695	RPS14	5	6208	uc003lsi.3	RPS14	protein_coding	150443190	150449756	48.97
ENSG00000142197	5389.36	0.618811	0.208211	8.10204	0.0174046	0.588095	ENST00000270190	DOPEY2	21	9980		DOPEY2	protein_coding	36156782	36294274	47.09
ENSG00000257616	2.95641	-9.68417	5.09296	8.0978	0.0174415	NA	ENST00000552545		12	NA		RP11-641A6.5	processed_pseudogene	52730425	52732865	50.18
ENSG00000116478	9177.97	-0.383458	0.138817	8.08811	0.0175263	0.588095	ENST00000373548	HDAC1	1	3065	uc001bvb.1	HDAC1	protein_coding	32292086	32333635	46.79
ENSG00000196664	1834.54	0.917793	0.348871	8.05874	0.0177856	NA	ENST00000380659	TLR7	X	51284	uc004cvc.3	TLR7	protein_coding	12867083	12890380	40.25
ENSG00000066923	828.217	-1.4363	0.712734	8.05234	0.0178425	NA	ENST00000426455	STAG3	7	10734	uc032zyz.1	STAG3	protein_coding	100177563	100221488	47.11
ENSG00000179456	5584.11	0.473049	0.162956	8.03856	0.0179659	0.588095	ENST00000358704	ZBTB18	1	10472	uc001iad.5	ZBTB18	protein_coding	244048939	244057476	44.35
ENSG00000118308	7046.77	0.507098	0.18858	8.03658	0.0179837	0.588095	ENST00000557270	LRMP	12	4033		LRMP	protein_coding	25021002	25108334	38.29
ENSG00000230869	39.086	2.58061	2.58977	8.03549	0.0179935	NA	ENST00000454844	CTGLF10P	10	NA		CTGLF10P	unprocessed_pseudogene	45678692	45700532	40.58
ENSG00000227492	41.7108	-4.2329	2.41218	8.0337	0.0180096	NA	ENST00000444359		10	NA		RP11-316M21.6	antisense	100229667	100234000	45.85
ENSG00000163939	3727.76	0.549661	0.191959	8.03097	0.0180342	0.588095	ENST00000356770	PBRM1	3	55193	uc003der.2	PBRM1	protein_coding	52545352	52685917	40.81
ENSG00000231043	1853.58	0.407525	0.258901	8.01064	0.0182184	NA	ENST00000434096		2	NA		AC007238.1	processed_pseudogene	58460292	58462032	48.19
ENSG00000188004	16.787	-17.3741	4.59684	8.00483	0.0182714	NA	ENST00000368102	C1orf204	1	284677	uc001fug.1	C1orf204	protein_coding	159834474	159855347	48.18
ENSG00000166532	2211.16	1.03172	0.341702	8.00035	0.0183125	NA	ENST00000538758	RIMKLB	12	57494		RIMKLB	protein_coding	8681600	8783095	41.05
ENSG00000135776	1288.85	0.0894016	0.425765	7.98972	0.01841	NA	ENST00000344517	ABCB10	1	23456	uc001htp.4	ABCB10	protein_coding	229516582	229558695	43.62
ENSG00000215021	6442.97	-0.431177	0.189858	7.98148	0.018486	0.59686	ENST00000537646	PHB2	12	11331		PHB2	protein_coding	6965327	6970825	53.17
ENSG00000207440	2.7681	-9.58894	5.09311	7.97871	0.0185117	NA	ENST00000384709	RNU6-541P	14	NA		RNU6-541P	snRNA	31142939	31143048	38.18
ENSG00000213051	11.7191	0.361247	3.11831	7.95489	0.0187334	NA	ENST00000392009	RPL5P5	1	NA		RPL5P5	processed_pseudogene	185226808	185227700	41.88
ENSG00000168438	3221.64	0.808859	0.275698	7.95175	0.0187629	0.59986	ENST00000606893	CDC40	6	51362		CDC40	protein_coding	110180141	110254275	37.34
ENSG00000264659	2.71784	-9.56291	5.09316	7.9487	0.0187915	NA	ENST00000582959		17	NA		CTD-2006K23.2	antisense	74672712	74677600	43.83
ENSG00000220583	87.6737	-1.10322	0.826605	7.94185	0.018856	NA	ENST00000402419	RPL35P2	6	NA		RPL35P2	processed_pseudogene	34263311	34263673	57.02
ENSG00000278917	27.4204	4.78759	3.95847	7.93218	0.0189474	NA	ENST00000623722		19	NA		RP11-15A1.4	TEC	43891233	43895411	37.38
ENSG00000108219	2582	-0.173588	0.254563	7.92523	0.0190134	0.60076	ENST00000429989	TSPAN14	10	81619	uc001kcj.4	TSPAN14	protein_coding	80454166	80533123	49.31
ENSG00000134278	20.5785	20.8573	4.69002	7.91501	0.0191108	NA	ENST00000409402	SPIRE1	18	56907	uc002kre.3	SPIRE1	protein_coding	12446512	12658134	40.66
ENSG00000198755	39611.5	-0.263881	0.0971122	7.90992	0.0191595	0.60076	ENST00000322203	RPL10A	6	4736	uc003okp.1	RPL10A	protein_coding	35468408	35470785	57.02
ENSG00000258947	48.5284	21.9752	4.08154	7.87511	0.0194958	NA	ENST00000555810	TUBB3	16	10381	uc010ciz.1	TUBB3	protein_coding	89921392	89938761	58.5
ENSG00000131652	1213.34	-0.832872	0.322312	7.85402	0.0197024	NA	ENST00000576143	THOC6	16	79228		THOC6	protein_coding	3024027	3027755	57.25
ENSG00000233503	12.5431	2.68229	2.91542	7.84314	0.0198099	NA	ENST00000421896	HNRNPLP1	6	NA		HNRNPLP1	processed_pseudogene	7481094	7482594	54.1
ENSG00000115956	6992.52	0.555446	0.249775	7.8368	0.0198729	0.617194	ENST00000234313	PLEK	2	5341	uc002sen.4	PLEK	protein_coding	68365173	68397453	41.22
ENSG00000121101	12.7278	20.1713	4.11573	7.80587	0.0201826	NA	ENST00000389934	TEX14	17	56155	uc002iwr.2	TEX14	protein_coding	58556678	58692055	45.25
ENSG00000109436	8366.26	0.735382	0.260445	7.79486	0.020294	0.624327	ENST00000442267	TBC1D9	4	23158	uc010ioj.3	TBC1D9	protein_coding	140620765	140756120	41.09
ENSG00000100591	2334.7	-0.65863	0.28008	7.78885	0.0203551	NA	ENST00000555133	AHSA1	14	10598	uc001xtw.3	AHSA1	protein_coding	77457870	77469474	46.04
ENSG00000213714	21.5512	-8.8866	4.43693	7.77621	0.0204841	NA	ENST00000371325	FAM209B	20	388799	uc002xxz.4	FAM209B	protein_coding	56533246	56536520	48.46
ENSG00000198590	50.9238	8.45814	2.83493	7.73729	0.0208867	NA	ENST00000425932	C3orf35	3	NA		C3orf35	lincRNA	37386269	37435497	42.19
ENSG00000061918	18.247	-1.50082	3.24613	7.73619	0.0208982	NA	ENST00000505154	GUCY1B3	4	2983	uc003ipd.3	GUCY1B3	protein_coding	155758992	155807591	36.52
ENSG00000229251	9.64145	-3.55248	1.97734	7.71316	0.0211402	NA	ENST00000436090	HNRNPA1P8	7	NA		HNRNPA1P8	processed_pseudogene	84983556	84984506	46.06
ENSG00000249753	2.37119	-9.36608	5.09352	7.70579	0.0212182	NA	ENST00000509615		12	NA		RP11-415I12.3	antisense	63623788	63795718	37.92
ENSG00000268056	11.2739	-0.594308	2.60256	7.69924	0.0212879	NA	ENST00000597216		19	NA		CTD-3032J10.2	antisense	17152588	17168051	48.95
ENSG00000176953	4888.45	0.251596	0.165781	7.69777	0.0213034	0.649257	ENST00000564978	NFATC2IP	16	84901	uc002drt.3	NFATC2IP	protein_coding	28950807	28967097	49.47
ENSG00000267122	5.80588	1.7318	2.46908	7.69165	0.0213688	NA	ENST00000585593		19	NA	uc002lvd.1	AC004490.1	antisense	2212029	2215565	59.09
ENSG00000260571	20.7681	20.3603	4.94372	7.66446	0.0216612	NA	ENST00000562290	BNIP3P5	15	NA		BNIP3P5	processed_pseudogene	42313687	42314386	44.43
ENSG00000259144	3.64411	-6.13821	2.61962	7.66098	0.0216989	NA	ENST00000557256	RANBP20P	14	NA		RANBP20P	processed_pseudogene	20720742	20723127	48.78
ENSG00000244693	18.0192	-7.82461	3.30663	7.65805	0.0217308	NA	ENST00000487179	CTAGE8	7	100142659	uc010lpe.4	CTAGE8	protein_coding	144266701	144269288	41.81
ENSG00000087087	7600.69	-0.164352	0.178205	7.65557	0.0217577	0.649332	ENST00000620394	SRRT	7	51593		SRRT	protein_coding	100875111	100888664	53.17
ENSG00000233155	19.8286	-0.698503	2.39947	7.64981	0.0218205	NA	ENST00000414130	HMGA1P8	2	NA		HMGA1P8	processed_pseudogene	74418122	74418442	59.5
ENSG00000160683	1360.36	-0.249247	0.419444	7.64883	0.0218312	NA	ENST00000292174	CXCR5	11	643	uc001pue.4	CXCR5	protein_coding	118883766	118897799	54.19
ENSG00000248795	7.0969	-0.733437	2.19928	7.64269	0.0218984	NA	ENST00000502915		4	NA		RP11-173E2.1	processed_pseudogene	138560704	138561941	55.98
ENSG00000268070	20.9393	-4.90133	5.36969	7.62817	0.0220579	NA	ENST00000601729		19	NA		AC006539.3	processed_pseudogene	20033444	20034332	46.79
ENSG00000168389	79.3401	19.7943	3.65085	7.62644	0.022077	NA	ENST00000372811	MFSD2A	1	84879	uc001ceu.4	MFSD2A	protein_coding	39955112	39969968	53.7
ENSG00000243431	11.7109	0.254653	2.4707	7.6249	0.022094	NA	ENST00000465511	RPL5P30	11	NA		RPL5P30	processed_pseudogene	118560690	118561580	42.87
ENSG00000277692	30.7013	-1.01337	3.61883	7.61463	0.0222077	NA	ENST00000612444		20	NA		RP11-358N2.2	lincRNA	32355053	32355734	40.62
ENSG00000174527	20.1992	-2.68839	2.0395	7.60886	0.0222719	NA	ENST00000310903	MYO1H	12	283446	uc010sxn.1	MYO1H	protein_coding	109347903	109455523	43.12
ENSG00000253132	2.90972	-3.96913	1.7305	7.58784	0.0225072	NA	ENST00000520057	IGHV3-62	14	NA		IGHV3-62	IG_V_pseudogene	106643142	106643585	50.23
ENSG00000177710	15.6832	-6.9801	3.30812	7.58673	0.0225197	NA	ENST00000382435	SLC35G5	8	83650	uc003wtp.1	SLC35G5	protein_coding	11330888	11332208	57.68
ENSG00000198911	10883.6	-0.474813	0.180076	7.58153	0.0225784	0.649332	ENST00000361204	SREBF2	22	6721	uc003bbi.4	SREBF2	protein_coding	41833079	41907308	48.21
ENSG00000106397	1115.83	-0.53365	0.330426	7.57917	0.022605	NA	ENST00000454310	PLOD3	7	8985		PLOD3	protein_coding	101205977	101218420	58.5
ENSG00000108389	4856.18	-0.435377	0.185508	7.57374	0.0226664	0.649332	ENST00000579925	MTMR4	17	9110	uc002iwj.2	MTMR4	protein_coding	58489529	58517905	47.85
ENSG00000160856	18073.8	0.0636435	0.288385	7.56514	0.0227641	0.649332	ENST00000457799	FCRL3	1	115352		FCRL3	protein_coding	157674321	157700857	40.64
ENSG00000176623	1477.68	1.08907	0.381469	7.55925	0.0228313	NA	ENST00000517710	RMDN1	8	51115		RMDN1	protein_coding	86468257	86514357	38.38
ENSG00000100934	1388.04	0.70274	0.365319	7.55517	0.0228778	NA	ENST00000554615	SEC23A	14	10484		SEC23A	protein_coding	39031919	39109646	38.8
ENSG00000125245	1616.62	0.513969	0.440113	7.55395	0.0228918	NA	ENST00000340807	GPR18	13	2841	uc010afv.3	GPR18	protein_coding	99254714	99261744	37.42
ENSG00000120963	4470.68	0.586981	0.206657	7.54947	0.0229432	0.649332	ENST00000520984	ZNF706	8	51123	uc003ykb.3	ZNF706	protein_coding	101177878	101206193	40.04
ENSG00000116221	1239.38	0.145858	0.322652	7.5489	0.0229498	NA	ENST00000487096	MRPL37	1	51253		MRPL37	protein_coding	54184041	54225464	48.9
ENSG00000269153	57.7474	7.0745	2.37282	7.54632	0.0229794	NA	ENST00000600506	LYPLA2P2	19	NA		LYPLA2P2	processed_pseudogene	7879445	7880120	58.73
ENSG00000140391	8054.08	-0.177826	0.277641	7.54561	0.0229875	0.649332	ENST00000267970	TSPAN3	15	10099	uc002bcj.3	TSPAN3	protein_coding	77041404	77083984	41.92
ENSG00000159231	129.918	11.9005	3.36012	7.54383	0.023008	NA	ENST00000290354	CBR3	21	874	uc002yve.3	CBR3	protein_coding	36134912	36146566	48.69
ENSG00000019582	422558	-0.205873	0.0816482	7.53549	0.0231041	0.649332	ENST00000377795	CD74	5	972	uc003lse.3	CD74	protein_coding	150401637	150412929	53.3
ENSG00000074603	3200.86	0.658269	0.230617	7.5187	0.0232989	0.649332	ENST00000341861	DPP8	15	54878	uc002aov.3	DPP8	protein_coding	65442463	65517704	40.97
ENSG00000164941	2928.4	0.531931	0.230388	7.51206	0.0233764	0.649332	ENST00000522171	INTS8	8	55656		INTS8	protein_coding	94813311	94881746	40.21
ENSG00000116514	1345.13	1.46079	0.477741	7.51032	0.0233967	NA	ENST00000373456	RNF19B	1	127544	uc010oho.2	RNF19B	protein_coding	32936445	32964685	44.34
ENSG00000127947	2614.62	0.409205	0.371272	7.5079	0.0234251	0.649332	ENST00000248594	PTPN12	7	5782	uc003ugh.2	PTPN12	protein_coding	77537275	77640071	38.16
ENSG00000048028	3906.43	0.389532	0.198231	7.50183	0.0234962	0.649332	ENST00000003302	USP28	11	57646	uc001poh.3	USP28	protein_coding	113797874	113875570	41.45
ENSG00000197321	114.096	8.31176	2.1983	7.49822	0.0235387	NA	ENST00000375400	SVIL	10	6840	uc001iuu.1	SVIL	protein_coding	29457338	29736781	43.61
ENSG00000088298	1609.52	-0.555106	0.241739	7.49477	0.0235793	NA	ENST00000374491	EDEM2	20	55741	uc002xbq.2	EDEM2	protein_coding	35115357	35147364	45.82
ENSG00000250474	15.9078	11.6928	5.11505	7.49002	0.0236353	NA	ENST00000515260	WBP1LP2	7	NA		WBP1LP2	processed_pseudogene	107628553	107629498	55.92
ENSG00000248774	3.8165	-9.01092	5.09246	7.46179	0.0239714	NA	ENST00000507803		4	NA		RP11-798M19.3	antisense	173322206	173329694	35.99
ENSG00000213057	964.874	1.52163	0.644497	7.45301	0.0240769	NA	ENST00000367638	C1orf220	1	400798		C1orf220	lincRNA	178542752	178548889	49.25
ENSG00000123009	29.1211	-1.45466	1.00161	7.44211	0.0242084	NA	ENST00000426182	NME2P1	12	NA		NME2P1	processed_pseudogene	120282303	120282716	52.9
ENSG00000223984	17.4842	2.72989	2.01217	7.44203	0.0242094	NA	ENST00000453465	HNRNPRP1	10	NA		HNRNPRP1	processed_pseudogene	21624592	21626286	45.6
ENSG00000156738	103327	0.283104	0.101762	7.41682	0.0245165	0.663937	ENST00000524807	MS4A1	11	931		MS4A1	protein_coding	60455752	60470760	40.06
ENSG00000203875	5370.15	-0.534576	0.273294	7.39057	0.0248403	0.663937	ENST00000623163	SNHG5	6	NA		SNHG5	processed_transcript	85660950	85678736	40.9
ENSG00000105926	1822.82	0.726774	0.335435	7.3873	0.024881	NA	ENST00000432190	MPP6	7	51678		MPP6	protein_coding	24573268	24694193	35.88
ENSG00000170638	3863.91	0.391713	0.210585	7.38543	0.0249042	0.663937	ENST00000380909	TRABD	22	80305	uc003bjs.1	TRABD	protein_coding	50185915	50199598	62.8
ENSG00000269102	8.35669	-9.27397	4.13984	7.38426	0.0249189	NA	ENST00000594865		19	NA		CTD-2525I3.5	antisense	52284780	52297920	44.86
ENSG00000228201	68.34	10.7476	3.32662	7.37378	0.0250497	NA	ENST00000455294		16	NA		AL022341.3	antisense	648473	649200	66.35
ENSG00000261744	5.3998	-8.48669	5.04208	7.36983	0.0250993	NA	ENST00000563243		16	NA		RP11-21B21.4	antisense	88512960	88531053	60.5
ENSG00000075151	4450.99	0.304255	0.196927	7.36857	0.0251152	0.663937	ENST00000264211	EIF4G3	1	8672	uc010odj.2	EIF4G3	protein_coding	20806292	21176888	39.36
ENSG00000114942	13647.6	-0.412622	0.156921	7.35975	0.0252261	0.663937	ENST00000236957	EEF1B2	2	1933	uc002vbg.1	EEF1B2	protein_coding	206159585	206162928	45.25
ENSG00000243710	6.19223	0.0494584	3.47895	7.35198	0.0253244	NA	ENST00000372492	CFAP57	1	149465	uc021omk.1	CFAP57	protein_coding	43172149	43254358	44.04
ENSG00000228205	557.584	-0.944031	0.437556	7.34961	0.0253544	NA	ENST00000433853		3	NA		RP11-778D9.4	processed_pseudogene	184149704	184150435	52.19
ENSG00000201863	1.93848	-9.07525	5.09415	7.34651	0.0253937	NA	ENST00000364993		4	NA		SNORA51	snoRNA	40082983	40083106	53.23
ENSG00000186432	3321.07	0.423761	0.260241	7.34217	0.0254488	0.663937	ENST00000334256	KPNA4	3	3840	uc003fdn.3	KPNA4	protein_coding	160494995	160565588	37.2
ENSG00000104921	16832	-0.513083	0.268677	7.33814	0.0255002	0.663937	ENST00000597312	FCER2	19	2208		FCER2	protein_coding	7688758	7702146	53.51
ENSG00000272745	21.157	-7.26561	4.13627	7.33795	0.0255026	NA	ENST00000609858		7	NA		RP5-1007H16.1	lincRNA	7619872	7620543	30.8
ENSG00000132128	1619.69	-0.0320577	0.406694	7.33681	0.0255171	NA	ENST00000496156	LRRC41	1	10489		LRRC41	protein_coding	46261196	46303608	47.41
ENSG00000211584	611.6	-0.580341	0.574851	7.32102	0.0257194	NA	ENST00000548498	SLC48A1	12	55652		SLC48A1	protein_coding	47753916	47782753	52.68
ENSG00000239911	83.8282	11.899	3.4402	7.32085	0.0257215	NA	ENST00000464464	PRKAG2-AS1	7	NA	uc003wko.2	PRKAG2-AS1	antisense	151877042	151879223	60.13
ENSG00000213860	52.1708	-1.52573	0.626222	7.31879	0.0257481	NA	ENST00000396599	RPL21P75	7	NA		RPL21P75	processed_pseudogene	20002765	20003247	43.06
ENSG00000240898	18.1021	0.362505	2.91561	7.31853	0.0257514	NA	ENST00000486753		17	NA		RP11-48B14.1	processed_pseudogene	3665220	3665702	44.72
ENSG00000182057	8.48944	-10.8515	4.50298	7.30627	0.0259098	NA	ENST00000332965	OGFRP1	22	388906	uc003bcl.3	OGFRP1	lincRNA	42269753	42275196	57.75
ENSG00000266993	133.777	12.5481	3.48004	7.30551	0.0259196	NA	ENST00000629102		1	NA		RP4-657D16.3	antisense	51793934	51799154	42.62
ENSG00000188404	36101.3	-0.153991	0.159634	7.3027	0.0259561	0.663937	ENST00000236147	SELL	1	6402	uc001ggk.3	SELL	protein_coding	169690667	169711698	38.85
ENSG00000172809	14330.4	-0.517858	0.203293	7.29228	0.0260917	0.663937	ENST00000439590	RPL38	17	NA	uc002jka.3	RPL38	protein_coding	74203582	74210655	48.98
ENSG00000051523	27441.4	-0.301161	0.128562	7.27916	0.0262634	0.663937	ENST00000261623	CYBA	16	1535	uc002flb.4	CYBA	protein_coding	88643283	88651152	61.89
ENSG00000198712	158433	-0.456422	0.175857	7.26525	0.0264467	0.663937	ENST00000361739	MT-CO2	MT	4513		MT-CO2	protein_coding	7586	8269	46.2
ENSG00000213983	8797.92	-0.101188	0.164219	7.26364	0.0264679	0.663937	ENST00000308724	AP1G2	14	8906	uc001wkl.3	AP1G2	protein_coding	23559565	23568070	55.18
ENSG00000224668	3.10642	-3.81432	2.62096	7.26267	0.0264808	NA	ENST00000455509	IPO8P1	1	NA		IPO8P1	processed_pseudogene	210859177	210862285	39.5
ENSG00000170160	3.60513	-9.95481	5.09257	7.26144	0.0264971	NA	ENST00000478303	CCDC144A	17	9720		CCDC144A	protein_coding	16689537	16777881	38.37
ENSG00000119862	23.2955	21.0764	4.76302	7.24339	0.0267374	NA	ENST00000464281	LGALSL	2	29094	uc002scy.4	LGALSL	protein_coding	64453969	64461381	44.8
ENSG00000224029	16.2788	20.8956	4.96332	7.23843	0.0268037	NA	ENST00000456018		6	NA		RP11-136K14.2	sense_intronic	150624677	150626086	43.62
ENSG00000154928	5.68897	0.273944	3.05195	7.22851	0.026937	NA	ENST00000467013	EPHB1	3	2047		EPHB1	protein_coding	134597801	135260467	44.84
ENSG00000128203	464.441	0.78083	1.01686	7.22282	0.0270137	NA	ENST00000215906	ASPHD2	22	57168	uc003acg.2	ASPHD2	protein_coding	26429273	26445015	49.48
ENSG00000280123	39.7787	-8.45147	3.81779	7.2123	0.0271562	NA	ENST00000624338		8	NA		RP11-267M23.1	TEC	94427712	94429888	30.55
ENSG00000213859	650.419	0.43939	0.473337	7.20878	0.0272041	NA	ENST00000576980	KCTD11	17	147040		KCTD11	protein_coding	7351889	7354944	60.44
ENSG00000161016	72391.4	-0.407706	0.156606	7.19616	0.0273763	0.681481	ENST00000534781	RPL8	8	6132		RPL8	protein_coding	144789765	144792587	60.89
ENSG00000139132	223.469	7.44099	1.80232	7.19544	0.0273861	NA	ENST00000534526	FGD4	12	121512	uc001rlc.4	FGD4	protein_coding	32399529	32646050	40.83
ENSG00000261399	28.4776	0.72483	3.68029	7.19157	0.0274391	NA	ENST00000570022		16	101929480		LA16c-329F2.1	antisense	1713527	1714208	51.76
ENSG00000223865	49965.2	-0.380991	0.156566	7.17873	0.0276159	0.682238	ENST00000418931	HLA-DPB1	6	3115	uc003ocu.2	HLA-DPB1	protein_coding	33075926	33087201	48.11
ENSG00000262222	1416.94	-0.504381	0.331174	7.17665	0.0276447	NA	ENST00000573379		16	100505564		RP11-876N24.4	antisense	10940719	10943021	62.35
ENSG00000250848	9.78036	-1.07099	2.8204	7.16733	0.0277737	NA	ENST00000504656		5	NA		CTD-2083E4.5	processed_pseudogene	288833	290321	39.62
ENSG00000234005	25.8881	21.215	4.77594	7.15853	0.0278962	NA	ENST00000491037	GAPDHP22	13	NA		GAPDHP22	processed_pseudogene	99190579	99190991	52.06
ENSG00000261586	37.0587	14.4875	4.81884	7.15759	0.0279094	NA	ENST00000562343		12	NA		RP11-923I11.6	lincRNA	51817899	51820150	55.95
ENSG00000118513	8.00787	-1.46718	3.10966	7.15096	0.028002	NA	ENST00000341911	MYB	6	4602	uc003qfh.3	MYB	protein_coding	135181315	135219173	39.74
ENSG00000116337	2430.26	0.295965	0.307545	7.14525	0.028082	NA	ENST00000531734	AMPD2	1	271		AMPD2	protein_coding	109616104	109632051	56.74
ENSG00000248697	8.88571	3.34636	2.34129	7.14356	0.0281058	NA	ENST00000514955	TOX4P1	4	NA		TOX4P1	processed_pseudogene	112455924	112457785	49.79
ENSG00000214102	11.499	12.6382	4.83278	7.13692	0.0281993	NA	ENST00000397541	WEE2	7	494551	uc003vwn.2	WEE2	protein_coding	141708353	141731271	39.7
ENSG00000140396	3667.88	0.665027	0.280002	7.12094	0.0284255	0.688861	ENST00000452400	NCOA2	8	10499	uc003xyn.1	NCOA2	protein_coding	70109762	70403805	38.24
ENSG00000135090	4104.31	0.0934286	0.222836	7.11253	0.0285453	0.688861	ENST00000419821	TAOK3	12	51347	uc001twx.3	TAOK3	protein_coding	118149801	118372945	39.71
ENSG00000243829	373.464	-1.2115	0.50248	7.11081	0.0285699	NA	ENST00000498085		19	NA		CTB-33G10.1	processed_pseudogene	49719498	49720081	59.25
ENSG00000118898	10.355	5.1407	2.43392	7.11031	0.0285769	NA	ENST00000345988	PPL	16	5493	uc002cyd.1	PPL	protein_coding	4882507	4960741	53.44
ENSG00000162105	10.9039	-2.6501	2.81694	7.1091	0.0285943	NA	ENST00000409161	SHANK2	11	22941	uc001opz.3	SHANK2	protein_coding	70467856	71252577	51.53
ENSG00000268262	1.68529	-8.87367	5.09467	7.10027	0.0287207	NA	ENST00000601911		19	NA	uc010egm.1	CTC-246B18.8	sense_overlapping	39314651	39320858	55.3
ENSG00000181090	4760.51	0.458285	0.171723	7.09062	0.0288596	0.688861	ENST00000460843	EHMT1	9	79813	uc011mfc.2	EHMT1	protein_coding	137618963	137870016	49.25
ENSG00000140350	5792.08	-0.2836	0.143857	7.0879	0.0288989	0.688861	ENST00000465139	ANP32A	15	8125	uc002arl.3	ANP32A	protein_coding	68778535	68820897	49.39
ENSG00000100353	9706.38	-0.295966	0.114413	7.08505	0.0289402	0.688861	ENST00000216190	EIF3D	22	8664	uc003apr.3	EIF3D	protein_coding	36510850	36529436	47.04
ENSG00000243896	38.5467	-2.30997	3.30609	7.08292	0.028971	NA	ENST00000493325	OR2A7	7	401427	uc011kuc.2	OR2A7	protein_coding	144258607	144259722	48.66
ENSG00000186642	32.3035	5.14406	2.73837	7.07755	0.0290489	NA	ENST00000334456	PDE2A	11	5138	uc010rrc.2	PDE2A	protein_coding	72576141	72674591	55.35
ENSG00000279117	11.8795	-11.0694	4.56612	7.07319	0.0291123	NA	ENST00000624624		11	NA		CTD-2562J17.6	TEC	75260129	75262466	51.75
ENSG00000164331	1547.09	-0.33308	0.36382	7.05705	0.0293481	NA	ENST00000296785	ANKRA2	5	57763	uc003kcu.2	ANKRA2	protein_coding	73552335	73565686	37.28
ENSG00000263846	13.64	-3.33796	2.03895	7.05603	0.0293632	NA	ENST00000584883	CIAPIN1P	18	NA		CIAPIN1P	processed_pseudogene	26599408	26600338	50.81
ENSG00000021776	2241.96	-0.0450683	0.333835	7.05565	0.0293687	NA	ENST00000156471	AQR	15	9716	uc001ziv.3	AQR	protein_coding	34851782	34969839	37.54
ENSG00000106052	4764.22	0.342709	0.168675	7.04786	0.0294833	0.696704	ENST00000418691	TAX1BP1	7	8887		TAX1BP1	protein_coding	27739331	27844564	36.81
ENSG00000221955	3.93165	3.74515	3.86327	7.02989	0.0297494	NA	ENST00000430155	SLC12A8	3	84561	uc003eht.4	SLC12A8	protein_coding	125082636	125212864	45.27
ENSG00000229604	14.7089	-1.54009	3.28891	7.02352	0.0298443	NA	ENST00000435212	MTATP8P2	2	NA		MTATP8P2	processed_pseudogene	87824942	87825143	39.11
ENSG00000182541	2062.24	-0.876516	0.352395	7.02242	0.0298607	NA	ENST00000462625	LIMK2	22	3985		LIMK2	protein_coding	31212239	31280080	47.35
ENSG00000163126	152.43	9.37113	2.44825	7.02208	0.0298658	NA	ENST00000476975	ANKRD23	2	200539		ANKRD23	protein_coding	96824526	96857934	51.56
ENSG00000160310	3554.35	0.0273594	0.26554	7.00623	0.0301035	0.703342	ENST00000355680	PRMT2	21	3275	uc002zjx.4	PRMT2	protein_coding	46635167	46665124	45.52
ENSG00000221949	12.4796	-10.2428	4.25065	6.99868	0.0302174	NA	ENST00000408887	LINC01465	12	NA		LINC01465	lincRNA	62601751	62603690	58.2
ENSG00000144711	14496.1	0.362441	0.154371	6.99828	0.0302234	0.703342	ENST00000273221	IQSEC1	3	9922	uc003bxt.3	IQSEC1	protein_coding	12897220	13073117	54.36
ENSG00000153922	4670.38	0.528716	0.26357	6.98588	0.0304113	0.703342	ENST00000614616	CHD1	5	1105	uc003knf.3	CHD1	protein_coding	98853985	98928957	35.16
ENSG00000235238	223.687	0.107879	0.975576	6.98468	0.0304296	NA	ENST00000445436	SUMO2P1	6	NA		SUMO2P1	processed_pseudogene	29636060	29636343	45.42
ENSG00000092068	16.0474	0.8186	3.13533	6.9764	0.0305558	NA	ENST00000339733	SLC7A8	14	23428	uc010tnl.3	SLC7A8	protein_coding	23125295	23183674	47.13
ENSG00000228285	305.075	0.329075	0.840204	6.95646	0.0308619	NA	ENST00000447689	LYPLA2P1	6	NA		LYPLA2P1	processed_pseudogene	33365548	33366243	58.33
ENSG00000271360	8.67807	3.79196	2.39548	6.94426	0.0310508	NA	ENST00000604634		10	439951		RP11-138I18.1	antisense	11611305	11612227	69.23
ENSG00000167658	134147	-0.276564	0.107167	6.93886	0.0311347	0.704162	ENST00000600794	EEF2	19	1938		EEF2	protein_coding	3976056	3985469	59.53
ENSG00000198156	48.6791	0.990483	2.59378	6.93845	0.0311411	NA	ENST00000533640	NPIPB6	16	728741	uc010vcq.3	NPIPB6	protein_coding	28342555	28363508	46.08
ENSG00000174197	3622.76	0.807422	0.29408	6.91987	0.0314318	0.704162	ENST00000568630	MGA	15	23269		MGA	protein_coding	41621224	41773081	40.41
ENSG00000254470	1841.59	0.292021	0.415045	6.91713	0.0314749	NA	ENST00000532090	AP5B1	11	91056	uc031qbm.1	AP5B1	protein_coding	65775893	65780802	62.81
ENSG00000240652	26.8423	4.57097	1.88644	6.91355	0.0315312	NA	ENST00000474540		11	NA		RP11-832N8.1	processed_pseudogene	107908420	107908764	56.23
ENSG00000101444	1609.49	-0.545156	0.282339	6.91098	0.0315718	NA	ENST00000217426	AHCY	20	191	uc002xai.3	AHCY	protein_coding	34280268	34311802	50.38
ENSG00000279570	28.0839	-8.10979	3.48679	6.91083	0.0315742	NA	ENST00000623105		17	NA		CTD-2357A8.2	TEC	78691266	78691979	41.6
ENSG00000131127	1308.82	0.900123	0.32118	6.8925	0.0318648	NA	ENST00000366506	ZNF141	4	7700		ZNF141	protein_coding	337814	384864	40.31
ENSG00000136367	16.3445	-1.34209	2.75589	6.88141	0.0320421	NA	ENST00000419474	ZFHX2	14	85446	uc010tno.2	ZFHX2	protein_coding	23520855	23556192	52.73
ENSG00000236953	5.92974	8.47254	4.51583	6.88017	0.0320619	NA	ENST00000417513	ZDHHC20-IT1	13	NA		ZDHHC20-IT1	sense_intronic	21376977	21377874	57.91
ENSG00000177272	1132.75	0.667714	0.248617	6.86862	0.0322477	NA	ENST00000369769	KCNA3	1	3738	uc001dzv.2	KCNA3	protein_coding	110672465	110675033	57.84
ENSG00000238083	1047.79	0.0593746	0.353505	6.84743	0.0325911	NA	ENST00000576629	LRRC37A2	17	9884	uc002ikn.1	LRRC37A2	protein_coding	46511511	46555650	42.64
ENSG00000225569	7.38382	-8.43325	4.25003	6.8404	0.0327058	NA	ENST00000233836	CCT4P2	X	NA		CCT4P2	processed_pseudogene	65270913	65273019	38.54
ENSG00000057608	11093.9	0.337268	0.150917	6.83408	0.0328094	0.704162	ENST00000380191	GDI2	10	2665	uc001iil.4	GDI2	protein_coding	5765223	5842132	43.74
ENSG00000230667	9.78978	-2.83078	1.27356	6.83344	0.0328199	NA	ENST00000485873	SETSIP	1	646817	uc031uhi.1	SETSIP	protein_coding	92074533	92075441	41.14
ENSG00000204538	1.44558	-8.65244	5.09533	6.829	0.0328929	NA	ENST00000259845	PSORS1C2	6	170680	uc003nso.4	PSORS1C2	protein_coding	31137536	31139350	57.74
ENSG00000215347	16.7837	1.00475	4.074	6.81254	0.0331647	NA	ENST00000450250	SLC25A5P1	22	NA		SLC25A5P1	processed_pseudogene	42001069	42001966	50.11
ENSG00000110777	16102	0.241815	0.158618	6.80926	0.0332191	0.704162	ENST00000393067	POU2AF1	11	5450	uc001plg.4	POU2AF1	protein_coding	111352252	111455630	45.99
ENSG00000015676	3531.43	0.163475	0.252047	6.80317	0.0333204	0.704162	ENST00000355451	NUDCD3	7	23386	uc003tkz.3	NUDCD3	protein_coding	44379121	44490880	44.52
ENSG00000237296	296.834	2.10022	0.98903	6.80024	0.0333692	NA	ENST00000446662	SMG1P1	16	NA		SMG1P1	transcribed_unprocessed_pseudogene	22437008	22492220	40.34
ENSG00000131236	14572.1	-0.226532	0.123306	6.7806	0.0336986	0.704162	ENST00000372797	CAP1	1	10487	uc009vvz.3	CAP1	protein_coding	40040233	40072649	43.27
ENSG00000213731	11.9784	3.07881	4.0748	6.77302	0.0338264	NA	ENST00000395972	RAB5CP1	10	NA		RAB5CP1	processed_pseudogene	74423435	74424014	51.9
ENSG00000186635	9392.88	-0.168071	0.150307	6.77125	0.0338564	0.704162	ENST00000495878	ARAP1	11	116985		ARAP1	protein_coding	72685069	72793599	54.91
ENSG00000171681	9009.99	-0.551609	0.231992	6.76998	0.0338779	0.704162	ENST00000539659	ATF7IP	12	55729		ATF7IP	protein_coding	14365632	14502935	36.1
ENSG00000160294	5954.73	0.395692	0.243847	6.75394	0.0341508	0.704162	ENST00000467026	MCM3AP	21	8888		MCM3AP	protein_coding	46235126	46286297	47.4
ENSG00000165025	21852.2	0.323663	0.187157	6.7534	0.03416	0.704162	ENST00000375754	SYK	9	6850	uc004aqz.3	SYK	protein_coding	90801787	90898549	44.17
ENSG00000154277	9.58457	-2.48811	4.39282	6.73807	0.0344229	NA	ENST00000514924	UCHL1	4	7345		UCHL1	protein_coding	41256413	41268455	44.57
ENSG00000169967	5653.68	0.508316	0.192399	6.73586	0.0344609	0.704162	ENST00000409947	MAP3K2	2	10746	uc032obe.1	MAP3K2	protein_coding	127298730	127388465	38.69
ENSG00000269506	54.1714	0.308047	4.31759	6.73519	0.0344724	NA	ENST00000595906		4	NA		RP11-571I18.5	antisense	54059597	54061210	31.78
ENSG00000242076	771.287	-0.508453	0.54898	6.73444	0.0344854	NA	ENST00000473726	IGKV1-33	2	NA		IGKV1-33	IG_V_gene	89266494	89268506	42.72
ENSG00000170962	12.7256	-3.26665	3.67336	6.73295	0.0345111	NA	ENST00000393158	PDGFD	11	80310	uc001phq.3	PDGFD	protein_coding	103907186	104164379	37.11
ENSG00000197081	4138.94	-0.427022	0.241396	6.73254	0.0345182	0.704162	ENST00000356956	IGF2R	6	3482	uc003qta.3	IGF2R	protein_coding	159969099	160113507	45.55
ENSG00000008517	15.0046	-5.23085	3.04752	6.73214	0.0345251	NA	ENST00000325568	IL32	16	9235	uc002ctm.3	IL32	protein_coding	3065297	3082192	53.36
ENSG00000144895	3831.45	-0.547048	0.241656	6.72562	0.0346379	0.704162	ENST00000463863	EIF2A	3	83939		EIF2A	protein_coding	150546678	150584242	37.58
ENSG00000099204	9419.5	0.216418	0.143383	6.721	0.0347179	0.704162	ENST00000392952	ABLIM1	10	3983	uc031wts.1	ABLIM1	protein_coding	114431113	114685003	42.59
ENSG00000137502	8765.9	0.539367	0.218245	6.71874	0.0347572	0.704162	ENST00000533486	RAB30	11	27314	uc001ozu.4	RAB30	protein_coding	82973133	83071923	41.21
ENSG00000033867	2758.3	0.650885	0.268471	6.71727	0.0347828	0.704162	ENST00000419036	SLC4A7	3	9497	uc010hfl.4	SLC4A7	protein_coding	27372721	27484420	36.85
ENSG00000108107	47805.6	-0.413408	0.16539	6.71464	0.0348286	0.704162	ENST00000344063	RPL28	19	6158	uc002qkv.3	RPL28	protein_coding	55385345	55403250	52.88
ENSG00000169504	6037.03	0.691807	0.260259	6.70339	0.035025	0.704162	ENST00000374379	CLIC4	1	25932	uc001bjo.2	CLIC4	protein_coding	24745357	24844324	41.67
ENSG00000231466	86.7526	0.0108824	2.72746	6.70027	0.0350797	NA	ENST00000434827		22	NA		CTA-246H3.11	processed_pseudogene	25349543	25350322	41.79
ENSG00000087266	10805.4	-0.176056	0.26053	6.69269	0.0352128	0.704162	ENST00000452765	SH3BP2	4	6452	uc003gfi.4	SH3BP2	protein_coding	2793023	2841098	59.23
ENSG00000178952	4756.13	-0.528751	0.212883	6.69268	0.035213	0.704162	ENST00000313511	TUFM	16	7284	uc002drh.2	TUFM	protein_coding	28842411	28846408	55.48
ENSG00000130175	14794.1	-0.334638	0.140266	6.68698	0.0353135	0.704162	ENST00000591462	PRKCSH	19	5589	uc002mru.4	PRKCSH	protein_coding	11435288	11450968	56.85
ENSG00000260265	14.4826	20.7579	5.07206	6.68678	0.0353171	NA	ENST00000561705		4	NA		RP11-44F21.5	lincRNA	75081702	75084717	36.94
ENSG00000243716	1450.79	0.113207	0.345103	6.68652	0.0353216	NA	ENST00000415654	NPIPB5	16	100132247		NPIPB5	protein_coding	22479121	22536521	43.89
ENSG00000122406	52952.7	-0.325447	0.136597	6.68621	0.0353272	0.704162	ENST00000370321	RPL5	1	6125	uc001doz.3	RPL5	protein_coding	92832025	92841924	40.34
ENSG00000110330	2360.88	0.517439	0.287908	6.67237	0.0355724	NA	ENST00000527808	BIRC2	11	329		BIRC2	protein_coding	102347211	102378670	38.86
ENSG00000120063	6678.47	0.439317	0.186868	6.67118	0.0355935	0.704162	ENST00000439174	GNA13	17	10672	uc002jfc.3	GNA13	protein_coding	65010715	65056839	40.35
ENSG00000100029	2424.4	-0.293355	0.386253	6.64059	0.0361421	NA	ENST00000354694	PES1	22	23481	uc003aij.2	PES1	protein_coding	30576625	30607083	50.48
ENSG00000124508	4400.99	0.333399	0.387513	6.63881	0.0361744	0.704162	ENST00000469230	BTN2A2	6	10385	uc003nhs.3	BTN2A2	protein_coding	26383096	26394874	45.78
ENSG00000110315	6853.45	0.589598	0.218971	6.63119	0.0363124	0.704162	ENST00000265981	RNF141	11	50862	uc001mis.1	RNF141	protein_coding	10511678	10541230	36.1
ENSG00000185404	6163.02	-0.219276	0.218469	6.62815	0.0363677	0.704162	ENST00000444636	SP140L	2	93349	uc010fxm.1	SP140L	protein_coding	230327184	230403732	38.73
ENSG00000013573	2906.39	0.0877733	0.366098	6.62397	0.0364438	0.704162	ENST00000542838	DDX11	12	1663	uc001rjr.1	DDX11	protein_coding	31073845	31104791	52.28
ENSG00000127837	2795.36	-0.572022	0.245219	6.62127	0.0364929	0.704162	ENST00000248450	AAMP	2	14	uc002vhl.3	AAMP	protein_coding	218264123	218270257	56.53
ENSG00000226833	24.7119	0.0309541	3.77695	6.60921	0.0367137	NA	ENST00000452212		2	NA		AC097724.3	antisense	28708953	28736205	43.53
ENSG00000270558	18.6623	-24.0382	4.48385	6.60665	0.0367608	NA	ENST00000603896		5	NA		CTD-2124B8.2	processed_pseudogene	37286449	37286977	36.11
ENSG00000081237	50072.1	0.253571	0.0968096	6.60406	0.0368083	0.70607	ENST00000367379	PTPRC	1	5788		PTPRC	protein_coding	198638671	198757283	34.25
ENSG00000167261	4282.52	0.0230493	0.27277	6.58777	0.0371094	0.707683	ENST00000393847	DPEP2	16	64174	uc002eve.4	DPEP2	protein_coding	67987394	68000586	54.36
ENSG00000215861	11.1818	-7.66657	3.49388	6.5763	0.0373228	NA	ENST00000313342		1	NA		WI2-1896O14.1	unprocessed_pseudogene	149197992	149321732	40.7
ENSG00000077232	13603.6	0.402946	0.159424	6.57471	0.0373525	0.708177	ENST00000264065	DNAJC10	2	54431	uc002uow.2	DNAJC10	protein_coding	182716041	182794464	36.39
ENSG00000215529	40.1598	7.12591	2.80055	6.55801	0.0376656	NA	ENST00000400522	EFCAB8	20	NA		EFCAB8	protein_coding	32858923	32961609	46.92
ENSG00000250506	63.1861	10.4872	3.43399	6.54466	0.037918	NA	ENST00000588812	CDK3	17	NA	uc010dgt.3	CDK3	protein_coding	76000906	76005999	57.01
ENSG00000170889	48911.6	-0.405341	0.163337	6.54349	0.0379401	0.71516	ENST00000302907	RPS9	19	6203	uc002qdx.3	RPS9	protein_coding	54200742	54249003	51.79
ENSG00000188177	1597.13	0.786442	0.311743	6.54294	0.0379505	NA	ENST00000409871	ZC3H6	2	376940	uc002thq.1	ZC3H6	protein_coding	112275594	112340063	36.91
ENSG00000136875	1469.04	-0.235119	0.33221	6.5362	0.0380786	NA	ENST00000374199	PRPF4	9	9128	uc004bgx.3	PRPF4	protein_coding	113275343	113292905	42.73
ENSG00000134160	4.69708	-1.07387	2.92301	6.53062	0.0381852	NA	ENST00000397795	TRPM1	15	4308	uc001zfm.3	TRPM1	protein_coding	31001061	31161273	43.98
ENSG00000226002	47.459	17.4109	4.27067	6.5223	0.0383443	NA	ENST00000441415		7	NA		RP11-460N20.5	unprocessed_pseudogene	65084103	65100232	42.99
ENSG00000247134	14.4401	-6.13426	5.54823	6.5208	0.038373	NA	ENST00000520819		8	NA	uc003xjb.3	RP11-11N9.4	lincRNA	32996178	33044855	37.05
ENSG00000072832	64.7493	22.1168	3.69236	6.51244	0.0385337	NA	ENST00000506216	CRMP1	4	1400		CRMP1	protein_coding	5748084	5893058	48.98
ENSG00000198435	2.27898	-8.25893	5.09367	6.50919	0.0385964	NA	ENST00000356628	NRARP	9	441478	uc004cmo.2	NRARP	protein_coding	137300482	137302251	67.29
ENSG00000100100	5970.12	-0.874382	0.364995	6.50738	0.0386314	0.724006	ENST00000215912	PIK3IP1	22	113791	uc003akm.3	PIK3IP1	protein_coding	31281593	31292534	51.25
ENSG00000138073	2157.1	-0.131383	0.360926	6.50392	0.0386982	NA	ENST00000468045	PREB	2	10113		PREB	protein_coding	27130756	27134675	57.47
ENSG00000211678	37.8757	9.73105	3.37627	6.49799	0.0388132	NA	ENST00000390324	IGLJ3	22	NA		IGLJ3	IG_J_gene	22904850	22905025	61.93
ENSG00000273406	4.95058	-10.2391	4.75094	6.49647	0.0388427	NA	ENST00000608123		1	NA		RP11-114O18.1	lincRNA	120076616	120077091	42.23
ENSG00000235472	91.3498	11.8164	3.4619	6.49058	0.0389572	NA	ENST00000421800	EIF4A1P7	13	NA		EIF4A1P7	processed_pseudogene	28598833	28600052	47.79
ENSG00000215493	18.9285	-3.7934	2.73842	6.48825	0.0390027	NA	ENST00000426448		22	NA		XXbac-B562F10.11	processed_pseudogene	20450122	20451824	48.09
ENSG00000212297	13.1894	-5.80175	4.94986	6.48821	0.0390035	NA	ENST00000390995	RNU6-821P	3	NA		RNU6-821P	snRNA	198071311	198071417	42.99
ENSG00000164754	9702.19	0.417256	0.16567	6.48282	0.0391086	0.726986	ENST00000297338	RAD21	8	5885	uc003yod.3	RAD21	protein_coding	116845935	116874866	36.02
ENSG00000259746	40.8098	10.9093	3.49074	6.47766	0.0392097	NA	ENST00000559254	HSPE1P3	15	NA		HSPE1P3	processed_pseudogene	90634725	90635033	41.42
ENSG00000159388	17532.6	0.297446	0.203486	6.47631	0.0392363	0.726986	ENST00000475157	BTG2	1	7832	uc001gzq.3	BTG2	protein_coding	203305491	203309602	53.33
ENSG00000126216	2226.42	0.392016	0.285835	6.46873	0.0393853	NA	ENST00000261965	TUBGCP3	13	10426	uc001vse.2	TUBGCP3	protein_coding	112485005	112588167	42.87
ENSG00000281207	77.4832	11.2985	3.41039	6.46406	0.0394772	NA	ENST00000626479	SLFNL1-AS1	1	100507178	uc021omd.1	SLFNL1-AS1	antisense	41014590	41043890	49.97
ENSG00000166747	4535.04	0.437398	0.261978	6.46026	0.0395523	0.728701	ENST00000299980	AP1G1	16	164	uc010cgg.3	AP1G1	protein_coding	71729000	71809201	40.73
ENSG00000262691	40.53	1.30194	4.06927	6.44323	0.0398905	NA	ENST00000573063		16	NA	uc002esn.1	CTC-277H1.7	processed_transcript	67261108	67263784	45.76
ENSG00000228665	1.16436	-8.33864	5.09646	6.43556	0.0400439	NA	ENST00000434429		1	NA		RP11-20O24.1	processed_pseudogene	109030067	109030319	47.83
ENSG00000225331	102.911	11.4103	3.47469	6.42505	0.0402549	NA	ENST00000411694		21	NA		AP001055.6	lincRNA	44158740	44160076	64.55
ENSG00000183615	21.9799	0.746132	3.58322	6.42445	0.0402669	NA	ENST00000373582	FAM167B	1	84734	uc001buw.3	FAM167B	protein_coding	32247233	32248856	60.28
ENSG00000185436	1933.63	0.861837	0.334605	6.42232	0.0403099	NA	ENST00000327535	IFNLR1	1	163702	uc001bis.3	IFNLR1	protein_coding	24154157	24187959	47.37
ENSG00000231389	59806.8	-0.324755	0.135567	6.41848	0.0403872	0.729003	ENST00000419277	HLA-DPA1	6	3113	uc021ywg.1	HLA-DPA1	protein_coding	33064569	33080775	42.77
ENSG00000064419	2536.15	0.467201	0.279148	6.41519	0.0404537	0.729003	ENST00000265388	TNPO3	7	23534	uc003vol.2	TNPO3	protein_coding	128954180	129055173	39.8
ENSG00000072682	5.45391	-1.92169	4.30678	6.41133	0.0405319	NA	ENST00000401867	P4HA2	5	8974	uc003kwl.3	P4HA2	protein_coding	132191838	132295315	49.39
ENSG00000058063	4641.28	0.546077	0.206985	6.41125	0.0405335	0.729003	ENST00000323116	ATP11B	3	23200	uc003flb.3	ATP11B	protein_coding	182793500	182921635	36.02
ENSG00000086589	3136.77	0.106644	0.325954	6.40962	0.0405666	0.729003	ENST00000520132	RBM22	5	55696		RBM22	protein_coding	150690794	150701107	43.27
ENSG00000271321	7.00132	-9.14569	4.37797	6.40858	0.0405878	NA	ENST00000470691	CTAGE6	7	340307	uc003wdk.4	CTAGE6	protein_coding	143755089	143757696	41.33
ENSG00000197943	17763.2	0.378828	0.148295	6.40372	0.0406865	0.729003	ENST00000565054	PLCG2	16	5336		PLCG2	protein_coding	81739097	81962693	46.99
ENSG00000266849	1.13414	-8.30209	5.09661	6.39801	0.0408028	NA	ENST00000578837		3	NA		AC083906.2	miRNA	130096373	130096438	36.36
ENSG00000149091	1770.08	-0.349113	0.320617	6.39758	0.0408115	NA	ENST00000343674	DGKZ	11	8525	uc001nch.2	DGKZ	protein_coding	46332905	46380554	56.98
ENSG00000040531	722.833	-0.835662	0.410428	6.39404	0.0408839	NA	ENST00000046640	CTNS	17	1497	uc002fwb.3	CTNS	protein_coding	3636468	3661542	54.27
ENSG00000090776	102.188	8.99997	2.52011	6.39125	0.040941	NA	ENST00000204961	EFNB1	X	1947	uc004dxd.4	EFNB1	protein_coding	68828997	68842147	56.43
ENSG00000034713	2321.88	0.0816357	0.272076	6.38237	0.0411231	NA	ENST00000037243	GABARAPL2	16	11345	uc002fen.3	GABARAPL2	protein_coding	75566351	75577881	47.18
ENSG00000274620	16.1789	-24.4293	4.52595	6.36704	0.0414395	NA	ENST00000611988	MIR378J	17	102465136	uc032fem.1	MIR378J	miRNA	37614931	37615039	42.2
ENSG00000164330	3210.96	0.284617	0.284206	6.35918	0.0416027	0.741346	ENST00000519890	EBF1	5	1879		EBF1	protein_coding	158695916	159099761	39.97
ENSG00000162482	9.58718	-0.937352	4.30095	6.3562	0.0416647	NA	ENST00000361640	AKR7A3	1	22977	uc001bbv.1	AKR7A3	protein_coding	19282558	19289250	54.95
ENSG00000163635	2116.76	0.440774	0.352027	6.356	0.0416689	NA	ENST00000474513	ATXN7	3	6314		ATXN7	protein_coding	63864557	64003462	40.77
ENSG00000136051	9733.11	0.470776	0.185891	6.34504	0.041898	0.74255	ENST00000548195	KIAA1033	12	23325		KIAA1033	protein_coding	105107324	105169134	35.27
ENSG00000178295	2489.2	1.14408	0.426595	6.32344	0.0423528	NA	ENST00000317402	GEN1	2	348654	uc002rct.2	GEN1	protein_coding	17753858	17788941	35.87
ENSG00000160752	1778.37	-0.587037	0.341586	6.31473	0.0425377	NA	ENST00000468479	FDPS	1	2224		FDPS	protein_coding	155308748	155320666	50.48
ENSG00000171786	3.03442	1.04262	4.73447	6.30205	0.0428083	NA	ENST00000302101	NHLH1	1	4807	uc001fwa.2	NHLH1	protein_coding	160367067	160372848	50.12
ENSG00000205853	55.6649	-2.72124	2.66529	6.2977	0.0429013	NA	ENST00000382084	RFPL3S	22	NA		RFPL3S	protein_coding	32359906	32382052	42.18
ENSG00000118412	2810.46	0.533976	0.220788	6.29252	0.0430127	0.755399	ENST00000552401	CASP8AP2	6	9994	uc011dzz.2	CASP8AP2	protein_coding	89829894	89874436	42.57
ENSG00000205918	176.735	3.19627	1.35255	6.29103	0.0430447	NA	ENST00000382326	PDPK2P	16	NA		PDPK2P	transcribed_unprocessed_pseudogene	2616121	2643296	52.98
ENSG00000165125	12.4418	-2.22726	3.32526	6.29049	0.0430563	NA	ENST00000359396	TRPV6	7	55503	uc003wbx.3	TRPV6	protein_coding	142871203	142885762	51.12
ENSG00000229611	8.45857	-11.0337	5.09157	6.28609	0.0431511	NA	ENST00000412339		9	NA		RP11-390F4.10	lincRNA	6704471	6707780	48.7
ENSG00000167508	2079.78	-0.573328	0.280361	6.27545	0.0433813	NA	ENST00000565149	MVD	16	4597		MVD	protein_coding	88651935	88663161	59.29
ENSG00000259321	56.0077	10.0547	3.5134	6.27282	0.0434385	NA	ENST00000558478		14	NA		RP11-468E2.5	lincRNA	24139445	24140444	43.2
ENSG00000128272	12016.7	-0.289591	0.19375	6.27059	0.0434868	0.755399	ENST00000404241	ATF4	22	468	uc003axz.3	ATF4	protein_coding	39519695	39522685	58.94
ENSG00000143878	3289.07	-0.12957	0.338516	6.27039	0.0434912	0.755399	ENST00000272233	RHOB	2	388	uc002rdv.3	RHOB	protein_coding	20447074	20449445	57.34
ENSG00000263675	12.0594	0.245491	4.10716	6.26869	0.0435283	NA	ENST00000580821	MIR5581	1	100847010	uc031pma.1	MIR5581	miRNA	37500935	37500994	48.33
ENSG00000214485	8725.53	-0.389552	0.207839	6.26747	0.0435547	0.755399	ENST00000468161	RPL7P1	5	NA		RPL7P1	processed_pseudogene	150094302	150095048	43.51
ENSG00000167618	25.3096	-3.21783	2.74702	6.26664	0.0435729	NA	ENST00000412608	LAIR2	19	3904		LAIR2	protein_coding	54497879	54510687	49.25
ENSG00000123268	1489.08	-0.651697	0.733596	6.26238	0.0436659	NA	ENST00000552510	ATF1	12	466	uc001rww.4	ATF1	protein_coding	50763710	50821122	41.93
ENSG00000156414	7.99383	2.36977	2.98106	6.26112	0.0436934	NA	ENST00000409874	TDRD9	14	122402	uc001yom.4	TDRD9	protein_coding	103928462	104052667	42.7
ENSG00000261441	17.8687	7.00848	4.66968	6.25499	0.0438274	NA	ENST00000569473		15	NA		RP11-217B1.2	antisense	89335053	89336161	53.02
ENSG00000140406	1645.78	0.720359	0.28359	6.25469	0.0438341	NA	ENST00000267984	MESDC1	15	59274	uc002bfz.3	MESDC1	protein_coding	81000944	81005788	55.46
ENSG00000068305	4661.8	0.47671	0.201602	6.2516	0.0439018	0.755399	ENST00000560493	MEF2A	15	4205		MEF2A	protein_coding	99565417	99716466	36.86
ENSG00000171316	7678.45	0.441027	0.170818	6.24655	0.0440128	0.755399	ENST00000423902	CHD7	8	55636	uc003xue.3	CHD7	protein_coding	60678778	60868028	39.98
ENSG00000168159	2417.5	-0.662686	0.308078	6.24384	0.0440724	NA	ENST00000305943	RNF187	1	149603	uc001htb.3	RNF187	protein_coding	228487061	228495766	56.59
ENSG00000107863	863.725	2.05497	0.83173	6.23309	0.0443099	NA	ENST00000396432	ARHGAP21	10	57584	uc001isb.2	ARHGAP21	protein_coding	24583609	24723668	38.96
ENSG00000113441	6706.46	0.493069	0.213363	6.23294	0.0443134	0.756575	ENST00000395784	LNPEP	5	4012		LNPEP	protein_coding	96935394	97037515	37.19
ENSG00000259932	3.89189	-2.94573	4.66837	6.22615	0.044464	NA	ENST00000568314		15	NA		CTD-2651B20.7	sense_intronic	45198517	45199139	56.18
ENSG00000149256	107.067	8.50749	2.5014	6.21526	0.0447068	NA	ENST00000278550	TENM4	11	26011	uc001ozl.4	TENM4	protein_coding	78652831	79440948	44.45
ENSG00000249459	201.418	5.85645	1.75177	6.21474	0.0447185	NA	ENST00000285274	ZNF286B	17	729288	uc010vyd.2	ZNF286B	protein_coding	18658429	18682262	42.4
ENSG00000233254	36.116	3.2557	2.69985	6.21287	0.0447602	NA	ENST00000453468	RPL21P134	X	NA		RPL21P134	processed_pseudogene	75384346	75384828	41.82
ENSG00000225523	15.3019	-23.9085	4.55114	6.20743	0.0448821	NA	ENST00000436451	IGKV6D-21	2	NA		IGKV6D-21	IG_V_gene	90021567	90022185	43.62
ENSG00000198399	12623.3	0.287819	0.138854	6.20531	0.0449298	0.761762	ENST00000478720	ITSN2	2	50618		ITSN2	protein_coding	24202864	24360714	39.9
ENSG00000237286	90.2622	7.60167	2.59762	6.20475	0.0449424	NA	ENST00000423194		7	NA		AC004906.3	antisense	2944035	2947091	47.73
ENSG00000162772	33.8268	1.6898	4.09492	6.20059	0.045036	NA	ENST00000366981	ATF3	1	467	uc001hjf.3	ATF3	protein_coding	212565334	212620777	43.16
ENSG00000268027	2087.76	-0.25705	0.350582	6.19446	0.0451741	NA	ENST00000595649		19	NA		AC006129.2	lincRNA	41545192	41555462	41.63
ENSG00000142541	54976.9	-0.312855	0.136242	6.19304	0.0452063	0.761762	ENST00000391857	RPL13A	19	23521	uc002pny.4	RPL13A	protein_coding	49487554	49492308	53.4
ENSG00000175130	3052.91	-0.761165	0.324136	6.1881	0.045318	0.761762	ENST00000329421	MARCKSL1	1	65108	uc001bvd.4	MARCKSL1	protein_coding	32333832	32336379	64.21
ENSG00000199568	1.01031	-8.13387	5.09735	6.18508	0.0453866	NA	ENST00000362698	RNU5A-1	15	26831	uc032chj.1	RNU5A-1	snRNA	65296051	65296166	41.38
ENSG00000105656	1110.19	0.498106	0.361324	6.17963	0.0455105	NA	ENST00000262809	ELL	19	8178	uc002njh.3	ELL	protein_coding	18442663	18522127	55.52
ENSG00000198901	216.549	1.44345	1.20585	6.17694	0.0455717	NA	ENST00000394249	PRC1	15	9055	uc002bqm.4	PRC1	protein_coding	90966038	90995629	45.15
ENSG00000258210	8.87185	0.0119931	5.73156	6.1683	0.045769	NA	ENST00000550231		12	NA		RP11-478C19.2	processed_transcript	110387463	110445548	45.85
ENSG00000203279	44.8596	-0.493489	3.58586	6.16753	0.0457865	NA	ENST00000607322		9	NA	uc010msl.1	RP11-498P14.5	lincRNA	97200475	97238700	41.52
ENSG00000188873	106.675	0.228584	1.04798	6.16224	0.0459077	NA	ENST00000479243	RPL10AP2	8	NA		RPL10AP2	processed_pseudogene	47157118	47157771	49.69
ENSG00000228292	0.986891	-8.10202	5.09749	6.15638	0.0460425	NA	ENST00000404812		9	NA		RP11-220I1.4	processed_pseudogene	37205112	37205368	42.8
ENSG00000001629	2434.11	0.443242	0.382642	6.15546	0.0460636	NA	ENST00000265742	ANKIB1	7	54467	uc003ulw.2	ANKIB1	protein_coding	92246234	92401384	36.77
ENSG00000127152	33.6369	-0.346067	3.22432	6.15382	0.0461015	NA	ENST00000357195	BCL11B	14	64919	uc001yga.4	BCL11B	protein_coding	99169287	99271524	50.77
ENSG00000173821	16434.3	0.452227	0.233914	6.15261	0.0461293	0.771424	ENST00000508628	RNF213	17	57674	uc021uen.2	RNF213	protein_coding	80260866	80398786	49.93
ENSG00000244052	13.2987	-7.3194	3.5088	6.13414	0.0465573	NA	ENST00000463742	RPL5P24	8	NA		RPL5P24	processed_pseudogene	102923371	102924255	42.82
ENSG00000258477	3.46723	3.57759	2.55058	6.12769	0.0467076	NA	ENST00000557078	PPIAP6	14	NA		PPIAP6	processed_pseudogene	68421698	68422196	47.49
ENSG00000172340	1664.28	-0.0659535	0.398742	6.11691	0.0469602	NA	ENST00000493112	SUCLG2	3	8801	uc021xae.1	SUCLG2	protein_coding	67360460	67654614	39.38
ENSG00000074706	19.195	-8.02092	3.9176	6.11672	0.0469646	NA	ENST00000470622	IPCEF1	6	26034		IPCEF1	protein_coding	154154496	154356792	40.14
ENSG00000162512	65.4424	8.88512	3.35452	6.10778	0.047175	NA	ENST00000336798	SDC3	1	9672	uc001bsd.2	SDC3	protein_coding	30869467	30908761	55.72
ENSG00000108587	2159.42	0.500078	0.227534	6.10659	0.0472032	NA	ENST00000225724	GOSR1	17	9527	uc002hfe.3	GOSR1	protein_coding	30477362	30527592	39.72
ENSG00000142330	2439.28	0.249714	0.276015	6.10611	0.0472145	NA	ENST00000391984	CAPN10	2	11132	uc002vzk.2	CAPN10	protein_coding	240586716	240617705	54.59
ENSG00000228403	45.0277	9.71814	3.51448	6.10322	0.0472828	NA	ENST00000423256		10	NA		RP11-563N6.6	sense_intronic	48878022	48878649	51.27
ENSG00000178162	16.4137	0.880901	3.78497	6.0748	0.0479594	NA	ENST00000424873	FAR2P2	2	NA	uc002trf.3	FAR2P2	transcribed_unprocessed_pseudogene	130416755	130431363	40.63
ENSG00000135316	5878.75	0.528263	0.209433	6.06475	0.0482011	0.791598	ENST00000355238	SYNCRIP	6	10492	uc003pkv.3	SYNCRIP	protein_coding	85607785	85643792	40.05
ENSG00000095015	13332.9	0.281992	0.150183	6.06157	0.0482776	0.791598	ENST00000399503	MAP3K1	5	4214	uc003jqw.4	MAP3K1	protein_coding	56815574	56896152	38.07
ENSG00000101421	4827.44	0.166712	0.205933	6.06064	0.0483002	0.791598	ENST00000217402	CHMP4B	20	128866	uc002xaa.3	CHMP4B	protein_coding	33811304	33854366	46.43
ENSG00000211897	5688.04	1.16339	0.504197	6.05688	0.048391	0.791598	ENST00000390551	IGHG3	14	NA		IGHG3	IG_C_gene	105769102	106038345	48.99
ENSG00000113532	1926.83	0.619504	0.241104	6.05352	0.0484723	NA	ENST00000231461	ST8SIA4	5	7903	uc003knk.4	ST8SIA4	protein_coding	100806935	100903266	34.12
ENSG00000241282	2.33104	-4.44439	2.31395	6.04425	0.0486976	NA	ENST00000486062	RPL34P33	19	NA		RPL34P33	processed_pseudogene	22699352	22699685	44.61
ENSG00000087448	1135.61	1.39366	0.566642	6.03769	0.0488576	NA	ENST00000381271	KLHL42	12	57542	uc001rij.3	KLHL42	protein_coding	27780020	27803040	43.03
ENSG00000233328	236.157	-0.37413	0.828688	6.03766	0.0488584	NA	ENST00000442087	PFN1P1	1	NA		PFN1P1	processed_pseudogene	171670517	171670939	56.03
ENSG00000211668	2215.75	-0.0997235	0.609979	6.03714	0.0488711	NA	ENST00000390314	IGLV2-11	22	NA		IGLV2-11	IG_V_gene	22792491	22793007	58.03
ENSG00000143924	7453.14	0.349081	0.188351	6.0353	0.048916	0.791598	ENST00000318522	EML4	2	27436	uc002rsi.3	EML4	protein_coding	42169350	42332548	38.02
ENSG00000117009	2523.14	0.936278	0.364708	6.02611	0.0491414	0.791598	ENST00000366558	KMO	1	8564	uc009xgp.3	KMO	protein_coding	241532134	241595642	38
ENSG00000214367	1732.64	0.597843	0.301222	6.02483	0.0491727	NA	ENST00000506763	HAUS3	4	79441	uc011bvj.1	HAUS3	protein_coding	2227464	2242164	37.25
ENSG00000237846	111.031	5.52982	2.10767	6.02286	0.0492213	NA	ENST00000414297		9	NA		RP11-216M21.1	processed_pseudogene	40105822	40106527	63.46
ENSG00000244671	12.9251	-24.4582	4.59189	6.01243	0.0494786	NA	ENST00000496490	RN7SL280P	22	NA		RN7SL280P	misc_RNA	21722895	21723182	52.78
ENSG00000134061	5399.44	0.538064	0.273932	6.00325	0.0497063	0.791598	ENST00000256447	CD180	5	4064	uc003juy.2	CD180	protein_coding	67179613	67196799	42.96
ENSG00000029363	10302.7	0.239997	0.143545	6.00285	0.0497163	0.791598	ENST00000531224	BCLAF1	6	9774	uc011ede.1	BCLAF1	protein_coding	136256863	136289851	35.61
ENSG00000225695	209.228	0.262408	0.65254	5.99959	0.0497973	NA	ENST00000429216	HNRNPA1P35	2	NA		HNRNPA1P35	processed_pseudogene	201063089	201064051	46.63
ENSG00000176155	1238.02	0.572975	0.404538	5.99743	0.049851	NA	ENST00000584717	CCDC57	17	284001		CCDC57	protein_coding	82101460	82212830	51.82
ENSG00000254709	4250.44	0.404604	0.408838	5.99623	0.049881	0.791598	ENST00000526893	IGLL5	22	100423062	uc011aiw.2	IGLL5	protein_coding	22734620	22896107	45.55
ENSG00000100227	4295.94	-0.463417	0.206329	5.99575	0.0498931	0.791598	ENST00000445215	POLDIP3	22	84271	uc003bcu.4	POLDIP3	protein_coding	42583721	42614962	49.1
ENSG00000260735	15.6089	-24.3606	4.64589	5.99275	0.0499678	NA	ENST00000569858		16	100505915		RP11-72I8.1	antisense	15094411	15109197	47.01
ENSG00000167515	1056.89	-0.167429	0.346992	5.99189	0.0499894	NA	ENST00000564365	TRAPPC2L	16	51693		TRAPPC2L	protein_coding	88856220	88862686	58.39

## Sheet: Supplementary table 5
Supplementary table 5. Differentially expressed genes (FDR 5%) between healthy controls, JIA patients without uveitis and JIA patients with uveitis
Gene (hgnc)	Ensemble gene ID	Log2Fold change	p-adj
TXNIP	ENST00000582401	-1.16	9500000000
CCND3	ENST00000372991	-1.42	0.00105488
RPL24	ENST00000464595	-1.06	0.0239402
TP53INP1	ENST00000448464	-0.51	0.0239402
RHOQ	ENST00000465198	1.03	0.0239402
RPLP0	ENST00000392514	-0.52	0.0272807

## Sheet: Supplementary table 6
Supplementary Table 6. List of 614 differentially expressed genes (LRT P<0.05) and the three overarching clusters from Figure 1E
Ensemble ID	Gene Name	Cluster
ENSG00000008517	IL32	1
ENSG00000019582	CD74	1
ENSG00000051523	CYBA	1
ENSG00000061918	GUCY1B3	1
ENSG00000063177	RPL18	1
ENSG00000066923	STAG3	1
ENSG00000077150	NFKB2	1
ENSG00000080546	SESN1	1
ENSG00000084070	SMAP2	1
ENSG00000089157	RPLP0	1
ENSG00000100100	PIK3IP1	1
ENSG00000100227	POLDIP3	1
ENSG00000100316	RPL3	1
ENSG00000100353	EIF3D	1
ENSG00000105401	CDC37	1
ENSG00000107521	HPS1	1
ENSG00000108107	RPL28	1
ENSG00000109906	ZBTB16	1
ENSG00000112576	CCND3	1
ENSG00000114391	RPL24	1
ENSG00000114942	EEF1B2	1
ENSG00000116478	HDAC1	1
ENSG00000122406	RPL5	1
ENSG00000124767	GLO1	1
ENSG00000126353	CCR7	1
ENSG00000126822	PLEKHG3	1
ENSG00000127837	AAMP	1
ENSG00000131469	RPL27	1
ENSG00000131652	THOC6	1
ENSG00000131724	IL13RA1	1
ENSG00000133835	HSD17B4	1
ENSG00000134962	KLB	1
ENSG00000142534	RPS11	1
ENSG00000142541	RPL13A	1
ENSG00000147140	NONO	1
ENSG00000147403	RPL10	1
ENSG00000148795	CYP17A1	1
ENSG00000149091	DGKZ	1
ENSG00000149273	RPS3	1
ENSG00000149557	FEZ1	1
ENSG00000150687	PRSS23	1
ENSG00000155962	CLIC2	1
ENSG00000156508	EEF1A1	1
ENSG00000156711	MAPK13	1
ENSG00000158856	DMTN	1
ENSG00000161016	RPL8	1
ENSG00000162511	LAPTM5	1
ENSG00000162747	FCGR3B	1
ENSG00000164587	RPS14	1
ENSG00000164938	TP53INP1	1
ENSG00000167601	AXL	1
ENSG00000167658	EEF2	1
ENSG00000168028	RPSA	1
ENSG00000168209	DDIT4	1
ENSG00000169184	MN1	1
ENSG00000170315	UBB	1
ENSG00000170889	RPS9	1
ENSG00000171681	ATF7IP	1
ENSG00000172116	CD8B	1
ENSG00000172183	ISG20	1
ENSG00000172809	RPL38	1
ENSG00000173156	RHOD	1
ENSG00000174444	RPL4	1
ENSG00000175061	LRRC75A-AS1	1
ENSG00000175130	MARCKSL1	1
ENSG00000178952	TUFM	1
ENSG00000178980	SEPW1	1
ENSG00000182057	OGFRP1	1
ENSG00000182541	LIMK2	1
ENSG00000182774	RPS17	1
ENSG00000185986	SDHAP3	1
ENSG00000186280	KDM4D	1
ENSG00000186635	ARAP1	1
ENSG00000188693	CYP51A1-AS1	1
ENSG00000196159	FAT4	1
ENSG00000198435	NRARP	1
ENSG00000198712	MT-CO2	1
ENSG00000198755	RPL10A	1
ENSG00000198911	SREBF2	1
ENSG00000199568	RNU5A-1	1
ENSG00000199875		1
ENSG00000201863		1
ENSG00000204538	PSORS1C2	1
ENSG00000204628	GNB2L1	1
ENSG00000207440	RNU6-541P	1
ENSG00000212297	RNU6-821P	1
ENSG00000213131	YWHAZP4	1
ENSG00000213362	FTH1P12	1
ENSG00000213442	RPL18AP3	1
ENSG00000213553	RPLP0P6	1
ENSG00000213860	RPL21P75	1
ENSG00000214485	RPL7P1	1
ENSG00000215021	PHB2	1
ENSG00000215381		1
ENSG00000215861		1
ENSG00000220583	RPL35P2	1
ENSG00000220842		1
ENSG00000221949	LINC01465	1
ENSG00000223865	HLA-DPB1	1
ENSG00000224114		1
ENSG00000224668	IPO8P1	1
ENSG00000225178	RPSAP56	1
ENSG00000226828		1
ENSG00000228019		1
ENSG00000228205		1
ENSG00000228253	MT-ATP8	1
ENSG00000228292		1
ENSG00000228665		1
ENSG00000229251	HNRNPA1P8	1
ENSG00000229611		1
ENSG00000230667	SETSIP	1
ENSG00000231389	HLA-DPA1	1
ENSG00000236552	RPL13AP5	1
ENSG00000240669		1
ENSG00000241282	RPL34P33	1
ENSG00000241907	RPS20P4	1
ENSG00000243829		1
ENSG00000243896	OR2A7	1
ENSG00000244313		1
ENSG00000246526		1
ENSG00000248202		1
ENSG00000248774		1
ENSG00000249753		1
ENSG00000250222		1
ENSG00000253132	IGHV3-62	1
ENSG00000255725	TDGP1	1
ENSG00000255753		1
ENSG00000257616		1
ENSG00000259704		1
ENSG00000260572		1
ENSG00000260735		1
ENSG00000261612	SUB1P3	1
ENSG00000261744		1
ENSG00000262370		1
ENSG00000263846	CIAPIN1P	1
ENSG00000265123	RN7SL200P	1
ENSG00000265972	TXNIP	1
ENSG00000266849		1
ENSG00000267534	S1PR2	1
ENSG00000268262		1
ENSG00000270503		1
ENSG00000271788		1
ENSG00000272386		1
ENSG00000272832		1
ENSG00000273406		1
ENSG00000275294		1
ENSG00000279117		1
ENSG00000279570		1
ENSG00000280985		1
ENSG00000281849		1
ENSG00000011009	LYPLA2	2
ENSG00000013275	PSMC4	2
ENSG00000013573	DDX11	2
ENSG00000038274	MAT2B	2
ENSG00000040531	CTNS	2
ENSG00000057252	SOAT1	2
ENSG00000065802	ASB1	2
ENSG00000067560	RHOA	2
ENSG00000072682	P4HA2	2
ENSG00000074706	IPCEF1	2
ENSG00000083312	TNPO1	2
ENSG00000087087	SRRT	2
ENSG00000087266	SH3BP2	2
ENSG00000087903	RFX2	2
ENSG00000088298	EDEM2	2
ENSG00000090861	AARS	2
ENSG00000091262	ABCC6	2
ENSG00000099204	ABLIM1	2
ENSG00000100029	PES1	2
ENSG00000100591	AHSA1	2
ENSG00000100934	SEC23A	2
ENSG00000101367	MAPRE1	2
ENSG00000101997	CCDC22	2
ENSG00000103275	UBE2I	2
ENSG00000104901	DKKL1	2
ENSG00000104921	FCER2	2
ENSG00000105219	CNTD2	2
ENSG00000105711	SCN1B	2
ENSG00000106397	PLOD3	2
ENSG00000106686	SPATA6L	2
ENSG00000108389	MTMR4	2
ENSG00000112280	COL9A1	2
ENSG00000115207	GTF3C2	2
ENSG00000116221	MRPL37	2
ENSG00000116337	AMPD2	2
ENSG00000117601	SERPINC1	2
ENSG00000118513	MYB	2
ENSG00000121073	SLC35B1	2
ENSG00000123009	NME2P1	2
ENSG00000123268	ATF1	2
ENSG00000124508	BTN2A2	2
ENSG00000125245	GPR18	2
ENSG00000128272	ATF4	2
ENSG00000130545	CRB3	2
ENSG00000131236	CAP1	2
ENSG00000133316	WDR74	2
ENSG00000134160	TRPM1	2
ENSG00000134255	CEPT1	2
ENSG00000135048	TMEM2	2
ENSG00000135776	ABCB10	2
ENSG00000136156	ITM2B	2
ENSG00000136875	PRPF4	2
ENSG00000138073	PREB	2
ENSG00000139132	FGD4	2
ENSG00000139644	TMBIM6	2
ENSG00000140090	SLC24A4	2
ENSG00000141258	SGSM2	2
ENSG00000144895	EIF2A	2
ENSG00000149256	TENM4	2
ENSG00000151117	TMEM86A	2
ENSG00000153048	CARHSP1	2
ENSG00000154277	UCHL1	2
ENSG00000154928	EPHB1	2
ENSG00000155066	PROM2	2
ENSG00000156261	CCT8	2
ENSG00000158301	GPRASP2	2
ENSG00000159352	PSMD4	2
ENSG00000159388	BTG2	2
ENSG00000160683	CXCR5	2
ENSG00000160752	FDPS	2
ENSG00000160856	FCRL3	2
ENSG00000162482	AKR7A3	2
ENSG00000162733	DDR2	2
ENSG00000164099	PRSS12	2
ENSG00000164330	EBF1	2
ENSG00000164331	ANKRA2	2
ENSG00000164949	GEM	2
ENSG00000165125	TRPV6	2
ENSG00000166295	ANAPC16	2
ENSG00000166747	AP1G1	2
ENSG00000167261	DPEP2	2
ENSG00000167508	MVD	2
ENSG00000167515	TRAPPC2L	2
ENSG00000167618	LAIR2	2
ENSG00000168159	RNF187	2
ENSG00000168389	MFSD2A	2
ENSG00000170962	PDGFD	2
ENSG00000171160	MORN4	2
ENSG00000171786	NHLH1	2
ENSG00000172932	ANKRD13D	2
ENSG00000174282	ZBTB4	2
ENSG00000176155	CCDC57	2
ENSG00000177710	SLC35G5	2
ENSG00000178162	FAR2P2	2
ENSG00000178996	SNX18	2
ENSG00000181085	MAPK15	2
ENSG00000183092	BEGAIN	2
ENSG00000183598	HIST2H3D	2
ENSG00000184083	FAM120C	2
ENSG00000185404	SP140L	2
ENSG00000185591	SP1	2
ENSG00000186642	PDE2A	2
ENSG00000188004	C1orf204	2
ENSG00000188404	SELL	2
ENSG00000188677	PARVB	2
ENSG00000196455	PIK3R4	2
ENSG00000197081	IGF2R	2
ENSG00000197558	SSPO	2
ENSG00000203760	CENPW	2
ENSG00000203799	CCDC162P	2
ENSG00000203875	SNHG5	2
ENSG00000205853	RFPL3S	2
ENSG00000211584	SLC48A1	2
ENSG00000211648	IGLV1-47	2
ENSG00000211668	IGLV2-11	2
ENSG00000211945	IGHV1-18	2
ENSG00000213015	ZNF580	2
ENSG00000213024	NUP62	2
ENSG00000213280		2
ENSG00000213714	FAM209B	2
ENSG00000213983	AP1G2	2
ENSG00000214102	WEE2	2
ENSG00000214203	RPS4XP1	2
ENSG00000215493		2
ENSG00000219102	HNRNPA3P12	2
ENSG00000221955	SLC12A8	2
ENSG00000224578	HNRNPA1P48	2
ENSG00000225331		2
ENSG00000225523	IGKV6D-21	2
ENSG00000225569	CCT4P2	2
ENSG00000225695	HNRNPA1P35	2
ENSG00000226002		2
ENSG00000227492		2
ENSG00000228201		2
ENSG00000228403		2
ENSG00000229162		2
ENSG00000229897	SEPT7P7	2
ENSG00000229914		2
ENSG00000230869	CTGLF10P	2
ENSG00000231128		2
ENSG00000231584	FAHD2CP	2
ENSG00000233254	RPL21P134	2
ENSG00000233503	HNRNPLP1	2
ENSG00000234176	HSPA8P1	2
ENSG00000234369	TATDN1P1	2
ENSG00000235688		2
ENSG00000236104	ZBTB22	2
ENSG00000236452		2
ENSG00000237307	SRRM1P3	2
ENSG00000237846		2
ENSG00000240376		2
ENSG00000240409	MTATP8P1	2
ENSG00000240652		2
ENSG00000240898		2
ENSG00000242076	IGKV1-33	2
ENSG00000243710	CFAP57	2
ENSG00000244021		2
ENSG00000244052	RPL5P24	2
ENSG00000244671	RN7SL280P	2
ENSG00000244693	CTAGE8	2
ENSG00000247134		2
ENSG00000248697	TOX4P1	2
ENSG00000248795		2
ENSG00000250474	WBP1LP2	2
ENSG00000253047		2
ENSG00000253159	PCDHGA12	2
ENSG00000253910	PCDHGB2	2
ENSG00000254056	IGHV3-71	2
ENSG00000254470	AP5B1	2
ENSG00000254709	IGLL5	2
ENSG00000255318		2
ENSG00000258210		2
ENSG00000259321		2
ENSG00000259479	SORD2P	2
ENSG00000259932		2
ENSG00000260018		2
ENSG00000261586		2
ENSG00000261812	TUBB8P7	2
ENSG00000262222		2
ENSG00000262434		2
ENSG00000264659		2
ENSG00000264660		2
ENSG00000267122		2
ENSG00000267784		2
ENSG00000268027		2
ENSG00000268056		2
ENSG00000268070		2
ENSG00000269102		2
ENSG00000269153	LYPLA2P2	2
ENSG00000270264	NDUFB8P2	2
ENSG00000270558		2
ENSG00000270728		2
ENSG00000271321	CTAGE6	2
ENSG00000272745		2
ENSG00000274620	MIR378J	2
ENSG00000278231		2
ENSG00000280123		2
ENSG00000280832	ST3GAL4-AS1	2
ENSG00000001629	ANKIB1	3
ENSG00000006459	KDM7A	3
ENSG00000006576	PHTF2	3
ENSG00000015171	ZMYND11	3
ENSG00000015676	NUDCD3	3
ENSG00000021776	AQR	3
ENSG00000029363	BCLAF1	3
ENSG00000033867	SLC4A7	3
ENSG00000034713	GABARAPL2	3
ENSG00000048028	USP28	3
ENSG00000057608	GDI2	3
ENSG00000058063	ATP11B	3
ENSG00000064419	TNPO3	3
ENSG00000065809	FAM107B	3
ENSG00000066294	CD84	3
ENSG00000068305	MEF2A	3
ENSG00000069966	GNB5	3
ENSG00000072832	CRMP1	3
ENSG00000074603	DPP8	3
ENSG00000075151	EIF4G3	3
ENSG00000077232	DNAJC10	3
ENSG00000081237	PTPRC	3
ENSG00000083857	FAT1	3
ENSG00000086062	B4GALT1	3
ENSG00000086570	FAT2	3
ENSG00000086589	RBM22	3
ENSG00000087448	KLHL42	3
ENSG00000088882	CPXM1	3
ENSG00000090776	EFNB1	3
ENSG00000092068	SLC7A8	3
ENSG00000095015	MAP3K1	3
ENSG00000101421	CHMP4B	3
ENSG00000101444	AHCY	3
ENSG00000104643	MTMR9	3
ENSG00000105483	CARD8	3
ENSG00000105656	ELL	3
ENSG00000105856	HBP1	3
ENSG00000105926	MPP6	3
ENSG00000106052	TAX1BP1	3
ENSG00000106069	CHN2	3
ENSG00000106538	RARRES2	3
ENSG00000107863	ARHGAP21	3
ENSG00000108219	TSPAN14	3
ENSG00000108587	GOSR1	3
ENSG00000109436	TBC1D9	3
ENSG00000110315	RNF141	3
ENSG00000110330	BIRC2	3
ENSG00000110777	POU2AF1	3
ENSG00000111837	MAK	3
ENSG00000111913	FAM65B	3
ENSG00000113441	LNPEP	3
ENSG00000113532	ST8SIA4	3
ENSG00000114439	BBX	3
ENSG00000115020	PIKFYVE	3
ENSG00000115170	ACVR1	3
ENSG00000115956	PLEK	3
ENSG00000116191	RALGPS2	3
ENSG00000116406	EDEM3	3
ENSG00000116514	RNF19B	3
ENSG00000117009	KMO	3
ENSG00000118307	CASC1	3
ENSG00000118308	LRMP	3
ENSG00000118412	CASP8AP2	3
ENSG00000118898	PPL	3
ENSG00000119285	HEATR1	3
ENSG00000119729	RHOQ	3
ENSG00000119862	LGALSL	3
ENSG00000120063	GNA13	3
ENSG00000120963	ZNF706	3
ENSG00000121101	TEX14	3
ENSG00000122786	CALD1	3
ENSG00000126216	TUBGCP3	3
ENSG00000127152	BCL11B	3
ENSG00000127947	PTPN12	3
ENSG00000128203	ASPHD2	3
ENSG00000130175	PRKCSH	3
ENSG00000130382	MLLT1	3
ENSG00000131127	ZNF141	3
ENSG00000131747	TOP2A	3
ENSG00000132128	LRRC41	3
ENSG00000133789	SWAP70	3
ENSG00000134061	CD180	3
ENSG00000134278	SPIRE1	3
ENSG00000135090	TAOK3	3
ENSG00000135316	SYNCRIP	3
ENSG00000135519	KCNH3	3
ENSG00000136040	PLXNC1	3
ENSG00000136051	KIAA1033	3
ENSG00000136367	ZFHX2	3
ENSG00000137502	RAB30	3
ENSG00000138101	DTNB	3
ENSG00000138593	SECISBP2L	3
ENSG00000140350	ANP32A	3
ENSG00000140391	TSPAN3	3
ENSG00000140396	NCOA2	3
ENSG00000140406	MESDC1	3
ENSG00000140525	FANCI	3
ENSG00000141522	ARHGDIA	3
ENSG00000142197	DOPEY2	3
ENSG00000142330	CAPN10	3
ENSG00000143297	FCRL5	3
ENSG00000143878	RHOB	3
ENSG00000143924	EML4	3
ENSG00000144118	RALB	3
ENSG00000144711	IQSEC1	3
ENSG00000145246	ATP10D	3
ENSG00000145725	PPIP5K2	3
ENSG00000146757	ZNF92	3
ENSG00000149483	TMEM138	3
ENSG00000153922	CHD1	3
ENSG00000155657	TTN	3
ENSG00000156414	TDRD9	3
ENSG00000156738	MS4A1	3
ENSG00000158865	SLC5A11	3
ENSG00000159208	CIART	3
ENSG00000159231	CBR3	3
ENSG00000159648	TEPP	3
ENSG00000160282	FTCD	3
ENSG00000160294	MCM3AP	3
ENSG00000160310	PRMT2	3
ENSG00000162105	SHANK2	3
ENSG00000162512	SDC3	3
ENSG00000162772	ATF3	3
ENSG00000162980	ARL5A	3
ENSG00000163126	ANKRD23	3
ENSG00000163349	HIPK1	3
ENSG00000163635	ATXN7	3
ENSG00000163939	PBRM1	3
ENSG00000164344	KLKB1	3
ENSG00000164530	PI16	3
ENSG00000164638	SLC29A4	3
ENSG00000164754	RAD21	3
ENSG00000164855	TMEM184A	3
ENSG00000164941	INTS8	3
ENSG00000165025	SYK	3
ENSG00000165794	SLC39A2	3
ENSG00000166340	TPP1	3
ENSG00000166532	RIMKLB	3
ENSG00000166783	KIAA0430	3
ENSG00000167103	PIP5KL1	3
ENSG00000167306	MYO5B	3
ENSG00000168214	RBPJ	3
ENSG00000168438	CDC40	3
ENSG00000169045	HNRNPH1	3
ENSG00000169504	CLIC4	3
ENSG00000169508	GPR183	3
ENSG00000169554	ZEB2	3
ENSG00000169967	MAP3K2	3
ENSG00000170128	GPR25	3
ENSG00000170160	CCDC144A	3
ENSG00000170471	RALGAPB	3
ENSG00000170638	TRABD	3
ENSG00000171316	CHD7	3
ENSG00000171812	COL8A2	3
ENSG00000172340	SUCLG2	3
ENSG00000173821	RNF213	3
ENSG00000173825	TIGD3	3
ENSG00000174197	MGA	3
ENSG00000174527	MYO1H	3
ENSG00000175514	GPR152	3
ENSG00000175893	ZDHHC21	3
ENSG00000176623	RMDN1	3
ENSG00000176953	NFATC2IP	3
ENSG00000177272	KCNA3	3
ENSG00000178295	GEN1	3
ENSG00000178971	CTC1	3
ENSG00000179456	ZBTB18	3
ENSG00000180398	MCFD2	3
ENSG00000181090	EHMT1	3
ENSG00000182180	MRPS16	3
ENSG00000183022	TPM3P8	3
ENSG00000183615	FAM167B	3
ENSG00000184445	KNTC1	3
ENSG00000185436	IFNLR1	3
ENSG00000185946	RNPC3	3
ENSG00000186432	KPNA4	3
ENSG00000188177	ZC3H6	3
ENSG00000188873	RPL10AP2	3
ENSG00000188906	LRRK2	3
ENSG00000196628	TCF4	3
ENSG00000196664	TLR7	3
ENSG00000197321	SVIL	3
ENSG00000197629	MPEG1	3
ENSG00000197943	PLCG2	3
ENSG00000198156	NPIPB6	3
ENSG00000198399	ITSN2	3
ENSG00000198590	C3orf35	3
ENSG00000198743	SLC5A3	3
ENSG00000198901	PRC1	3
ENSG00000203279		3
ENSG00000205918	PDPK2P	3
ENSG00000211678	IGLJ3	3
ENSG00000211897	IGHG3	3
ENSG00000213051	RPL5P5	3
ENSG00000213057	C1orf220	3
ENSG00000213731	RAB5CP1	3
ENSG00000213859	KCTD11	3
ENSG00000214013	GANC	3
ENSG00000214367	HAUS3	3
ENSG00000215347	SLC25A5P1	3
ENSG00000215529	EFCAB8	3
ENSG00000218418		3
ENSG00000223356		3
ENSG00000223984	HNRNPRP1	3
ENSG00000224029		3
ENSG00000225447	RPS15AP10	3
ENSG00000226833		3
ENSG00000227077		3
ENSG00000228050	TOP3BP1	3
ENSG00000228285	LYPLA2P1	3
ENSG00000229196		3
ENSG00000229204	PTGES3P3	3
ENSG00000229604	MTATP8P2	3
ENSG00000230592	RPSAP8	3
ENSG00000230756	RHOQP3	3
ENSG00000231043		3
ENSG00000231064		3
ENSG00000231466		3
ENSG00000233155	HMGA1P8	3
ENSG00000233328	PFN1P1	3
ENSG00000233837	EIF3LP2	3
ENSG00000234005	GAPDHP22	3
ENSG00000235238	SUMO2P1	3
ENSG00000235472	EIF4A1P7	3
ENSG00000235587	GAPDHP65	3
ENSG00000236953	ZDHHC20-IT1	3
ENSG00000237286		3
ENSG00000237296	SMG1P1	3
ENSG00000238083	LRRC37A2	3
ENSG00000239911	PRKAG2-AS1	3
ENSG00000240563	L1TD1	3
ENSG00000241255		3
ENSG00000243431	RPL5P30	3
ENSG00000243716	NPIPB5	3
ENSG00000244617	ASPRV1	3
ENSG00000245532	NEAT1	3
ENSG00000246560		3
ENSG00000249244		3
ENSG00000249459	ZNF286B	3
ENSG00000250506	CDK3	3
ENSG00000250848		3
ENSG00000251495	PPIAP11	3
ENSG00000253209	IGHV3-65	3
ENSG00000255220	DDX18P5	3
ENSG00000255224		3
ENSG00000258477	PPIAP6	3
ENSG00000258613	RPL21P7	3
ENSG00000258947	TUBB3	3
ENSG00000259144	RANBP20P	3
ENSG00000259746	HSPE1P3	3
ENSG00000260265		3
ENSG00000260571	BNIP3P5	3
ENSG00000261399		3
ENSG00000261441		3
ENSG00000262691		3
ENSG00000263675	MIR5581	3
ENSG00000266993		3
ENSG00000268222	EEF1A1P7	3
ENSG00000269506		3
ENSG00000271360		3
ENSG00000272977		3
ENSG00000277363	SRCIN1	3
ENSG00000277692		3
ENSG00000278917		3
ENSG00000280353		3
ENSG00000281207	SLFNL1-AS1	3

## Sheet: Supplementary table 7
Supplementary Table 7. Differentially expressed genes (387) between JIA patients without uveitis and JIA patients with uveitis
Ensemble Gene ID	baseMean	log2FoldChange	lfcSE	stat	pvalue	padj	ensembl_transcript_id	hgnc_symbol	chromosome_name	entrezgene	ucsc	external_gene_name	gene_biotype	start_position	end_position	percentage_gc_content
ENSG00000015171	3122.21	0.593136	0.142495	4.16249	3.14798e-05	0.873251	ENST00000439456	ZMYND11	10	10771		ZMYND11	protein_coding	134465	254637	37.8
ENSG00000213024	3357.39	-0.483106	0.13026	-3.70879	0.000208255	1	ENST00000422090	NUP62	19	23636	uc002pqz.4	NUP62	protein_coding	49906825	49929763	54.29
ENSG00000234369	61.984	-0.689931	0.186723	-3.69494	0.000219936	1	ENST00000414123	TATDN1P1	10			TATDN1P1	processed_pseudogene	63222155	63223045	35.8
ENSG00000214203	24.994	-0.719873	0.198277	-3.63064	0.000282724	1	ENST00000482189	RPS4XP1	12			RPS4XP1	processed_pseudogene	100009052	100009838	45.62
ENSG00000114439	5791.76	0.353894	0.098387	3.59696	0.000321962	1	ENST00000415149	BBX	3	56987	uc003dwk.5	BBX	protein_coding	107522936	107811324	36.95
ENSG00000144118	2648.84	0.579456	0.162094	3.57481	0.000350478	1	ENST00000447591	RALB	2	5899	uc010yys.2	RALB	protein_coding	120240064	120294713	46.37
ENSG00000057252	1029.48	-0.646615	0.184818	-3.49866	0.000467599	1	ENST00000367619	SOAT1	1	6646	uc001gml.3	SOAT1	protein_coding	179293714	179358680	39.63
ENSG00000067560	17094.9	-0.229148	0.0669359	-3.42339	0.000618458	1	ENST00000418115	RHOA	3	387	uc003cwu.3	RHOA	protein_coding	49359145	49412998	46.57
ENSG00000112576	6342.93	-0.546416	0.161548	-3.38238	0.000718595	1	ENST00000372991	CCND3	6	896	uc003orn.4	CCND3	protein_coding	41934933	42050357	47.06
ENSG00000227077	98.3937	0.755642	0.226856	3.33093	0.000865574	1	ENST00000442562	#N/A	17		uc032ewx.1	AC107983.4	processed_pseudogene	18572752	18572961	62.38
ENSG00000182180	1655.98	0.506108	0.152361	3.32176	0.000894518	1	ENST00000479005	MRPS16	10	51021	uc001jtt.1	MRPS16	protein_coding	73248843	73252693	47.47
ENSG00000213280	23.5622	-0.763022	0.229827	-3.31998	0.000900228	1	ENST00000393266	#N/A	7			RP11-212P7.1	processed_pseudogene	128570241	128570688	52.9
ENSG00000135048	4504.63	-0.457614	0.141304	-3.23852	0.00120153	1	ENST00000377044	TMEM2	9	23670	uc011lsa.1	TMEM2	protein_coding	71683366	71816690	40.46
ENSG00000105856	2368.46	0.425852	0.131904	3.2285	0.00124441	1	ENST00000468410	HBP1	7	26959	uc011klv.2	HBP1	protein_coding	107168961	107202529	37.95
ENSG00000101367	3606.43	-0.484119	0.153408	-3.15577	0.00160077	1	ENST00000375571	MAPRE1	20	22919	uc002wyh.3	MAPRE1	protein_coding	32819893	32850405	44.44
ENSG00000251495	47.2087	0.62672	0.198914	3.15071	0.00162875	1	ENST00000510729	PPIAP11	5			PPIAP11	processed_pseudogene	82009602	82010094	48.68
ENSG00000038274	6110.97	-0.375718	0.119529	-3.14332	0.00167045	1	ENST00000280969	MAT2B	5	27430	uc003lzj.4	MAT2B	protein_coding	163503114	163519336	38.25
ENSG00000114391	12289	-0.234075	0.0752945	-3.10879	0.00187855	1	ENST00000464595	RPL24	3	6152		RPL24	protein_coding	101681091	101686782	42.52
ENSG00000159352	4187.77	-0.338442	0.109384	-3.09406	0.00197438	1	ENST00000368884	PSMD4	1	5710	uc001exl.3	PSMD4	protein_coding	151254703	151267479	47.67
ENSG00000103275	5940.79	-0.288733	0.0944369	-3.05742	0.0022325	1	ENST00000355803	UBE2I	16	7329	uc002cld.2	UBE2I	protein_coding	1308880	1327018	59.46
ENSG00000069966	3966.05	0.418888	0.137187	3.05342	0.00226251	1	ENST00000261837	GNB5	15	10681	uc002abt.1	GNB5	protein_coding	52115105	52191369	45.39
ENSG00000153048	1448.97	-0.546691	0.180342	-3.0314	0.00243419	1	ENST00000396593	CARHSP1	16	23589	uc002czh.2	CARHSP1	protein_coding	8852942	8869012	55.97
ENSG00000234176	7.37194	-0.52603	0.173558	-3.03086	0.00243856	1	ENST00000425843	HSPA8P1	X			HSPA8P1	processed_pseudogene	121203182	121205014	44.08
ENSG00000184445	1794.46	0.545058	0.179962	3.02873	0.00245583	1	ENST00000535410	KNTC1	12	9735		KNTC1	protein_coding	122527246	122626396	41.24
ENSG00000185591	6175.72	-0.306648	0.101408	-3.02391	0.00249527	1	ENST00000551969	SP1	12	6667		SP1	protein_coding	53380176	53416446	45.65
ENSG00000136156	9380.47	-0.351301	0.11695	-3.00386	0.00266578	1	ENST00000378565	ITM2B	13	9445	uc001vbz.3	ITM2B	protein_coding	48233158	48270357	37.31
ENSG00000196455	1291.26	-0.560576	0.186628	-3.00372	0.00266704	1	ENST00000356763	PIK3R4	3	30849	uc003enj.3	PIK3R4	protein_coding	130678935	130746829	36.67
ENSG00000178971	11005.2	0.370289	0.12359	2.99611	0.00273449	1	ENST00000315684	CTC1	17	80169	uc002gkq.4	CTC1	protein_coding	8224821	8248044	48.84
ENSG00000101997	2116.69	-0.533066	0.178457	-2.98709	0.00281649	1	ENST00000376227	CCDC22	X	28952	uc004dnd.2	CCDC22	protein_coding	49235467	49250526	53.55
ENSG00000197558	15.5501	0.53628	0.180221	2.97568	0.00292335	1	ENST00000623373	SSPO	7	23145		SSPO	protein_coding	149776042	149833979	61.01
ENSG00000211945	2843.05	-0.577714	0.194422	-2.97145	0.00296399	1	ENST00000390605	IGHV1-18	14			IGHV1-18	IG_V_gene	106184901	106185394	56.48
ENSG00000253209	10.8743	0.559285	0.188272	2.97063	0.00297193	1	ENST00000523210	IGHV3-65	14			IGHV3-65	IG_V_pseudogene	106666092	106666532	49.89
ENSG00000236104	2005.41	-0.436244	0.147026	-2.96713	0.00300593	1	ENST00000431845	ZBTB22	6	9278	uc003oeb.3	ZBTB22	protein_coding	33314406	33317942	59.46
ENSG00000090861	2353.71	-0.534333	0.180512	-2.9601	0.00307542	1	ENST00000261772	AARS	16	16	uc002eyn.1	AARS	protein_coding	70252295	70289543	49.47
ENSG00000115207	2523.14	-0.453429	0.154672	-2.93156	0.00337262	1	ENST00000359541	GTF3C2	2	2976	uc002rju.2	GTF3C2	protein_coding	27325849	27357034	46.39
ENSG00000011009	1572.39	-0.512005	0.175473	-2.91785	0.00352452	1	ENST00000374514	LYPLA2	1	11313	uc001bht.3	LYPLA2	protein_coding	23790970	23795539	62.39
ENSG00000166295	8970.15	-0.307198	0.105406	-2.91444	0.00356329	1	ENST00000478193	ANAPC16	10	119504	uc021psq.1	ANAPC16	protein_coding	72216000	72235860	43.46
ENSG00000172932	5093.93	-0.387557	0.134956	-2.87174	0.00408224	1	ENST00000447274	ANKRD13D	11	338692	uc001oke.2	ANKRD13D	protein_coding	67288547	67302485	53.51
ENSG00000065802	2399.64	-0.425125	0.14851	-2.86261	0.00420166	1	ENST00000463352	ASB1	2	51665		ASB1	protein_coding	238426742	238452250	47.31
ENSG00000104643	1239.09	0.483228	0.169316	2.85399	0.00431732	1	ENST00000221086	MTMR9	8	66036	uc003wtm.3	MTMR9	protein_coding	11284416	11328146	37.85
ENSG00000156261	4756.73	-0.339356	0.119514	-2.83948	0.00451876	1	ENST00000432178	CCT8	21	10694		CCT8	protein_coding	29055805	29073797	38.32
ENSG00000174282	4636.99	-0.367558	0.130505	-2.81642	0.0048562	1	ENST00000380599	ZBTB4	17	57659	uc002ghc.4	ZBTB4	protein_coding	7459366	7484263	54.92
ENSG00000139644	18607.2	-0.22125	0.0793621	-2.78786	0.00530574	1	ENST00000548809	TMBIM6	12	7009		TMBIM6	protein_coding	49707725	49764934	43.42
ENSG00000083312	4092.9	-0.363161	0.130334	-2.78639	0.00532994	1	ENST00000337273	TNPO1	5	3842	uc003kck.4	TNPO1	protein_coding	72816312	72916733	37.25
ENSG00000149483	1744.15	0.479077	0.173029	2.76876	0.00562703	1	ENST00000278826	TMEM138	11	51524	uc001nrl.2	TMEM138	protein_coding	61362001	61369509	48.08
ENSG00000087087	7600.69	-0.287894	0.104274	-2.76094	0.00576351	1	ENST00000620394	SRRT	7	51593		SRRT	protein_coding	100875111	100888664	53.17
ENSG00000160683	1360.36	-0.542195	0.197349	-2.74739	0.00600714	1	ENST00000292174	CXCR5	11	643	uc001pue.4	CXCR5	protein_coding	118883766	118897799	54.19
ENSG00000188906	3706.3	0.474724	0.172805	2.74717	0.00601118	1	ENST00000416796	LRRK2	12	120892		LRRK2	protein_coding	40196744	40369285	35.24
ENSG00000130382	1989.21	0.389963	0.142361	2.73926	0.0061578	1	ENST00000585588	MLLT1	19	4298		MLLT1	protein_coding	6210379	6279948	55.57
ENSG00000127947	2614.62	0.503987	0.18423	2.73564	0.00622583	1	ENST00000248594	PTPN12	7	5782	uc003ugh.2	PTPN12	protein_coding	77537275	77640071	38.16
ENSG00000218418	7.70999	0.475267	0.174128	2.72941	0.00634482	1	ENST00000401578	#N/A	6			RP11-296E7.1	processed_pseudogene	80064286	80070199	44.37
ENSG00000141258	6690.73	-0.355905	0.130646	-2.72419	0.00644587	1	ENST00000572875	SGSM2	17	9905		SGSM2	protein_coding	2337498	2381058	54.99
ENSG00000258613	86.0556	0.4541	0.166776	2.72281	0.00647294	1	ENST00000557463	RPL21P7	14			RPL21P7	processed_pseudogene	65266638	65267690	44.92
ENSG00000231043	1853.58	0.387462	0.142949	2.7105	0.00671822	1	ENST00000434096	#N/A	2			AC007238.1	processed_pseudogene	58460292	58462032	48.19
ENSG00000211584	611.6	-0.605546	0.223584	-2.70836	0.0067616	1	ENST00000548498	SLC48A1	12	55652		SLC48A1	protein_coding	47753916	47782753	52.68
ENSG00000213859	650.419	0.565158	0.209079	2.70308	0.00686996	1	ENST00000576980	KCTD11	17	147040		KCTD11	protein_coding	7351889	7354944	60.44
ENSG00000188404	36101.3	-0.25429	0.0944097	-2.69348	0.00707106	1	ENST00000236147	SELL	1	6402	uc001ggk.3	SELL	protein_coding	169690667	169711698	38.85
ENSG00000233837	26.1049	0.499474	0.185491	2.69272	0.00708726	1	ENST00000457262	EIF3LP2	10			EIF3LP2	processed_pseudogene	42566677	42567483	49.69
ENSG00000213983	8797.92	-0.259903	0.096871	-2.68298	0.007297	1	ENST00000308724	AP1G2	14	8906	uc001wkl.3	AP1G2	protein_coding	23559565	23568070	55.18
ENSG00000176953	4888.45	0.259975	0.097703	2.66087	0.00779381	1	ENST00000564978	NFATC2IP	16	84901	uc002drt.3	NFATC2IP	protein_coding	28950807	28967097	49.47
ENSG00000135090	4104.31	0.336603	0.126581	2.65918	0.00783302	1	ENST00000419821	TAOK3	12	51347	uc001twx.3	TAOK3	protein_coding	118149801	118372945	39.71
ENSG00000128203	464.441	0.587378	0.221016	2.65763	0.00786931	1	ENST00000215906	ASPHD2	22	57168	uc003acg.2	ASPHD2	protein_coding	26429273	26445015	49.48
ENSG00000164331	1547.09	-0.482726	0.181955	-2.65299	0.00797816	1	ENST00000296785	ANKRA2	5	57763	uc003kcu.2	ANKRA2	protein_coding	73552335	73565686	37.28
ENSG00000006576	2880.48	0.314346	0.119066	2.64009	0.00828836	1	ENST00000422959	PHTF2	7	57157	uc003ugt.4	PHTF2	protein_coding	77798792	77957503	37.65
ENSG00000123009	29.1211	-0.584895	0.221914	-2.63569	0.00839661	1	ENST00000426182	NME2P1	12			NME2P1	processed_pseudogene	120282303	120282716	52.9
ENSG00000015676	3531.43	0.36679	0.139982	2.62026	0.00878623	1	ENST00000355451	NUDCD3	7	23386	uc003tkz.3	NUDCD3	protein_coding	44379121	44490880	44.52
ENSG00000106397	1115.83	-0.448106	0.17102	-2.6202	0.00878789	1	ENST00000454310	PLOD3	7	8985		PLOD3	protein_coding	101205977	101218420	58.5
ENSG00000135776	1288.85	-0.520578	0.198844	-2.61802	0.00884413	1	ENST00000344517	ABCB10	1	23456	uc001htp.4	ABCB10	protein_coding	229516582	229558695	43.62
ENSG00000185986	706.289	0.50522	0.194011	2.60408	0.00921212	1	ENST00000515467	SDHAP3	5		uc011cme.2	SDHAP3	transcribed_unprocessed_pseudogene	1572222	1594620	47.9
ENSG00000240409	19.3577	-0.561408	0.215928	-2.59998	0.00932297	1	ENST00000467115	MTATP8P1	1			MTATP8P1	unprocessed_pseudogene	633535	633741	38.16
ENSG00000242076	771.287	-0.573308	0.220722	-2.59742	0.00939268	1	ENST00000473726	IGKV1-33	2			IGKV1-33	IG_V_gene	89266494	89268506	42.72
ENSG00000132128	1619.69	0.504018	0.194183	2.59558	0.00944306	1	ENST00000496156	LRRC41	1	10489		LRRC41	protein_coding	46261196	46303608	47.41
ENSG00000133835	3563.43	-0.442092	0.170937	-2.58629	0.00970166	1	ENST00000256216	HSD17B4	5	3295	uc003ksj.3	HSD17B4	protein_coding	119452443	119637199	37.34
ENSG00000126353	6311.15	-0.404169	0.156318	-2.58555	0.00972235	1	ENST00000246657	CCR7	17	1236	uc002huw.3	CCR7	protein_coding	40553769	40565472	53.29
ENSG00000160310	3554.35	0.376771	0.145855	2.58319	0.00978916	1	ENST00000355680	PRMT2	21	3275	uc002zjx.4	PRMT2	protein_coding	46635167	46665124	45.52
ENSG00000075151	4450.99	0.294135	0.113867	2.58314	0.0097907	1	ENST00000264211	EIF4G3	1	8672	uc010odj.2	EIF4G3	protein_coding	20806292	21176888	39.36
ENSG00000087266	10805.4	-0.370539	0.143674	-2.57902	0.009908	1	ENST00000452765	SH3BP2	4	6452	uc003gfi.4	SH3BP2	protein_coding	2793023	2841098	59.23
ENSG00000243716	1450.79	0.452994	0.176007	2.57373	0.0100609	1	ENST00000415654	NPIPB5	16	100132247		NPIPB5	protein_coding	22479121	22536521	43.89
ENSG00000100029	2424.4	-0.485354	0.188592	-2.57357	0.0100655	1	ENST00000354694	PES1	22	23481	uc003aij.2	PES1	protein_coding	30576625	30607083	50.48
ENSG00000238083	1047.79	0.460072	0.178771	2.57353	0.0100667	1	ENST00000576629	LRRC37A2	17	9884	uc002ikn.1	LRRC37A2	protein_coding	46511511	46555650	42.64
ENSG00000168209	1019.16	-0.569122	0.221502	-2.56938	0.0101882	1	ENST00000307365	DDIT4	10	54541	uc001jsx.1	DDIT4	protein_coding	72273920	72276036	58.72
ENSG00000262222	1416.94	-0.439721	0.171268	-2.56744	0.0102452	1	ENST00000573379	#N/A	16	100505564		RP11-876N24.4	antisense	10940719	10943021	62.35
ENSG00000185404	6163.02	-0.318691	0.124476	-2.56026	0.0104595	1	ENST00000444636	SP140L	2	93349	uc010fxm.1	SP140L	protein_coding	230327184	230403732	38.73
ENSG00000188677	1720.97	-0.455158	0.177786	-2.56015	0.0104628	1	ENST00000406477	PARVB	22	29780	uc003bem.3	PARVB	protein_coding	43999211	44172949	50.79
ENSG00000136875	1469.04	-0.437678	0.171587	-2.55076	0.0107489	1	ENST00000374199	PRPF4	9	9128	uc004bgx.3	PRPF4	protein_coding	113275343	113292905	42.73
ENSG00000186432	3321.07	0.365702	0.143535	2.54782	0.0108397	1	ENST00000334256	KPNA4	3	3840	uc003fdn.3	KPNA4	protein_coding	160494995	160565588	37.2
ENSG00000160856	18073.8	-0.394627	0.155252	-2.54185	0.0110268	1	ENST00000457799	FCRL3	1	115352		FCRL3	protein_coding	157674321	157700857	40.64
ENSG00000211648	2059.91	-0.585237	0.23139	-2.52922	0.0114315	1	ENST00000390294	IGLV1-47	22			IGLV1-47	IG_V_gene	22357739	22358260	57.66
ENSG00000021776	2241.96	0.434515	0.172201	2.5233	0.0116258	1	ENST00000156471	AQR	15	9716	uc001ziv.3	AQR	protein_coding	34851782	34969839	37.54
ENSG00000013275	2111.78	-0.390788	0.15507	-2.52008	0.0117329	1	ENST00000157812	PSMC4	19	5704	uc002omq.4	PSMC4	protein_coding	39971005	39981441	50.25
ENSG00000086589	3136.77	0.426847	0.169427	2.51936	0.0117567	1	ENST00000520132	RBM22	5	55696		RBM22	protein_coding	150690794	150701107	43.27
ENSG00000123268	1489.08	-0.58062	0.231395	-2.50922	0.0121	1	ENST00000552510	ATF1	12	466	uc001rww.4	ATF1	protein_coding	50763710	50821122	41.93
ENSG00000138073	2157.1	-0.453839	0.181041	-2.50683	0.0121818	1	ENST00000468045	PREB	2	10113		PREB	protein_coding	27130756	27134675	57.47
ENSG00000034713	2321.88	0.372562	0.148621	2.50678	0.0121835	1	ENST00000037243	GABARAPL2	16	11345	uc002fen.3	GABARAPL2	protein_coding	75566351	75577881	47.18
ENSG00000066923	828.217	-0.578815	0.231165	-2.50391	0.012283	1	ENST00000426455	STAG3	7	10734	uc032zyz.1	STAG3	protein_coding	100177563	100221488	47.11
ENSG00000235238	223.687	0.558833	0.223537	2.49995	0.0124209	1	ENST00000445436	SUMO2P1	6			SUMO2P1	processed_pseudogene	29636060	29636343	45.42
ENSG00000172183	8426.18	-0.372969	0.149919	-2.4878	0.0128537	1	ENST00000560741	ISG20	15	3669	uc002bmv.1	ISG20	protein_coding	88636153	88656483	52.19
ENSG00000268027	2087.76	-0.441702	0.177758	-2.48485	0.0129607	1	ENST00000595649	#N/A	19			AC006129.2	lincRNA	41545192	41555462	41.63
ENSG00000142330	2439.28	0.371331	0.150236	2.47165	0.013449	1	ENST00000391984	CAPN10	2	11132	uc002vzk.2	CAPN10	protein_coding	240586716	240617705	54.59
ENSG00000101421	4827.44	0.291998	0.118376	2.46671	0.0136361	1	ENST00000217402	CHMP4B	20	128866	uc002xaa.3	CHMP4B	protein_coding	33811304	33854366	46.43
ENSG00000110777	16102	0.231487	0.0938576	2.46636	0.0136494	1	ENST00000393067	POU2AF1	11	5450	uc001plg.4	POU2AF1	protein_coding	111352252	111455630	45.99
ENSG00000115020	9371.78	0.295362	0.119813	2.46519	0.0136939	1	ENST00000392202	PIKFYVE	2	200576	uc002vcv.3	PIKFYVE	protein_coding	208266267	208358751	37.08
ENSG00000138101	495.961	0.566066	0.23091	2.45145	0.0142281	1	ENST00000398951	DTNB	2	1838	uc002rgi.4	DTNB	protein_coding	25377198	25673647	41.46
ENSG00000126216	2226.42	0.378036	0.154223	2.45123	0.0142369	1	ENST00000261965	TUBGCP3	13	10426	uc001vse.2	TUBGCP3	protein_coding	112485005	112588167	42.87
ENSG00000230592	9.78006	0.377879	0.154281	2.4493	0.0143136	1	ENST00000429844	RPSAP8	X			RPSAP8	processed_pseudogene	100155885	100156773	52.31
ENSG00000116221	1239.38	-0.411631	0.168137	-2.44818	0.0143579	1	ENST00000487096	MRPL37	1	51253		MRPL37	protein_coding	54184041	54225464	48.9
ENSG00000001629	2434.11	0.458752	0.187564	2.44585	0.0144512	1	ENST00000265742	ANKIB1	7	54467	uc003ulw.2	ANKIB1	protein_coding	92246234	92401384	36.77
ENSG00000185946	2348.28	0.439268	0.179886	2.44193	0.0146089	1	ENST00000524631	RNPC3	1	55599	uc010oum.1	RNPC3	protein_coding	103525691	103555239	35.03
ENSG00000170638	3863.91	0.294181	0.12063	2.43869	0.0147404	1	ENST00000380909	TRABD	22	80305	uc003bjs.1	TRABD	protein_coding	50185915	50199598	62.8
ENSG00000168710	3056.39	-0.323829	0.133097	-2.43303	0.0149729	1	ENST00000369799	AHCYL1	1	10768	uc001dyx.3	AHCYL1	protein_coding	109984686	110023741	40.97
ENSG00000167515	1056.89	-0.428353	0.176563	-2.42606	0.0152638	1	ENST00000564365	TRAPPC2L	16	51693		TRAPPC2L	protein_coding	88856220	88862686	58.39
ENSG00000108219	2582	0.342272	0.141139	2.42506	0.0153057	1	ENST00000429989	TSPAN14	10	81619	uc001kcj.4	TSPAN14	protein_coding	80454166	80533123	49.31
ENSG00000121073	887.855	-0.453078	0.186992	-2.42298	0.0153938	1	ENST00000240333	SLC35B1	17	10237	uc002iph.2	SLC35B1	protein_coding	49700943	49709014	47.79
ENSG00000147140	11004.1	-0.198283	0.0819777	-2.41875	0.015574	1	ENST00000276079	NONO	X	4841	uc004dzn.4	NONO	protein_coding	71283192	71301168	44.11
ENSG00000159388	17532.6	0.283145	0.117154	2.41686	0.0156552	1	ENST00000475157	BTG2	1	7832	uc001gzq.3	BTG2	protein_coding	203305491	203309602	53.33
ENSG00000228285	305.075	-0.555558	0.229959	-2.4159	0.0156965	1	ENST00000447689	LYPLA2P1	6			LYPLA2P1	processed_pseudogene	33365548	33366243	58.33
ENSG00000160294	5954.73	0.32921	0.136292	2.41548	0.0157146	1	ENST00000467026	MCM3AP	21	8888		MCM3AP	protein_coding	46235126	46286297	47.4
ENSG00000219102	23.3248	-0.346522	0.143513	-2.41457	0.015754	1	ENST00000437410	HNRNPA3P12	1			HNRNPA3P12	processed_pseudogene	53974969	53976031	43.65
ENSG00000167261	4282.52	-0.359387	0.148857	-2.41431	0.015765	1	ENST00000393847	DPEP2	16	64174	uc002eve.4	DPEP2	protein_coding	67987394	68000586	54.36
ENSG00000104921	16832	-0.353099	0.147164	-2.39935	0.0164241	1	ENST00000597312	FCER2	19	2208		FCER2	protein_coding	7688758	7702146	53.51
ENSG00000198901	216.549	0.497621	0.207504	2.39812	0.0164794	1	ENST00000394249	PRC1	15	9055	uc002bqm.4	PRC1	protein_coding	90966038	90995629	45.15
ENSG00000066294	2749.24	0.326624	0.136368	2.39516	0.0166129	1	ENST00000368054	CD84	1	8832	uc001fwf.4	CD84	protein_coding	160541095	160579516	41.6
ENSG00000140740	4416.74	-0.323753	0.13546	-2.39003	0.016847	1	ENST00000268379	UQCRC2	16	7385	uc002djx.3	UQCRC2	protein_coding	21952660	21983660	40.33
ENSG00000110713	3734.34	-0.405399	0.1697	-2.38892	0.0168978	1	ENST00000533346	NUP98	11	4928		NUP98	protein_coding	3671083	3797792	41.69
ENSG00000105656	1110.19	0.43249	0.181158	2.38737	0.0169695	1	ENST00000262809	ELL	19	8178	uc002njh.3	ELL	protein_coding	18442663	18522127	55.52
ENSG00000211668	2215.75	-0.540469	0.226655	-2.38454	0.0171003	1	ENST00000390314	IGLV2-11	22			IGLV2-11	IG_V_gene	22792491	22793007	58.03
ENSG00000044446	3044.61	0.364442	0.153065	2.38096	0.0172675	1	ENST00000379942	PHKA2	X	5256	uc004cyv.4	PHKA2	protein_coding	18892300	18984598	45.75
ENSG00000140391	8054.08	0.359122	0.150918	2.37958	0.0173322	1	ENST00000267970	TSPAN3	15	10099	uc002bcj.3	TSPAN3	protein_coding	77041404	77083984	41.92
ENSG00000139613	6053.19	-0.191192	0.080356	-2.37931	0.0173453	1	ENST00000394023	SMARCC2	12	6601	uc001skc.3	SMARCC2	protein_coding	56162983	56189567	48.99
ENSG00000203875	5370.15	-0.354766	0.149115	-2.37915	0.0173525	1	ENST00000623163	SNHG5	6			SNHG5	processed_transcript	85660950	85678736	40.9
ENSG00000164978	499.028	0.549606	0.231254	2.37663	0.0174714	1	ENST00000379158	NUDT2	9	318	uc003zub.3	NUDT2	protein_coding	34329506	34343713	46.38
ENSG00000188873	106.675	0.517825	0.218883	2.36576	0.0179929	1	ENST00000479243	RPL10AP2	8			RPL10AP2	processed_pseudogene	47157118	47157771	49.69
ENSG00000013573	2906.39	-0.432031	0.182631	-2.3656	0.0180011	1	ENST00000542838	DDX11	12	1663	uc001rjr.1	DDX11	protein_coding	31073845	31104791	52.28
ENSG00000133316	2361	-0.336299	0.142328	-2.36284	0.0181355	1	ENST00000536401	WDR74	11	54663		WDR74	protein_coding	62832342	62841809	51.65
ENSG00000198466	1459.33	0.395454	0.167372	2.36273	0.0181411	1	ENST00000339656	ZNF587	19	84914	uc002qql.3	ZNF587	protein_coding	57849857	57865112	46.53
ENSG00000128272	12016.7	-0.265143	0.11228	-2.36146	0.0182033	1	ENST00000404241	ATF4	22	468	uc003axz.3	ATF4	protein_coding	39519695	39522685	58.94
ENSG00000165025	21852.2	0.256816	0.108907	2.35812	0.0183679	1	ENST00000375754	SYK	9	6850	uc004aqz.3	SYK	protein_coding	90801787	90898549	44.17
ENSG00000130559	1446.79	-0.505703	0.214517	-2.3574	0.0184035	1	ENST00000389532	CAMSAP1	9	157922	uc004cgr.4	CAMSAP1	protein_coding	135808487	135907228	46.91
ENSG00000049089	1869.89	-0.471469	0.200273	-2.35413	0.0185659	1	ENST00000372748	COL9A2	1	1298	uc001cfh.1	COL9A2	protein_coding	40300487	40317816	57.43
ENSG00000197226	7157.02	0.301371	0.128043	2.35367	0.0185891	1	ENST00000518085	TBC1D9B	5	23061		TBC1D9B	protein_coding	179862066	179907859	54.22
ENSG00000164669	8.48625	-0.342913	0.145756	-2.35265	0.01864	1	ENST00000587624	INTS4P1	7			INTS4P1	transcribed_unprocessed_pseudogene	65141225	65234216	39.66
ENSG00000166086	1071.29	0.532939	0.226728	2.35057	0.0187448	1	ENST00000299106	JAM3	11	83700	uc001qhb.3	JAM3	protein_coding	134068925	134152001	41.98
ENSG00000156110	2500.37	-0.356427	0.15164	-2.35049	0.0187488	1	ENST00000286621	ADK	10	132	uc001jwi.3	ADK	protein_coding	74151185	74709303	37.42
ENSG00000165732	5654.74	-0.2973	0.12693	-2.34223	0.0191689	1	ENST00000354185	DDX21	10	9188	uc001jov.2	DDX21	protein_coding	68956128	68985073	41.17
ENSG00000133243	5168.79	-0.340644	0.145522	-2.34085	0.0192401	1	ENST00000592895	BTBD2	19	55643		BTBD2	protein_coding	1985438	2034881	55.3
ENSG00000197081	4138.94	-0.315907	0.135213	-2.33636	0.0194724	1	ENST00000356956	IGF2R	6	3482	uc003qta.3	IGF2R	protein_coding	159969099	160113507	45.55
ENSG00000259479	6.50706	-0.333796	0.142895	-2.33595	0.019494	1	ENST00000562107	SORD2P	15			SORD2P	transcribed_unprocessed_pseudogene	44826371	44884694	44.78
ENSG00000136040	2087.23	0.432635	0.185287	2.33495	0.0195463	1	ENST00000258526	PLXNC1	12	10154	uc001tdc.3	PLXNC1	protein_coding	94148723	94307675	43.75
ENSG00000172340	1664.28	0.448144	0.192081	2.3331	0.0196428	1	ENST00000493112	SUCLG2	3	8801	uc021xae.1	SUCLG2	protein_coding	67360460	67654614	39.38
ENSG00000180398	2387.98	0.352763	0.151395	2.33008	0.0198017	1	ENST00000409105	MCFD2	2	90411	uc002rvk.3	MCFD2	protein_coding	46901870	46941855	45.38
ENSG00000213930	1578.35	-0.458833	0.197369	-2.32475	0.0200852	1	ENST00000605275	GALT	9	2592		GALT	protein_coding	34638133	34651035	50.16
ENSG00000204264	6100.66	0.360288	0.155273	2.32035	0.0203219	1	ENST00000490613	PSMB8	6	5696		PSMB8	protein_coding	32840717	32844703	50.56
ENSG00000105443	1693.54	0.464307	0.20073	2.3131	0.0207173	1	ENST00000452733	CYTH2	19	9266	uc002pjj.4	CYTH2	protein_coding	48469032	48482314	58.29
ENSG00000229204	33.0625	0.358501	0.155065	2.31194	0.0207812	1	ENST00000511479	PTGES3P3	4			PTGES3P3	processed_pseudogene	169791221	169791702	37.76
ENSG00000064419	2536.15	0.350098	0.151493	2.31098	0.0208337	1	ENST00000265388	TNPO3	7	23534	uc003vol.2	TNPO3	protein_coding	128954180	129055173	39.8
ENSG00000174527	20.1992	-0.347272	0.150316	-2.31028	0.0208727	1	ENST00000310903	MYO1H	12	283446	uc010sxn.1	MYO1H	protein_coding	109347903	109455523	43.12
ENSG00000148218	2085.29	-0.419328	0.181606	-2.309	0.0209436	1	ENST00000409155	ALAD	9	210	uc011lxf.2	ALAD	protein_coding	113386317	113401333	51.45
ENSG00000110330	2360.88	0.357783	0.155033	2.30778	0.0210113	1	ENST00000527808	BIRC2	11	329		BIRC2	protein_coding	102347211	102378670	38.86
ENSG00000168411	2051.57	0.375674	0.16286	2.30672	0.0210702	1	ENST00000361070	RFWD3	16	55159	uc002fda.3	RFWD3	protein_coding	74621394	74666881	43.53
ENSG00000102575	3889.5	0.373338	0.162063	2.30365	0.0212421	1	ENST00000218758	ACP5	19	54	uc002msi.4	ACP5	protein_coding	11574660	11579008	58.59
ENSG00000115956	6992.52	0.320024	0.13894	2.30332	0.0212608	1	ENST00000234313	PLEK	2	5341	uc002sen.4	PLEK	protein_coding	68365173	68397453	41.22
ENSG00000211677	15902.5	-0.413502	0.179526	-2.30329	0.0212624	1	ENST00000390323	IGLC2	22			IGLC2	IG_C_gene	22900976	22901437	57.36
ENSG00000271856	4734.26	-0.318986	0.138557	-2.30219	0.0213243	1	ENST00000607746	LINC01215	3	101929623	uc032rwv.1	LINC01215	lincRNA	108125821	108138610	40.38
ENSG00000211941	1523.23	-0.491881	0.21371	-2.30163	0.0213562	1	ENST00000390601	IGHV3-11	14			IGHV3-11	IG_V_gene	106116635	106117204	51.93
ENSG00000142961	1133.86	0.412783	0.179354	2.3015	0.0213634	1	ENST00000271139	MOB3C	1	148932	uc001cqe.4	MOB3C	protein_coding	46607715	46616891	54.42
ENSG00000115486	1199.79	0.46442	0.201882	2.30046	0.0214224	1	ENST00000233838	GGCX	2	2677	uc002sps.3	GGCX	protein_coding	85544723	85561547	46.19
ENSG00000136813	2642.72	0.418135	0.181871	2.29908	0.0215006	1	ENST00000338205	KIAA0368	9	23392	uc004bfe.1	KIAA0368	protein_coding	111360692	111484745	39.33
ENSG00000131236	14572.1	-0.170457	0.0742376	-2.2961	0.0216699	1	ENST00000372797	CAP1	1	10487	uc009vvz.3	CAP1	protein_coding	40040233	40072649	43.27
ENSG00000168610	5839.28	-0.172389	0.075091	-2.29573	0.0216912	1	ENST00000264657	STAT3	17	6774	uc002hzl.1	STAT3	protein_coding	42313324	42388568	45.02
ENSG00000235688	43.6419	-0.282135	0.122923	-2.29521	0.0217209	1	ENST00000456949	#N/A	2			AC116614.1	antisense	949634	950274	57.57
ENSG00000092529	618.623	-0.442197	0.192665	-2.29516	0.0217238	1	ENST00000357568	CAPN3	15	825	uc001zpo.1	CAPN3	protein_coding	42359500	42412318	46.85
ENSG00000166226	4215.98	0.338706	0.147587	2.29496	0.0217354	1	ENST00000299300	CCT2	12	10576	uc001svb.1	CCT2	protein_coding	69585334	69601570	39.53
ENSG00000058272	5730.84	0.221414	0.097056	2.2813	0.0225306	1	ENST00000450142	PPP1R12A	12	4659	uc001syz.3	PPP1R12A	protein_coding	79773563	79935460	36.07
ENSG00000158158	1783.58	0.481346	0.211292	2.27811	0.02272	1	ENST00000377075	CNNM4	2	26504	uc002swx.3	CNNM4	protein_coding	96760902	96811891	50.16
ENSG00000136068	4319.48	0.39936	0.175639	2.27376	0.0229805	1	ENST00000490882	FLNB	3	2317	uc010hne.2	FLNB	protein_coding	58008400	58172251	46.61
ENSG00000175348	1838.7	-0.401122	0.176462	-2.27313	0.0230181	1	ENST00000309134	TMEM9B	11	56674	uc001mhf.3	TMEM9B	protein_coding	8947294	8965011	42.7
ENSG00000230756	12.8355	0.337785	0.148606	2.27302	0.0230249	1	ENST00000437982	RHOQP3	2			RHOQP3	processed_pseudogene	130212870	130213490	46.54
ENSG00000143878	3289.07	0.394696	0.173789	2.27111	0.0231401	1	ENST00000272233	RHOB	2	388	uc002rdv.3	RHOB	protein_coding	20447074	20449445	57.34
ENSG00000084070	21918.9	-0.292005	0.128794	-2.26722	0.0233766	1	ENST00000435168	SMAP2	1	64744		SMAP2	protein_coding	40344850	40423326	41.95
ENSG00000204516	1210.48	-0.437386	0.192918	-2.26722	0.0233771	1	ENST00000399150	MICB	6	4277	uc003nto.5	MICB	protein_coding	31494881	31511124	49.6
ENSG00000160752	1778.37	-0.396041	0.174828	-2.26532	0.0234932	1	ENST00000468479	FDPS	1	2224		FDPS	protein_coding	155308748	155320666	50.48
ENSG00000135250	4012.22	0.342618	0.151296	2.26455	0.02354	1	ENST00000493638	SRPK2	7	6733		SRPK2	protein_coding	105110704	105399308	41.06
ENSG00000131724	1608.55	-0.479355	0.211725	-2.26405	0.0235712	1	ENST00000371666	IL13RA1	X	3597	uc004eqs.3	IL13RA1	protein_coding	118727572	118794539	40.36
ENSG00000085872	2396.53	0.331592	0.146468	2.26393	0.0235786	1	ENST00000546361	CHERP	19	10523	uc002nei.1	CHERP	protein_coding	16517889	16542530	57.3
ENSG00000109685	2454.07	0.422554	0.186791	2.26217	0.0236867	1	ENST00000508803	WHSC1	4	7468	uc003gdz.4	WHSC1	protein_coding	1871424	1982207	47.14
ENSG00000136828	1390.08	0.521477	0.231123	2.25628	0.0240531	1	ENST00000259351	RALGPS1	9	9649	uc004bqo.2	RALGPS1	protein_coding	126914774	127223166	46.49
ENSG00000131115	832.485	0.474575	0.210715	2.25221	0.0243088	1	ENST00000590871	ZNF227	19	7770		ZNF227	protein_coding	44207547	44237268	41.09
ENSG00000237296	296.834	0.501639	0.222885	2.25066	0.0244069	1	ENST00000446662	SMG1P1	16			SMG1P1	transcribed_unprocessed_pseudogene	22437008	22492220	40.34
ENSG00000153922	4670.38	0.325986	0.144961	2.24878	0.0245262	1	ENST00000614616	CHD1	5	1105	uc003knf.3	CHD1	protein_coding	98853985	98928957	35.16
ENSG00000105926	1822.82	0.387921	0.172649	2.24687	0.0246483	1	ENST00000432190	MPP6	7	51678		MPP6	protein_coding	24573268	24694193	35.88
ENSG00000065809	12389.2	0.22195	0.0988788	2.24466	0.0247897	1	ENST00000378470	FAM107B	10	83641	uc001imx.2	FAM107B	protein_coding	14518557	14774897	43.19
ENSG00000138593	4312.05	0.325967	0.145259	2.24404	0.0248296	1	ENST00000561428	SECISBP2L	15	9728		SECISBP2L	protein_coding	48988476	49046563	36.79
ENSG00000160216	1979.18	-0.350189	0.156075	-2.24372	0.0248506	1	ENST00000291572	AGPAT3	21	56894	uc002zdv.3	AGPAT3	protein_coding	43865186	43986536	51.71
ENSG00000114030	2302.25	0.335747	0.149804	2.24124	0.0250105	1	ENST00000344337	KPNA1	3	3836	uc003efe.2	KPNA1	protein_coding	122421949	122514945	38.27
ENSG00000083857	22.1089	0.305268	0.136263	2.24029	0.0250722	1	ENST00000441802	FAT1	4	2195	uc003izf.3	FAT1	protein_coding	186587783	186726722	41.53
ENSG00000123064	3518.11	0.31866	0.142242	2.24026	0.025074	1	ENST00000314045	DDX54	12	79039	uc001tuq.4	DDX54	protein_coding	113157174	113185479	54.08
ENSG00000198218	5455.93	-0.254064	0.113779	-2.23297	0.025551	1	ENST00000395443	QRICH1	3	54870	uc003cvv.3	QRICH1	protein_coding	49029707	49094363	46.08
ENSG00000211653	3252.23	-0.455332	0.204056	-2.23141	0.0256538	1	ENST00000390299	IGLV1-40	22			IGLV1-40	IG_V_gene	22409766	22410282	58.8
ENSG00000167925	2282.19	-0.338882	0.152058	-2.22864	0.025838	1	ENST00000593209	GHDC	17	84514	uc002hzg.2	GHDC	protein_coding	42188799	42194532	58.28
ENSG00000254470	1841.59	-0.436076	0.196221	-2.22237	0.0262584	1	ENST00000532090	AP5B1	11	91056	uc031qbm.1	AP5B1	protein_coding	65775893	65780802	62.81
ENSG00000130309	6893.63	0.2579	0.116375	2.21611	0.0266842	1	ENST00000252599	COLGALT1	19	79709	uc002nhc.1	COLGALT1	protein_coding	17555594	17583162	52.86
ENSG00000163866	1250.91	0.509602	0.229962	2.21603	0.0266897	1	ENST00000426886	SMIM12	1			SMIM12	protein_coding	34712737	34859816	47.95
ENSG00000162892	6470.01	-0.277252	0.125201	-2.21446	0.0267975	1	ENST00000391929	IL24	1	11009	uc001heu.2	IL24	protein_coding	206897443	206904139	48.47
ENSG00000225695	209.228	-0.505053	0.229194	-2.2036	0.0275523	1	ENST00000429216	HNRNPA1P35	2			HNRNPA1P35	processed_pseudogene	201063089	201064051	46.63
ENSG00000213057	964.874	0.503111	0.228834	2.19858	0.0279078	1	ENST00000367638	C1orf220	1	400798		C1orf220	lincRNA	178542752	178548889	49.25
ENSG00000168010	10054.8	0.206348	0.0938563	2.19856	0.0279094	1	ENST00000321297	ATG16L2	11	89849	uc001otd.3	ATG16L2	protein_coding	72814308	72843674	52.8
ENSG00000270503	23.1691	-0.300656	0.13688	-2.19649	0.0280566	1	ENST00000604759	#N/A	14			RP11-407N17.6	processed_pseudogene	39215065	39216335	48.54
ENSG00000166783	12448.5	0.182733	0.0832493	2.195	0.0281633	1	ENST00000396368	KIAA0430	16	9665	uc010uzw.2	KIAA0430	protein_coding	15594386	15643166	44.18
ENSG00000152942	2004.52	-0.386108	0.175938	-2.19456	0.028195	1	ENST00000514066	RAD17	5	5884		RAD17	protein_coding	69369293	69414801	39.7
ENSG00000133874	866.855	-0.465736	0.212406	-2.19267	0.0283315	1	ENST00000256257	RNF122	8	79845	uc003xjo.2	RNF122	protein_coding	33547755	33567125	49.07
ENSG00000132424	23567.9	0.141135	0.0643784	2.19228	0.0283595	1	ENST00000369239	PNISR	6	25957	uc003ppo.4	PNISR	protein_coding	99398051	99425331	36
ENSG00000065923	6476.67	-0.270822	0.123616	-2.19083	0.0284642	1	ENST00000616978	SLC9A7	X	84679	uc004dgv.2	SLC9A7	protein_coding	46599252	46759172	41.07
ENSG00000167522	10749	0.187186	0.0855884	2.18705	0.0287387	1	ENST00000378330	ANKRD11	16	29123	uc002fmy.2	ANKRD11	protein_coding	89267627	89490561	51.19
ENSG00000111837	16.4033	-0.267015	0.122114	-2.18661	0.0287709	1	ENST00000313243	MAK	6	4117	uc003mzm.3	MAK	protein_coding	10762723	10838555	42.11
ENSG00000130702	5570.05	0.326976	0.149565	2.18618	0.0288028	1	ENST00000492698	LAMA5	20	3911		LAMA5	protein_coding	62307955	62367312	61.89
ENSG00000119812	1049.97	-0.450307	0.206053	-2.18539	0.0288604	1	ENST00000238823	FAM98A	2	25940	uc002rpa.1	FAM98A	protein_coding	33583658	33599382	37.55
ENSG00000148337	4829.41	-0.25739	0.117865	-2.18377	0.0289789	1	ENST00000471773	CIZ1	9	25792		CIZ1	protein_coding	128166064	128204383	52.19
ENSG00000169925	1865.27	0.391239	0.17974	2.17669	0.0295036	1	ENST00000303407	BRD3	9	8019	uc004cew.3	BRD3	protein_coding	134030305	134068535	57.61
ENSG00000107140	1879.71	-0.432761	0.19889	-2.17588	0.0295641	1	ENST00000336395	TESK1	9	7016	uc003zxa.3	TESK1	protein_coding	35605305	35610041	59.15
ENSG00000228205	557.584	-0.43836	0.201735	-2.17295	0.029784	1	ENST00000433853	#N/A	3			RP11-778D9.4	processed_pseudogene	184149704	184150435	52.19
ENSG00000122694	948.614	0.502411	0.231444	2.17077	0.0299486	1	ENST00000377959	GLIPR2	9	152007	uc033cqd.1	GLIPR2	protein_coding	36136536	36163913	51.06
ENSG00000133597	1202.94	0.501677	0.231322	2.16873	0.0301029	1	ENST00000072869	ADCK2	7	90956	uc003vvy.1	ADCK2	protein_coding	140673153	140696261	50.51
ENSG00000134255	3795.44	-0.284383	0.13116	-2.16821	0.0301425	1	ENST00000498239	CEPT1	1	10390		CEPT1	protein_coding	111139627	111185102	36.54
ENSG00000124228	4338.03	-0.262961	0.121423	-2.16565	0.0303376	1	ENST00000371764	DDX27	20	55661	uc002xuh.3	DDX27	protein_coding	49219295	49244077	49.05
ENSG00000178764	4488.03	-0.268216	0.123921	-2.16441	0.0304329	1	ENST00000314393	ZHX2	8	22882	uc003ypk.1	ZHX2	protein_coding	122781394	122974512	46.32
ENSG00000229914	32.0585	-0.25193	0.116465	-2.16313	0.0305311	1	ENST00000439139	#N/A	1			RP11-404O13.4	processed_pseudogene	158195633	158196131	53.31
ENSG00000136193	3933.9	0.380249	0.176023	2.16022	0.0307554	1	ENST00000242059	SCRN1	7	9805	uc003tak.3	SCRN1	protein_coding	29920103	29990289	43.91
ENSG00000116957	692.036	-0.497825	0.230602	-2.15881	0.0308649	1	ENST00000366601	TBCE	1	6905	uc001hwz.2	TBCE	protein_coding	235367360	235448968	44.4
ENSG00000171604	10353.6	-0.252	0.116742	-2.15861	0.0308804	1	ENST00000502295	CXXC5	5	51523		CXXC5	protein_coding	139647299	139683882	58.2
ENSG00000161265	1497.54	0.389266	0.180476	2.15689	0.0310143	1	ENST00000591057	U2AF1L4	19	199746	uc002obf.4	U2AF1L4	protein_coding	35742464	35745445	55.84
ENSG00000110660	1009.12	-0.4913	0.228299	-2.152	0.0313972	1	ENST00000525815	SLC35F2	11	54733	uc001pjq.3	SLC35F2	protein_coding	107790991	107928293	43.51
ENSG00000139637	1023.17	-0.377258	0.175488	-2.14976	0.031574	1	ENST00000267103	C12orf10	12	60314	uc001scp.4	C12orf10	protein_coding	53299686	53307177	51.21
ENSG00000169764	3391.89	-0.36053	0.167763	-2.14904	0.0316313	1	ENST00000394417	UGP2	2	7360	uc002scl.3	UGP2	protein_coding	63840940	63891562	38.65
ENSG00000185710	129.534	-0.374889	0.174468	-2.14875	0.0316539	1	ENST00000523028	SMG1P4	16			SMG1P4	transcribed_unprocessed_pseudogene	21879338	21919156	38.52
ENSG00000177311	2237.99	0.455902	0.2127	2.1434	0.0320808	1	ENST00000509842	ZBTB38	3	253461	uc003etw.3	ZBTB38	protein_coding	141324213	141449792	42.29
ENSG00000240505	3139.57	0.475474	0.222012	2.14166	0.0322209	1	ENST00000584950	TNFRSF13B	17	23495		TNFRSF13B	protein_coding	16929816	16972118	48.46
ENSG00000234335	64.4546	0.469443	0.219404	2.13963	0.0323847	1	ENST00000446897	RPS4XP11	10			RPS4XP11	processed_pseudogene	32102522	32103293	45.98
ENSG00000138785	819.858	0.494865	0.231296	2.13953	0.0323927	1	ENST00000394735	INTS12	4	57117	uc010ilr.3	INTS12	protein_coding	105682627	105895986	36.56
ENSG00000007168	5662.86	0.251578	0.117898	2.13386	0.0328542	1	ENST00000576586	PAFAH1B1	17	5048		PAFAH1B1	protein_coding	2593210	2685615	42.4
ENSG00000134086	6348.72	0.231347	0.10843	2.1336	0.0328754	1	ENST00000256474	VHL	3	7428	uc003bvc.3	VHL	protein_coding	10141008	10152220	47.55
ENSG00000163608	2028.58	-0.383169	0.179654	-2.13281	0.0329403	1	ENST00000314400	C3orf17	3	25871	uc003dzr.3	C3orf17	protein_coding	113002440	113019861	39.07
ENSG00000141378	501.036	-0.439735	0.206387	-2.13063	0.0331194	1	ENST00000587935	PTRH2	17	51651		PTRH2	protein_coding	59674636	59707626	39.24
ENSG00000118307	32.0474	0.273427	0.128349	2.13034	0.0331434	1	ENST00000556006	CASC1	12	55259	uc001rgl.3	CASC1	protein_coding	25108420	25195162	38.2
ENSG00000143376	1509.81	-0.408993	0.192054	-2.12958	0.0332066	1	ENST00000368841	SNX27	1	81609		SNX27	protein_coding	151612065	151699091	40.41
ENSG00000164941	2928.4	0.276835	0.130064	2.12845	0.0332997	1	ENST00000522171	INTS8	8	55656		INTS8	protein_coding	94813311	94881746	40.21
ENSG00000089335	2123.14	-0.331221	0.155755	-2.12655	0.0334576	1	ENST00000512455	ZNF302	19	55900		ZNF302	protein_coding	34677639	34686397	39.83
ENSG00000001461	1845.2	0.349381	0.16439	2.12532	0.0335601	1	ENST00000374399	NIPAL3	1	57185	uc001bjh.3	NIPAL3	protein_coding	24415794	24472976	45
ENSG00000107651	1799.79	0.360684	0.169782	2.1244	0.0336369	1	ENST00000369075	SEC23IP	10	11196	uc001leu.2	SEC23IP	protein_coding	119892711	119944658	40.11
ENSG00000064961	1968.16	0.397511	0.187267	2.12269	0.0337794	1	ENST00000416526	HMG20B	19	10362	uc002lya.3	HMG20B	protein_coding	3572777	3579088	65.34
ENSG00000185958	1.74609	-0.297241	0.140202	-2.12008	0.0339991	1	ENST00000543111	FAM186A	12	121006	uc001rwl.2	FAM186A	protein_coding	50326230	50396622	43.76
ENSG00000230330	1865.2	-0.380851	0.179672	-2.1197	0.0340315	1	ENST00000433603	HMGN2P3	16			HMGN2P3	processed_pseudogene	26032539	26032811	51.28
ENSG00000153574	1937.12	0.414758	0.195679	2.11959	0.034041	1	ENST00000283646	RPIA	2	22934	uc002ste.3	RPIA	protein_coding	88691644	88750935	41.25
ENSG00000116337	2430.26	-0.344554	0.162618	-2.11879	0.034108	1	ENST00000531734	AMPD2	1	271		AMPD2	protein_coding	109616104	109632051	56.74
ENSG00000115649	5611.65	-0.28211	0.133228	-2.1175	0.0342173	1	ENST00000360507	CNPPD1	2	27013	uc002vju.4	CNPPD1	protein_coding	219171897	219178106	54.28
ENSG00000162511	65729.5	-0.133503	0.0631687	-2.11344	0.0345633	1	ENST00000294507	LAPTM5	1	7805	uc001bsc.2	LAPTM5	protein_coding	30732469	30757820	52.62
ENSG00000023734	2477.17	-0.310037	0.146763	-2.1125	0.0346432	1	ENST00000541731	STRAP	12	11171		STRAP	protein_coding	15882391	15903478	36.48
ENSG00000233328	236.157	0.486343	0.230234	2.11238	0.0346538	1	ENST00000442087	PFN1P1	1			PFN1P1	processed_pseudogene	171670517	171670939	56.03
ENSG00000263563	36.0369	0.414	0.196081	2.11138	0.0347399	1	ENST00000581769	UBBP4	17		uc002gyy.3	UBBP4	protein_coding	22202995	22205156	50
ENSG00000175390	7852.93	-0.288662	0.136761	-2.11071	0.0347975	1	ENST00000533626	EIF3F	11	8665	uc001mfw.4	EIF3F	protein_coding	7970251	8001862	41.38
ENSG00000230869	39.086	-0.27318	0.129466	-2.11005	0.0348541	1	ENST00000454844	CTGLF10P	10			CTGLF10P	unprocessed_pseudogene	45678692	45700532	40.58
ENSG00000091483	1164.35	-0.322003	0.152656	-2.10934	0.0349154	1	ENST00000366560	FH	1	2271	uc001hyx.3	FH	protein_coding	241497603	241519761	36.87
ENSG00000131747	40.7308	0.34186	0.162126	2.1086	0.0349791	1	ENST00000423485	TOP2A	17	7153	uc002huq.3	TOP2A	protein_coding	40388516	40417950	39.83
ENSG00000122299	3221.03	-0.400118	0.18977	-2.10844	0.0349934	1	ENST00000396516	ZC3H7A	16	29066	uc002dbl.3	ZC3H7A	protein_coding	11750586	11797267	42.77
ENSG00000263846	13.64	-0.316526	0.150281	-2.10622	0.0351848	1	ENST00000584883	CIAPIN1P	18			CIAPIN1P	processed_pseudogene	26599408	26600338	50.81
ENSG00000152127	9819.98	-0.253055	0.120163	-2.10592	0.0352111	1	ENST00000481801	MGAT5	2	4249		MGAT5	protein_coding	134119983	134454621	42.88
ENSG00000125812	580.682	0.481549	0.22877	2.10495	0.0352957	1	ENST00000338121	GZF1	20	64412	uc002wsy.3	GZF1	protein_coding	23362182	23373063	44.84
ENSG00000224040	5.2264	-0.356758	0.169816	-2.10085	0.0356545	1	ENST00000419500	HMGN1P4	1			HMGN1P4	processed_pseudogene	182942115	182942404	51.38
ENSG00000110057	9429.38	-0.247833	0.118005	-2.10018	0.0357128	1	ENST00000610659	UNC93B1	11	81622		UNC93B1	protein_coding	67991104	68004982	58.6
ENSG00000124789	3405.73	0.284305	0.135404	2.09967	0.0357577	1	ENST00000262077	NUP153	6	9972	uc003ncd.2	NUP153	protein_coding	17615035	17706834	40.18
ENSG00000181085	11.89	-0.241332	0.115043	-2.09775	0.0359273	1	ENST00000338033	MAPK15	8	225689	uc003yzj.3	MAPK15	protein_coding	143716259	143722458	65.08
ENSG00000087088	3167.6	-0.354653	0.169142	-2.09678	0.0360129	1	ENST00000502487	BAX	19	581	uc010xzx.2	BAX	protein_coding	48954815	48961798	53.57
ENSG00000164938	12890.3	-0.292158	0.139608	-2.0927	0.036376	1	ENST00000448464	TP53INP1	8	94241	uc003yhh.3	TP53INP1	protein_coding	94925972	94949411	42.53
ENSG00000125245	1616.62	-0.422271	0.202139	-2.08901	0.0367066	1	ENST00000340807	GPR18	13	2841	uc010afv.3	GPR18	protein_coding	99254714	99261744	37.42
ENSG00000143924	7453.14	0.228663	0.109508	2.0881	0.0367887	1	ENST00000318522	EML4	2	27436	uc002rsi.3	EML4	protein_coding	42169350	42332548	38.02
ENSG00000186076	254.06	-0.426423	0.204344	-2.08679	0.0369075	1	ENST00000548270	#N/A	12			RP11-887P2.3	processed_pseudogene	93640822	93641586	56.08
ENSG00000214110	45.7229	0.398782	0.191174	2.08596	0.036982	1	ENST00000397561	LDHAP4	9			LDHAP4	processed_pseudogene	14921337	14922334	44.69
ENSG00000105053	2186.22	0.417155	0.199998	2.08579	0.0369974	1	ENST00000316763	VRK3	19	51231	uc002prh.1	VRK3	protein_coding	49976467	50025946	50.86
ENSG00000126790	1554.27	-0.475229	0.22786	-2.08562	0.0370131	1	ENST00000466522	L3HYPDH	14	112849		L3HYPDH	protein_coding	59460363	59484430	42.53
ENSG00000124508	4400.99	-0.393958	0.188925	-2.08526	0.0370456	1	ENST00000469230	BTN2A2	6	10385	uc003nhs.3	BTN2A2	protein_coding	26383096	26394874	45.78
ENSG00000182372	1796.94	0.357565	0.171545	2.08438	0.0371258	1	ENST00000524258	CLN8	8	2055		CLN8	protein_coding	1755778	1786572	49.11
ENSG00000170291	1351.35	-0.357807	0.171809	-2.08259	0.0372884	1	ENST00000356683	ELP5	17	23587	uc002gfj.4	ELP5	protein_coding	7251416	7259940	51.3
ENSG00000081052	1755.7	0.47021	0.225826	2.08218	0.037326	1	ENST00000396625	COL4A4	2	1286	uc032oul.1	COL4A4	protein_coding	227002711	227164113	40.93
ENSG00000185485	1519.04	0.408989	0.196588	2.08043	0.037486	1	ENST00000427149	SDHAP1	3	255812		SDHAP1	transcribed_unprocessed_pseudogene	195959748	195990318	48.24
ENSG00000091972	3615.92	-0.408787	0.196612	-2.07916	0.0376031	1	ENST00000607597	CD200	3	4345		CD200	protein_coding	112332347	112362812	38.61
ENSG00000118707	1812.04	0.383693	0.184629	2.07818	0.0376926	1	ENST00000373874	TGIF2	20	60436	uc021wcv.1	TGIF2	protein_coding	36573488	36593950	51.95
ENSG00000084733	3119.85	-0.319202	0.153813	-2.07526	0.0379629	1	ENST00000495146	RAB10	2	10890		RAB10	protein_coding	26034107	26137454	40.62
ENSG00000178082	84.1935	-0.375648	0.181196	-2.07316	0.0381575	1	ENST00000580812	TWF1P1	17			TWF1P1	processed_pseudogene	29203426	29204474	39.47
ENSG00000095015	13332.9	0.18503	0.0892579	2.07298	0.0381739	1	ENST00000399503	MAP3K1	5	4214	uc003jqw.4	MAP3K1	protein_coding	56815574	56896152	38.07
ENSG00000110934	5495.76	-0.288542	0.139273	-2.07177	0.0382866	1	ENST00000604560	BIN2	12	51411	uc001ryg.3	BIN2	protein_coding	51281038	51324668	44.59
ENSG00000100591	2334.7	-0.314538	0.151956	-2.06993	0.0384587	1	ENST00000555133	AHSA1	14	10598	uc001xtw.3	AHSA1	protein_coding	77457870	77469474	46.04
ENSG00000173581	1517.46	-0.433932	0.209638	-2.06992	0.0384602	1	ENST00000592996	CCDC106	19	29903	uc002qls.3	CCDC106	protein_coding	55641062	55653161	61.17
ENSG00000119013	438.844	0.430991	0.208219	2.06989	0.0384624	1	ENST00000450023	NDUFB3	2	4709	uc002uwx.5	NDUFB3	protein_coding	201071433	201085750	41.49
ENSG00000140992	3243.49	0.283201	0.136965	2.06769	0.0386687	1	ENST00000342085	PDPK1	16	5170	uc002cqs.4	PDPK1	protein_coding	2537964	2603188	52.51
ENSG00000173821	16434.3	0.272204	0.131753	2.06602	0.0388266	1	ENST00000508628	RNF213	17	57674	uc021uen.2	RNF213	protein_coding	80260866	80398786	49.93
ENSG00000117601	18.2149	-0.232458	0.112643	-2.06368	0.039048	1	ENST00000367698	SERPINC1	1	462	uc001gjt.3	SERPINC1	protein_coding	173903804	173917378	46.31
ENSG00000261812	9.37941	-0.234892	0.113887	-2.0625	0.0391605	1	ENST00000564451	TUBB8P7	16			TUBB8P7	polymorphic_pseudogene	90093154	90096354	56.61
ENSG00000178429	214.275	-0.476507	0.231083	-2.06205	0.0392025	1	ENST00000389400	RPS3AP5	10			RPS3AP5	processed_pseudogene	84560443	84561263	42.39
ENSG00000082516	914.012	0.431429	0.209517	2.05916	0.0394788	1	ENST00000285873	GEMIN5	5	25929	uc003lvx.3	GEMIN5	protein_coding	154887416	154938209	41.33
ENSG00000170476	5307.05	-0.341074	0.165884	-2.0561	0.0397727	1	ENST00000503481	MZB1	5	51237	uc003lei.3	MZB1	protein_coding	139387480	139390081	58.38
ENSG00000128789	1252.02	-0.397565	0.193387	-2.0558	0.0398015	1	ENST00000585853	PSMG2	18	56984		PSMG2	protein_coding	12658043	12725740	42.01
ENSG00000120910	3878.16	-0.227117	0.110506	-2.05524	0.0398557	1	ENST00000518852	PPP3CC	8	5533	uc003xbr.2	PPP3CC	protein_coding	22440819	22541142	39.2
ENSG00000011260	1596.02	-0.378134	0.184012	-2.05494	0.0398846	1	ENST00000225298	UTP18	17	51096	uc002its.3	UTP18	protein_coding	51260528	51297936	40.38
ENSG00000253497	86.7828	0.380264	0.185083	2.05456	0.0399218	1	ENST00000521705	IGKV1-13	2			IGKV1-13	IG_V_pseudogene	89045995	89046466	50.21
ENSG00000088298	1609.52	-0.278097	0.135435	-2.05336	0.0400379	1	ENST00000374491	EDEM2	20	55741	uc002xbq.2	EDEM2	protein_coding	35115357	35147364	45.82
ENSG00000106636	3157.75	0.297447	0.144902	2.05275	0.0400969	1	ENST00000496112	YKT6	7	10652	uc011kbv.2	YKT6	protein_coding	44200968	44214294	48.11
ENSG00000090316	3686.06	-0.281482	0.137172	-2.05203	0.0401666	1	ENST00000303400	MAEA	4	10296	uc003gda.3	MAEA	protein_coding	1289851	1340147	55.03
ENSG00000089220	4724.55	-0.259508	0.126576	-2.05021	0.0403443	1	ENST00000261313	PEBP1	12	5037	uc001twu.1	PEBP1	protein_coding	118135858	118145584	49.19
ENSG00000230626	130.918	-0.430779	0.210206	-2.04932	0.0404307	1	ENST00000467614	#N/A	7			RP11-286H14.4	transcribed_processed_pseudogene	129126518	129130793	49.93
ENSG00000145020	1819.97	-0.419053	0.204507	-2.04909	0.0404536	1	ENST00000465925	AMT	3	275		AMT	protein_coding	49416778	49422753	54.5
ENSG00000265972	123299	-0.250905	0.122489	-2.04839	0.0405213	1	ENST00000582401	TXNIP	1	10628	uc031utr.1	TXNIP	protein_coding	145992435	145996600	42.49
ENSG00000243679	1114.13	0.445038	0.217282	2.04821	0.0405397	1	ENST00000450885	#N/A	7			RP11-274B21.3	processed_pseudogene	128653969	128654722	67.24
ENSG00000091592	17188.9	-0.172449	0.084244	-2.04702	0.0406564	1	ENST00000544378	NLRP1	17	22861	uc002gcg.1	NLRP1	protein_coding	5499427	5619424	46.74
ENSG00000158865	56.2408	0.277676	0.135849	2.04401	0.0409526	1	ENST00000347898	SLC5A11	16	115584	uc002dmu.4	SLC5A11	protein_coding	24845841	24911628	45.54
ENSG00000126773	2266.19	-0.364663	0.178447	-2.04354	0.0409992	1	ENST00000317623	PCNXL4	14	64430	uc001xer.4	PCNXL4	protein_coding	60091911	60169133	37.99
ENSG00000126945	3362.17	-0.321705	0.15748	-2.04283	0.0410689	1	ENST00000316594	HNRNPH2	X	3188	uc004ehm.3	HNRNPH2	protein_coding	101408295	101414133	39.49
ENSG00000058453	2647.19	-0.322929	0.15813	-2.04217	0.0411344	1	ENST00000466256	CROCC	1	9696		CROCC	protein_coding	16740273	16972979	49.14
ENSG00000248697	8.88571	0.28029	0.137387	2.04014	0.0413363	1	ENST00000514955	TOX4P1	4			TOX4P1	processed_pseudogene	112455924	112457785	49.79
ENSG00000124721	192.417	0.356353	0.17493	2.03712	0.0416384	1	ENST00000327475	DNAH8	6	1769	uc021yzh.1	DNAH8	protein_coding	38715341	39030529	39.11
ENSG00000010671	12601.7	-0.200195	0.0982819	-2.03695	0.0416552	1	ENST00000308731	BTK	X	695	uc004ehg.2	BTK	protein_coding	101349447	101390796	43.18
ENSG00000183741	2837.19	-0.305082	0.149835	-2.03613	0.0417377	1	ENST00000407418	CBX6	22	23466	uc003awl.3	CBX6	protein_coding	38861450	38872314	58.47
ENSG00000133460	1727.02	-0.33389	0.164115	-2.03448	0.0419031	1	ENST00000345044	SLC2A11	22	66035	uc002zyn.5	SLC2A11	protein_coding	23856703	23886309	50.84
ENSG00000132967	2624	-0.384245	0.188889	-2.03424	0.0419278	1	ENST00000255320	HMGB1P5	3			HMGB1P5	transcribed_processed_pseudogene	22381819	22382929	39.42
ENSG00000239975	75.1563	-0.360596	0.177345	-2.0333	0.0420219	1	ENST00000390265	IGKV1D-33	2			IGKV1D-33	IG_V_gene	89913982	89916052	43.02
ENSG00000006025	2524.64	-0.355895	0.175173	-2.03168	0.0421863	1	ENST00000007414	OSBPL7	17	114881	uc002ilx.1	OSBPL7	protein_coding	47807372	47821834	57.86
ENSG00000230979	176.102	-0.469131	0.231151	-2.02955	0.0424026	1	ENST00000456046	#N/A	2			AC079250.1	processed_pseudogene	47690716	47691246	59.7
ENSG00000078369	12592.8	-0.148365	0.0732847	-2.0245	0.0429183	1	ENST00000378609	GNB1	1	2782	uc001aif.4	GNB1	protein_coding	1785285	1891117	46.7
ENSG00000273079	1.83617	-0.255325	0.126236	-2.0226	0.0431144	1	ENST00000609686	GRIN2B	12	2904	uc001rbt.2	GRIN2B	protein_coding	13537337	13981957	40.58
ENSG00000171862	7240.92	0.223125	0.110404	2.02099	0.0432806	1	ENST00000371953	PTEN	10	5728	uc001kfb.3	PTEN	protein_coding	87863113	87971930	35.77
ENSG00000145113	4.30119	-0.411829	0.20394	-2.01936	0.0434494	1	ENST00000308466	MUC4	3	4585		MUC4	protein_coding	195746765	195812277	53.76
ENSG00000268222	8.62591	-0.264942	0.131249	-2.01862	0.043527	1	ENST00000596811	EEF1A1P7	19			EEF1A1P7	processed_pseudogene	35382172	35384052	45.03
ENSG00000089057	3263.66	0.244881	0.121391	2.0173	0.0436641	1	ENST00000338244	SLC23A2	20	9962	uc002wlg.1	SLC23A2	protein_coding	4852356	5010293	44.93
ENSG00000083223	2989.96	0.233112	0.115574	2.01699	0.0436961	1	ENST00000277141	ZCCHC6	9	79670	uc004aoq.3	ZCCHC6	protein_coding	86287733	86354454	37.99
ENSG00000131368	4285.95	0.267193	0.132573	2.01544	0.0438581	1	ENST00000496484	MRPS25	3	64432		MRPS25	protein_coding	15042460	15065335	47.97
ENSG00000278540	872.618	-0.356995	0.177146	-2.01526	0.0438774	1	ENST00000616317	ACACA	17	31	uc032fee.1	ACACA	protein_coding	37084988	37406818	41.27
ENSG00000234782	456.813	0.389114	0.193118	2.01491	0.0439141	1	ENST00000413759	TPT1P9	9			TPT1P9	processed_pseudogene	118082869	118083382	43.58
ENSG00000108389	4856.18	-0.217685	0.108098	-2.01376	0.0440344	1	ENST00000579925	MTMR4	17	9110	uc002iwj.2	MTMR4	protein_coding	58489529	58517905	47.85
ENSG00000153815	3633.9	0.292595	0.145372	2.01274	0.0441421	1	ENST00000537098	CMIP	16	80790	uc002fgp.4	CMIP	protein_coding	81445170	81711762	51.33
ENSG00000233927	1258.67	0.442206	0.219737	2.01244	0.0441739	1	ENST00000449223	RPS28	19	6234		RPS28	protein_coding	8321158	8323340	57.12
ENSG00000188459	135.126	0.41708	0.207583	2.00922	0.044514	1	ENST00000444248	WASF4P	X			WASF4P	processed_pseudogene	47803296	47804789	52.41
ENSG00000172687	570.824	-0.446191	0.22218	-2.00824	0.0446177	1	ENST00000311015	ZNF738	19		uc002nps.4	ZNF738	protein_coding	21358930	21379302	40.08
ENSG00000271360	8.67807	0.27362	0.136267	2.00797	0.0446465	1	ENST00000604634	#N/A	10	439951		RP11-138I18.1	antisense	11611305	11612227	69.23
ENSG00000150093	6492.7	0.407455	0.203039	2.00678	0.0447728	1	ENST00000302278	ITGB1	10	3688	uc001iwt.4	ITGB1	protein_coding	32900319	33005792	39.15
ENSG00000227492	41.7108	-0.263638	0.131432	-2.00589	0.0448684	1	ENST00000444359	#N/A	10			RP11-316M21.6	antisense	100229667	100234000	45.85
ENSG00000150753	3726.36	0.244374	0.12191	2.00454	0.0450126	1	ENST00000280326	CCT5	5	22948	uc003jeq.3	CCT5	protein_coding	10249921	10266412	43.56
ENSG00000118898	10.355	0.282997	0.141271	2.00321	0.0451544	1	ENST00000345988	PPL	16	5493	uc002cyd.1	PPL	protein_coding	4882507	4960741	53.44
ENSG00000237039	171.453	0.458258	0.228914	2.00188	0.0452978	1	ENST00000441378	#N/A	2			AC018738.2	processed_pseudogene	231256097	231256306	62.38
ENSG00000117385	1589.43	-0.33984	0.169785	-2.00159	0.0453291	1	ENST00000460031	P3H1	1	64175		P3H1	protein_coding	42746335	42767084	50.04
ENSG00000139174	763.821	-0.456591	0.228155	-2.00124	0.045367	1	ENST00000345127	PRICKLE1	12	144165	uc001rnm.3	PRICKLE1	protein_coding	42456754	42590355	41.36
ENSG00000157593	1274.99	-0.390391	0.195108	-2.00089	0.0454038	1	ENST00000495706	SLC35B2	6	347734	uc032wwj.1	SLC35B2	protein_coding	44254096	44257890	58.08
ENSG00000040531	722.833	-0.3905	0.195189	-2.00063	0.0454321	1	ENST00000046640	CTNS	17	1497	uc002fwb.3	CTNS	protein_coding	3636468	3661542	54.27
ENSG00000100403	4700.77	-0.205742	0.102915	-1.99914	0.045593	1	ENST00000352645	ZC3H7B	22	23264	uc003azw.4	ZC3H7B	protein_coding	41301522	41360147	54.29
ENSG00000205918	176.735	0.393004	0.196642	1.99857	0.0456548	1	ENST00000382326	PDPK2P	16			PDPK2P	transcribed_unprocessed_pseudogene	2616121	2643296	52.98
ENSG00000120451	3369.72	0.361783	0.181179	1.99683	0.0458437	1	ENST00000265909	SNX19	11	399979	uc001qgk.4	SNX19	protein_coding	130875436	130916509	42.46
ENSG00000131979	859.924	-0.411366	0.206051	-1.99642	0.0458877	1	ENST00000543643	GCH1	14	2643	uc001xbj.1	GCH1	protein_coding	54842008	54902852	42.22
ENSG00000214367	1732.64	0.319626	0.160219	1.99493	0.046051	1	ENST00000506763	HAUS3	4	79441	uc011bvj.1	HAUS3	protein_coding	2227464	2242164	37.25
ENSG00000175115	11229.6	-0.183249	0.0918932	-1.99416	0.046135	1	ENST00000527224	PACS1	11	55690		PACS1	protein_coding	66070363	66244747	43.97
ENSG00000100104	701.432	0.447714	0.224691	1.99258	0.0463079	1	ENST00000215917	SRRD	22	402055	uc010gve.3	SRRD	protein_coding	26483877	26494658	45.15
ENSG00000279800	493.248	-0.456869	0.22929	-1.99254	0.0463118	1	ENST00000624956	#N/A	16			ABBA01017803.1	pseudogene	34266044	34268649	42.52
ENSG00000155465	2601.97	0.417064	0.20946	1.99114	0.0464659	1	ENST00000285850	SLC7A7	14	9056	uc001wgu.4	SLC7A7	protein_coding	22773222	22829820	47.24
ENSG00000167671	3093.82	0.227011	0.114087	1.98981	0.0466114	1	ENST00000591919	UBXN6	19	80700	uc002man.2	UBXN6	protein_coding	4444999	4457822	59.86
ENSG00000100225	4398.36	0.302604	0.152084	1.98972	0.0466219	1	ENST00000266087	FBXO7	22	25793	uc003amq.3	FBXO7	protein_coding	32474676	32498829	38.81
ENSG00000071859	1673.64	0.350397	0.176178	1.98888	0.0467148	1	ENST00000393600	FAM50A	X	9130	uc004fll.4	FAM50A	protein_coding	154444126	154450654	60.48
ENSG00000196664	1834.54	0.351551	0.177115	1.98487	0.0471593	1	ENST00000380659	TLR7	X	51284	uc004cvc.3	TLR7	protein_coding	12867083	12890380	40.25
ENSG00000124164	1582.16	0.305692	0.154118	1.98349	0.0473128	1	ENST00000475243	VAPB	20	9217	uc002xza.3	VAPB	protein_coding	58389122	58451101	42.86
ENSG00000255310	835.394	0.418187	0.210891	1.98296	0.0473721	1	ENST00000530248	#N/A	8			AF131215.2	sense_intronic	11107788	11109726	42.08
ENSG00000155657	2971.57	0.335485	0.1694	1.98043	0.047655	1	ENST00000342992	TTN	2	7273	uc021vsy.3	TTN	protein_coding	178525989	178830802	37.71
ENSG00000226790	80.5858	0.351751	0.177692	1.97955	0.0477542	1	ENST00000401429	HNRNPA3P1	10			HNRNPA3P1	processed_pseudogene	43789249	43790387	46.36
ENSG00000176853	3296.64	0.33961	0.171585	1.97925	0.0477876	1	ENST00000521166	FAM91A1	8	157769	uc011lik.1	FAM91A1	protein_coding	123768456	123815452	36.91
ENSG00000160741	5160.03	-0.215283	0.108781	-1.97904	0.0478118	1	ENST00000303569	CRTC2	1	200186		CRTC2	protein_coding	153947669	153958625	53.2
ENSG00000055917	8662.29	0.254929	0.128854	1.97843	0.04788	1	ENST00000338086	PUM2	2	23369	uc002rdt.1	PUM2	protein_coding	20248691	20352234	37.42
ENSG00000041802	2344.09	-0.394763	0.199674	-1.97704	0.0480372	1	ENST00000265245	LSG1	3	55341	uc003fui.3	LSG1	protein_coding	194640788	194672477	41.69
ENSG00000058866	208.877	0.343558	0.173833	1.97637	0.0481127	1	ENST00000447054	DGKG	3	1608		DGKG	protein_coding	186105668	186362237	44.7
ENSG00000219928	74.3162	0.43846	0.222136	1.97384	0.0483999	1	ENST00000401543	#N/A	9			RP11-40C6.2	processed_pseudogene	87525302	87525475	52.3
ENSG00000096968	1737.84	0.386164	0.195683	1.97342	0.0484478	1	ENST00000476574	JAK2	9	3717		JAK2	protein_coding	4985033	5128183	37.53
ENSG00000131116	740.043	0.382483	0.193834	1.97325	0.0484674	1	ENST00000300811	ZNF428	19	126299	uc002oxa.3	ZNF428	protein_coding	43607219	43619874	52.67
ENSG00000224578	10043.9	-0.206897	0.104995	-1.97053	0.0487771	1	ENST00000562726	HNRNPA1P48	16	664709		HNRNPA1P48	transcribed_processed_pseudogene	51645756	51647132	45.03
ENSG00000126107	2483.96	0.32468	0.164778	1.9704	0.0487923	1	ENST00000486132	HECTD3	1	79654		HECTD3	protein_coding	45002540	45011329	56.66
ENSG00000137200	4826.7	0.216468	0.109866	1.97028	0.0488059	1	ENST00000471097	CMTR1	6	23070		CMTR1	protein_coding	37433219	37482827	45.88
ENSG00000171310	1763.52	-0.303754	0.15417	-1.97026	0.0488091	1	ENST00000550711	CHST11	12	50515		CHST11	protein_coding	104455295	104762014	46.04
ENSG00000273611	1081.28	-0.412429	0.209351	-1.97004	0.0488341	1	ENST00000619730	ZNHIT3	17	9326		ZNHIT3	protein_coding	36486629	36499310	45.77
ENSG00000148834	874.857	-0.452312	0.229596	-1.97004	0.0488341	1	ENST00000470554	GSTO1	10	9446		GSTO1	protein_coding	104235356	104267459	41.43
ENSG00000090470	1705.77	-0.375135	0.190506	-1.96915	0.0489361	1	ENST00000204549	PDCD7	15	10081	uc002aol.3	PDCD7	protein_coding	65117379	65133836	45.72
ENSG00000181222	9880.81	0.189445	0.0962224	1.96883	0.0489729	1	ENST00000617998	POLR2A	17	5430	uc032eso.1	POLR2A	protein_coding	7484366	7514618	49.69
ENSG00000205765	1366.97	-0.423485	0.215137	-1.96844	0.0490172	1	ENST00000505931	C5orf51	5	285636		C5orf51	protein_coding	41904188	41921636	36.01
ENSG00000129071	7752.39	-0.177868	0.0904125	-1.9673	0.0491488	1	ENST00000429544	MBD4	3	8930	uc003emj.2	MBD4	protein_coding	129430944	129440179	39.9
ENSG00000010704	343.79	0.408782	0.207796	1.96723	0.0491569	1	ENST00000397022	HFE	6	3077	uc003nfy.1	HFE	protein_coding	26087281	26098343	44.85
ENSG00000147475	1241.88	-0.4485	0.228536	-1.96249	0.0497055	1	ENST00000397228	ERLIN2	8	11160	uc003xkc.4	ERLIN2	protein_coding	37736599	37759101	44.02

## Sheet: Supplementary table 8
Supplementary table 8. Differentially expressed genes (878) at nominal significance between JIA patients without uveitis, JIA patients with uveitis 1 and JIA patients with uveitis 2
Ensemble Gene ID	baseMean	log2FoldChange	lfcSE	stat	pvalue	padj	ensembl_transcript_id	hgnc_symbol	chromosome_name	entrezgene	ucsc	external_gene_name	gene_biotype	start_position	end_position	percentage_gc_content
ENSG00000104783	5307.36	-0.518159	0.207726	42.3336	6.41757e-10	4.21634e-06	ENST00000600909	KCNN4	19	3783		KCNN4	protein_coding	43766533	43781257	55.16
ENSG00000128886	187.183	-0.805161	0.803773	36.6191	1.11753e-08	NA	ENST00000319359	ELL3	15	80237	uc001zsw.1	ELL3	protein_coding	43772600	43777543	51.92
ENSG00000245532	24793.1	-0.171294	0.135021	35.5218	1.93439e-08	6.35447e-05	ENST00000499732	NEAT1	11	NA	uc010rog.2	NEAT1	lincRNA	65422774	65445540	44.06
ENSG00000007516	4636.17	-0.730268	0.285327	33.3363	5.76922e-08	0.000126346	ENST00000426824	BAIAP3	16	8938	uc010uuz.2	BAIAP3	protein_coding	1333601	1349441	65.72
ENSG00000103335	8838.41	-0.127494	0.120885	32.4498	8.98683e-08	0.000147609	ENST00000518793	PIEZO1	16	9780		PIEZO1	protein_coding	88715343	88785211	61.99
ENSG00000265206	5940.18	-0.108524	0.158332	31.9211	1.17062e-07	0.000153819	ENST00000579003		17	NA		RP5-1171I10.5	antisense	58330884	58332508	63.57
ENSG00000144711	14706.2	-0.0457027	0.0817238	31.2233	1.65934e-07	0.000181698	ENST00000273221	IQSEC1	3	9922	uc003bxt.3	IQSEC1	protein_coding	12897220	13073117	54.36
ENSG00000084234	13578	0.0591637	0.175209	28.7217	5.79631e-07	0.00049676	ENST00000532456	APLP2	11	334		APLP2	protein_coding	130069837	130144811	43.6
ENSG00000150907	6909.29	0.23183	0.14248	28.6365	6.04882e-07	0.00049676	ENST00000379561	FOXO1	13	2308	uc001uxl.4	FOXO1	protein_coding	40555667	40666597	41.99
ENSG00000077238	56510.5	-0.0304028	0.168086	27.9897	8.35823e-07	0.000610151	ENST00000566117	IL4R	16	3566		IL4R	protein_coding	27313668	27364778	49.92
ENSG00000124942	61328.6	-0.150478	0.158342	26.6807	1.60825e-06	0.00102816	ENST00000530124	AHNAK	11	79026		AHNAK	protein_coding	62433542	62556235	50.05
ENSG00000100721	23502.9	0.18854	0.183503	26.5447	1.72143e-06	0.00102816	ENST00000554012	TCL1A	14	8115	uc001yfc.4	TCL1A	protein_coding	95709967	95714196	50.31
ENSG00000150093	6467.41	-0.174968	0.256009	25.7777	2.52604e-06	0.00138301	ENST00000302278	ITGB1	10	3688	uc001iwt.4	ITGB1	protein_coding	32900319	33005792	39.15
ENSG00000264024	32.3949	-0.75596	0.909467	25.0157	3.69758e-06	NA	ENST00000581070		14	NA		AL901608.1	miRNA	105711923	105711992	70
ENSG00000211898	48043.9	0.178267	0.13865	24.7477	4.22761e-06	0.00213657	ENST00000390556	IGHD	14	NA	uc032bnb.1	IGHD	IG_C_gene	105836765	105845678	59.36
ENSG00000104921	16349.7	-0.153148	0.14691	23.6342	7.37747e-06	0.00346214	ENST00000597312	FCER2	19	2208		FCER2	protein_coding	7688758	7702146	53.51
ENSG00000067560	16800	-0.136535	0.0703323	23.2977	8.7292e-06	0.00382267	ENST00000418115	RHOA	3	387	uc003cwu.3	RHOA	protein_coding	49359145	49412998	46.57
ENSG00000169499	22450.7	0.0956243	0.107515	23.169	9.3094e-06	0.00382267	ENST00000521746	PLEKHA2	8	59339	uc033bis.1	PLEKHA2	protein_coding	38901235	38973909	46.54
ENSG00000147535	15707	0.0636822	0.148543	21.6839	1.95611e-05	0.00755978	ENST00000529359	PPAPDC1B	8	84513	uc003xle.4	PPAPDC1B	protein_coding	38263130	38269243	45.35
ENSG00000015171	3097.27	0.506831	0.175612	21.5365	2.10574e-05	0.00768595	ENST00000439456	ZMYND11	10	10771		ZMYND11	protein_coding	134465	254637	37.8
ENSG00000136193	3859.82	-0.0043852	0.206591	21.0484	2.68777e-05	0.00892258	ENST00000242059	SCRN1	7	9805	uc003tak.3	SCRN1	protein_coding	29920103	29990289	43.91
ENSG00000196924	47853.8	-0.0870232	0.0867405	21.0274	2.71616e-05	0.00892258	ENST00000420627	FLNA	X	2316	uc004fkk.2	FLNA	protein_coding	154348524	154374638	62.28
ENSG00000196235	9235.93	-0.145557	0.0756641	20.6047	3.35547e-05	0.0104978	ENST00000594990	SUPT5H	19	6829		SUPT5H	protein_coding	39436156	39476670	51.42
ENSG00000253209	32.4179	3.18623	1.11975	20.4176	3.68447e-05	NA	ENST00000523210	IGHV3-65	14	NA		IGHV3-65	IG_V_pseudogene	106666092	106666532	49.89
ENSG00000112182	10366.5	0.00578459	0.130571	20.3788	3.75667e-05	0.0112188	ENST00000257749	BACH2	6	60468	uc011eab.2	BACH2	protein_coding	89926529	90296908	40.5
ENSG00000140853	15558	-0.0193174	0.151109	20.2081	4.09136e-05	0.0116871	ENST00000539881	NLRC5	16	84166		NLRC5	protein_coding	56989485	57083531	49.44
ENSG00000131844	2207.44	-0.385341	0.207392	19.9314	4.69851e-05	0.0120085	ENST00000512218	MCCC2	5	64087	uc003kbs.4	MCCC2	protein_coding	71587288	71658704	41.2
ENSG00000165572	160.114	-0.552353	1.19508	19.9269	4.70906e-05	NA	ENST00000379485	KBTBD6	13	89890	uc001uxu.1	KBTBD6	protein_coding	41127569	41132746	42.89
ENSG00000197226	7102.77	0.0546655	0.138347	19.9176	4.73088e-05	0.0120085	ENST00000518085	TBC1D9B	5	23061		TBC1D9B	protein_coding	179862066	179907859	54.22
ENSG00000165119	20121.7	0.0279087	0.0859873	19.9086	4.7522e-05	0.0120085	ENST00000376281	HNRNPK	9	3190	uc004anl.4	HNRNPK	protein_coding	83968083	83980616	39.12
ENSG00000196405	18719.8	0.155826	0.091864	19.6513	5.40481e-05	0.0131517	ENST00000402714	EVL	14	51466	uc001ygt.3	EVL	protein_coding	99971449	100144236	45.48
ENSG00000087266	10785.7	-0.182777	0.161716	19.1041	7.1055e-05	0.0166725	ENST00000452765	SH3BP2	4	6452	uc003gfi.4	SH3BP2	protein_coding	2793023	2841098	59.23
ENSG00000254470	1899.19	-1.11386	0.255447	18.9113	7.82447e-05	0.0177265	ENST00000532090	AP5B1	11	91056	uc031qbm.1	AP5B1	protein_coding	65775893	65780802	62.81
ENSG00000037280	56.8549	4.70013	1.75935	18.8767	7.96105e-05	NA	ENST00000261937	FLT4	5	2324	uc003mlz.4	FLT4	protein_coding	180601506	180649624	60.24
ENSG00000277363	8.97378	6.1188	1.52661	18.7417	8.5173e-05	NA	ENST00000617146	SRCIN1	17	80725	uc002hqd.3	SRCIN1	protein_coding	38530016	38605930	56.68
ENSG00000136938	6472.61	-0.0366985	0.111779	18.6384	8.96847e-05	0.019641	ENST00000339399	ANP32B	9	10541	uc004aya.3	ANP32B	protein_coding	97983361	98015943	43.52
ENSG00000083223	3022.23	0.0133964	0.121605	17.7534	0.000139602	0.0271556	ENST00000277141	ZCCHC6	9	79670	uc004aoq.3	ZCCHC6	protein_coding	86287733	86354454	37.99
ENSG00000151651	7578.32	-0.247838	0.139457	17.7529	0.000139637	0.0271556	ENST00000445355	ADAM8	10	101	uc021qbe.1	ADAM8	protein_coding	133262403	133276868	63.75
ENSG00000133056	8871.58	0.163381	0.178358	17.6963	0.000143649	0.0271556	ENST00000367187	PIK3C2B	1	5287	uc001haw.3	PIK3C2B	protein_coding	204422628	204494724	49.35
ENSG00000188404	35890.2	-0.119813	0.104009	17.6833	0.000144587	0.0271556	ENST00000236147	SELL	1	6402	uc001ggk.3	SELL	protein_coding	169690667	169711698	38.85
ENSG00000106537	5965.45	0.240579	0.174339	17.6822	0.000144664	0.0271556	ENST00000262067	TSPAN13	7	27075	uc003stq.3	TSPAN13	protein_coding	16753535	16784536	39.23
ENSG00000240505	3138.33	-0.0278082	0.350236	17.5473	0.000154754	0.0282426	ENST00000584950	TNFRSF13B	17	23495		TNFRSF13B	protein_coding	16929816	16972118	48.46
ENSG00000183022	73.1191	0.944448	0.877192	17.4532	0.000162215	NA	ENST00000330554	TPM3P8	2	NA		TPM3P8	processed_pseudogene	230573167	230573809	47.9
ENSG00000103811	7679.01	-0.510103	0.147073	17.3921	0.000167245	0.0296972	ENST00000220166	CTSH	15	1512	uc021srk.1	CTSH	protein_coding	78921058	78949574	52.42
ENSG00000177311	2206.69	-0.0068147	0.312898	17.1913	0.00018491	0.03197	ENST00000509842	ZBTB38	3	253461	uc003etw.3	ZBTB38	protein_coding	141324213	141449792	42.29
ENSG00000126353	6062.29	-0.224818	0.183592	16.9684	0.000206709	0.0348225	ENST00000246657	CCR7	17	1236	uc002huw.3	CCR7	protein_coding	40553769	40565472	53.29
ENSG00000165055	1010.05	-0.480697	0.303599	16.7403	0.000231681	0.0380535	ENST00000482555	METTL2B	7	55798		METTL2B	protein_coding	128476729	128506602	45.29
ENSG00000184445	1864.63	0.315746	0.237917	16.6207	0.000245955	0.0394128	ENST00000535410	KNTC1	12	9735		KNTC1	protein_coding	122527246	122626396	41.24
ENSG00000145331	115.553	0.971967	1.23336	16.5858	0.000250289	NA	ENST00000394877	TRMT10A	4	93587	uc003hva.4	TRMT10A	protein_coding	99546709	99564032	35.04
ENSG00000255310	830.22	-0.0442989	0.305839	16.1289	0.000314525	NA	ENST00000530248		8	NA		AF131215.2	sense_intronic	11107788	11109726	42.08
ENSG00000178082	157.438	-4.69015	1.1161	15.8659	0.000358721	NA	ENST00000580812	TWF1P1	17	NA		TWF1P1	processed_pseudogene	29203426	29204474	39.47
ENSG00000130702	5622	0.0841862	0.166823	15.7094	0.000387915	0.0594032	ENST00000492698	LAMA5	20	3911		LAMA5	protein_coding	62307955	62367312	61.89
ENSG00000254709	4397.58	-0.114369	0.260727	15.6741	0.000394835	0.0594032	ENST00000526893	IGLL5	22	100423062	uc011aiw.2	IGLL5	protein_coding	22734620	22896107	45.55
ENSG00000168411	2070.83	0.0988104	0.196252	15.659	0.00039783	0.0594032	ENST00000361070	RFWD3	16	55159	uc002fda.3	RFWD3	protein_coding	74621394	74666881	43.53
ENSG00000235688	47.9602	-9.26047	2.14047	15.5852	0.000412769	NA	ENST00000456949		2	NA		AC116614.1	antisense	949634	950274	57.57
ENSG00000140332	5089.27	-0.0613268	0.216666	15.3988	0.000453091	0.0647302	ENST00000558939	TLE3	15	7090	uc002asm.3	TLE3	protein_coding	70047790	70098176	52.15
ENSG00000058668	1033.65	-0.653467	0.293542	15.3915	0.000454765	0.0647302	ENST00000357681	ATP2B4	1	493	uc001gzw.3	ATP2B4	protein_coding	203626561	203744081	46.5
ENSG00000124772	11135.3	-0.00918737	0.136636	15.3553	0.000463062	0.0647302	ENST00000459703	CPNE5	6	57699		CPNE5	protein_coding	36740775	36840002	51.81
ENSG00000134250	12115.4	-0.0632666	0.139235	15.0139	0.00054926	0.0751799	ENST00000256646	NOTCH2	1	4853	uc001eik.3	NOTCH2	protein_coding	119911553	120069626	39.74
ENSG00000105612	874.642	-0.279638	0.288549	14.9366	0.000570884	NA	ENST00000222219	DNASE2	19	1777	uc002mvn.1	DNASE2	protein_coding	12875211	12881468	52.62
ENSG00000214203	26.0234	-3.2787	0.952337	14.9147	0.00057718	NA	ENST00000482189	RPS4XP1	12	NA		RPS4XP1	processed_pseudogene	100009052	100009838	45.62
ENSG00000143318	29.265	-0.888396	2.39191	14.8561	0.000594333	NA	ENST00000368078	CASQ1	1	844	uc010pja.2	CASQ1	protein_coding	160190556	160201886	50.52
ENSG00000048471	7694.12	-0.0772831	0.153076	14.7677	0.000621209	0.0815629	ENST00000569801	SNX29	16	92017		SNX29	protein_coding	11976737	12574289	47.13
ENSG00000163399	5369.07	-0.538607	0.20357	14.7327	0.000632172	0.0815629	ENST00000418797	ATP1A1	1	476		ATP1A1	protein_coding	116372668	116410261	44.46
ENSG00000165025	22064.4	0.0861785	0.120643	14.7296	0.000633137	0.0815629	ENST00000375754	SYK	9	6850	uc004aqz.3	SYK	protein_coding	90801787	90898549	44.17
ENSG00000213024	3241.22	-0.445717	0.166331	14.6833	0.000647995	0.0818717	ENST00000422090	NUP62	19	23636	uc002pqz.4	NUP62	protein_coding	49906825	49929763	54.29
ENSG00000110777	16184.9	0.091615	0.102925	14.6061	0.000673471	0.083485	ENST00000393067	POU2AF1	11	5450	uc001plg.4	POU2AF1	protein_coding	111352252	111455630	45.99
ENSG00000076356	89.191	-0.360168	1.17896	14.5178	0.000703877	NA	ENST00000367033	PLXNA2	1	5362	uc001hgz.3	PLXNA2	protein_coding	208022242	208244320	47.98
ENSG00000144214	127.592	-1.31842	1.50758	14.4307	0.000735213	NA	ENST00000308528	LYG1	2	129530	uc002szy.3	LYG1	protein_coding	99284238	99304742	43.24
ENSG00000156261	4658.28	-0.234252	0.134134	14.2543	0.000803024	0.0977013	ENST00000432178	CCT8	21	10694		CCT8	protein_coding	29055805	29073797	38.32
ENSG00000057252	1039.31	-0.848296	0.249896	14.193	0.000827998	0.0984541	ENST00000367619	SOAT1	1	6646	uc001gml.3	SOAT1	protein_coding	179293714	179358680	39.63
ENSG00000253239	98.3426	-1.96053	1.53217	14.1763	0.00083494	NA	ENST00000523272	IGLVI-70	22	NA	uc002zvv.3	IGLVI-70	IG_V_pseudogene	22026076	22026593	54.25
ENSG00000135144	3246.45	-0.0255171	0.270563	14.1662	0.000839182	0.0984541	ENST00000548759	DTX1	12	1840		DTX1	protein_coding	113056709	113098028	53.96
ENSG00000187210	2197.31	0.0952355	0.290577	14.1164	0.000860317	0.0991629	ENST00000488136	GCNT1	9	2650		GCNT1	protein_coding	76419850	76507416	42.83
ENSG00000242534	86.3099	1.24496	0.994417	14.0693	0.000880842	NA	ENST00000453166	IGKV2D-28	2	NA		IGKV2D-28	IG_V_gene	89959979	89960754	43.43
ENSG00000135048	4496.01	-0.395976	0.171649	13.9432	0.000938143	0.106269	ENST00000377044	TMEM2	9	23670	uc011lsa.1	TMEM2	protein_coding	71683366	71816690	40.46
ENSG00000118997	17.8704	4.06942	1.3385	13.9029	0.000957267	NA	ENST00000409063	DNAH7	2	56171	uc002uti.4	DNAH7	protein_coding	195737703	196068812	37.1
ENSG00000103522	1718.13	0.520973	0.305063	13.8725	0.000971892	0.108226	ENST00000337929	IL21R	16	50615	uc002doq.2	IL21R	protein_coding	27402162	27452042	47.11
ENSG00000219102	45.7613	-5.46103	1.56737	13.7189	0.00104949	NA	ENST00000437410	HNRNPA3P12	1	NA		HNRNPA3P12	processed_pseudogene	53974969	53976031	43.65
ENSG00000081052	1734.61	0.0384743	0.39554	13.594	0.00111712	0.122325	ENST00000396625	COL4A4	2	1286	uc032oul.1	COL4A4	protein_coding	227002711	227164113	40.93
ENSG00000122188	1280.38	-0.0966946	0.322864	13.4552	0.00119738	0.127183	ENST00000442561	LAX1	1	54900	uc001haa.3	LAX1	protein_coding	203765176	203776233	46.18
ENSG00000139921	1655.74	0.146563	0.174736	13.4505	0.0012002	0.127183	ENST00000555574	TMX1	14	81542		TMX1	protein_coding	51240162	51257546	36.96
ENSG00000036448	88.6578	1.46194	1.32903	13.4408	0.00120607	NA	ENST00000262113	MYOM2	8	9172	uc033azy.1	MYOM2	protein_coding	2045040	2165552	46.64
ENSG00000135945	2033.68	-0.688961	0.229645	13.2913	0.00129966	0.134294	ENST00000393445	REV1	2	51455	uc002tac.3	REV1	protein_coding	99400475	99490035	39.33
ENSG00000235750	13480.5	0.094639	0.118267	13.2782	0.00130819	0.134294	ENST00000423313	KIAA0040	1	9674	uc009wws.2	KIAA0040	protein_coding	175156987	175192999	44.88
ENSG00000234369	68.2187	-3.88605	1.13318	13.248	0.00132812	NA	ENST00000414123	TATDN1P1	10	NA		TATDN1P1	processed_pseudogene	63222155	63223045	35.8
ENSG00000230592	10.1147	4.90535	1.44517	13.2467	0.00132897	NA	ENST00000429844	RPSAP8	X	NA		RPSAP8	processed_pseudogene	100155885	100156773	52.31
ENSG00000259004	77.4173	0.99067	1.49473	13.2391	0.00133405	NA	ENST00000557121		14	101929422		RP11-8L8.2	lincRNA	101120856	101123542	56.35
ENSG00000161929	6674.91	-0.286347	0.223693	13.2381	0.00133468	0.134905	ENST00000574081	SCIMP	17	388325	uc002gbh.3	SCIMP	protein_coding	5208961	5234860	48.5
ENSG00000227492	39.8979	-8.57619	1.85535	13.1975	0.00136204	NA	ENST00000444359		10	NA		RP11-316M21.6	antisense	100229667	100234000	45.85
ENSG00000137312	2699.76	-0.297265	0.238107	13.1754	0.00137721	0.137095	ENST00000487376	FLOT1	6	10211		FLOT1	protein_coding	30727709	30742733	49.72
ENSG00000272240	85.8262	-0.104482	1.4003	13.1513	0.00139388	NA	ENST00000606572		8	NA		RP5-855D21.1	antisense	234347	234887	43.81
ENSG00000156110	2511.56	-0.198806	0.181143	13.0855	0.00144053	0.141258	ENST00000286621	ADK	10	132	uc001jwi.3	ADK	protein_coding	74151185	74709303	37.42
ENSG00000270419	40.6264	1.53511	1.45729	12.9718	0.00152476	NA	ENST00000604200	CAHM	6	100526820	uc021zib.1	CAHM	lincRNA	163413065	163413960	60.94
ENSG00000141258	6834.97	-0.580474	0.158892	12.9543	0.00153818	0.148615	ENST00000572875	SGSM2	17	9905		SGSM2	protein_coding	2337498	2381058	54.99
ENSG00000132294	3118.15	-0.117103	0.20299	12.8886	0.00158957	0.151355	ENST00000254624	EFR3A	8	23167	uc003yte.3	EFR3A	protein_coding	131904088	132013642	35.32
ENSG00000185033	14806	-0.00458981	0.0950115	12.8437	0.00162562	0.152576	ENST00000559322	SEMA4B	15	10509		SEMA4B	protein_coding	90160604	90229679	50.67
ENSG00000112576	5652.67	-0.763274	0.21733	12.7264	0.00172383	0.159515	ENST00000372991	CCND3	6	896	uc003orn.4	CCND3	protein_coding	41934933	42050357	47.06
ENSG00000167107	1962.63	-0.526334	0.294786	12.6401	0.00179984	0.164235	ENST00000510410	ACSF2	17	80221		ACSF2	protein_coding	50426158	50474845	49.96
ENSG00000242660	18.1353	4.47975	1.78184	12.6193	0.00181863	NA	ENST00000495111		17	NA		RP11-1094M14.1	processed_pseudogene	35566517	35566672	39.1
ENSG00000149489	172.949	-5.29995	1.17936	12.5647	0.00186897	NA	ENST00000525801	ROM1	11	6094		ROM1	protein_coding	62611722	62615120	63.4
ENSG00000162909	5195.96	-0.148653	0.193508	12.5552	0.00187793	0.167109	ENST00000434648	CAPN2	1	824		CAPN2	protein_coding	223701593	223776018	48.73
ENSG00000070770	2759.52	-0.526975	0.168202	12.5408	0.00189143	0.167109	ENST00000566813	CSNK2A2	16	1459		CSNK2A2	protein_coding	58157907	58197920	41.31
ENSG00000153048	1414.59	-0.461758	0.255448	12.5238	0.00190763	0.167109	ENST00000396593	CARHSP1	16	23589	uc002czh.2	CARHSP1	protein_coding	8852942	8869012	55.97
ENSG00000229914	35.6486	-8.8333	2.38	12.4882	0.00194192	NA	ENST00000439139		1	NA		RP11-404O13.4	processed_pseudogene	158195633	158196131	53.31
ENSG00000175048	1057.85	-0.245208	0.312553	12.4593	0.00197016	0.167966	ENST00000414563	ZDHHC14	6	79683	uc003qqs.3	ZDHHC14	protein_coding	157381133	157678146	45.59
ENSG00000251495	47.6666	2.7503	0.974135	12.4473	0.00198203	NA	ENST00000510729	PPIAP11	5	NA		PPIAP11	processed_pseudogene	82009602	82010094	48.68
ENSG00000116679	3712.26	-0.352448	0.169447	12.4297	0.00199951	0.167966	ENST00000480769	IVNS1ABP	1	10625		IVNS1ABP	protein_coding	185296388	185317329	37.35
ENSG00000118523	75.4088	2.7281	1.62607	12.425	0.0020042	NA	ENST00000367976	CTGF	6	1490	uc003qcz.3	CTGF	protein_coding	131948176	131951373	52.28
ENSG00000169925	1850.49	0.119183	0.236688	12.4249	0.00200431	0.167966	ENST00000303407	BRD3	9	8019	uc004cew.3	BRD3	protein_coding	134030305	134068535	57.61
ENSG00000164190	6130.59	-0.0315173	0.113681	12.4096	0.00201969	0.167966	ENST00000282516	NIPBL	5	25836	uc003jkl.4	NIPBL	protein_coding	36876759	37066413	35.04
ENSG00000147162	27670.4	-0.078909	0.108424	12.3426	0.00208848	0.171349	ENST00000373719	OGT	X	8473	uc004eaa.2	OGT	protein_coding	71533083	71575897	40.6
ENSG00000175514	29.4524	7.06192	1.99686	12.3231	0.00210895	NA	ENST00000312457	GPR152	11	390212	uc001olm.3	GPR152	protein_coding	67451301	67452729	65.78
ENSG00000184588	8126.78	0.194561	0.154518	12.3197	0.00211253	0.171349	ENST00000329654	PDE4B	1	5142	uc001dcn.3	PDE4B	protein_coding	65792514	66374579	37.45
ENSG00000239470	8.01174	-0.543468	1.18021	12.3115	0.00212124	NA	ENST00000472300		11	NA		RP11-16F15.2	processed_pseudogene	9660438	9660920	43.89
ENSG00000038274	6119.31	-0.309515	0.145948	12.2713	0.00216431	0.172262	ENST00000280969	MAT2B	5	27430	uc003lzj.4	MAT2B	protein_coding	163503114	163519336	38.25
ENSG00000143013	1838.02	-0.189367	0.213777	12.2515	0.00218583	0.172262	ENST00000370544	LMO4	1	8543	uc001dmi.4	LMO4	protein_coding	87328468	87348923	42.55
ENSG00000179981	1149.34	-0.863662	0.320081	12.2364	0.00220244	0.172262	ENST00000322038	TSHZ1	18	10194	uc002lly.4	TSHZ1	protein_coding	75210755	75289950	44.58
ENSG00000163697	333.65	-0.389577	0.861753	12.2266	0.00221328	NA	ENST00000295974	APBB2	4	323	uc003gvn.3	APBB2	protein_coding	40810027	41216714	42.41
ENSG00000145734	5021.24	-0.0653225	0.142382	12.1404	0.00231072	0.178605	ENST00000358731	BDP1	5	55814	uc003kbp.1	BDP1	protein_coding	71455615	71567820	39.84
ENSG00000227077	100.6	1.49969	0.665173	12.128	0.00232508	NA	ENST00000442562		17	NA	uc032ewx.1	AC107983.4	processed_pseudogene	18572752	18572961	62.38
ENSG00000166295	8687.11	-0.210207	0.128457	12.0908	0.00236878	0.179873	ENST00000478193	ANAPC16	10	119504	uc021psq.1	ANAPC16	protein_coding	72216000	72235860	43.46
ENSG00000182180	1642.84	0.442779	0.204895	12.0501	0.00241746	0.179873	ENST00000479005	MRPS16	10	51021	uc001jtt.1	MRPS16	protein_coding	73248843	73252693	47.47
ENSG00000144118	2660.84	0.71826	0.224793	12.0465	0.00242174	0.179873	ENST00000447591	RALB	2	5899	uc010yys.2	RALB	protein_coding	120240064	120294713	46.37
ENSG00000100092	1973.92	-0.145516	0.2189	12.0343	0.00243664	0.179873	ENST00000417536	SH3BP1	22	23616	uc003ati.3	SH3BP1	protein_coding	37634654	37666932	56.32
ENSG00000138688	6638.13	-0.118335	0.162854	11.9729	0.00251255	0.181669	ENST00000264501	KIAA1109	4	84162	uc003ieh.3	KIAA1109	protein_coding	122152333	122362758	34.76
ENSG00000196352	5276.14	0.366495	0.140084	11.97	0.00251626	0.181669	ENST00000367064	CD55	1	1604	uc001hfq.4	CD55	protein_coding	207321508	207360966	36.33
ENSG00000139626	5838.71	-0.00509412	0.174041	11.9136	0.00258821	0.184832	ENST00000267082	ITGB7	12	3695	uc001scc.4	ITGB7	protein_coding	53191318	53207307	51.11
ENSG00000114439	5795.55	0.377337	0.124594	11.8312	0.00269698	0.190529	ENST00000415149	BBX	3	56987	uc003dwk.5	BBX	protein_coding	107522936	107811324	36.95
ENSG00000160710	13762.4	0.0157458	0.0882308	11.7528	0.00280486	0.194419	ENST00000368474	ADAR	1	103	uc001ffh.3	ADAR	protein_coding	154582062	154627999	45.35
ENSG00000128438	3518.38	-0.22825	0.277136	11.7446	0.00281645	0.194419	ENST00000261651	TBC1D27	17	NA	uc002gqr.1	TBC1D27	transcribed_unprocessed_pseudogene	16922915	16934839	60.38
ENSG00000112137	2913.7	0.0485066	0.238746	11.7273	0.00284082	0.194419	ENST00000332995	PHACTR1	6	221692	uc010jpc.3	PHACTR1	protein_coding	12716805	13290484	41.2
ENSG00000115956	7143.38	0.183565	0.150091	11.7057	0.00287163	0.194501	ENST00000234313	PLEK	2	5341	uc002sen.4	PLEK	protein_coding	68365173	68397453	41.22
ENSG00000268154	73.9761	-1.30482	1.61196	11.6595	0.00293881	NA	ENST00000600454		1	NA		Metazoa_SRP	misc_RNA	154950210	154950492	55.48
ENSG00000182871	1486.96	-1.13962	0.636946	11.653	0.00294844	0.194935	ENST00000400337	COL18A1	21	80781	uc032qce.1	COL18A1	protein_coding	45405137	45513720	59.66
ENSG00000138496	2808.48	0.0636509	0.233492	11.6508	0.00295155	0.194935	ENST00000477522	PARP9	3	83666	uc003efi.4	PARP9	protein_coding	122527924	122564577	42.46
ENSG00000152558	10411.9	0.173461	0.122097	11.6404	0.00296705	0.194935	ENST00000361236	TMEM123	11	114908	uc009yxc.3	TMEM123	protein_coding	102396332	102470384	40.62
ENSG00000099800	1027.12	-0.92783	0.325581	11.608	0.00301548	0.195658	ENST00000215570	TIMM13	19	26517	uc002lvx.2	TIMM13	protein_coding	2425624	2427894	64.99
ENSG00000105254	2874.03	0.073913	0.179911	11.5934	0.00303761	0.195658	ENST00000593075	TBCB	19	1155		TBCB	protein_coding	36114289	36125947	55.29
ENSG00000227288	187.088	0.033099	1.08414	11.5854	0.0030498	NA	ENST00000448213		1	NA		RP5-837I24.1	processed_pseudogene	81501794	81503468	57.73
ENSG00000197249	116.493	0.147079	1.47581	11.5701	0.00307308	NA	ENST00000440909	SERPINA1	14	5265	uc001ycz.4	SERPINA1	protein_coding	94376747	94390693	51.8
ENSG00000034510	37156.9	0.117026	0.0989501	11.5268	0.00314049	0.200321	ENST00000233143	TMSB10	2	9168	uc002sow.1	TMSB10	protein_coding	84905625	84906675	63.37
ENSG00000258613	92.7861	3.38367	1.26723	11.4836	0.00320905	NA	ENST00000557463	RPL21P7	14	NA		RPL21P7	processed_pseudogene	65266638	65267690	44.92
ENSG00000169031	2419.12	-0.291327	0.340327	11.4326	0.00329184	0.207956	ENST00000396578	COL4A3	2	1285	uc002vom.2	COL4A3	protein_coding	227164565	227314792	39.87
ENSG00000158683	95.0165	0.377521	1.38887	11.3981	0.00334908	NA	ENST00000289672	PKD1L1	7	168507	uc003tny.2	PKD1L1	protein_coding	47774652	47948491	44.25
ENSG00000113916	2120.16	-0.0551167	0.245731	11.3839	0.00337303	0.211055	ENST00000406870	BCL6	3	604	uc003frq.2	BCL6	protein_coding	187721377	187745727	47.68
ENSG00000211648	2891.03	-1.65831	0.606179	11.335	0.00345656	0.214242	ENST00000390294	IGLV1-47	22	NA		IGLV1-47	IG_V_gene	22357739	22358260	57.66
ENSG00000169762	5307.65	-0.0744093	0.187825	11.2857	0.00354284	0.214823	ENST00000405303	TAPT1	4	202018	uc010ied.1	TAPT1	protein_coding	16160505	16227410	38.85
ENSG00000004468	2549.22	0.153769	0.248312	11.2803	0.00355237	0.214823	ENST00000502843	CD38	4	952	uc003gol.1	CD38	protein_coding	15778275	15853230	41.09
ENSG00000102575	3920.69	0.162949	0.207219	11.2737	0.00356404	0.214823	ENST00000218758	ACP5	19	54	uc002msi.4	ACP5	protein_coding	11574660	11579008	58.59
ENSG00000107331	2692.58	-0.138547	0.297037	11.2491	0.00360822	0.215509	ENST00000341511	ABCA2	9	20	uc033dll.1	ABCA2	protein_coding	137007227	137028922	66.66
ENSG00000211899	306927	0.0126525	0.115824	11.219	0.00366297	0.216808	ENST00000390559	IGHM	14	NA		IGHM	IG_C_gene	105854220	106235572	45.06
ENSG00000118939	72.5672	-0.864871	1.62263	11.1546	0.00378268	NA	ENST00000471792	UCHL3	13	7347		UCHL3	protein_coding	75549480	75606020	35.78
ENSG00000007038	99.6232	-0.0385698	1.55446	11.139	0.00381247	NA	ENST00000450020	PRSS21	16	10942	uc002crr.4	PRSS21	protein_coding	2817180	2826304	55.65
ENSG00000110665	3847.12	0.185378	0.230347	11.1306	0.00382834	0.224573	ENST00000381153	C11orf21	11	29125	uc001lvv.2	C11orf21	protein_coding	2295645	2303049	60.61
ENSG00000121966	68821.4	0.102274	0.183556	11.0561	0.00397373	0.231039	ENST00000409817	CXCR4	2	7852	uc002tuy.3	CXCR4	protein_coding	136114349	136118165	52.06
ENSG00000112280	19.452	-7.58762	2.10642	11.0463	0.0039932	NA	ENST00000357250	COL9A1	6	1297	uc003pfg.4	COL9A1	protein_coding	70215061	70303083	37.98
ENSG00000168010	10008.3	0.0832463	0.105383	11.0338	0.00401826	0.231579	ENST00000321297	ATG16L2	11	89849	uc001otd.3	ATG16L2	protein_coding	72814308	72843674	52.8
ENSG00000167261	4330.48	-0.216362	0.189949	10.9946	0.00409791	0.233438	ENST00000393847	DPEP2	16	64174	uc002eve.4	DPEP2	protein_coding	67987394	68000586	54.36
ENSG00000205517	74.5469	-8.52891	2.0229	10.9833	0.00412112	NA	ENST00000562663	RGL3	19	57139	uc002mrp.2	RGL3	protein_coding	11384341	11419342	50.52
ENSG00000101367	3625.56	-0.445643	0.206121	10.983	0.00412159	0.233438	ENST00000375571	MAPRE1	20	22919	uc002wyh.3	MAPRE1	protein_coding	32819893	32850405	44.44
ENSG00000233837	27.217	3.49322	1.03664	10.9806	0.00412657	NA	ENST00000457262	EIF3LP2	10	NA		EIF3LP2	processed_pseudogene	42566677	42567483	49.69
ENSG00000166974	4365.02	0.309263	0.15772	10.9562	0.00417725	0.234569	ENST00000591734	MAPRE2	18	10982	uc010xcb.3	MAPRE2	protein_coding	34976928	35143470	39.48
ENSG00000234176	8.06734	-3.21757	1.19637	10.9386	0.00421416	NA	ENST00000425843	HSPA8P1	X	NA		HSPA8P1	processed_pseudogene	121203182	121205014	44.08
ENSG00000229132	725.682	-0.246721	0.463682	10.9211	0.00425111	NA	ENST00000428832	EIF4A1P10	X	NA		EIF4A1P10	processed_pseudogene	92113246	92114461	48.93
ENSG00000240563	45.573	-7.73898	2.24502	10.9121	0.00427041	NA	ENST00000498273	L1TD1	1	54596	uc001dae.5	L1TD1	protein_coding	62194831	62212328	43.27
ENSG00000137310	905.2	-0.570157	0.310818	10.8832	0.00433247	NA	ENST00000376257	TCF19	6	6941	uc003nst.3	TCF19	protein_coding	31158542	31167159	51.1
ENSG00000169696	1962.97	0.291841	0.165062	10.8057	0.00450364	0.248412	ENST00000581484	ASPSCR1	17	79058		ASPSCR1	protein_coding	81976807	82017406	60.76
ENSG00000109917	2619.28	-0.272597	0.177076	10.7975	0.00452232	0.248412	ENST00000227322	ZPR1	11	8882	uc001ppp.3	ZPR1	protein_coding	116773799	116788050	44.53
ENSG00000149418	3349.68	-0.654726	0.263635	10.7909	0.00453721	0.248412	ENST00000278742	ST14	11	6768	uc001qfw.3	ST14	protein_coding	130159562	130210376	51.95
ENSG00000221823	1963.54	0.151261	0.223932	10.7741	0.00457555	0.248441	ENST00000234310	PPP3R1	2	5534	uc002sei.1	PPP3R1	protein_coding	68178857	68256237	37.41
ENSG00000133639	33408.1	0.077189	0.141197	10.7508	0.004629	0.249283	ENST00000256015	BTG1	12	694	uc001tby.3	BTG1	protein_coding	92140278	92145897	42.46
ENSG00000145349	4499.87	0.075382	0.22234	10.7279	0.00468233	0.250105	ENST00000394524	CAMK2D	4	817	uc003ibj.3	CAMK2D	protein_coding	113451032	113761927	35.99
ENSG00000213280	23.3707	-1.87447	0.623957	10.7225	0.00469499	NA	ENST00000393266		7	NA		RP11-212P7.1	processed_pseudogene	128570241	128570688	52.9
ENSG00000187621	3313.17	-0.00182841	0.286127	10.6978	0.00475332	0.250343	ENST00000357168	TCL6	14	27004	uc001yep.1	TCL6	processed_transcript	95650498	95679833	46.37
ENSG00000118307	35.4981	7.78382	2.10595	10.6807	0.00479416	NA	ENST00000556006	CASC1	12	55259	uc001rgl.3	CASC1	protein_coding	25108420	25195162	38.2
ENSG00000176953	4912.83	0.167861	0.113424	10.6721	0.00481483	0.250343	ENST00000564978	NFATC2IP	16	84901	uc002drt.3	NFATC2IP	protein_coding	28950807	28967097	49.47
ENSG00000115107	53.6132	-8.85708	1.95816	10.6662	0.00482907	NA	ENST00000393110	STEAP3	2	55240	uc002tlq.3	STEAP3	protein_coding	119223831	119265652	51.67
ENSG00000167106	4704.61	-0.146627	0.166827	10.6622	0.00483866	0.250343	ENST00000373095	FAM102A	9	399665	uc004bsx.2	FAM102A	protein_coding	127940579	127980513	55.6
ENSG00000213145	1624.45	-0.164401	0.324403	10.6493	0.00486995	0.250343	ENST00000496700	CRIP1	14	1396		CRIP1	protein_coding	105486317	105488947	68.07
ENSG00000103275	5881.93	-0.372859	0.115499	10.6361	0.00490231	0.250343	ENST00000355803	UBE2I	16	7329	uc002cld.2	UBE2I	protein_coding	1308880	1327018	59.46
ENSG00000173581	1490.12	-0.274433	0.324467	10.6279	0.00492241	0.250343	ENST00000592996	CCDC106	19	29903	uc002qls.3	CCDC106	protein_coding	55641062	55653161	61.17
ENSG00000211897	5959.23	-0.0386029	0.33987	10.6153	0.00495352	0.250343	ENST00000390551	IGHG3	14	NA		IGHG3	IG_C_gene	105769102	106038345	48.99
ENSG00000151276	19.4426	1.63425	2.68567	10.584	0.00503161	NA	ENST00000330909	MAGI1	3	9223	uc003dmm.3	MAGI1	protein_coding	65353525	66038834	40.3
ENSG00000171497	1029.02	-0.0891528	0.23555	10.5434	0.00513479	0.255001	ENST00000307720	PPID	4	5481	uc003iqc.3	PPID	protein_coding	158709134	158723396	38.97
ENSG00000186088	8691.78	-0.154258	0.107913	10.543	0.00513602	0.255001	ENST00000491796	GSAP	7	54103		GSAP	protein_coding	77310751	77416400	40.18
ENSG00000196498	5414.54	-0.00390362	0.163074	10.5328	0.00516213	0.255001	ENST00000405201	NCOR2	12	9612	uc010tbb.2	NCOR2	protein_coding	124324415	124567589	57.37
ENSG00000117601	20.2389	-7.65387	2.3614	10.5306	0.00516795	NA	ENST00000367698	SERPINC1	1	462	uc001gjt.3	SERPINC1	protein_coding	173903804	173917378	46.31
ENSG00000131116	758.917	0.0865272	0.274502	10.526	0.0051798	NA	ENST00000300811	ZNF428	19	126299	uc002oxa.3	ZNF428	protein_coding	43607219	43619874	52.67
ENSG00000135842	849.425	-0.525458	0.609533	10.4907	0.005272	NA	ENST00000417056	FAM129A	1	116496		FAM129A	protein_coding	184790724	184974550	40.12
ENSG00000253364	1554.92	-0.418487	0.388985	10.4619	0.00534834	0.258192	ENST00000460164		14	NA		RP11-731F5.2	lincRNA	105644496	105649057	64.97
ENSG00000234335	66.5865	0.190301	0.718479	10.4565	0.00536292	NA	ENST00000446897	RPS4XP11	10	NA		RPS4XP11	processed_pseudogene	32102522	32103293	45.98
ENSG00000160683	1366.43	-0.494414	0.295705	10.4337	0.00542441	0.258192	ENST00000292174	CXCR5	11	643	uc001pue.4	CXCR5	protein_coding	118883766	118897799	54.19
ENSG00000087448	1199.58	-0.081985	0.358515	10.4143	0.00547717	0.258192	ENST00000381271	KLHL42	12	57542	uc001rij.3	KLHL42	protein_coding	27780020	27803040	43.03
ENSG00000149483	1790.21	0.345013	0.240058	10.4016	0.00551205	0.258192	ENST00000278826	TMEM138	11	51524	uc001nrl.2	TMEM138	protein_coding	61362001	61369509	48.08
ENSG00000158158	1792.79	0.238181	0.336529	10.3863	0.00555456	0.258192	ENST00000377075	CNNM4	2	26504	uc002swx.3	CNNM4	protein_coding	96760902	96811891	50.16
ENSG00000234618	31.7998	1.4969	1.15653	10.3861	0.00555506	NA	ENST00000418207	RPSAP9	9	NA		RPSAP9	processed_pseudogene	76398699	76399586	51.46
ENSG00000203875	5207.64	-0.236174	0.181403	10.3645	0.00561537	0.258192	ENST00000623163	SNHG5	6	NA		SNHG5	processed_transcript	85660950	85678736	40.9
ENSG00000147905	5138.39	0.241372	0.153556	10.3605	0.00562652	0.258192	ENST00000336755	ZCCHC7	9	84186	uc003zzq.3	ZCCHC7	protein_coding	37120539	37358149	36.62
ENSG00000196305	3871.19	-0.0362623	0.151022	10.3588	0.00563141	0.258192	ENST00000375643	IARS	9	3376	uc004art.3	IARS	protein_coding	92210207	92293756	41.23
ENSG00000154822	5127.3	0.136644	0.180001	10.3564	0.00563802	0.258192	ENST00000460467	PLCL2	3	23228		PLCL2	protein_coding	16802651	17090594	39.07
ENSG00000011009	1502.77	-0.454487	0.248551	10.3495	0.00565777	0.258192	ENST00000374514	LYPLA2	1	11313	uc001bht.3	LYPLA2	protein_coding	23790970	23795539	62.39
ENSG00000174106	3704.7	0.0306713	0.135778	10.349	0.00565901	0.258192	ENST00000308330	LEMD3	12	23592	uc001ssl.2	LEMD3	protein_coding	65169571	65248327	35.54
ENSG00000086570	64.845	1.48058	1.7492	10.3429	0.00567642	NA	ENST00000520200	FAT2	5	2196	uc003lud.4	FAT2	protein_coding	151504093	151568944	46.35
ENSG00000117586	86.5539	-0.700693	1.52276	10.3189	0.00574472	NA	ENST00000367718	TNFSF4	1	7292	uc001giv.3	TNFSF4	protein_coding	173183734	173207313	39.89
ENSG00000114416	4632.22	-0.0900407	0.186576	10.314	0.00575899	0.260942	ENST00000469882	FXR1	3	8087		FXR1	protein_coding	180868141	180982753	38.94
ENSG00000233558	27.4478	3.81408	1.242	10.2976	0.00580625	NA	ENST00000435100		6	NA		RP3-486I3.4	processed_pseudogene	116258493	116259115	55.38
ENSG00000164638	20.8641	5.65545	2.06681	10.2193	0.00603821	NA	ENST00000434816	SLC29A4	7	222962		SLC29A4	protein_coding	5274369	5306870	57.52
ENSG00000158301	52.7012	-9.87988	2.49157	10.2142	0.00605362	NA	ENST00000332262	GPRASP2	X	114928	uc004ejm.3	GPRASP2	protein_coding	102712176	102717733	51.49
ENSG00000135655	6389.35	-0.139268	0.120354	10.2102	0.00606568	0.272956	ENST00000353364	USP15	12	9958	uc001srb.2	USP15	protein_coding	62260338	62417431	34.93
ENSG00000167553	234.848	-0.300038	0.987902	10.2008	0.00609426	NA	ENST00000549554	TUBA1C	12	84790		TUBA1C	protein_coding	49188736	49274603	45.2
ENSG00000088340	68.3922	-7.76308	1.78061	10.1853	0.00614161	NA	ENST00000616283	FER1L4	20	NA	uc032pig.1	FER1L4	unitary_pseudogene	35558737	35607562	49.6
ENSG00000155189	2922.83	0.0644842	0.219189	10.1847	0.00614353	0.274578	ENST00000285518	AGPAT5	8	55326	uc003wqo.3	AGPAT5	protein_coding	6708357	6759666	38.61
ENSG00000171467	11868.5	0.0517563	0.108893	10.1231	0.00633586	0.280234	ENST00000607252	ZNF318	6	24149		ZNF318	protein_coding	43307134	43369478	42.92
ENSG00000131115	832.085	0.251368	0.330561	10.1203	0.00634475	NA	ENST00000590871	ZNF227	19	7770		ZNF227	protein_coding	44207547	44237268	41.09
ENSG00000227495	19.524	7.62821	2.43879	10.1184	0.00635049	NA	ENST00000438266		17	102724009		AC109333.10	antisense	5019214	5020093	52.39
ENSG00000105953	3256.82	-0.275974	0.113585	10.1129	0.00636806	0.280234	ENST00000439616	OGDH	7	4967	uc011kby.2	OGDH	protein_coding	44606572	44709066	46.23
ENSG00000181085	13.202	-7.39147	2.2186	10.0878	0.00644858	NA	ENST00000338033	MAPK15	8	225689	uc003yzj.3	MAPK15	protein_coding	143716259	143722458	65.08
ENSG00000115207	2532.51	-0.393429	0.208503	10.0843	0.00645986	0.280234	ENST00000359541	GTF3C2	2	2976	uc002rju.2	GTF3C2	protein_coding	27325849	27357034	46.39
ENSG00000167103	142.14	2.54924	1.80245	10.0802	0.00647325	NA	ENST00000388747	PIP5KL1	9	138429	uc011mao.2	PIP5KL1	protein_coding	127920879	127930797	57.03
ENSG00000196455	1291	-0.568079	0.273334	10.0688	0.0065101	0.280234	ENST00000356763	PIK3R4	3	30849	uc003enj.3	PIK3R4	protein_coding	130678935	130746829	36.67
ENSG00000114391	11857.8	-0.289859	0.0931941	10.0528	0.00656248	0.280234	ENST00000464595	RPL24	3	6152		RPL24	protein_coding	101681091	101686782	42.52
ENSG00000007168	5716.74	0.112416	0.134266	10.0491	0.00657468	0.280234	ENST00000576586	PAFAH1B1	17	5048		PAFAH1B1	protein_coding	2593210	2685615	42.4
ENSG00000125245	1684.57	-0.270269	0.301432	10.0439	0.0065916	0.280234	ENST00000340807	GPR18	13	2841	uc010afv.3	GPR18	protein_coding	99254714	99261744	37.42
ENSG00000006555	324.647	-0.191001	0.679093	10.0367	0.0066155	NA	ENST00000371276	TTC22	1	55001	uc009vzt.1	TTC22	protein_coding	54779712	54801267	52.26
ENSG00000064655	35.0828	5.9027	2.26463	10.0356	0.00661914	NA	ENST00000327619	EYA2	20	2139	uc002xsm.3	EYA2	protein_coding	46894624	47188844	45.44
ENSG00000270503	22.5828	-5.93026	1.73822	10.0311	0.00663391	NA	ENST00000604759		14	NA		RP11-407N17.6	processed_pseudogene	39215065	39216335	48.54
ENSG00000124795	5876.06	0.0230244	0.130353	10.0303	0.00663649	0.280234	ENST00000397239	DEK	6	7913	uc003ncr.1	DEK	protein_coding	18223868	18264823	39.43
ENSG00000176732	31.9088	1.65643	2.90799	10.0177	0.00667851	NA	ENST00000313213	PFN4	2	375189	uc002rfa.1	PFN4	protein_coding	24115371	24123477	44.06
ENSG00000072858	3163.58	0.0771973	0.229466	10.017	0.00668079	0.280234	ENST00000264852	SIDT1	3	54847	uc003eak.3	SIDT1	protein_coding	113532296	113629578	40.79
ENSG00000141867	7836.78	0.100248	0.122769	10.0123	0.00669662	0.280234	ENST00000263377	BRD4	19	23476	uc002nar.3	BRD4	protein_coding	15235519	15332545	50.24
ENSG00000250848	16.1854	7.60644	2.14533	9.98325	0.00679461	NA	ENST00000504656		5	NA		CTD-2083E4.5	processed_pseudogene	288833	290321	39.62
ENSG00000244617	61.1512	8.37461	2.32334	9.93968	0.00694425	NA	ENST00000320256	ASPRV1	2	151516	uc002sfz.5	ASPRV1	protein_coding	69960089	69962265	55.49
ENSG00000236104	1943.56	-0.430941	0.185792	9.92367	0.00700005	0.28974	ENST00000431845	ZBTB22	6	9278	uc003oeb.3	ZBTB22	protein_coding	33314406	33317942	59.46
ENSG00000211653	3176.26	-0.321208	0.31371	9.92027	0.00701198	0.28974	ENST00000390299	IGLV1-40	22	NA		IGLV1-40	IG_V_gene	22409766	22410282	58.8
ENSG00000159352	4169.93	-0.300679	0.138796	9.86758	0.00719915	0.295615	ENST00000368884	PSMD4	1	5710	uc001exl.3	PSMD4	protein_coding	151254703	151267479	47.67
ENSG00000148672	3737.69	-0.249227	0.173734	9.83754	0.00730812	0.298226	ENST00000277865	GLUD1	10	2746	uc001keh.3	GLUD1	protein_coding	87050486	87094866	42.11
ENSG00000172932	5114.57	-0.344812	0.168146	9.81454	0.00739263	0.299812	ENST00000447274	ANKRD13D	11	338692	uc001oke.2	ANKRD13D	protein_coding	67288547	67302485	53.51
ENSG00000259137	18.7171	1.96478	1.09197	9.78395	0.00750657	NA	ENST00000555080		14	NA		RP11-305B6.1	processed_pseudogene	44120210	44120761	41.49
ENSG00000280353	33.5932	7.76467	2.448	9.7657	0.00757541	NA	ENST00000623064		19	NA		CTC-453G23.7	TEC	48198107	48199720	48.08
ENSG00000138073	2171.37	-0.357236	0.251914	9.75173	0.00762851	0.30748	ENST00000468045	PREB	2	10113		PREB	protein_coding	27130756	27134675	57.47
ENSG00000207833	17.3239	-0.308753	1.17247	9.7407	0.00767068	NA	ENST00000385098		22	NA		AC244157.1	miRNA	22792488	22792582	65.26
ENSG00000214198	39.5487	1.58099	1.59048	9.71135	0.00778409	NA	ENST00000548527		12	NA		RP11-642P15.1	unitary_pseudogene	103843749	103930211	42.57
ENSG00000071051	4523.75	-0.198105	0.287676	9.70761	0.00779863	0.311271	ENST00000233154	NCK2	2	8440	uc002tdg.3	NCK2	protein_coding	105744897	105894274	44.54
ENSG00000105856	2384.7	0.420875	0.174924	9.70283	0.00781732	0.311271	ENST00000468410	HBP1	7	26959	uc011klv.2	HBP1	protein_coding	107168961	107202529	37.95
ENSG00000112212	10.1633	-0.542032	2.77483	9.68515	0.00788672	NA	ENST00000373161	TSPO2	6	222642	uc003opj.3	TSPO2	protein_coding	41042554	41044337	56.22
ENSG00000232788	39.4402	0.957046	1.65666	9.67407	0.00793052	NA	ENST00000458314		2	NA		AC078883.3	antisense	172464262	172466022	42.19
ENSG00000158865	57.6992	5.79698	1.74867	9.67226	0.00793771	NA	ENST00000347898	SLC5A11	16	115584	uc002dmu.4	SLC5A11	protein_coding	24845841	24911628	45.54
ENSG00000163683	8963.57	0.160376	0.121628	9.63412	0.00809053	0.320209	ENST00000295958	SMIM14	4	201895	uc003guo.3	SMIM14	protein_coding	39546330	39639090	41.46
ENSG00000211625	264.05	-0.35387	0.780978	9.57967	0.00831381	NA	ENST00000390270	IGKV3D-20	2	NA		IGKV3D-20	IG_V_gene	90038848	90039479	52.06
ENSG00000185986	674.386	0.879858	0.29149	9.48025	0.00873757	NA	ENST00000515467	SDHAP3	5	NA	uc011cme.2	SDHAP3	transcribed_unprocessed_pseudogene	1572222	1594620	47.9
ENSG00000235354	6.92316	1.80868	1.12415	9.466	0.00880005	NA	ENST00000452798		7	NA		CTA-276O3.4	processed_pseudogene	103348601	103348771	50.29
ENSG00000197943	18073.3	-0.0434268	0.0963051	9.46295	0.00881347	0.346419	ENST00000565054	PLCG2	16	5336		PLCG2	protein_coding	81739097	81962693	46.99
ENSG00000211945	2799.3	-0.597491	0.301221	9.45282	0.0088582	0.346419	ENST00000390605	IGHV1-18	14	NA		IGHV1-18	IG_V_gene	106184901	106185394	56.48
ENSG00000198156	48.8447	3.5698	1.76043	9.42106	0.009	NA	ENST00000533640	NPIPB6	16	728741	uc010vcq.3	NPIPB6	protein_coding	28342555	28363508	46.08
ENSG00000055957	13.3597	7.68132	2.48152	9.40939	0.00905266	NA	ENST00000273283	ITIH1	3	3697	uc003dfs.3	ITIH1	protein_coding	52777592	52792068	54.92
ENSG00000051180	33.57	-8.52715	2.09725	9.40218	0.00908538	NA	ENST00000527860	RAD51	15	5888	uc010bbw.3	RAD51	protein_coding	40694774	40732339	43.47
ENSG00000165185	352.314	-0.311662	0.876096	9.39605	0.00911328	NA	ENST00000337530	KIAA1958	9	158405	uc004bgf.2	KIAA1958	protein_coding	112486847	112669397	38.95
ENSG00000142252	1243.4	-0.0938039	0.311326	9.37674	0.00920167	0.35696	ENST00000591607	GEMIN7	19	79760	uc002pap.1	GEMIN7	protein_coding	45079195	45091524	50.45
ENSG00000136156	9213.61	-0.33272	0.146443	9.35949	0.00928139	0.35696	ENST00000378565	ITM2B	13	9445	uc001vbz.3	ITM2B	protein_coding	48233158	48270357	37.31
ENSG00000000938	9845.66	-0.0397967	0.177766	9.35748	0.00929073	0.35696	ENST00000374005	FGR	1	2268	uc001bom.3	FGR	protein_coding	27612064	27635277	52.97
ENSG00000047644	6366.52	-0.0027227	0.131971	9.34127	0.00936634	0.357434	ENST00000380861	WWC3	X	55841	uc004csx.4	WWC3	protein_coding	10015562	10144478	46.21
ENSG00000083857	24.4674	5.65126	1.80369	9.33228	0.00940853	NA	ENST00000441802	FAT1	4	2195	uc003izf.3	FAT1	protein_coding	186587783	186726722	41.53
ENSG00000110042	3530.6	0.182106	0.220993	9.33156	0.00941189	0.357434	ENST00000532982	DTX4	11	23220	uc001nnr.2	DTX4	protein_coding	59171430	59208587	47.6
ENSG00000215347	16.848	8.27609	2.88796	9.32758	0.00943065	NA	ENST00000450250	SLC25A5P1	22	NA		SLC25A5P1	processed_pseudogene	42001069	42001966	50.11
ENSG00000167604	2112.22	-0.215769	0.213477	9.31006	0.00951363	0.358272	ENST00000590828	NFKBID	19	84807		NFKBID	protein_coding	35887653	35902303	53.38
ENSG00000232134	15.236	1.86821	0.777603	9.30706	0.00952793	NA	ENST00000419498	RPS15AP12	1	NA		RPS15AP12	processed_pseudogene	220143964	220144351	44.85
ENSG00000266714	17188.3	0.00530024	0.205799	9.30389	0.00954302	0.358272	ENST00000584516	MYO15B	17	80022	uc002joo.1	MYO15B	transcribed_unprocessed_pseudogene	75588058	75626849	58.72
ENSG00000275106	90.6145	-1.12996	1.84258	9.29808	0.00957078	NA	ENST00000613068		7	NA		RP11-309L24.10	lincRNA	128952527	128953316	40.38
ENSG00000196954	4293.36	0.0874039	0.137883	9.27946	0.0096603	0.360614	ENST00000525116	CASP4	11	837		CASP4	protein_coding	104942866	104969436	37.69
ENSG00000091972	3476.06	-0.266603	0.284127	9.26324	0.00973896	0.361497	ENST00000607597	CD200	3	4345		CD200	protein_coding	112332347	112362812	38.61
ENSG00000250492	35.6157	2.04917	1.5841	9.22965	0.00990389	NA	ENST00000504674	INTS6P1	5	NA		INTS6P1	processed_pseudogene	39718984	39721513	41.3
ENSG00000167306	134.933	3.7946	1.79938	9.2269	0.00991757	NA	ENST00000285039	MYO5B	18	4645	uc002leb.2	MYO5B	protein_coding	49822813	50195093	44.5
ENSG00000136068	4210.93	0.222103	0.241023	9.22603	0.00992184	0.366216	ENST00000490882	FLNB	3	2317	uc010hne.2	FLNB	protein_coding	58008400	58172251	46.61
ENSG00000239388	448.881	-0.0812983	0.797916	9.20076	0.010048	NA	ENST00000487349	ASB14	3	142686	uc032roo.1	ASB14	protein_coding	57268347	57292682	38.4
ENSG00000270987	76.1858	-0.101776	1.78657	9.19655	0.0100692	NA	ENST00000604292		6	NA		RP3-467N11.2	processed_pseudogene	100889603	100890338	55.3
ENSG00000006831	1945.03	0.365956	0.180391	9.18756	0.0101146	0.371244	ENST00000537545	ADIPOR2	12	79602		ADIPOR2	protein_coding	1688574	1788678	39.4
ENSG00000079308	3.70418	4.78609	1.79141	9.18193	0.0101431	NA	ENST00000171887	TNS1	2	7145	uc002vgt.2	TNS1	protein_coding	217799789	218002995	52.38
ENSG00000242580	75.6507	-0.0968336	1.78898	9.16206	0.0102443	NA	ENST00000468879	IGKV1D-43	2	NA		IGKV1D-43	IG_V_gene	90209873	90210529	51.45
ENSG00000156467	4741.57	-0.317764	0.16059	9.13853	0.0103656	0.374841	ENST00000287022	UQCRB	8	7381	uc003yhq.4	UQCRB	protein_coding	96225920	96235634	38.18
ENSG00000114520	1064.42	-0.325615	0.349612	9.13568	0.0103803	0.374841	ENST00000251775	SNX4	3	8723	uc003eib.4	SNX4	protein_coding	125446644	125520197	40.09
ENSG00000135776	1320.24	-0.490765	0.300948	9.12194	0.0104519	0.374841	ENST00000344517	ABCB10	1	23456	uc001htp.4	ABCB10	protein_coding	229516582	229558695	43.62
ENSG00000109971	19772.4	-0.155787	0.142625	9.1184	0.0104704	0.374841	ENST00000532636	HSPA8	11	3312	uc001pyo.4	HSPA8	protein_coding	123057489	123063230	49.25
ENSG00000184897	5885.08	-0.0183662	0.232746	9.10557	0.0105378	0.374841	ENST00000333762	H1FX	3	8971	uc003elx.3	H1FX	protein_coding	129314771	129316277	68.61
ENSG00000130309	6843.22	0.406274	0.139105	9.10233	0.0105549	0.374841	ENST00000252599	COLGALT1	19	79709	uc002nhc.1	COLGALT1	protein_coding	17555594	17583162	52.86
ENSG00000139726	3122.67	0.0613513	0.232061	9.08368	0.0106538	0.375305	ENST00000280557	DENR	12	8562	uc001uda.3	DENR	protein_coding	122752774	122771064	42.12
ENSG00000158435	1674.6	-0.138136	0.252302	9.06421	0.010758	0.375305	ENST00000289382	CNOT11	2	55571	uc002taw.4	CNOT11	protein_coding	101252802	101270316	43.29
ENSG00000224861	3214.87	0.143399	0.174663	9.05111	0.0108287	0.375305	ENST00000445822	YBX1P1	14	NA		YBX1P1	processed_pseudogene	66012830	66013789	56.04
ENSG00000005844	7001.16	-0.234919	0.137806	9.04998	0.0108348	0.375305	ENST00000356798	ITGAL	16	3683	uc002dyi.4	ITGAL	protein_coding	30472658	30523185	50.46
ENSG00000156671	2449.68	-0.0474898	0.218726	9.04652	0.0108536	0.375305	ENST00000447533	SAMD8	10	142891	uc001jwy.2	SAMD8	protein_coding	75099586	75182123	43.24
ENSG00000185591	6091.03	-0.34074	0.125679	9.02049	0.0109957	0.377699	ENST00000551969	SP1	12	6667		SP1	protein_coding	53380176	53416446	45.65
ENSG00000115020	9657.08	0.179628	0.148122	9.01286	0.0110378	0.377699	ENST00000392202	PIKFYVE	2	200576	uc002vcv.3	PIKFYVE	protein_coding	208266267	208358751	37.08
ENSG00000259479	11.9293	-4.76691	1.61967	8.94896	0.0113961	NA	ENST00000562107	SORD2P	15	NA		SORD2P	transcribed_unprocessed_pseudogene	44826371	44884694	44.78
ENSG00000204217	1425.33	-0.264005	0.322203	8.94696	0.0114075	0.387621	ENST00000374580	BMPR2	2	659	uc002uzf.4	BMPR2	protein_coding	202376936	202567751	41.04
ENSG00000143149	2541.8	0.32675	0.317689	8.94028	0.0114457	0.387621	ENST00000354775	ALDH9A1	1	223	uc001gdh.1	ALDH9A1	protein_coding	165662216	165698863	40.34
ENSG00000177383	1648.38	-0.626607	0.318086	8.92912	0.0115098	0.387791	ENST00000317897	MAGEF1	3	64110	uc003fpa.3	MAGEF1	protein_coding	184710367	184712002	52.87
ENSG00000143878	3190.51	0.233513	0.23629	8.89241	0.011723	0.392958	ENST00000272233	RHOB	2	388	uc002rdv.3	RHOB	protein_coding	20447074	20449445	57.34
ENSG00000223984	18.8513	2.24314	1.41616	8.87388	0.0118321	NA	ENST00000453465	HNRNPRP1	10	NA		HNRNPRP1	processed_pseudogene	21624592	21626286	45.6
ENSG00000188649	13.5133	7.94973	2.73651	8.87351	0.0118343	NA	ENST00000424464	CC2D2B	10	387707		CC2D2B	protein_coding	96000091	96032684	38.34
ENSG00000134324	2352	-0.466342	0.241054	8.86678	0.0118741	0.394239	ENST00000449576	LPIN1	2	23175	uc010yjm.3	LPIN1	protein_coding	11677595	11827409	46.76
ENSG00000009307	19633.4	-0.0527529	0.0928416	8.8656	0.0118812	0.394239	ENST00000339438	CSDE1	1	7812	uc001efl.3	CSDE1	protein_coding	114716913	114758676	38.28
ENSG00000129128	5540.53	-0.065208	0.151081	8.84519	0.012003	0.396281	ENST00000503362	SPCS3	4	60559	uc003iur.4	SPCS3	protein_coding	176319964	176332245	36.77
ENSG00000230330	1877.04	-0.236749	0.250929	8.83464	0.0120665	0.396386	ENST00000433603	HMGN2P3	16	NA		HMGN2P3	processed_pseudogene	26032539	26032811	51.28
ENSG00000140264	8416.14	-0.0167122	0.111805	8.82305	0.0121366	0.396705	ENST00000474290	SERF2	15	10169		SERF2	protein_coding	43777087	43802589	49.15
ENSG00000134107	843.944	-0.485157	0.387016	8.81905	0.012161	NA	ENST00000256495	BHLHE40	3	8553	uc003bqf.3	BHLHE40	protein_coding	4979116	4985323	48.92
ENSG00000136875	1466.49	-0.35042	0.240389	8.80215	0.0122642	0.398889	ENST00000374199	PRPF4	9	9128	uc004bgx.3	PRPF4	protein_coding	113275343	113292905	42.73
ENSG00000091592	17055.2	-0.088284	0.0943681	8.79176	0.012328	0.398991	ENST00000544378	NLRP1	17	22861	uc002gcg.1	NLRP1	protein_coding	5499427	5619424	46.74
ENSG00000173442	9773.76	0.00242039	0.149026	8.7761	0.012425	0.399581	ENST00000309295	EHBP1L1	11	254102	uc001oeo.4	EHBP1L1	protein_coding	65576038	65592650	60.62
ENSG00000235587	14.6011	4.0721	1.44944	8.77142	0.012454	NA	ENST00000425487	GAPDHP65	X	NA		GAPDHP65	processed_pseudogene	46439709	46440714	53.68
ENSG00000170634	420.887	-0.462181	0.491857	8.77046	0.01246	NA	ENST00000606082	ACYP2	2	98		ACYP2	protein_coding	53970838	54305300	40.31
ENSG00000213930	1561.1	-0.381714	0.287601	8.7676	0.0124778	0.399581	ENST00000605275	GALT	9	2592		GALT	protein_coding	34638133	34651035	50.16
ENSG00000143776	16.2207	-6.25115	1.99539	8.75821	0.0125366	NA	ENST00000366767	CDC42BPA	1	8476	uc001hqs.3	CDC42BPA	protein_coding	226989865	227318474	36.66
ENSG00000112685	2083.35	-0.437419	0.276203	8.75257	0.012572	0.399581	ENST00000230449	EXOC2	6	55770	uc003mtd.4	EXOC2	protein_coding	485133	693111	40.51
ENSG00000183955	1091.98	-0.601239	0.301523	8.74605	0.012613	0.399581	ENST00000402868	SETD8	12	387893	uc001uew.3	SETD8	protein_coding	123383773	123409358	51.73
ENSG00000236452	39.8296	-8.6714	2.53253	8.74431	0.012624	NA	ENST00000455974		3	NA		AC123023.1	lincRNA	34203244	34268811	40.05
ENSG00000163346	9608.89	-0.236795	0.120371	8.74014	0.0126503	0.399581	ENST00000368465	PBXIP1	1	57326	uc001ffs.3	PBXIP1	protein_coding	154944076	154956123	54.24
ENSG00000277443	2806.33	-0.0108602	0.306528	8.72226	0.0127639	0.400324	ENST00000612661	MARCKS	6	4082	uc032xir.1	MARCKS	protein_coding	113857362	113863471	48.49
ENSG00000070081	424.163	-0.669773	0.794239	8.72147	0.012769	NA	ENST00000528644	NUCB2	11	4925		NUCB2	protein_coding	17208153	17349974	41.44
ENSG00000037474	4404.6	-0.0201388	0.131514	8.71728	0.0127958	0.400324	ENST00000264670	NSUN2	5	54888	uc003jdu.3	NSUN2	protein_coding	6599239	6633291	43.29
ENSG00000151067	6.50597	-3.70796	1.52389	8.6896	0.0129741	NA	ENST00000543114	CACNA1C	12	775		CACNA1C	protein_coding	1970786	2697950	47.13
ENSG00000140398	3801.1	0.426295	0.238374	8.68611	0.0129967	0.404685	ENST00000564500	NEIL1	15	79661		NEIL1	protein_coding	75346955	75357114	58.79
ENSG00000124226	3649.8	0.0469674	0.171661	8.65336	0.0132113	0.409426	ENST00000623528	RNF114	20	55905	uc002xux.3	RNF114	protein_coding	49936336	49953892	46.63
ENSG00000100968	260.765	0.290642	1.08083	8.6273	0.0133846	NA	ENST00000440487	NFATC4	14	4776		NFATC4	protein_coding	24365673	24379604	56.84
ENSG00000124508	4540.17	-0.253612	0.273698	8.62618	0.0133921	0.412235	ENST00000469230	BTN2A2	6	10385	uc003nhs.3	BTN2A2	protein_coding	26383096	26394874	45.78
ENSG00000204316	789.871	-0.796696	0.293352	8.62498	0.0134002	NA	ENST00000309352	MRPL38	17	64978	uc010wso.1	MRPL38	protein_coding	75898643	75905413	57.66
ENSG00000085662	2154.09	-0.0749946	0.248686	8.62091	0.0134274	0.412235	ENST00000285930	AKR1B1	7	231	uc003vrp.1	AKR1B1	protein_coding	134442350	134459284	50.04
ENSG00000205336	5.94808	5.47288	1.96565	8.61259	0.0134834	NA	ENST00000565587	GPR56	16	9289		GPR56	protein_coding	57610652	57665580	55.51
ENSG00000178971	11029.7	0.34346	0.161818	8.60308	0.0135477	0.412289	ENST00000315684	CTC1	17	80169	uc002gkq.4	CTC1	protein_coding	8224821	8248044	48.84
ENSG00000143811	2561.05	0.0265095	0.208712	8.59629	0.0135937	0.412289	ENST00000343818	PYCR2	1	29920	uc001hpq.4	PYCR2	protein_coding	225919877	225924340	54.97
ENSG00000152492	10750.7	-0.0163707	0.153655	8.59281	0.0136175	0.412289	ENST00000392455	CCDC50	3	152137	uc003fsw.3	CCDC50	protein_coding	191329077	191398670	36.59
ENSG00000071909	47.8076	-8.06382	1.99173	8.58561	0.0136665	NA	ENST00000409940	MYO3B	2	140469	uc010fqb.2	MYO3B	protein_coding	170178145	170655171	40.21
ENSG00000167618	26.0524	-4.12791	1.86177	8.57307	0.0137525	NA	ENST00000412608	LAIR2	19	3904		LAIR2	protein_coding	54497879	54510687	49.25
ENSG00000111144	10674.6	-0.110544	0.14447	8.55626	0.0138686	0.416974	ENST00000228740	LTA4H	12	4048	uc001ten.2	LTA4H	protein_coding	96000828	96043520	39.1
ENSG00000111837	18.2425	-5.16745	1.92631	8.55342	0.0138883	NA	ENST00000313243	MAK	6	4117	uc003mzm.3	MAK	protein_coding	10762723	10838555	42.11
ENSG00000143971	1008	-0.913519	0.309254	8.54136	0.0139723	0.416974	ENST00000272342	ETAA1	2	54465	uc002sdz.1	ETAA1	protein_coding	67397319	67410545	33.26
ENSG00000159708	20.423	15.111	3.01171	8.53997	0.013982	NA	ENST00000563303	LRRC36	16	55282		LRRC36	protein_coding	67326798	67385203	41.33
ENSG00000108219	2503.24	0.222223	0.182601	8.52787	0.0140668	0.416974	ENST00000429989	TSPAN14	10	81619	uc001kcj.4	TSPAN14	protein_coding	80454166	80533123	49.31
ENSG00000073464	2257.75	0.495679	0.24719	8.52511	0.0140863	0.416974	ENST00000380833	CLCN4	X	1183	uc004csy.4	CLCN4	protein_coding	10156945	10237660	45.24
ENSG00000140740	4387.65	-0.22138	0.172991	8.52464	0.0140895	0.416974	ENST00000268379	UQCRC2	16	7385	uc002djx.3	UQCRC2	protein_coding	21952660	21983660	40.33
ENSG00000131584	4808.32	0.0382666	0.14192	8.51276	0.0141735	0.417029	ENST00000354700	ACAP3	1	116983	uc001aeb.2	ACAP3	protein_coding	1292376	1309609	67.3
ENSG00000173209	10944.4	-0.0322037	0.0985409	8.50644	0.0142183	0.417029	ENST00000357022	AHSA2	2	130872	uc002sbc.2	AHSA2	protein_coding	61177418	61191203	44.61
ENSG00000213983	8781.58	-0.198717	0.12079	8.47748	0.0144257	0.420965	ENST00000308724	AP1G2	14	8906	uc001wkl.3	AP1G2	protein_coding	23559565	23568070	55.18
ENSG00000172508	3007.58	0.11209	0.282674	8.46988	0.0144807	0.420965	ENST00000525907	CARNS1	11	57571		CARNS1	protein_coding	67414968	67425607	62.67
ENSG00000101222	8.7667	6.591	2.51863	8.45709	0.0145736	NA	ENST00000471499	SPEF1	20	25876		SPEF1	protein_coding	3777504	3781448	57.54
ENSG00000163219	8378.38	-0.0616201	0.1272	8.45453	0.0145923	0.42234	ENST00000463483	ARHGAP25	2	9938	uc010yqk.2	ARHGAP25	protein_coding	68679601	68826833	41.83
ENSG00000143322	1296.14	-0.0461486	0.306031	8.43287	0.0147511	0.424302	ENST00000502732	ABL2	1	27	uc001gmj.4	ABL2	protein_coding	179099327	179229684	41.31
ENSG00000164331	1537.75	-0.786658	0.26747	8.42769	0.0147894	0.424302	ENST00000296785	ANKRA2	5	57763	uc003kcu.2	ANKRA2	protein_coding	73552335	73565686	37.28
ENSG00000259856	89.4401	0.0498969	1.58893	8.42638	0.0147991	NA	ENST00000561790	RAB43P1	16	NA		RAB43P1	processed_pseudogene	46626404	46626992	61.29
ENSG00000089327	6984.4	-0.321362	0.188526	8.41513	0.0148826	0.424302	ENST00000392218	FXYD5	19	53827		FXYD5	protein_coding	35154730	35169883	49.87
ENSG00000140391	7797.24	0.237901	0.196455	8.41032	0.0149184	0.424302	ENST00000267970	TSPAN3	15	10099	uc002bcj.3	TSPAN3	protein_coding	77041404	77083984	41.92
ENSG00000171862	7257.01	0.102867	0.12805	8.38355	0.0151194	0.427533	ENST00000371953	PTEN	10	5728	uc001kfb.3	PTEN	protein_coding	87863113	87971930	35.77
ENSG00000151117	16.4678	-7.35512	2.56136	8.37984	0.0151475	NA	ENST00000527002	TMEM86A	11	144110		TMEM86A	protein_coding	18693122	18704785	51.95
ENSG00000167302	4010.1	-0.477199	0.191772	8.37791	0.0151621	0.427533	ENST00000573295	ENTHD2	17	146705	uc002jzv.2	ENTHD2	protein_coding	81228277	81239091	62.93
ENSG00000179262	3504.18	-0.0932404	0.157082	8.33462	0.0154939	0.43502	ENST00000591499	RAD23A	19	5886	uc002mvw.2	RAD23A	protein_coding	12945855	12953642	54.44
ENSG00000139318	624.838	-0.0356021	0.785049	8.33376	0.0155005	NA	ENST00000279488	DUSP6	12	1848	uc001tay.4	DUSP6	protein_coding	89347232	89353271	46.57
ENSG00000269506	51.2968	-2.15646	3.4129	8.31984	0.0156088	NA	ENST00000595906		4	NA		RP11-571I18.5	antisense	54059597	54061210	31.78
ENSG00000233503	13.9258	-3.23831	1.74427	8.30999	0.0156859	NA	ENST00000421896	HNRNPLP1	6	NA		HNRNPLP1	processed_pseudogene	7481094	7482594	54.1
ENSG00000227034	10.5001	2.81225	1.80794	8.30476	0.0157269	NA	ENST00000457507		1	NA		RP11-234N17.1	processed_pseudogene	99008218	99008474	43.97
ENSG00000154978	4828.77	-0.231121	0.222528	8.29432	0.0158092	0.44147	ENST00000462326	VOPP1	7	81552		VOPP1	protein_coding	55436056	55572988	46.42
ENSG00000228050	37.0375	2.74897	1.52404	8.27739	0.0159437	NA	ENST00000420768	TOP3BP1	22	NA		TOP3BP1	processed_pseudogene	22223187	22224566	63.19
ENSG00000242076	765.96	-0.634501	0.402762	8.26986	0.0160038	NA	ENST00000473726	IGKV1-33	2	NA		IGKV1-33	IG_V_gene	89266494	89268506	42.72
ENSG00000087087	7561.02	-0.239815	0.131623	8.26265	0.0160616	0.44147	ENST00000620394	SRRT	7	51593		SRRT	protein_coding	100875111	100888664	53.17
ENSG00000100365	3946.72	-0.260703	0.187049	8.24631	0.0161934	0.44147	ENST00000447071	NCF4	22	4689	uc003apz.4	NCF4	protein_coding	36860988	36878015	53.4
ENSG00000151748	3674.52	-0.0066789	0.147114	8.23154	0.0163134	0.44147	ENST00000555720	SAV1	14	60485	uc001wyh.2	SAV1	protein_coding	50632058	50668331	37.89
ENSG00000069966	3975.31	0.468848	0.18621	8.23052	0.0163217	0.44147	ENST00000261837	GNB5	15	10681	uc002abt.1	GNB5	protein_coding	52115105	52191369	45.39
ENSG00000159314	10256.9	-0.221634	0.158741	8.22615	0.0163574	0.44147	ENST00000532038	ARHGAP27	17	201176	uc032fka.1	ARHGAP27	protein_coding	45393902	45434421	54.68
ENSG00000090861	2331.48	-0.615084	0.268181	8.20964	0.016493	0.44147	ENST00000261772	AARS	16	16	uc002eyn.1	AARS	protein_coding	70252295	70289543	49.47
ENSG00000090238	5934.55	0.123479	0.163883	8.2081	0.0165057	0.44147	ENST00000570099	YPEL3	16	83719		YPEL3	protein_coding	30092314	30096915	58.41
ENSG00000167658	131030	-0.157239	0.0705825	8.20688	0.0165157	0.44147	ENST00000600794	EEF2	19	1938		EEF2	protein_coding	3976056	3985469	59.53
ENSG00000180787	1398.48	0.18104	0.284341	8.1925	0.0166349	0.44147	ENST00000318833	ZFP3	17	124961	uc002gaq.3	ZFP3	protein_coding	5078248	5096374	45.78
ENSG00000101997	2075.73	-0.610276	0.266128	8.18774	0.0166746	0.44147	ENST00000376227	CCDC22	X	28952	uc004dnd.2	CCDC22	protein_coding	49235467	49250526	53.55
ENSG00000004799	236.272	-1.25315	1.43392	8.18571	0.0166915	NA	ENST00000005178	PDK4	7	5166	uc003uoa.3	PDK4	protein_coding	95583499	95596491	36.07
ENSG00000222038	22.1715	-0.416712	1.40636	8.17899	0.0167477	NA	ENST00000409602	POTEJ	2	653781	uc021vor.2	POTEJ	protein_coding	130611481	130658091	37.56
ENSG00000140553	3060.81	-0.166218	0.207085	8.17818	0.0167545	0.44147	ENST00000480470	UNC45A	15	55898		UNC45A	protein_coding	90930180	90954093	53.82
ENSG00000130775	1768.19	0.130168	0.407721	8.17771	0.0167584	0.44147	ENST00000373925	THEMIS2	1	9473	uc001boz.4	THEMIS2	protein_coding	27872543	27886685	54.04
ENSG00000139193	1219.2	-0.911733	0.397696	8.17741	0.0167609	0.44147	ENST00000266557	CD27	12	939	uc001qod.3	CD27	protein_coding	6444867	6451718	51.46
ENSG00000137309	2605.25	0.0784023	0.147296	8.17665	0.0167673	0.44147	ENST00000347617	HMGA1	6	3159	uc003oiy.3	HMGA1	protein_coding	34236873	34246231	57.83
ENSG00000104299	1188.11	0.0618886	0.315074	8.17291	0.0167987	0.44147	ENST00000523303	INTS9	8	55756	uc003xha.3	INTS9	protein_coding	28767661	28890242	42.01
ENSG00000160856	18347.1	-0.339558	0.203287	8.15586	0.0169425	0.443112	ENST00000457799	FCRL3	1	115352		FCRL3	protein_coding	157674321	157700857	40.64
ENSG00000150990	2111.75	-0.121831	0.21935	8.14955	0.0169961	0.443112	ENST00000542400	DHX37	12	57647		DHX37	protein_coding	124946825	124989122	54.02
ENSG00000136149	674.675	-0.282911	0.278751	8.14684	0.0170191	NA	ENST00000484130	RPL13AP25	13	NA		RPL13AP25	processed_pseudogene	54440704	54441315	57.19
ENSG00000171812	22.56	7.30809	2.16325	8.14122	0.017067	NA	ENST00000303143	COL8A2	1	1296	uc001bzv.3	COL8A2	protein_coding	36095236	36125220	55.63
ENSG00000104517	7373.83	0.0165586	0.145515	8.13865	0.0170889	0.443718	ENST00000520539	UBR5	8	51366	uc003ykr.2	UBR5	protein_coding	102253012	102412841	38.38
ENSG00000108256	6194.89	-0.0790927	0.158436	8.131	0.0171544	0.443718	ENST00000225388	NUFIP2	17	57532	uc002hdy.4	NUFIP2	protein_coding	29255836	29294118	41.64
ENSG00000221978	10665.5	-0.0454318	0.126673	8.12221	0.01723	0.443926	ENST00000480479	CCNL2	1	81669	uc010nym.1	CCNL2	protein_coding	1385711	1399328	51.37
ENSG00000261812	10.3955	-6.32467	2.38395	8.11536	0.0172891	NA	ENST00000564451	TUBB8P7	16	NA		TUBB8P7	polymorphic_pseudogene	90093154	90096354	56.61
ENSG00000279330	56.2304	1.45425	1.80341	8.09524	0.0174639	NA	ENST00000622989		16	NA		AJ003147.11	TEC	3273609	3275807	44.79
ENSG00000181143	24.4399	-3.31108	1.16891	8.09207	0.0174916	NA	ENST00000397910	MUC16	19	94025	uc002mkp.3	MUC16	protein_coding	8848844	8981342	45.91
ENSG00000178295	2616.19	-0.136286	0.274346	8.07601	0.0176326	0.452359	ENST00000317402	GEN1	2	348654	uc002rct.2	GEN1	protein_coding	17753858	17788941	35.87
ENSG00000197536	1072.54	-0.128235	0.346694	8.06894	0.017695	0.452359	ENST00000378953	C5orf56	5	NA	uc003kwz.2	C5orf56	protein_coding	132410636	132476044	46.92
ENSG00000161904	3130.72	-0.287812	0.203618	8.05665	0.0178042	0.453385	ENST00000506578	LEMD2	6	221496	uc010jvg.3	LEMD2	protein_coding	33771202	33789136	53.18
ENSG00000094916	4055.92	0.3821	0.173803	8.03452	0.0180022	0.455887	ENST00000209875	CBX5	12	23468	uc001sfk.5	CBX5	protein_coding	54230940	54280133	42.96
ENSG00000140262	3245.31	-0.244831	0.212504	8.0302	0.0180412	0.455887	ENST00000438423	TCF12	15	6938	uc002aeb.3	TCF12	protein_coding	56918623	57299281	37.17
ENSG00000122034	6858.23	0.223005	0.126015	8.02251	0.0181107	0.455889	ENST00000381140	GTF3A	13	2971	uc001ure.3	GTF3A	protein_coding	27424544	27435823	44.92
ENSG00000107863	926.404	0.0175457	0.578605	8.01566	0.0181728	NA	ENST00000396432	ARHGAP21	10	57584	uc001isb.2	ARHGAP21	protein_coding	24583609	24723668	38.96
ENSG00000166147	11.6958	2.52325	1.27106	8.01262	0.0182004	NA	ENST00000316623	FBN1	15	2200	uc001zwx.2	FBN1	protein_coding	48408306	48645849	38.92
ENSG00000154803	1905.04	-0.0696262	0.232402	8.00675	0.0182539	0.457742	ENST00000285071	FLCN	17	201163	uc002gra.4	FLCN	protein_coding	17212212	17237188	53.29
ENSG00000188906	3823.46	0.675145	0.243839	7.98759	0.0184296	0.459383	ENST00000416796	LRRK2	12	120892		LRRK2	protein_coding	40196744	40369285	35.24
ENSG00000070182	2.53567	-0.178639	1.62612	7.9864	0.0184406	NA	ENST00000556626	SPTB	14	6710	uc001xhs.3	SPTB	protein_coding	64746283	64879883	48.21
ENSG00000124164	1535.17	0.135425	0.200118	7.98438	0.0184592	0.459383	ENST00000475243	VAPB	20	9217	uc002xza.3	VAPB	protein_coding	58389122	58451101	42.86
ENSG00000116299	15.9649	5.59449	1.81217	7.97688	0.0185286	NA	ENST00000533147	KIAA1324	1	57535		KIAA1324	protein_coding	109113679	109206781	45.89
ENSG00000280832	20.1563	-8.01066	2.80795	7.94864	0.0187921	NA	ENST00000629441	ST3GAL4-AS1	11	NA	uc001qdq.4	ST3GAL4-AS1	antisense	126340889	126355587	50.38
ENSG00000203819	15.1876	-3.54699	1.97955	7.94497	0.0188266	NA	ENST00000498492	HIST2H2BC	1	337873		HIST2H2BC	processed_pseudogene	149850193	149850772	60
ENSG00000124466	7.00549	-0.902367	2.62404	7.91624	0.019099	NA	ENST00000244333	LYPD3	19	27076	uc002owl.1	LYPD3	protein_coding	43460787	43465660	56.96
ENSG00000122728	15.9037	-0.0706714	1.13958	7.91002	0.0191585	NA	ENST00000242310	TAF1L	9	6872	uc003zrg.1	TAF1L	protein_coding	32629454	32635669	46.61
ENSG00000171992	4848.8	-0.0987095	0.221968	7.90813	0.0191766	0.47384	ENST00000394243	SYNPO	5	11346	uc003lsn.3	SYNPO	protein_coding	150601080	150659220	52.53
ENSG00000139644	18406.6	-0.197422	0.0971525	7.89866	0.0192676	0.47384	ENST00000548809	TMBIM6	12	7009		TMBIM6	protein_coding	49707725	49764934	43.42
ENSG00000119408	2293.8	0.0216889	0.508596	7.89352	0.0193172	0.47384	ENST00000373603	NEK6	9	10783	uc004bof.3	NEK6	protein_coding	124257606	124353307	54.99
ENSG00000110987	7151.94	0.199458	0.160834	7.89233	0.0193287	0.47384	ENST00000538010	BCL7A	12	605	uc001ubo.3	BCL7A	protein_coding	122019422	122062044	52.98
ENSG00000271424	78.1562	6.08606	2.27593	7.88473	0.0194023	NA	ENST00000604758		14	NA		RP11-647O20.1	processed_pseudogene	39370279	39370756	54.18
ENSG00000103187	14953.5	0.104658	0.187589	7.8778	0.0194696	0.47384	ENST00000262428	COTL1	16	23406	uc002fid.4	COTL1	protein_coding	84565594	84618077	50.24
ENSG00000138867	15346.6	-0.00859803	0.139224	7.87566	0.0194905	0.47384	ENST00000407471	GUCD1	22	83606	uc003aah.3	GUCD1	protein_coding	24540423	24555935	55.14
ENSG00000125510	355.708	0.276834	0.992437	7.87354	0.0195111	NA	ENST00000336866	OPRL1	20	4987	uc002yic.3	OPRL1	protein_coding	64080173	64100643	60.16
ENSG00000136628	5258.47	-0.0258549	0.169156	7.86375	0.0196069	0.47384	ENST00000366923	EPRS	1	2058	uc001hly.1	EPRS	protein_coding	219968601	220046658	38.15
ENSG00000131379	20.6455	1.54158	1.65392	7.85434	0.0196994	NA	ENST00000253697	C3orf20	3	84077	uc003byy.3	C3orf20	protein_coding	14675099	14773034	44.01
ENSG00000130559	1460.91	-0.485417	0.364396	7.84609	0.0197808	0.47384	ENST00000389532	CAMSAP1	9	157922	uc004cgr.4	CAMSAP1	protein_coding	135808487	135907228	46.91
ENSG00000231329	63.5694	0.271617	1.54644	7.84522	0.0197894	NA	ENST00000589192		6	NA		RP1-225E12.2	antisense	139144204	139239653	40.62
ENSG00000164978	502.531	0.60224	0.51438	7.83904	0.0198506	NA	ENST00000379158	NUDT2	9	318	uc003zub.3	NUDT2	protein_coding	34329506	34343713	46.38
ENSG00000083312	4129.87	-0.354441	0.168695	7.8362	0.0198788	0.47384	ENST00000337273	TNPO1	5	3842	uc003kck.4	TNPO1	protein_coding	72816312	72916733	37.25
ENSG00000150867	4827.33	-0.272049	0.157686	7.83581	0.0198828	0.47384	ENST00000605011	PIP4K2A	10	5305		PIP4K2A	protein_coding	22534849	22714555	41.89
ENSG00000169018	2715.67	-0.153585	0.230342	7.83368	0.0199039	0.47384	ENST00000306917	FEM1B	15	10116	uc002arg.4	FEM1B	protein_coding	68277803	68295865	39.07
ENSG00000131508	4246.46	0.344109	0.165013	7.83351	0.0199056	0.47384	ENST00000511725	UBE2D2	5	7322	uc003ler.3	UBE2D2	protein_coding	139526431	139628433	44.35
ENSG00000164344	81.7298	9.1123	2.5637	7.83257	0.019915	NA	ENST00000511608	KLKB1	4	3818	uc003iyy.3	KLKB1	protein_coding	186208979	186258471	40.19
ENSG00000228509	18.9968	1.45625	3.07586	7.82276	0.0200128	NA	ENST00000421437		2	NA		AC006460.2	antisense	190676944	190708716	37.78
ENSG00000204351	4054.1	-0.087339	0.160022	7.8215	0.0200255	0.474973	ENST00000375394	SKIV2L	6	6499	uc003nyn.1	SKIV2L	protein_coding	31959080	31969755	54.18
ENSG00000213420	317.577	-0.234469	1.0203	7.80749	0.0201663	NA	ENST00000292377	GPC2	7	221914	uc003utv.3	GPC2	protein_coding	100169606	100177372	55.45
ENSG00000102606	4778.95	-0.132996	0.180626	7.79925	0.0202495	0.477101	ENST00000483540	ARHGEF7	13	8874		ARHGEF7	protein_coding	111114559	111305737	44.55
ENSG00000198961	4361.73	-0.144841	0.187101	7.77812	0.0204645	0.477101	ENST00000361189	PJA2	5	9867	uc003kos.4	PJA2	protein_coding	109334709	109409994	37.66
ENSG00000128272	11831.1	-0.38945	0.138298	7.77223	0.020525	0.477101	ENST00000404241	ATF4	22	468	uc003axz.3	ATF4	protein_coding	39519695	39522685	58.94
ENSG00000263846	12.7318	-3.04902	1.48183	7.76978	0.0205501	NA	ENST00000584883	CIAPIN1P	18	NA		CIAPIN1P	processed_pseudogene	26599408	26600338	50.81
ENSG00000143799	15664.1	0.158687	0.0752428	7.76798	0.0205686	0.477101	ENST00000366794	PARP1	1	142	uc001hqd.4	PARP1	protein_coding	226360691	226408079	46.8
ENSG00000148730	4725.65	-0.0261674	0.155768	7.76798	0.0205686	0.477101	ENST00000373218	EIF4EBP2	10	1979	uc001jrb.3	EIF4EBP2	protein_coding	70404379	70428618	43.66
ENSG00000065154	1017.14	-0.309097	0.200671	7.76544	0.0205947	0.477101	ENST00000368845	OAT	10	4942	uc001lhp.3	OAT	protein_coding	124397303	124418976	42.49
ENSG00000127947	2631.2	0.512896	0.269988	7.76149	0.0206355	0.477101	ENST00000248594	PTPN12	7	5782	uc003ugh.2	PTPN12	protein_coding	77537275	77640071	38.16
ENSG00000173821	16711	0.141246	0.160963	7.74834	0.0207715	0.477101	ENST00000508628	RNF213	17	57674	uc021uen.2	RNF213	protein_coding	80260866	80398786	49.93
ENSG00000081059	1118.82	-0.413448	0.407003	7.74247	0.0208326	0.477101	ENST00000342854	TCF7	5	6932	uc003kyt.3	TCF7	protein_coding	134114711	134151865	54.54
ENSG00000159140	25785	-0.0817763	0.0835914	7.7409	0.020849	0.477101	ENST00000356577	SON	21	6651	uc002yse.2	SON	protein_coding	33542618	33577481	38.94
ENSG00000154263	50.0801	-8.44754	2.22483	7.7356	0.0209043	NA	ENST00000522787	ABCA10	17	10349		ABCA10	protein_coding	69147214	69244846	36.13
ENSG00000136573	25163.7	-0.276599	0.111879	7.73382	0.0209229	0.477101	ENST00000259089	BLK	8	640	uc003wty.3	BLK	protein_coding	11494001	11564604	47.41
ENSG00000100225	4488.67	0.134729	0.196851	7.72389	0.021027	0.477101	ENST00000266087	FBXO7	22	25793	uc003amq.3	FBXO7	protein_coding	32474676	32498829	38.81
ENSG00000268056	9.43251	5.9843	2.02474	7.72118	0.0210556	NA	ENST00000597216		19	NA		CTD-3032J10.2	antisense	17152588	17168051	48.95
ENSG00000169255	53.4996	-0.447952	1.90574	7.70615	0.0212144	NA	ENST00000320474	B3GALNT1	3	8706	uc003fdy.3	B3GALNT1	protein_coding	161083883	161105384	40.28
ENSG00000138119	27.3184	3.84591	1.91702	7.70215	0.0212569	NA	ENST00000463743	MYOF	10	26509	uc001kio.3	MYOF	protein_coding	93306429	93482317	44.36
ENSG00000182208	1451.64	-0.0392834	0.264095	7.70214	0.021257	0.477101	ENST00000531976	MOB2	11	81532		MOB2	protein_coding	1469457	1501247	54.17
ENSG00000155066	12.7781	-6.30982	2.23297	7.69725	0.021309	NA	ENST00000403131	PROM2	2	150696	uc002suk.3	PROM2	protein_coding	95274453	95291308	58.88
ENSG00000120451	3367.01	0.18677	0.249133	7.69568	0.0213257	0.477101	ENST00000265909	SNX19	11	399979	uc001qgk.4	SNX19	protein_coding	130875436	130916509	42.46
ENSG00000229204	34.9003	4.38034	1.49017	7.69126	0.021373	NA	ENST00000511479	PTGES3P3	4	NA		PTGES3P3	processed_pseudogene	169791221	169791702	37.76
ENSG00000174130	3016.75	-0.130906	0.276497	7.68852	0.0214022	0.477101	ENST00000381950	TLR6	4	10333	uc010ifg.2	TLR6	protein_coding	38823715	38856817	39.76
ENSG00000162892	6434.73	-0.1768	0.157601	7.68848	0.0214027	0.477101	ENST00000391929	IL24	1	11009	uc001heu.2	IL24	protein_coding	206897443	206904139	48.47
ENSG00000238083	1029.55	0.676958	0.249074	7.67809	0.0215141	0.477101	ENST00000576629	LRRC37A2	17	9884	uc002ikn.1	LRRC37A2	protein_coding	46511511	46555650	42.64
ENSG00000275367	26.5785	3.81606	3.07183	7.67777	0.0215176	NA	ENST00000618256		12	NA		RP11-266K4.14	lincRNA	8217758	8221115	48.36
ENSG00000140090	31.1558	-9.29558	2.6191	7.67426	0.0215554	NA	ENST00000393265	SLC24A4	14	123041	uc001yai.3	SLC24A4	protein_coding	92322581	92501483	47.94
ENSG00000111860	2226.91	0.228372	0.188995	7.66493	0.0216561	0.477101	ENST00000368491	CEP85L	6	387119	uc003pxz.2	CEP85L	protein_coding	118460772	118710075	38.17
ENSG00000162676	41.1094	-7.76696	2.16926	7.66419	0.0216642	NA	ENST00000370332	GFI1	1	2672	uc001dou.4	GFI1	protein_coding	92474762	92486876	55.35
ENSG00000183171	21.8964	2.11184	1.90305	7.65497	0.0217643	NA	ENST00000332359		X	NA		RP11-49C9.2	processed_pseudogene	150114378	150116520	39.66
ENSG00000099326	2865.14	0.0791446	0.220485	7.65455	0.0217688	0.477101	ENST00000600004	MZF1	19	7593		MZF1	protein_coding	58561931	58573575	55.33
ENSG00000160310	3499.23	0.307009	0.194106	7.65253	0.0217908	0.477101	ENST00000355680	PRMT2	21	3275	uc002zjx.4	PRMT2	protein_coding	46635167	46665124	45.52
ENSG00000167483	62753.5	0.0857102	0.0809691	7.65013	0.021817	0.477101	ENST00000595684	FAM129C	19	199786	uc032hoz.1	FAM129C	protein_coding	17523301	17553839	52.51
ENSG00000147140	10722.8	-0.138342	0.0991747	7.64491	0.021874	0.477101	ENST00000276079	NONO	X	4841	uc004dzn.4	NONO	protein_coding	71283192	71301168	44.11
ENSG00000163534	44497.5	-0.0641197	0.128773	7.64249	0.0219005	0.477101	ENST00000463001	FCRL1	1	115350	uc001frf.3	FCRL1	protein_coding	157794403	157820105	41.02
ENSG00000075151	4483.86	0.267081	0.134944	7.63734	0.021957	0.477101	ENST00000264211	EIF4G3	1	8672	uc010odj.2	EIF4G3	protein_coding	20806292	21176888	39.36
ENSG00000164099	40.2703	-9.43488	2.78276	7.63553	0.0219769	NA	ENST00000296498	PRSS12	4	8492	uc003ica.2	PRSS12	protein_coding	118280038	118353003	36.51
ENSG00000105926	1874.69	0.248457	0.237721	7.63173	0.0220186	0.477101	ENST00000432190	MPP6	7	51678		MPP6	protein_coding	24573268	24694193	35.88
ENSG00000266338	3937.48	-0.0614075	0.228708	7.62419	0.0221018	0.477101	ENST00000488031	NBPF15	1	284565	uc031ure.1	NBPF15	protein_coding	144421386	144461674	42.75
ENSG00000090006	2429.17	-0.10192	0.194777	7.62025	0.0221455	0.477101	ENST00000600026	LTBP4	19	8425		LTBP4	protein_coding	40592883	40629818	56.48
ENSG00000041802	2322.51	-0.273014	0.29974	7.61997	0.0221485	0.477101	ENST00000265245	LSG1	3	55341	uc003fui.3	LSG1	protein_coding	194640788	194672477	41.69
ENSG00000232553	120.302	-0.465508	0.927007	7.60381	0.0223282	NA	ENST00000416636		7	NA		AC006026.10	processed_pseudogene	23585062	23586355	52.63
ENSG00000179632	6574.88	0.0362448	0.188874	7.59901	0.0223819	0.480552	ENST00000322428	MAF1	8	84232	uc003zbc.1	MAF1	protein_coding	144104499	144107611	63.19
ENSG00000233024	20.0469	-2.15177	1.12338	7.59709	0.0224033	NA	ENST00000545114		16	100288332	uc002dfc.4	RP11-1212A22.4	protein_coding	18358086	18379331	48.8
ENSG00000138670	2226.76	-0.0255815	0.289064	7.58344	0.0225568	0.48273	ENST00000509081	RASGEF1B	4	153020	uc003hmj.1	RASGEF1B	protein_coding	81426393	82044244	39.05
ENSG00000270956	54.8938	0.380498	1.92606	7.57699	0.0226297	NA	ENST00000604692		2	NA		RP11-65L3.4	antisense	178541125	178541799	36.15
ENSG00000065802	2351.26	-0.434282	0.205808	7.5742	0.0226613	0.483391	ENST00000463352	ASB1	2	51665		ASB1	protein_coding	238426742	238452250	47.31
ENSG00000213676	7716.06	0.0634138	0.12058	7.56649	0.0227487	0.483687	ENST00000494022	ATF6B	6	1388	uc010jts.1	ATF6B	protein_coding	32098176	32128253	50.77
ENSG00000255318	40.6934	-9.68974	2.80324	7.53577	0.0231009	NA	ENST00000533311		11	NA		RP11-655M14.13	lincRNA	67618279	67627304	50.34
ENSG00000122786	29.1854	5.94585	2.63578	7.53309	0.0231318	NA	ENST00000417172	CALD1	7	800	uc003vsb.3	CALD1	protein_coding	134744252	134970728	40.05
ENSG00000117477	17.2982	8.30753	3.05643	7.52983	0.0231696	NA	ENST00000367806	CCDC181	1	57821	uc001gga.1	CCDC181	protein_coding	169394870	169460669	36.8
ENSG00000136250	55.781	1.24384	1.60773	7.51813	0.0233056	NA	ENST00000617537	AOAH	7	313	uc032zjw.1	AOAH	protein_coding	36512949	36724549	41.56
ENSG00000250751	8.05329	2.95784	1.74606	7.51574	0.0233334	NA	ENST00000512720		17	NA		RP11-613C6.2	antisense	49708334	49720060	48.84
ENSG00000225125	38.3933	-1.86285	3.48438	7.51539	0.0233375	NA	ENST00000413361	RANP4	X	NA		RANP4	processed_pseudogene	136807223	136807877	40.92
ENSG00000104643	1222.65	0.545194	0.242626	7.51307	0.0233646	0.495179	ENST00000221086	MTMR9	8	66036	uc003wtm.3	MTMR9	protein_coding	11284416	11328146	37.85
ENSG00000095637	60.6882	-0.117462	1.53186	7.50985	0.0234022	NA	ENST00000371227	SORBS1	10	10580	uc001kkw.3	SORBS1	protein_coding	95311771	95561414	44.47
ENSG00000136040	2162.17	0.363393	0.252404	7.50444	0.0234656	0.495721	ENST00000258526	PLXNC1	12	10154	uc001tdc.3	PLXNC1	protein_coding	94148723	94307675	43.75
ENSG00000228369	41.9392	-15.1957	3.48438	7.50368	0.0234746	NA	ENST00000428794	TXNDC12-AS1	1	104355143		TXNDC12-AS1	antisense	52050918	52052683	43.09
ENSG00000102221	739.053	-0.581952	0.382489	7.49324	0.0235973	NA	ENST00000424392	JADE3	X	9767	uc033ebv.1	JADE3	protein_coding	46912276	47061242	40.39
ENSG00000229897	13.3056	-3.84121	1.83064	7.49219	0.0236098	NA	ENST00000420492	SEPT7P7	9	NA		SEPT7P7	processed_pseudogene	98606833	98608133	40.89
ENSG00000235095	39.0614	3.31749	1.45857	7.48811	0.023658	NA	ENST00000433031		7	NA		RP11-1217F2.1	unprocessed_pseudogene	57147986	57150347	41.62
ENSG00000130508	64.9355	1.88531	1.84834	7.48294	0.0237193	NA	ENST00000252804	PXDN	2	7837	uc002qxa.3	PXDN	protein_coding	1631887	1744852	49.9
ENSG00000107290	14311.8	-0.00785435	0.11119	7.46582	0.0239231	0.503765	ENST00000477049	SETX	9	23064		SETX	protein_coding	132261356	132354985	41
ENSG00000184719	173.974	0.294228	1.22183	7.45818	0.0240147	NA	ENST00000371947	RNLS	10	55328	uc001kfd.2	RNLS	protein_coding	88273864	88584530	36.76
ENSG00000230869	43.3488	-3.27862	1.7843	7.45399	0.0240651	NA	ENST00000454844	CTGLF10P	10	NA		CTGLF10P	unprocessed_pseudogene	45678692	45700532	40.58
ENSG00000100503	11818.2	0.0377877	0.112323	7.44945	0.0241198	0.505084	ENST00000476352	NIN	14	51199	uc001wyi.3	NIN	protein_coding	50719763	50831121	41.15
ENSG00000258454	36.7052	-11.1536	3.48438	7.44622	0.0241587	NA	ENST00000554225		14	NA		RP11-361H10.3	sense_overlapping	76235817	76263474	42.99
ENSG00000168159	2309.38	-0.137713	0.214198	7.44551	0.0241673	0.505084	ENST00000305943	RNF187	1	149603	uc001htb.3	RNF187	protein_coding	228487061	228495766	56.59
ENSG00000234801	10.8415	-2.38674	1.64063	7.4444	0.0241807	NA	ENST00000447135	MORF4	4	NA		MORF4	processed_pseudogene	173615936	173616906	42.95
ENSG00000133466	1357.82	-0.0980413	0.298855	7.4401	0.0242327	0.505084	ENST00000397110	C1QTNF6	22	114904	uc003aqx.1	C1QTNF6	protein_coding	37180167	37199385	50.64
ENSG00000139718	3612.89	0.0141168	0.183157	7.43511	0.0242933	0.505084	ENST00000604567	SETD1B	12	23067	uc001ubi.3	SETD1B	protein_coding	121804180	121832584	56.82
ENSG00000260693	27.7221	-15.7479	3.32566	7.42054	0.0244709	NA	ENST00000562992		15	NA		AC026150.8	lincRNA	30540093	30545969	39.95
ENSG00000272386	12.8662	-6.26912	2.48982	7.41627	0.0245232	NA	ENST00000607478		17	NA		RP11-666A8.12	sense_intronic	76551352	76551750	38.35
ENSG00000095587	39.0617	1.67376	1.65309	7.41392	0.0245521	NA	ENST00000357947	TLL2	10	7093	uc001kml.2	TLL2	protein_coding	96364606	96513918	46.43
ENSG00000107521	6378.34	-0.0641317	0.09609	7.40103	0.0247109	0.51164	ENST00000361490	HPS1	10	3257	uc021pwv.1	HPS1	protein_coding	98416198	98446947	49.72
ENSG00000270137	39.1697	-14.8711	3.48438	7.3983	0.0247445	NA	ENST00000602328		8	NA		CTC-137K3.1	sense_intronic	132826179	132826903	36.55
ENSG00000167123	32.506	0.0895734	1.68277	7.39602	0.0247728	NA	ENST00000420034	CERCAM	9	51148		CERCAM	protein_coding	128411751	128437351	55.11
ENSG00000064393	2198.66	0.0127612	0.409023	7.39436	0.0247934	0.51164	ENST00000406875	HIPK2	7	28996	uc003vvf.4	HIPK2	protein_coding	139561570	139777778	45.62
ENSG00000211662	3152.75	0.0736517	0.479475	7.39042	0.0248422	0.51164	ENST00000390308	IGLV3-21	22	NA		IGLV3-21	IG_V_gene	22711689	22713203	54.32
ENSG00000130779	2692.23	-0.04774	0.178151	7.366	0.0251474	0.516307	ENST00000361654	CLIP1	12	6249	uc001uci.1	CLIP1	protein_coding	122271432	122422632	43.88
ENSG00000258199	39.3742	1.69155	1.75655	7.36193	0.0251986	NA	ENST00000553176		12	NA		RP11-977G19.5	sense_overlapping	56162359	56190284	49.39
ENSG00000148248	2603.75	0.162588	0.242584	7.35534	0.0252818	0.51745	ENST00000371989	SURF4	9	6836	uc004cdj.4	SURF4	protein_coding	133361449	133376166	52.38
ENSG00000262222	1385.57	-0.399552	0.245238	7.3441	0.0254243	0.518091	ENST00000573379		16	100505564		RP11-876N24.4	antisense	10940719	10943021	62.35
ENSG00000128242	14.8862	7.56167	2.78698	7.34317	0.0254361	NA	ENST00000406955	GAL3ST1	22	9514	uc003aih.1	GAL3ST1	protein_coding	30554635	30574587	53.55
ENSG00000123066	6476.33	0.0464642	0.131907	7.34044	0.0254709	0.518091	ENST00000281928	MED13L	12	23389	uc001tvw.3	MED13L	protein_coding	115953872	116277338	37.29
ENSG00000214535	190.27	-0.0205938	0.499141	7.33823	0.0254991	NA	ENST00000457423	RPS15AP1	20	NA		RPS15AP1	processed_pseudogene	21166206	21166596	46.29
ENSG00000185885	948.143	0.0245885	0.31949	7.32544	0.0256627	NA	ENST00000525554	IFITM1	11	8519		IFITM1	protein_coding	313506	315272	57.05
ENSG00000255836	24.608	-0.548152	0.903809	7.31611	0.0257827	NA	ENST00000538078		12	NA		RP11-157G21.2	processed_pseudogene	7438780	7439990	46.24
ENSG00000228409	715.468	0.503099	0.371737	7.30724	0.0258972	NA	ENST00000434500	CCT6P1	7	NA	uc003tug.3	CCT6P1	transcribed_unprocessed_pseudogene	65751142	65763354	40.94
ENSG00000168079	45.5456	7.6061	2.66234	7.30683	0.0259025	NA	ENST00000354914	SCARA5	8	286133	uc003xgj.3	SCARA5	protein_coding	27869882	27992727	49.04
ENSG00000272989	52.2979	-8.9541	2.46611	7.30455	0.0259321	NA	ENST00000608206		3	100129516		RP13-616I3.1	lincRNA	197505262	197506986	56.75
ENSG00000100029	2418.53	-0.475164	0.285507	7.3012	0.0259755	0.525236	ENST00000354694	PES1	22	23481	uc003aij.2	PES1	protein_coding	30576625	30607083	50.48
ENSG00000133872	13729.7	0.132113	0.168989	7.29896	0.0260046	0.525236	ENST00000256255	SARAF	8	51669	uc003xhs.4	SARAF	protein_coding	30063012	30083208	40.19
ENSG00000260005	904.316	-1.11596	0.456162	7.29267	0.0260866	NA	ENST00000575922		17	NA	uc002jzw.1	AC027601.1	antisense	81228707	81233983	64.58
ENSG00000160294	6025.15	0.243013	0.175899	7.28896	0.026135	0.525236	ENST00000467026	MCM3AP	21	8888		MCM3AP	protein_coding	46235126	46286297	47.4
ENSG00000138115	58.0616	-0.192871	1.97373	7.28653	0.0261668	NA	ENST00000527420	CYP2C8	10	1558	uc001kkb.3	CYP2C8	protein_coding	95036772	95069497	37.59
ENSG00000123268	1481.93	-0.856511	0.542972	7.28594	0.0261745	0.525236	ENST00000552510	ATF1	12	466	uc001rww.4	ATF1	protein_coding	50763710	50821122	41.93
ENSG00000136828	1415.21	0.506866	0.513975	7.28233	0.0262218	0.525236	ENST00000259351	RALGPS1	9	9649	uc004bqo.2	RALGPS1	protein_coding	126914774	127223166	46.49
ENSG00000169714	11961.3	-0.0939176	0.132909	7.27279	0.0263472	0.526142	ENST00000502976	CNBP	3	7555	uc003elr.4	CNBP	protein_coding	129169484	129183922	42.41
ENSG00000231434	4.50468	5.58038	2.19181	7.27077	0.0263737	NA	ENST00000436135		1	NA		RP11-144L1.8	processed_pseudogene	158523672	158525838	39.96
ENSG00000233155	16.3436	5.19579	1.85758	7.263	0.0264764	NA	ENST00000414130	HMGA1P8	2	NA		HMGA1P8	processed_pseudogene	74418122	74418442	59.5
ENSG00000235072	79.857	-2.48635	2.21245	7.25052	0.0266422	NA	ENST00000313031		2	NA		AC012074.2	lincRNA	25369136	25375845	53.34
ENSG00000242622	49.3672	-23.4722	2.28992	7.24968	0.0266533	NA	ENST00000484076		3	NA	uc003edp.3	RP11-18H7.1	lincRNA	120094895	120136783	41.62
ENSG00000225704	13.297	-0.0611607	3.48438	7.24445	0.0267231	NA	ENST00000450334		1	NA		RP4-798A17.5	processed_pseudogene	171345089	171345320	42.67
ENSG00000154262	23.7839	-5.27685	2.61231	7.24372	0.0267329	NA	ENST00000284425	ABCA6	17	23460	uc002jhw.1	ABCA6	protein_coding	69078702	69141888	36.3
ENSG00000172731	108.66	-22.9221	2.73584	7.23674	0.0268263	NA	ENST00000355790	LRRC20	10	55222	uc001jqx.2	LRRC20	protein_coding	70298970	70382650	49.41
ENSG00000099204	9558.23	-0.0435348	0.0995545	7.2311	0.0269022	0.534212	ENST00000392952	ABLIM1	10	3983	uc031wts.1	ABLIM1	protein_coding	114431113	114685003	42.59
ENSG00000136141	2217.94	0.329058	0.192669	7.22257	0.0270171	0.534212	ENST00000311191	LRCH1	13	23143	uc001vbl.4	LRCH1	protein_coding	46553168	46753040	40.02
ENSG00000174282	4646.23	-0.408739	0.174638	7.22154	0.027031	0.534212	ENST00000380599	ZBTB4	17	57659	uc002ghc.4	ZBTB4	protein_coding	7459366	7484263	54.92
ENSG00000164649	7127.14	0.275572	0.173254	7.21818	0.0270765	0.534212	ENST00000356195	CDCA7L	7	55536	uc003sve.4	CDCA7L	protein_coding	21900900	21946084	41.49
ENSG00000230756	14.1726	4.19815	1.50276	7.21303	0.0271463	NA	ENST00000437982	RHOQP3	2	NA		RHOQP3	processed_pseudogene	130212870	130213490	46.54
ENSG00000268093	34.4848	-0.00774196	1.88141	7.19676	0.027368	NA	ENST00000600303		19	NA		AC022154.7	antisense	48619272	48624132	50.5
ENSG00000213492	39.4836	1.84023	0.809669	7.1908	0.0274497	NA	ENST00000441170	NT5C3AP1	4	NA		NT5C3AP1	transcribed_processed_pseudogene	117574512	117576174	38.48
ENSG00000100359	11634.8	0.189072	0.149082	7.18222	0.0275677	0.539506	ENST00000457767	SGSM3	22	27352	uc010gyc.1	SGSM3	protein_coding	40370591	40410289	47.84
ENSG00000131080	20.5673	-3.55454	2.00229	7.18129	0.0275806	NA	ENST00000374719	EDA2R	X	60401	uc004dws.3	EDA2R	protein_coding	66595637	66639298	39.73
ENSG00000132600	2372.65	-0.503934	0.215014	7.17432	0.0276769	0.539506	ENST00000566657	PRMT7	16	54496		PRMT7	protein_coding	68310974	68358563	48.59
ENSG00000123009	27.9993	-1.47782	0.744265	7.17278	0.0276982	NA	ENST00000426182	NME2P1	12	NA		NME2P1	processed_pseudogene	120282303	120282716	52.9
ENSG00000204237	1338.32	0.27001	0.203407	7.1722	0.0277061	0.539506	ENST00000374741	OXLD1	17	339229	uc002kba.3	OXLD1	protein_coding	81665036	81666635	62.12
ENSG00000015676	3514.11	0.428416	0.176517	7.17013	0.0277348	0.539506	ENST00000355451	NUDCD3	7	23386	uc003tkz.3	NUDCD3	protein_coding	44379121	44490880	44.52
ENSG00000109436	8648.98	0.0224694	0.173287	7.16865	0.0277554	0.539506	ENST00000442267	TBC1D9	4	23158	uc010ioj.3	TBC1D9	protein_coding	140620765	140756120	41.09
ENSG00000104341	40.5515	-0.0814852	2.20031	7.15592	0.0279327	NA	ENST00000445593	LAPTM4B	8	55353	uc003yia.3	LAPTM4B	protein_coding	97775057	97853013	44
ENSG00000138785	833.836	0.470856	0.555695	7.15321	0.0279705	NA	ENST00000394735	INTS12	4	57117	uc010ilr.3	INTS12	protein_coding	105682627	105895986	36.56
ENSG00000266980	62.9857	1.5376	1.48193	7.1451	0.0280842	NA	ENST00000586808		17	NA		RP11-552F3.4	antisense	75818815	75820055	57.7
ENSG00000182568	3565.13	0.244458	0.274302	7.14227	0.0281239	0.545056	ENST00000450898	SATB1	3	6304		SATB1	protein_coding	18345387	18445588	36.43
ENSG00000092068	15.9179	7.13734	2.33892	7.13719	0.0281954	NA	ENST00000339733	SLC7A8	14	23428	uc010tnl.3	SLC7A8	protein_coding	23125295	23183674	47.13
ENSG00000117322	6470.02	0.258395	0.133403	7.13269	0.028259	0.546063	ENST00000367058	CR2	1	1380	uc001hfw.3	CR2	protein_coding	207454230	207489895	39.17
ENSG00000248795	7.66763	-3.83453	1.55321	7.12789	0.0283269	NA	ENST00000502915		4	NA		RP11-173E2.1	processed_pseudogene	138560704	138561941	55.98
ENSG00000175073	3044.5	-0.0798921	0.202536	7.12453	0.0283744	0.546686	ENST00000310421	VCPIP1	8	80124	uc003xwn.3	VCPIP1	protein_coding	66628487	66667217	39.75
ENSG00000211968	232.432	2.22369	1.00686	7.12311	0.0283947	NA	ENST00000390628	IGHV1-58	14	NA		IGHV1-58	IG_V_gene	106622357	106622855	55.31
ENSG00000261441	19.8142	8.50989	3.36272	7.12152	0.0284173	NA	ENST00000569473		15	NA		RP11-217B1.2	antisense	89335053	89336161	53.02
ENSG00000243244	144.396	0.12318	1.47119	7.11752	0.0284742	NA	ENST00000484110	STON1	2	11037		STON1	protein_coding	48529383	48598513	45.18
ENSG00000267253	5.87082	3.19073	1.60843	7.10985	0.0285835	NA	ENST00000587110		17	NA		RP11-209M4.1	processed_pseudogene	43718314	43720436	44.14
ENSG00000223946	43.4394	-0.43421	1.94956	7.1016	0.0287017	NA	ENST00000412701		6	NA		RP11-533O20.2	lincRNA	42030053	42031382	57.89
ENSG00000178425	2419.9	0.166293	0.289108	7.08859	0.028889	0.552544	ENST00000319550	NT5DC1	6	221294	uc003pwj.3	NT5DC1	protein_coding	116100849	116249497	36.29
ENSG00000164808	3188.14	0.0237369	0.188363	7.08478	0.0289441	0.552544	ENST00000297423	SPIDR	8	23514	uc003xqd.4	SPIDR	protein_coding	47260575	47736306	40.78
ENSG00000224660	2515.72	0.247512	0.273563	7.07822	0.0290391	0.552544	ENST00000420195	SH3BP5-AS1	3	100505696	uc003bzo.2	SH3BP5-AS1	antisense	15254184	15264493	45.6
ENSG00000089737	6921.53	0.187348	0.104556	7.06789	0.0291895	0.552544	ENST00000621632	DDX24	14	57062	uc001ycj.3	DDX24	protein_coding	94048291	94081245	43.37
ENSG00000113721	24.1483	0.246302	1.66895	7.06539	0.029226	NA	ENST00000261799	PDGFRB	5	5159	uc003lro.3	PDGFRB	protein_coding	150113837	150155872	54.34
ENSG00000196189	1092.82	-0.184716	0.576325	7.06184	0.029278	0.552544	ENST00000435124	SEMA4A	1	64218	uc001fno.3	SEMA4A	protein_coding	156147366	156177752	51.59
ENSG00000141456	3025.35	0.123799	0.225972	7.06057	0.0292966	0.552544	ENST00000572293	PELP1	17	27043	uc002fyi.5	PELP1	protein_coding	4669774	4704337	48.03
ENSG00000213090	89.8057	-1.13079	1.43711	7.05934	0.0293145	NA	ENST00000392253		2	NA		AC007256.5	processed_pseudogene	201410544	201413308	38.19
ENSG00000167548	9149.01	0.0483713	0.15095	7.05789	0.0293358	0.552544	ENST00000301067	KMT2D	12	8085	uc001rta.4	KMT2D	protein_coding	49018975	49059774	54.13
ENSG00000142864	7061.79	0.0227359	0.162559	7.05253	0.0294145	0.552544	ENST00000370994	SERBP1	1	26135	uc001ddy.3	SERBP1	protein_coding	67407810	67430415	38.87
ENSG00000089163	37.2209	-0.171891	1.76711	7.05177	0.0294258	NA	ENST00000536460	SIRT4	12	23409		SIRT4	protein_coding	120302316	120313249	48.77
ENSG00000165359	4281.64	-0.132817	0.169444	7.04471	0.0295298	0.552544	ENST00000370752	DDX26B	X	203522	uc004eyw.4	DDX26B	protein_coding	135520659	135582510	38.59
ENSG00000177103	17.6965	-6.45103	2.39701	7.03846	0.0296222	NA	ENST00000527706	DSCAML1	11	57453	uc001prh.1	DSCAML1	protein_coding	117427773	117817525	50.08
ENSG00000166501	30194.2	0.045685	0.062844	7.03829	0.0296247	0.552544	ENST00000321728	PRKCB	16	5579	uc002dmd.3	PRKCB	protein_coding	23836001	24220611	43.77
ENSG00000164244	1834.05	0.121504	0.222025	7.03373	0.0296923	0.552544	ENST00000296666	PRRC1	5	133619	uc003kuk.4	PRRC1	protein_coding	127517609	127555089	36.29
ENSG00000253520	28.0255	-7.0426	3.48438	7.03137	0.0297275	NA	ENST00000521868		5	NA		RP11-798K23.5	processed_pseudogene	179527224	179527513	42.07
ENSG00000143297	15763.8	-0.237936	0.302572	7.0214	0.029876	0.552544	ENST00000462218	FCRL5	1	83416		FCRL5	protein_coding	157513377	157552520	42.97
ENSG00000182718	2713.59	-0.455385	0.292301	7.01579	0.0299599	0.552544	ENST00000396024	ANXA2	15	302	uc002agn.3	ANXA2	protein_coding	60347134	60402883	44.95
ENSG00000196504	4885.55	-0.119277	0.157964	7.01149	0.0300244	0.552544	ENST00000410080	PRPF40A	2	55660	uc002tyh.4	PRPF40A	protein_coding	152651593	152717997	36.31
ENSG00000034713	2295.61	0.528914	0.202002	7.00824	0.0300732	0.552544	ENST00000037243	GABARAPL2	16	11345	uc002fen.3	GABARAPL2	protein_coding	75566351	75577881	47.18
ENSG00000175130	2855.83	0.119755	0.216774	7.00595	0.0301078	0.552544	ENST00000329421	MARCKSL1	1	65108	uc001bvd.4	MARCKSL1	protein_coding	32333832	32336379	64.21
ENSG00000176542	4682.5	0.25461	0.181807	7.00592	0.0301082	0.552544	ENST00000491165	KIAA2018	3	205717	uc003eam.3	KIAA2018	protein_coding	113648385	113696646	40.61
ENSG00000145348	1478.77	-0.0413404	0.286966	6.99087	0.0303355	0.555165	ENST00000273980	TBCK	4	93627	uc003hyf.2	TBCK	protein_coding	106041599	106321495	35.98
ENSG00000213859	653.485	0.65443	0.356029	6.98701	0.0303942	NA	ENST00000576980	KCTD11	17	147040		KCTD11	protein_coding	7351889	7354944	60.44
ENSG00000114395	1197.52	-0.606812	0.322321	6.97289	0.0306095	0.557356	ENST00000425346	CYB561D2	3	11068	uc003dam.3	CYB561D2	protein_coding	50350695	50358460	55
ENSG00000205609	45.0775	-0.202282	0.600324	6.97258	0.0306143	NA	ENST00000380876	EIF3CL	16	728689	uc002dpi.5	EIF3CL	protein_coding	28379579	28403879	47.26
ENSG00000167515	1059.96	-0.588708	0.234729	6.97188	0.0306249	0.557356	ENST00000564365	TRAPPC2L	16	51693		TRAPPC2L	protein_coding	88856220	88862686	58.39
ENSG00000175730	54.2196	0.710258	1.48258	6.9718	0.0306262	NA	ENST00000317045	BAK1P1	20	NA		BAK1P1	processed_pseudogene	32690180	32690815	59.12
ENSG00000278987	75.4604	-1.75291	1.97104	6.96998	0.0306541	NA	ENST00000624137		16	NA		LA16c-431H6.7	TEC	1688355	1690536	45
ENSG00000185436	2009.05	-0.00490156	0.221694	6.96436	0.0307404	0.557912	ENST00000327535	IFNLR1	1	163702	uc001bis.3	IFNLR1	protein_coding	24154157	24187959	47.37
ENSG00000213051	11.1649	5.84369	2.44581	6.95742	0.0308471	NA	ENST00000392009	RPL5P5	1	NA		RPL5P5	processed_pseudogene	185226808	185227700	41.88
ENSG00000197457	3253.46	-0.104575	0.231589	6.94972	0.0309661	0.559025	ENST00000370053	STMN3	20	50861	uc002yfr.2	STMN3	protein_coding	63639705	63653427	60.45
ENSG00000153922	4761.99	0.214191	0.190896	6.94935	0.0309719	0.559025	ENST00000614616	CHD1	5	1105	uc003knf.3	CHD1	protein_coding	98853985	98928957	35.16
ENSG00000164855	24.8514	5.00867	1.81549	6.93738	0.0311578	NA	ENST00000297477	TMEM184A	7	202915	uc003skv.4	TMEM184A	protein_coding	1542235	1560821	62.84
ENSG00000230393	12.7853	-6.31696	1.98435	6.93136	0.0312517	NA	ENST00000434301		2	NA		AC092667.2	antisense	100104919	100107504	51.74
ENSG00000247315	1865.38	-0.504706	0.278695	6.92793	0.0313054	0.55925	ENST00000500893	ZCCHC3	20	85364	uc032oxz.1	ZCCHC3	protein_coding	296968	300321	55.16
ENSG00000137411	2657.26	0.0899817	0.149282	6.9235	0.0313748	0.55925	ENST00000477288	VARS2	6	57176		VARS2	protein_coding	30908242	30926459	53.81
ENSG00000170476	5395.24	-0.228516	0.228032	6.92253	0.03139	0.55925	ENST00000503481	MZB1	5	51237	uc003lei.3	MZB1	protein_coding	139387480	139390081	58.38
ENSG00000126821	1381.95	-0.275962	0.264016	6.92175	0.0314023	0.55925	ENST00000247225	SGPP1	14	81537	uc001xgj.4	SGPP1	protein_coding	63684214	63728039	39.66
ENSG00000066084	4596.64	-0.342222	0.210346	6.91587	0.0314947	0.55925	ENST00000549620	DIP2B	12	57609		DIP2B	protein_coding	50504985	50748667	41.84
ENSG00000021776	2187.37	0.639108	0.246791	6.91363	0.03153	0.55925	ENST00000156471	AQR	15	9716	uc001ziv.3	AQR	protein_coding	34851782	34969839	37.54
ENSG00000231043	1873.75	0.384998	0.192714	6.90458	0.031673	0.55925	ENST00000434096		2	NA		AC007238.1	processed_pseudogene	58460292	58462032	48.19
ENSG00000268140	32.2795	2.32732	1.62087	6.90262	0.031704	NA	ENST00000595406	PCGF7P	19	NA		PCGF7P	processed_pseudogene	22137931	22138981	49.19
ENSG00000163703	1715.51	-0.433355	0.24001	6.90169	0.0317188	0.55925	ENST00000397170	CRELD1	3	78987	uc003buh.3	CRELD1	protein_coding	9933822	9945413	51.58
ENSG00000086758	10410.9	-0.134029	0.167881	6.89666	0.0317987	0.55925	ENST00000426907	HUWE1	X	10075		HUWE1	protein_coding	53532096	53686729	41.2
ENSG00000253873	4.74197	0.0590972	2.49065	6.88842	0.03193	NA	ENST00000622044	PCDHGA11	5	56105	uc003lko.1	PCDHGA11	protein_coding	141421047	141512979	45.42
ENSG00000138172	538.34	-1.32628	0.716482	6.88563	0.0319746	NA	ENST00000369788	CALHM2	10	51063	uc001kxb.3	CALHM2	protein_coding	103446786	103452402	55.67
ENSG00000007312	41129.7	0.0776778	0.115025	6.88385	0.032003	0.55925	ENST00000392795	CD79B	17	974	uc002jdp.1	CD79B	protein_coding	63928740	63932354	60.69
ENSG00000151458	70.3752	0.308676	1.80482	6.88198	0.0320329	NA	ENST00000504087	ANKRD50	4	57182	uc010inw.3	ANKRD50	protein_coding	124664052	124712732	35.15
ENSG00000103168	5574.95	-0.0571831	0.131523	6.87878	0.0320842	0.55925	ENST00000341690	TAF1C	16	9013	uc002fhm.3	TAF1C	protein_coding	84177847	84187070	59.13
ENSG00000107937	1776.69	0.280269	0.256115	6.87577	0.0321325	0.55925	ENST00000360803	GTPBP4	10	23560	uc001ift.3	GTPBP4	protein_coding	988019	1019936	47.14
ENSG00000225026	6.09549	5.81506	2.61444	6.87086	0.0322116	NA	ENST00000419844		3	NA		AC091492.2	processed_pseudogene	12328003	12328274	40.81
ENSG00000203760	10.5105	-6.70642	2.68751	6.8622	0.0323513	NA	ENST00000368326	CENPW	6	387103	uc032xlg.1	CENPW	protein_coding	126340174	126348875	35.46
ENSG00000118058	9579.36	-0.0863351	0.144155	6.85956	0.0323941	0.55925	ENST00000534358	KMT2A	11	4297	uc001ptb.3	KMT2A	protein_coding	118436490	118526832	41.25
ENSG00000241106	10170.6	0.0655769	0.140243	6.85639	0.0324455	0.55925	ENST00000488325	HLA-DOB	6	3112	uc003oca.3	HLA-DOB	protein_coding	32812763	32817048	45.19
ENSG00000225783	2185.14	-0.386449	0.471667	6.85309	0.0324991	0.55925	ENST00000421867	MIAT	22	440823		MIAT	lincRNA	26646428	26676475	49.99
ENSG00000186432	3363.12	0.346612	0.185629	6.84759	0.0325885	0.55925	ENST00000334256	KPNA4	3	3840	uc003fdn.3	KPNA4	protein_coding	160494995	160565588	37.2
ENSG00000187239	9152.64	0.029017	0.10833	6.84464	0.0326367	0.55925	ENST00000446176	FNBP1	9	23048	uc004byw.1	FNBP1	protein_coding	129887187	130043194	43.76
ENSG00000159648	26.955	8.42483	2.49613	6.83946	0.0327213	NA	ENST00000290871	TEPP	16	374739	uc002emv.4	TEPP	protein_coding	57976435	57988116	50.91
ENSG00000198585	1177.94	-0.350696	0.299408	6.83543	0.0327873	0.55925	ENST00000521288	NUDT16	3	131870	uc003eog.2	NUDT16	protein_coding	131381671	131388830	48.83
ENSG00000125482	1559.92	0.162833	0.251766	6.83389	0.0328125	0.55925	ENST00000334270	TTF1	9	7270	uc004cbl.4	TTF1	protein_coding	132375548	132406851	44.83
ENSG00000255518	1184.36	-0.407171	0.325777	6.83261	0.0328335	0.55925	ENST00000528629		8	NA		RP11-148O21.4	antisense	11556251	11558022	57.62
ENSG00000138363	2634.84	-0.172612	0.252899	6.83219	0.0328404	0.55925	ENST00000236959	ATIC	2	471	uc002vex.4	ATIC	protein_coding	215311817	215349773	41.16
ENSG00000067167	6428.45	-0.0800026	0.171539	6.83118	0.032857	0.55925	ENST00000521425	TRAM1	8	23471	uc003xyo.2	TRAM1	protein_coding	70573442	70608387	38.27
ENSG00000237214	329.066	0.142012	0.310422	6.83105	0.0328592	NA	ENST00000418783		22	NA		RP11-12M9.3	processed_pseudogene	41064052	41064633	58.59
ENSG00000132016	9.76025	4.91352	2.3239	6.81235	0.0331678	NA	ENST00000588115	C19orf57	19	79173		C19orf57	protein_coding	13882348	13906452	52.62
ENSG00000085117	8682.23	-0.188198	0.188968	6.8096	0.0332135	0.560902	ENST00000526958	CD82	11	3732		CD82	protein_coding	44564427	44620363	53.55
ENSG00000113013	5577.8	0.088387	0.168907	6.80379	0.03331	0.560902	ENST00000297185	HSPA9	5	3313	uc003ldf.3	HSPA9	protein_coding	138554882	138575444	42.74
ENSG00000132182	15627.1	-0.000911686	0.101703	6.79794	0.0334077	0.560902	ENST00000254508	NUP210	3	23225	uc003bxv.2	NUP210	protein_coding	13316235	13420309	52.6
ENSG00000170876	2716.06	-0.2801	0.174933	6.79301	0.0334901	0.560902	ENST00000306077	TMEM43	3	79188	uc003byk.2	TMEM43	protein_coding	14124940	14143679	52.73
ENSG00000165732	5617.13	-0.230526	0.162512	6.791	0.0335239	0.560902	ENST00000354185	DDX21	10	9188	uc001jov.2	DDX21	protein_coding	68956128	68985073	41.17
ENSG00000279467	59.4898	-6.74726	2.05914	6.78294	0.0336591	NA	ENST00000624923		22	NA		KB-1125A3.12	antisense	23865248	23873277	49.38
ENSG00000152082	1241.61	-0.226197	0.338417	6.77679	0.0337628	0.560902	ENST00000425361	MZT2B	2	80097		MZT2B	protein_coding	130181737	130190729	57.61
ENSG00000136231	80.3813	-0.632207	1.86093	6.76892	0.033896	NA	ENST00000258729	IGF2BP3	7	10643	uc003swg.3	IGF2BP3	protein_coding	23310209	23470467	41.63
ENSG00000116151	542.613	0.159491	0.794347	6.76393	0.0339806	NA	ENST00000378531	MORN1	1	79906	uc001ajb.1	MORN1	protein_coding	2321253	2391707	57.29
ENSG00000161249	34.9953	0.780108	1.69195	6.76325	0.0339921	NA	ENST00000472365	DMKN	19	93099		DMKN	protein_coding	35497220	35513658	54.04
ENSG00000106069	47.1211	3.24381	2.05576	6.76293	0.0339976	NA	ENST00000582692	CHN2	7	1124		CHN2	protein_coding	29122274	29514328	42.02
ENSG00000013016	2251.81	-0.389458	0.256528	6.76195	0.0340143	0.560902	ENST00000322054	EHD3	2	30845	uc002rnu.3	EHD3	protein_coding	31234337	31269447	50.13
ENSG00000006576	2929.64	0.331226	0.149784	6.75988	0.0340495	0.560902	ENST00000422959	PHTF2	7	57157	uc003ugt.4	PHTF2	protein_coding	77798792	77957503	37.65
ENSG00000108523	4732.41	-0.466241	0.183817	6.75506	0.0341317	0.560902	ENST00000571816	RNF167	17	26001	uc002fzu.3	RNF167	protein_coding	4940008	4945222	52.54
ENSG00000159086	2051.87	0.0931947	0.284681	6.75488	0.0341347	0.560902	ENST00000331923	PAXBP1	21	94104	uc002yqn.3	PAXBP1	protein_coding	32733899	32771858	38.15
ENSG00000255857	161.404	-0.552526	1.50806	6.75301	0.0341666	NA	ENST00000542265	PXN-AS1	12	NA	uc021reu.1	PXN-AS1	antisense	120201291	120213138	49.38
ENSG00000044446	3044.53	0.284455	0.207497	6.75142	0.0341939	0.560902	ENST00000379942	PHKA2	X	5256	uc004cyv.4	PHKA2	protein_coding	18892300	18984598	45.75
ENSG00000237307	3.52759	-4.35455	1.94235	6.74486	0.0343061	NA	ENST00000426911	SRRM1P3	X	NA		SRRM1P3	processed_pseudogene	136976417	136985705	43.63
ENSG00000153015	1080.65	-0.104386	0.234159	6.74309	0.0343366	0.560902	ENST00000381070	CWC27	5	10283	uc003jtn.1	CWC27	protein_coding	64768930	65018763	35.58
ENSG00000211584	606.652	-0.959056	0.429925	6.73895	0.0344077	NA	ENST00000548498	SLC48A1	12	55652		SLC48A1	protein_coding	47753916	47782753	52.68
ENSG00000213762	1594.21	0.156713	0.253608	6.73884	0.0344096	0.560902	ENST00000597975	ZNF134	19	7693		ZNF134	protein_coding	57614233	57624723	46.33
ENSG00000048991	1771.43	0.112054	0.256442	6.7369	0.034443	0.560902	ENST00000483021	R3HDM1	2	23518		R3HDM1	protein_coding	135531455	135725270	37.98
ENSG00000077044	24071.6	-0.0705648	0.133886	6.73545	0.0344679	0.560902	ENST00000264057	DGKD	2	8527	uc002vui.1	DGKD	protein_coding	233354507	233472104	47.76
ENSG00000157540	5560.4	-0.0483742	0.157985	6.7349	0.0344775	0.560902	ENST00000608928	DYRK1A	21	1859		DYRK1A	protein_coding	37365790	37517450	38.86
ENSG00000170832	1747.35	-0.434985	0.312102	6.72829	0.0345916	0.560902	ENST00000300896	USP32	17	84669	uc002iyo.1	USP32	protein_coding	60179094	60422470	40.19
ENSG00000241255	16.9926	3.78105	2.13527	6.72734	0.034608	NA	ENST00000473603		11	NA		RP1-89D4.1	processed_pseudogene	33237008	33237409	44.53
ENSG00000168209	867.409	-1.03185	0.410927	6.72515	0.034646	NA	ENST00000307365	DDIT4	10	54541	uc001jsx.1	DDIT4	protein_coding	72273920	72276036	58.72
ENSG00000148218	2070.68	-0.366752	0.262939	6.72195	0.0347014	0.560902	ENST00000409155	ALAD	9	210	uc011lxf.2	ALAD	protein_coding	113386317	113401333	51.45
ENSG00000047457	54.1548	2.14305	1.20525	6.70859	0.0349341	NA	ENST00000481169	CP	3	1356	uc003ewz.3	CP	protein_coding	149162410	149222055	37.35
ENSG00000117385	1588.78	-0.229948	0.232171	6.7065	0.0349706	0.560902	ENST00000460031	P3H1	1	64175		P3H1	protein_coding	42746335	42767084	50.04
ENSG00000280387	33.31	0.358925	1.95483	6.69305	0.0352066	NA	ENST00000623967		20	NA		RP5-1153D9.5	TEC	56522252	56523499	49.36
ENSG00000066294	2832.54	0.303935	0.164975	6.69239	0.0352181	0.560902	ENST00000368054	CD84	1	8832	uc001fwf.4	CD84	protein_coding	160541095	160579516	41.6
ENSG00000231466	79.7345	3.31193	2.18174	6.69031	0.0352547	NA	ENST00000434827		22	NA		CTA-246H3.11	processed_pseudogene	25349543	25350322	41.79
ENSG00000169896	3447.95	-0.286925	0.271382	6.69018	0.0352571	0.560902	ENST00000287497	ITGAM	16	3684	uc002ebr.3	ITGAM	protein_coding	31259990	31332892	43.36
ENSG00000168283	2652.82	-0.0537176	0.194963	6.68813	0.0352932	0.560902	ENST00000376663	BMI1	10	648	uc001irh.3	BMI1	protein_coding	22321211	22331484	41.6
ENSG00000197558	55.6459	-0.869096	1.43225	6.68719	0.0353098	NA	ENST00000623373	SSPO	7	23145		SSPO	protein_coding	149776042	149833979	61.01
ENSG00000204991	21.1566	3.04076	1.97323	6.67799	0.0354726	NA	ENST00000564878	SPIRE2	16	84501		SPIRE2	protein_coding	89818179	89871319	54.79
ENSG00000168421	7746.65	0.275447	0.20334	6.67673	0.035495	0.560902	ENST00000505618	RHOH	4	399	uc021xnp.2	RHOH	protein_coding	40191053	40246967	42.71
ENSG00000124172	3766.72	-0.168729	0.170254	6.67647	0.0354996	0.560902	ENST00000243997	ATP5E	20	514	uc002yal.3	ATP5E	protein_coding	59025467	59032382	39.46
ENSG00000279058	25.3922	1.01301	1.59697	6.67406	0.0355424	NA	ENST00000624701		10	NA		AC244230.1	protein_coding	46337224	46358714	40.5
ENSG00000163945	1539.41	0.141506	0.324577	6.67161	0.0355859	0.560902	ENST00000511216	UVSSA	4	57654	uc003gde.4	UVSSA	protein_coding	1347266	1388049	59.09
ENSG00000143384	21093.2	-0.0101068	0.0944713	6.67065	0.0356031	0.560902	ENST00000369026	MCL1	1	4170	uc001euz.3	MCL1	protein_coding	150574551	150579738	44.74
ENSG00000198520	1448.55	0.198747	0.371233	6.66637	0.0356793	0.560902	ENST00000424484	C1orf228	1	339541		C1orf228	protein_coding	44674692	44725591	47.54
ENSG00000197858	3037.39	-0.347549	0.208288	6.66573	0.0356908	0.560902	ENST00000529503	GPAA1	8	8733		GPAA1	protein_coding	144082590	144086216	64.3
ENSG00000130382	1948.43	0.418285	0.195828	6.66248	0.0357488	0.560902	ENST00000585588	MLLT1	19	4298		MLLT1	protein_coding	6210379	6279948	55.57
ENSG00000177879	1296.11	0.17389	0.288994	6.66065	0.0357814	0.560902	ENST00000316788	AP3S1	5	1176	uc003krl.3	AP3S1	protein_coding	115841481	115914081	36.62
ENSG00000243716	1432.47	0.446803	0.257139	6.6559	0.0358665	0.560902	ENST00000415654	NPIPB5	16	100132247		NPIPB5	protein_coding	22479121	22536521	43.89
ENSG00000163681	2464.52	-0.653323	0.265685	6.65167	0.0359425	0.560902	ENST00000481846	SLMAP	3	7871		SLMAP	protein_coding	57755450	57929168	38.95
ENSG00000121764	9.94602	5.55668	2.331	6.65123	0.0359504	NA	ENST00000485464	HCRTR1	1	3061		HCRTR1	protein_coding	31617686	31632518	54.7
ENSG00000140057	8.1537	3.4641	2.50322	6.64934	0.0359845	NA	ENST00000267584	AK7	14	122481	uc001yfn.3	AK7	protein_coding	96392111	96489427	44.18
ENSG00000124721	195.001	1.18459	1.21609	6.64885	0.0359932	NA	ENST00000327475	DNAH8	6	1769	uc021yzh.1	DNAH8	protein_coding	38715341	39030529	39.11
ENSG00000277030	842.145	-1.15413	0.569739	6.64757	0.0360162	NA	ENST00000616772	MIR8071-2	14	102465871	uc032bmz.1	MIR8071-2	miRNA	105640168	105640232	64.62
ENSG00000135999	2974.66	0.152471	0.21232	6.64511	0.0360606	0.560902	ENST00000457184	EPC2	2	26122		EPC2	protein_coding	148644440	148787568	37.09
ENSG00000060237	8317.11	-0.226322	0.153389	6.64165	0.0361231	0.560902	ENST00000535572	WNK1	12	65125	uc001qip.4	WNK1	protein_coding	752593	911452	38.72
ENSG00000213846	330.485	-1.05674	0.806562	6.63666	0.0362133	NA	ENST00000368528		3	NA		AC098614.2	processed_pseudogene	27632976	27633720	52.21
ENSG00000177685	1267.79	-0.629677	0.451838	6.63628	0.0362202	0.560902	ENST00000528315	CRACR2B	11	283229	uc010qwt.3	CRACR2B	protein_coding	826144	831991	66.16
ENSG00000137642	5144.25	-0.233186	0.237113	6.6345	0.0362523	0.560902	ENST00000260197	SORL1	11	6653	uc001pxx.3	SORL1	protein_coding	121452203	121633693	43.56
ENSG00000099994	17.6773	3.66207	2.17127	6.62995	0.0363349	NA	ENST00000358321	SUSD2	22	56241	uc002zzn.1	SUSD2	protein_coding	24181259	24189110	64.31
ENSG00000185627	3745.26	-0.130834	0.203101	6.62796	0.036371	0.560902	ENST00000532097	PSMD13	11	5719	uc001lol.2	PSMD13	protein_coding	236546	252984	44.35
ENSG00000148337	4830.32	-0.180122	0.147419	6.62743	0.0363808	0.560902	ENST00000471773	CIZ1	9	25792		CIZ1	protein_coding	128166064	128204383	52.19
ENSG00000211772	5551.2	0.159303	0.152743	6.62196	0.0364805	0.560902	ENST00000466254	TRBC2	7	NA		TRBC2	TR_C_gene	142670777	142802748	43.18
ENSG00000162843	3.58957	1.74044	2.50555	6.6203	0.0365107	NA	ENST00000461971	WDR64	1	128025		WDR64	protein_coding	241652278	241802133	38.51
ENSG00000198945	2817.39	0.231912	0.217413	6.61642	0.0365817	0.560902	ENST00000529410	L3MBTL3	6	84456	uc003qbt.3	L3MBTL3	protein_coding	130013699	130141451	38.41
ENSG00000124126	10866.6	-0.194196	0.144814	6.61595	0.0365903	0.560902	ENST00000482556	PREX1	20	57580	uc002xtv.1	PREX1	protein_coding	48624252	48827883	50.46
ENSG00000234062	91.5857	0.265491	1.48159	6.61447	0.0366172	NA	ENST00000424306		X	NA	uc004fai.1	RP11-308D16.2	transcribed_unprocessed_pseudogene	136909395	137021630	42.06
ENSG00000197694	12523.9	-0.0528376	0.119957	6.61255	0.0366524	0.560902	ENST00000372731	SPTAN1	9	6709	uc004bvl.4	SPTAN1	protein_coding	128552558	128633662	46.82
ENSG00000008735	31.6798	-6.16174	2.30654	6.61118	0.0366776	NA	ENST00000329492	MAPK8IP2	22	23542	uc032qrw.1	MAPK8IP2	protein_coding	50600685	50613981	63.07
ENSG00000128294	1167.26	-0.0421249	0.282394	6.60851	0.0367265	0.560902	ENST00000338754	TPST2	22	8459	uc003acx.3	TPST2	protein_coding	26521983	26596717	48.48
ENSG00000147457	10398.2	-0.0529883	0.142546	6.605	0.036791	0.560902	ENST00000397677	CHMP7	8	91782	uc003xdc.2	CHMP7	protein_coding	23243637	23262000	46.73
ENSG00000229638	7758.45	-0.146962	0.116848	6.59767	0.0369262	0.560902	ENST00000422486	RPL4P4	3	NA		RPL4P4	processed_pseudogene	185417495	185418778	48.29
ENSG00000259515	25.7177	-5.53265	1.89997	6.59419	0.0369904	NA	ENST00000560931		14	NA		RP11-365N19.2	antisense	102933574	102937177	47.31
ENSG00000135956	2865.33	0.161474	0.235775	6.58533	0.0371547	0.560902	ENST00000258439	TMEM127	2	55654	uc002svq.3	TMEM127	protein_coding	96248516	96265994	51.14
ENSG00000115825	5602.87	-0.0176907	0.181571	6.58295	0.037199	0.560902	ENST00000379066	PRKD3	2	23683	uc002rqd.3	PRKD3	protein_coding	37250502	37324808	36.9
ENSG00000131507	1877.31	-0.598743	0.2455	6.58191	0.0372183	0.560902	ENST00000253814	NDFIP1	5	80762	uc003lmi.4	NDFIP1	protein_coding	142108505	142154443	39.29
ENSG00000114784	2274.51	-0.0489476	0.238227	6.57927	0.0372674	0.560902	ENST00000232905	EIF1B	3	10289	uc003ckc.4	EIF1B	protein_coding	40309684	40312424	41.77
ENSG00000081019	2516.72	0.0569613	0.23537	6.57394	0.0373668	0.560902	ENST00000261441	RSBN1	1	54665	uc001edq.3	RSBN1	protein_coding	113761832	113812476	37.22
ENSG00000160282	25.3056	8.27008	2.62426	6.57344	0.0373763	NA	ENST00000483568	FTCD	21	10841	uc002zie.3	FTCD	protein_coding	46136262	46155567	58.97
ENSG00000136813	2675.97	0.340882	0.262905	6.56592	0.037517	0.560902	ENST00000338205	KIAA0368	9	23392	uc004bfe.1	KIAA0368	protein_coding	111360692	111484745	39.33
ENSG00000237840	82.8729	-0.448064	1.30909	6.56458	0.0375421	NA	ENST00000426241	FAM21FP	10	NA		FAM21FP	transcribed_unprocessed_pseudogene	45706431	45727231	43.45
ENSG00000185404	6115.67	-0.312009	0.159601	6.56298	0.0375722	0.560902	ENST00000444636	SP140L	2	93349	uc010fxm.1	SP140L	protein_coding	230327184	230403732	38.73
ENSG00000134982	2313.44	0.142534	0.217978	6.5607	0.0376151	0.560902	ENST00000509732	APC	5	324		APC	protein_coding	112707498	112846239	37.63
ENSG00000168710	3041.04	-0.432448	0.171544	6.55894	0.0376482	0.560902	ENST00000369799	AHCYL1	1	10768	uc001dyx.3	AHCYL1	protein_coding	109984686	110023741	40.97
ENSG00000261794	51.1342	-4.21429	1.86424	6.55237	0.0377722	NA	ENST00000566740	GOLGA8H	15	728498	uc032byf.1	GOLGA8H	protein_coding	30604126	30614561	53.12
ENSG00000091317	5056.33	-0.121414	0.184083	6.55133	0.0377918	0.560902	ENST00000205636	CMTM6	3	54918	uc003cfa.1	CMTM6	protein_coding	32481312	32503408	38.68
ENSG00000213925	15.0423	8.11243	3.40962	6.54765	0.0378613	NA	ENST00000438918	NPM1P33	2	NA		NPM1P33	processed_pseudogene	203772631	203773502	41.4
ENSG00000110090	1576.97	0.12981	0.39903	6.54279	0.0379535	0.560902	ENST00000540367	CPT1A	11	1374	uc001oof.4	CPT1A	protein_coding	68754620	68844410	50.04
ENSG00000265972	110787	-0.36986	0.143256	6.53982	0.0380099	0.560902	ENST00000582401	TXNIP	1	10628	uc031utr.1	TXNIP	protein_coding	145992435	145996600	42.49
ENSG00000184677	5740.9	-0.0323889	0.17258	6.53854	0.0380343	0.560902	ENST00000400239	ZBTB40	1	9923		ZBTB40	protein_coding	22451851	22531157	42.7
ENSG00000115486	1203.5	0.426393	0.313821	6.53804	0.0380438	0.560902	ENST00000233838	GGCX	2	2677	uc002sps.3	GGCX	protein_coding	85544723	85561547	46.19
ENSG00000204264	6119.48	0.297737	0.204617	6.53332	0.0381335	0.560902	ENST00000490613	PSMB8	6	5696		PSMB8	protein_coding	32840717	32844703	50.56
ENSG00000141367	4391.7	0.426226	0.209403	6.52757	0.0382435	0.560902	ENST00000393043	CLTC	17	1213	uc002ixp.3	CLTC	protein_coding	59619689	59696956	38.54
ENSG00000108389	4713.41	-0.134144	0.130946	6.52737	0.0382472	0.560902	ENST00000579925	MTMR4	17	9110	uc002iwj.2	MTMR4	protein_coding	58489529	58517905	47.85
ENSG00000115423	31.29	1.62941	1.60102	6.52665	0.0382609	NA	ENST00000476689	DNAH6	2	1768		DNAH6	protein_coding	84516455	84819589	38.37
ENSG00000087589	50.707	-7.35178	2.21067	6.52038	0.038381	NA	ENST00000360314	CASS4	20	57091	uc002xxp.2	CASS4	protein_coding	56412112	56460387	45.22
ENSG00000166226	4249.37	0.247514	0.198357	6.51687	0.0384486	0.562599	ENST00000299300	CCT2	12	10576	uc001svb.1	CCT2	protein_coding	69585334	69601570	39.53
ENSG00000175567	19545.5	-0.040623	0.100002	6.51072	0.038567	0.563078	ENST00000310473	UCP2	11	7351	uc001oup.1	UCP2	protein_coding	73974667	73983307	53.18
ENSG00000091483	1149.42	-0.224553	0.205185	6.50076	0.0387595	0.564635	ENST00000366560	FH	1	2271	uc001hyx.3	FH	protein_coding	241497603	241519761	36.87
ENSG00000154227	3.93289	5.3876	2.30623	6.4962	0.038848	NA	ENST00000284382	CERS3	15	204219	uc002bwb.3	CERS3	protein_coding	100400395	100544995	40.8
ENSG00000269890	39.3914	2.51627	1.757	6.49222	0.0389254	NA	ENST00000602517		1	NA		RP5-1139B12.2	antisense	228270443	228274397	54.18
ENSG00000053372	1299.8	-0.274814	0.321835	6.48693	0.0390285	0.567295	ENST00000330263	MRTO4	1	51154	uc001bbs.3	MRTO4	protein_coding	19251539	19260128	53.49
ENSG00000155561	3207.56	-0.16952	0.287591	6.47555	0.0392511	0.569004	ENST00000285968	NUP205	7	23165	uc003vsw.3	NUP205	protein_coding	135557919	135648757	38.99
ENSG00000154258	8.09329	-1.29267	2.95436	6.46057	0.0395462	NA	ENST00000340001	ABCA9	17	10350	uc002jhu.3	ABCA9	protein_coding	68974488	69061064	37.68
ENSG00000171206	1864.23	-0.499577	0.204162	6.45968	0.0395639	0.569004	ENST00000302424	TRIM8	10	81603	uc001kvz.2	TRIM8	protein_coding	102644496	102658407	57.48
ENSG00000279016	19.3023	-6.35853	3.48438	6.45858	0.0395856	NA	ENST00000623546		4	NA		RP11-360A10.1	TEC	148819351	148819956	33.5
ENSG00000152601	18849	0.213466	0.0914802	6.45805	0.039596	0.569004	ENST00000477171	MBNL1	3	4154		MBNL1	protein_coding	152243828	152465780	35.71
ENSG00000111530	3302.93	0.0500826	0.183597	6.45745	0.0396081	0.569004	ENST00000545606	CAND1	12	55832	uc001stn.2	CAND1	protein_coding	67269281	67319951	36.92
ENSG00000213719	8890.74	-0.413569	0.186462	6.45465	0.0396635	0.569004	ENST00000375784	CLIC1	6	1192	uc003nwr.3	CLIC1	protein_coding	31730581	31739763	51
ENSG00000080546	1956.06	-0.738026	0.50923	6.45454	0.0396657	0.569004	ENST00000436639	SESN1	6	27244	uc003psu.3	SESN1	protein_coding	108986437	109094819	37.66
ENSG00000001629	2457.99	0.422312	0.284883	6.44865	0.0397827	0.569438	ENST00000265742	ANKIB1	7	54467	uc003ulw.2	ANKIB1	protein_coding	92246234	92401384	36.77
ENSG00000133597	1183.78	0.551741	0.532382	6.44189	0.0399174	0.569558	ENST00000072869	ADCK2	7	90956	uc003vvy.1	ADCK2	protein_coding	140673153	140696261	50.51
ENSG00000132128	1575.38	0.74191	0.305289	6.43953	0.0399644	0.569558	ENST00000496156	LRRC41	1	10489		LRRC41	protein_coding	46261196	46303608	47.41
ENSG00000125676	5415.06	-0.00746902	0.158732	6.43273	0.0401005	0.57026	ENST00000448128	THOC2	X	57187	uc004etw.1	THOC2	protein_coding	123600561	123733056	38.09
ENSG00000228057	65.3019	1.74606	0.749872	6.42997	0.0401559	NA	ENST00000425785	SEC63P1	1	NA		SEC63P1	processed_pseudogene	97545701	97546958	41.18
ENSG00000011260	1535.84	-0.288432	0.26401	6.42734	0.0402088	0.570279	ENST00000225298	UTP18	17	51096	uc002its.3	UTP18	protein_coding	51260528	51297936	40.38
ENSG00000073711	84.4132	-0.28596	1.97335	6.42593	0.0402371	NA	ENST00000264977	PPP2R3A	3	5523	uc003eqv.2	PPP2R3A	protein_coding	135965673	136147891	39.07
ENSG00000128203	469.051	1.64133	0.775816	6.42406	0.0402749	NA	ENST00000215906	ASPHD2	22	57168	uc003acg.2	ASPHD2	protein_coding	26429273	26445015	49.48
ENSG00000205726	16.5503	-5.36715	1.71582	6.41791	0.0403988	NA	ENST00000399353	ITSN1	21	6453	uc002ysx.3	ITSN1	protein_coding	33642400	33899861	42.47
ENSG00000106397	1088.7	-0.496542	0.247342	6.4163	0.0404314	0.570279	ENST00000454310	PLOD3	7	8985		PLOD3	protein_coding	101205977	101218420	58.5
ENSG00000167962	2306.43	-0.3508	0.231698	6.41585	0.0404404	0.570279	ENST00000562988	ZNF598	16	90850		ZNF598	protein_coding	1997654	2009823	64.25
ENSG00000115165	3441.5	0.192875	0.168416	6.41542	0.040449	0.570279	ENST00000264192	CYTIP	2	9595	uc002tzj.1	CYTIP	protein_coding	157414619	157488961	37.75
ENSG00000175886	660.673	0.313226	0.435855	6.41387	0.0404806	NA	ENST00000588490	RPL7AP66	18	NA		RPL7AP66	processed_pseudogene	39334872	39335672	53.31
ENSG00000272886	1969.82	0.543009	0.26009	6.40598	0.0406406	0.571753	ENST00000610213	DCP1A	3	55802	uc032rob.1	DCP1A	protein_coding	53283428	53347610	41.19
ENSG00000235238	214.934	1.4179	0.735728	6.40371	0.0406868	NA	ENST00000445436	SUMO2P1	6	NA		SUMO2P1	processed_pseudogene	29636060	29636343	45.42
ENSG00000258525	243.227	0.170575	0.920957	6.39465	0.0408714	NA	ENST00000555108		14	100506071	uc001wqs.3	RP11-829H16.3	antisense	30876179	30889808	39.27
ENSG00000135968	5689.59	0.412087	0.171076	6.38703	0.0410273	0.573893	ENST00000309863	GCC2	2	9648	uc002tec.3	GCC2	protein_coding	108448561	108509415	38.51
ENSG00000184368	53.9211	1.69613	2.06389	6.38701	0.0410278	NA	ENST00000379651	MAP7D2	X	256714	uc004czr.2	MAP7D2	protein_coding	20006713	20116917	44.44
ENSG00000184307	2309.98	0.0673886	0.270283	6.38239	0.0411226	0.573893	ENST00000330212	ZDHHC23	3	254887	uc003eau.3	ZDHHC23	protein_coding	113947901	113965401	43.72
ENSG00000198502	11779.6	0.846756	0.466782	6.38226	0.0411254	0.573893	ENST00000374975	HLA-DRB5	6	3127	uc003obj.3	HLA-DRB5	protein_coding	32517343	32530287	42.84
ENSG00000215193	2359.4	0.119843	0.240137	6.37841	0.0412047	0.573893	ENST00000329627	PEX26	22	55670	uc002znp.4	PEX26	protein_coding	18077920	18131138	48.63
ENSG00000137959	1498.19	0.544403	0.349205	6.3772	0.0412295	0.573893	ENST00000452835	IFI44L	1	10964		IFI44L	protein_coding	78619922	78646145	34.5
ENSG00000108509	2374.79	0.0595768	0.268715	6.37243	0.0413281	0.57405	ENST00000574951	CAMTA2	17	23125	uc002gah.2	CAMTA2	protein_coding	4967992	4987652	53.99
ENSG00000135090	4067.77	0.382021	0.168021	6.3628	0.0415274	0.575601	ENST00000419821	TAOK3	12	51347	uc001twx.3	TAOK3	protein_coding	118149801	118372945	39.71
ENSG00000160752	1722.68	-0.336884	0.249775	6.35786	0.0416301	0.57581	ENST00000468479	FDPS	1	2224		FDPS	protein_coding	155308748	155320666	50.48
ENSG00000270264	11.8732	-7.24744	2.96333	6.35053	0.041783	NA	ENST00000605113	NDUFB8P2	17	NA		NDUFB8P2	processed_pseudogene	59885015	59885552	53.9
ENSG00000170638	3913.48	0.374278	0.152325	6.34661	0.041865	0.577181	ENST00000380909	TRABD	22	80305	uc003bjs.1	TRABD	protein_coding	50185915	50199598	62.8
ENSG00000115241	3538.79	-0.315512	0.161229	6.3447	0.0419049	0.577181	ENST00000344034	PPM1G	2	5496	uc002rkl.4	PPM1G	protein_coding	27381194	27409687	45.48
ENSG00000153936	1589.1	0.0825207	0.165234	6.34014	0.0420007	0.577291	ENST00000370551	HS2ST1	1	9653	uc001dmc.4	HS2ST1	protein_coding	86914648	87109998	36.82
ENSG00000260060	58.9836	4.38225	2.80272	6.33545	0.0420993	NA	ENST00000565152		16	NA		RP11-388M20.1	antisense	31196131	31196963	50.06
ENSG00000162804	1292.27	-0.283552	0.334937	6.33436	0.0421223	0.577349	ENST00000401884	SNED1	2	25992	uc002wah.1	SNED1	protein_coding	240998838	241095568	50.8
ENSG00000133835	3345.92	-0.468923	0.247342	6.33158	0.0421807	0.577349	ENST00000256216	HSD17B4	5	3295	uc003ksj.3	HSD17B4	protein_coding	119452443	119637199	37.34
ENSG00000174672	33.1038	0.300492	1.42743	6.3236	0.0423495	NA	ENST00000308219	BRSK2	11	9024	uc001ltj.4	BRSK2	protein_coding	1389899	1462689	63.85
ENSG00000242574	31841.9	0.282121	0.114725	6.32259	0.0423708	0.578725	ENST00000487996	HLA-DMB	6	3109	uc003ock.2	HLA-DMB	protein_coding	32934629	32941070	45.17
ENSG00000091136	39.5214	0.995766	1.5606	6.32001	0.0424256	NA	ENST00000472714	LAMB1	7	3912		LAMB1	protein_coding	107923799	108003255	42.42
ENSG00000133316	2275.15	-0.297396	0.184627	6.3185	0.0424575	0.578725	ENST00000536401	WDR74	11	54663		WDR74	protein_coding	62832342	62841809	51.65
ENSG00000138623	1021.56	-0.771249	0.407136	6.30569	0.0427304	0.580471	ENST00000261918	SEMA7A	15	8482	uc002axv.3	SEMA7A	protein_coding	74409289	74434467	57.93
ENSG00000164934	1210.99	-0.231319	0.34227	6.30398	0.0427669	0.580471	ENST00000297579	DCAF13	8	25879	uc003yln.3	DCAF13	protein_coding	103414714	103443453	37.09
ENSG00000279252	30.6108	2.15345	1.02042	6.30252	0.0427983	NA	ENST00000623733		4	NA		AC092670.1	pseudogene	118459923	118460328	49.51
ENSG00000110330	2403.8	0.280379	0.210488	6.30007	0.0428506	0.580471	ENST00000527808	BIRC2	11	329		BIRC2	protein_coding	102347211	102378670	38.86
ENSG00000275910	76.9035	-7.53715	2.26443	6.29859	0.0428824	NA	ENST00000617759		16	NA		RP11-680G24.6	antisense	15015828	15016390	39.96
ENSG00000122863	20.6701	0.546676	3.47746	6.29546	0.0429496	NA	ENST00000373115	CHST3	10	9469	uc001jsn.3	CHST3	protein_coding	71964365	72013564	51.39
ENSG00000068697	2820.63	-0.10345	0.246445	6.29532	0.0429525	0.580654	ENST00000483117	LAPTM4A	2	9741		LAPTM4A	protein_coding	20032650	20052028	41.61
ENSG00000138593	4441.96	0.435896	0.177343	6.28897	0.043089	0.581304	ENST00000561428	SECISBP2L	15	9728		SECISBP2L	protein_coding	48988476	49046563	36.79
ENSG00000172053	7375.34	0.208699	0.134758	6.28305	0.0432169	0.581835	ENST00000482248	QARS	3	5859		QARS	protein_coding	49095932	49105101	53.41
ENSG00000240409	18.2823	-0.754046	0.389802	6.28016	0.0432793	NA	ENST00000467115	MTATP8P1	1	NA		MTATP8P1	unprocessed_pseudogene	633535	633741	38.16
ENSG00000182397	30.0311	0.553452	1.842	6.2789	0.0433067	NA	ENST00000341853	DNM1P46	15	196968	uc032csc.1	DNM1P46	transcribed_unprocessed_pseudogene	99790156	99806927	49.14
ENSG00000185101	4366.43	-0.0520236	0.155934	6.27737	0.0433398	0.582295	ENST00000526142	ANO9	11	338440		ANO9	protein_coding	417933	442011	59.43
ENSG00000237118	53.6216	2.32261	2.38014	6.269	0.0435215	NA	ENST00000437853	CYP2F2P	19	NA		CYP2F2P	unitary_pseudogene	40818721	40826772	52.65
ENSG00000154928	6.27224	-5.54809	2.10726	6.2575	0.0437725	NA	ENST00000467013	EPHB1	3	2047		EPHB1	protein_coding	134597801	135260467	44.84
ENSG00000168610	5816.35	-0.178347	0.0826616	6.24629	0.0440185	0.589037	ENST00000264657	STAT3	17	6774	uc002hzl.1	STAT3	protein_coding	42313324	42388568	45.02
ENSG00000133858	7287.13	-0.23893	0.136849	6.24495	0.0440481	0.589037	ENST00000378743	ZFC3H1	12	196441	uc001swo.3	ZFC3H1	protein_coding	71609472	71667725	36.14
ENSG00000172183	7903.52	-0.354517	0.203334	6.24098	0.0441354	0.589037	ENST00000560741	ISG20	15	3669	uc002bmv.1	ISG20	protein_coding	88636153	88656483	52.19
ENSG00000271856	4733.51	-0.255903	0.184374	6.2357	0.0442523	0.589037	ENST00000607746	LINC01215	3	101929623	uc032rwv.1	LINC01215	lincRNA	108125821	108138610	40.38
ENSG00000173064	7625.54	0.0521908	0.18122	6.2333	0.0443053	0.589037	ENST00000377560	HECTD4	12	283450	uc021reb.1	HECTD4	protein_coding	112160188	112382439	43.29
ENSG00000184612	20.4516	1.27266	1.99015	6.23079	0.044361	NA	ENST00000333817	RPL7P26	6	NA		RPL7P26	processed_pseudogene	17530899	17531652	42.84
ENSG00000105698	8583.83	-0.0474101	0.135833	6.22996	0.0443795	0.589037	ENST00000343550	USF2	19	7392	uc002nyr.1	USF2	protein_coding	35268978	35279821	57.36
ENSG00000198883	26.7737	-7.37214	2.28432	6.22914	0.0443977	NA	ENST00000361887	PNMA5	X	114824	uc010ntx.3	PNMA5	protein_coding	152988824	152994127	56.94
ENSG00000261064	34.1431	0.87944	1.70163	6.22843	0.0444134	NA	ENST00000564670		15	NA		RP11-1000B6.3	lincRNA	32536047	32587613	39.03
ENSG00000135519	55.7559	4.7159	1.99817	6.21648	0.0446795	NA	ENST00000257981	KCNH3	12	23416	uc001ruh.1	KCNH3	protein_coding	49539157	49558308	57.61
ENSG00000108932	48.9029	-3.14219	2.19283	6.21315	0.0447541	NA	ENST00000327268	SLC16A6	17	9120	uc002jha.2	SLC16A6	protein_coding	68267026	68291267	44.06
ENSG00000167978	62598.8	-0.0302613	0.0937799	6.21103	0.0448014	0.592559	ENST00000630499	SRRM2	16	23524	uc010bsu.1	SRRM2	protein_coding	2752329	2772538	52.86
ENSG00000130307	43.7711	-7.7283	2.23111	6.20791	0.0448713	NA	ENST00000252597	USHBP1	19	83878	uc002nfs.1	USHBP1	protein_coding	17249176	17282786	53.45
ENSG00000178951	2846.93	-0.242707	0.226764	6.20463	0.0449451	0.592559	ENST00000322357	ZBTB7A	19	51341	uc002lzi.3	ZBTB7A	protein_coding	4044364	4066945	62.12
ENSG00000165632	1850.16	0.11717	0.334037	6.20404	0.0449582	0.592559	ENST00000344293	TAF3	10	83860	uc010qbd.3	TAF3	protein_coding	7818504	8016627	39.51
ENSG00000213260	9.25447	1.53777	1.07197	6.20052	0.0450376	NA	ENST00000419975	YWHAZP5	10	NA		YWHAZP5	processed_pseudogene	105686322	105687051	42.33
ENSG00000140575	14820.1	-0.102087	0.122859	6.19833	0.0450869	0.592559	ENST00000268182	IQGAP1	15	8826	uc002bpl.1	IQGAP1	protein_coding	90388218	90502243	40.77
ENSG00000197081	4041.13	-0.281372	0.17156	6.19656	0.0451267	0.592559	ENST00000356956	IGF2R	6	3482	uc003qta.3	IGF2R	protein_coding	159969099	160113507	45.55
ENSG00000105793	1354.77	-0.311316	0.29196	6.19251	0.0452182	0.592559	ENST00000469675	GTPBP10	7	85865		GTPBP10	protein_coding	90335223	90391455	38.02
ENSG00000250948	59.3192	-2.91247	1.84492	6.18773	0.0453264	NA	ENST00000511322		17	NA		RP11-1079K10.2	antisense	49375380	49380094	47.49
ENSG00000196367	5438.46	-0.0924107	0.176254	6.1867	0.0453498	0.592559	ENST00000417523	TRRAP	7	8295		TRRAP	protein_coding	98877933	99013243	46.21
ENSG00000204852	2787.97	0.175552	0.304893	6.17967	0.0455096	0.592559	ENST00000550703	TCTN1	12	79600	uc010syb.2	TCTN1	protein_coding	110614027	110649430	44.42
ENSG00000126759	65.9431	1.16328	1.94975	6.17678	0.0455752	NA	ENST00000478222	CFP	X	5199		CFP	protein_coding	47624213	47630305	55.47
ENSG00000181222	9873.77	0.101204	0.117949	6.17609	0.045591	0.592559	ENST00000617998	POLR2A	17	5430	uc032eso.1	POLR2A	protein_coding	7484366	7514618	49.69
ENSG00000187323	3.351	4.01829	1.86168	6.17347	0.0456508	NA	ENST00000442544	DCC	18	1630	uc002lfe.2	DCC	protein_coding	52340172	53535903	37.02
ENSG00000108946	5424.14	-0.15462	0.153581	6.173	0.0456614	0.592559	ENST00000589017	PRKAR1A	17	5573	uc002jhg.4	PRKAR1A	protein_coding	68511780	68551319	41.97
ENSG00000146410	39.259	0.0807978	1.78616	6.17163	0.0456928	NA	ENST00000451457	MTFR2	6	113115	uc003qgt.1	MTFR2	protein_coding	136231024	136250335	39.81
ENSG00000187764	4582.54	-0.18524	0.1492	6.16913	0.0457499	0.592559	ENST00000339861	SEMA4D	9	10507	uc011ltm.1	SEMA4D	protein_coding	89360787	89498130	51.34
ENSG00000091542	3228.5	0.126262	0.203507	6.16284	0.0458941	0.592559	ENST00000541285	ALKBH5	17	54890		ALKBH5	protein_coding	18183078	18209954	50.24
ENSG00000101421	4818.32	0.314695	0.14589	6.16164	0.0459215	0.592559	ENST00000217402	CHMP4B	20	128866	uc002xaa.3	CHMP4B	protein_coding	33811304	33854366	46.43
ENSG00000125630	1321.27	-0.643349	0.304335	6.16026	0.0459533	0.592559	ENST00000263331	POLR1B	2	84172	uc002thw.3	POLR1B	protein_coding	112541915	112577150	42.17
ENSG00000182687	75.9948	0.123391	1.9917	6.15824	0.0459997	NA	ENST00000329003	GALR2	17	8811	uc002jqm.2	GALR2	protein_coding	76074794	76077541	64.59
ENSG00000178445	130.945	-0.931181	1.75363	6.15673	0.0460344	NA	ENST00000321612	GLDC	9	2731	uc003zkc.3	GLDC	protein_coding	6532464	6645650	44.28
ENSG00000137074	549.069	-0.370906	0.720089	6.15612	0.0460485	NA	ENST00000379825	APTX	9	54840	uc003zrv.3	APTX	protein_coding	32972606	33025168	42.68
ENSG00000174165	1602.01	-0.139991	0.223068	6.15573	0.0460575	0.592559	ENST00000534073	ZDHHC24	11	254359	uc009yrg.2	ZDHHC24	protein_coding	66520637	66546238	52.31
ENSG00000116459	3488.54	-0.341439	0.195216	6.15441	0.0460879	0.592559	ENST00000493119	ATP5F1	1	515		ATP5F1	protein_coding	111448864	111462773	39.38
ENSG00000132874	17.4376	-4.47375	2.62304	6.15423	0.0460921	NA	ENST00000586448	SLC14A2	18	8170	uc010dnj.3	SLC14A2	protein_coding	45212995	45683686	42.88
ENSG00000197928	677.425	0.0836935	0.814029	6.14764	0.0462441	NA	ENST00000598513	ZNF677	19	342926	uc002qbg.1	ZNF677	protein_coding	53235381	53254898	38.84
ENSG00000183624	3362.08	0.342739	0.257233	6.14325	0.0463457	0.593385	ENST00000509042	HMCES	3	56941	uc003elt.3	HMCES	protein_coding	129278828	129306186	44.53
ENSG00000119760	2533.45	0.336915	0.235896	6.14078	0.0464031	0.593385	ENST00000337768	SUPT7L	2	9913	uc002rli.2	SUPT7L	protein_coding	27650812	27663840	41.29
ENSG00000213862	819.801	-0.574061	0.359753	6.13843	0.0464576	NA	ENST00000497325		15	NA		CTD-2270N23.1	processed_pseudogene	47730144	47730935	53.66
ENSG00000160953	2288.3	0.184767	0.221952	6.13673	0.0464971	0.593385	ENST00000592374	MUM1	19	84939		MUM1	protein_coding	1285893	1378431	56.36
ENSG00000003249	955.655	-0.0780829	0.517324	6.13471	0.046544	0.593385	ENST00000304733	DBNDD1	16	79007	uc002fqe.2	DBNDD1	protein_coding	90004865	90020128	59.39
ENSG00000143344	47.843	-9.32869	2.35218	6.13348	0.0465727	NA	ENST00000304685	RGL1	1	23179	uc001gqm.3	RGL1	protein_coding	183636085	183928531	39.98
ENSG00000253910	16.1737	-7.14716	2.67859	6.13276	0.0465895	NA	ENST00000622527	PCDHGB2	5	56103	uc011dar.2	PCDHGB2	protein_coding	141360042	141512979	45.22
ENSG00000011523	1184.61	0.444577	0.318194	6.13215	0.0466037	0.593385	ENST00000475851	CEP68	2	23177		CEP68	protein_coding	65056366	65087004	47.81
ENSG00000279846	11.0935	7.67302	3.40988	6.12664	0.0467323	NA	ENST00000623238		15	NA		RP11-20G13.4	TEC	99497812	99498375	42.73
ENSG00000266402	18.756	-1.99727	1.89139	6.12506	0.0467692	NA	ENST00000580828		17	NA		RP11-329L6.2	lincRNA	64145970	64146476	63.71
ENSG00000013573	2961.86	-0.617224	0.259715	6.1223	0.0468337	0.59516	ENST00000542838	DDX11	12	1663	uc001rjr.1	DDX11	protein_coding	31073845	31104791	52.28
ENSG00000188687	57.3384	-1.49269	2.02102	6.12049	0.0468763	NA	ENST00000483195	SLC4A5	2	57835	uc002skl.3	SLC4A5	protein_coding	74216242	74343414	45.71
ENSG00000006025	2553.76	-0.264273	0.249178	6.11818	0.0469303	0.595235	ENST00000007414	OSBPL7	17	114881	uc002ilx.1	OSBPL7	protein_coding	47807372	47821834	57.86
ENSG00000233276	2944.31	0.16529	0.199555	6.11409	0.0470265	0.595307	ENST00000419783	GPX1	3	2876	uc021wxw.1	GPX1	protein_coding	49357176	49358600	63.79
ENSG00000271447	11.6375	-16.3622	3.24153	6.11092	0.047101	NA	ENST00000615317	MMP28	17	79148		MMP28	protein_coding	35756249	35795707	49.57
ENSG00000111912	1209.63	0.102231	0.487421	6.10223	0.047306	0.597694	ENST00000368357	NCOA7	6	135112	uc003qae.4	NCOA7	protein_coding	125781161	125932030	39.05
ENSG00000170681	16.8006	14.1142	3.48438	6.09764	0.0474148	NA	ENST00000307584	MURC	9	347273	uc004bba.4	MURC	protein_coding	100578079	100587906	40.73
ENSG00000230076	11.3131	0.0892357	1.06766	6.09491	0.0474795	NA	ENST00000457497		2	NA		AC016708.2	processed_pseudogene	214847128	214847445	55.35
ENSG00000186642	35.8821	-2.05582	1.5908	6.09484	0.0474812	NA	ENST00000334456	PDE2A	11	5138	uc010rrc.2	PDE2A	protein_coding	72576141	72674591	55.35
ENSG00000152942	2036.33	-0.346214	0.244467	6.08893	0.0476218	0.600529	ENST00000514066	RAD17	5	5884		RAD17	protein_coding	69369293	69414801	39.7
ENSG00000158985	9558.59	-0.00884747	0.108389	6.08277	0.0477686	0.601129	ENST00000503291	CDC42SE2	5	56990	uc003kvi.3	CDC42SE2	protein_coding	131245493	131398447	39.71
ENSG00000112309	82.9925	1.14755	1.08815	6.07976	0.0478405	NA	ENST00000230053	B3GAT2	6	135152	uc003pfv.3	B3GAT2	protein_coding	70856679	70957038	39.89
ENSG00000183615	21.646	8.68887	2.6994	6.07694	0.0479082	NA	ENST00000373582	FAM167B	1	84734	uc001buw.3	FAM167B	protein_coding	32247233	32248856	60.28
ENSG00000186918	5527.92	0.139722	0.119459	6.07125	0.0480446	0.601129	ENST00000344423	ZNF395	8	55893	uc003xgr.3	ZNF395	protein_coding	28345585	28402701	48.07
ENSG00000100221	2868.36	0.0859978	0.216122	6.06992	0.0480766	0.601129	ENST00000216039	JOSD1	22	9929	uc003awf.3	JOSD1	protein_coding	38685543	38701556	47.81
ENSG00000186162	292.626	-1.60613	1.25593	6.06485	0.0481985	NA	ENST00000432401	CIDECP	3	NA	uc003bus.3	CIDECP	transcribed_unprocessed_pseudogene	10014238	10026365	47.2
ENSG00000143321	4342.94	0.033068	0.18211	6.06446	0.048208	0.601129	ENST00000357325	HDGF	1	3068	uc001fpy.4	HDGF	protein_coding	156742107	156766925	51.35
ENSG00000111679	32055.2	-0.139054	0.0934394	6.06408	0.0482173	0.601129	ENST00000543115	PTPN6	12	5777		PTPN6	protein_coding	6946468	6961316	57.71
ENSG00000205837	14.9153	-1.9886	3.48438	6.06253	0.0482546	NA	ENST00000412528	LINC00487	2	400941		LINC00487	lincRNA	6728177	6770311	41.84
ENSG00000245937	983.294	-0.386538	0.286406	6.06072	0.0482983	0.601129	ENST00000499346	LINC01184	5	644873	uc003kuo.3	LINC01184	lincRNA	127940426	128083172	37.74
ENSG00000226002	52.7778	-3.93289	2.30076	6.05885	0.0483435	NA	ENST00000441415		7	NA		RP11-460N20.5	unprocessed_pseudogene	65084103	65100232	42.99
ENSG00000185947	1212.6	-0.3667	0.267558	6.05878	0.048345	0.601129	ENST00000300870	ZNF267	16	10308	uc002ecs.5	ZNF267	protein_coding	31873758	31917357	38.82
ENSG00000225554	6.13602	-0.0611553	3.48438	6.05773	0.0483706	NA	ENST00000444330		1	NA		RP11-527D7.1	lincRNA	241424292	241433492	42
ENSG00000263069	72.0655	0.12749	1.06609	6.05752	0.0483756	NA	ENST00000575034		17	100294362		CTD-2047H16.4	antisense	80351828	80415168	48.14
ENSG00000140968	27850.8	0.0403507	0.0895346	6.05645	0.0484014	0.601129	ENST00000268638	IRF8	16	3394	uc002fjh.3	IRF8	protein_coding	85898803	85922609	50.02
ENSG00000267776	9.32728	7.41669	3.23492	6.05382	0.0484651	NA	ENST00000591836		19	NA		AC006116.24	sense_intronic	56376704	56377284	36.66
ENSG00000211668	2261.17	-0.708539	0.452573	6.05186	0.0485127	0.601374	ENST00000390314	IGLV2-11	22	NA		IGLV2-11	IG_V_gene	22792491	22793007	58.03
ENSG00000270972	10.4927	7.59268	3.40994	6.04971	0.048565	NA	ENST00000605240		11	NA		RP11-326C3.15	lincRNA	333192	333688	48.69
ENSG00000233254	11.7567	-5.16502	1.75228	6.04351	0.0487156	NA	ENST00000453468	RPL21P134	X	NA		RPL21P134	processed_pseudogene	75384346	75384828	41.82
ENSG00000105662	2413.79	-0.135838	0.230708	6.04174	0.0487589	0.603288	ENST00000321949	CRTC1	19	23373	uc002nkb.4	CRTC1	protein_coding	18683677	18782333	56.04
ENSG00000138794	284.086	0.176725	0.972944	6.03848	0.0488384	NA	ENST00000352981	CASP6	4	839	uc003hzo.1	CASP6	protein_coding	109688622	109703583	44.61
ENSG00000166444	49.0322	2.76794	1.24553	6.03846	0.0488388	NA	ENST00000526757	ST5	11	6764	uc001mgu.3	ST5	protein_coding	8693351	8910951	45.03
ENSG00000163576	17.8232	-8.29816	2.63863	6.03609	0.0488966	NA	ENST00000295824	EFHB	3	151651	uc003cbl.4	EFHB	protein_coding	19879472	19947025	40.39
ENSG00000197549	392.016	-1.81297	0.774991	6.03366	0.0489562	NA	ENST00000419303	PRAMENP	22	NA	uc002zvu.3	PRAMENP	transcribed_unprocessed_pseudogene	21991099	22043934	44.64
ENSG00000187510	211.916	-1.23219	1.24095	6.03244	0.0489859	NA	ENST00000549856	PLEKHG7	12	440107		PLEKHG7	protein_coding	92721505	92772455	39.94
ENSG00000055917	8698.75	0.145484	0.164643	6.03078	0.0490267	0.604756	ENST00000338086	PUM2	2	23369	uc002rdt.1	PUM2	protein_coding	20248691	20352234	37.42
ENSG00000172432	3526.22	0.208889	0.322361	6.02936	0.0490616	0.604756	ENST00000496137	GTPBP2	6	54676		GTPBP2	protein_coding	43605316	43629162	46.56
ENSG00000260018	21.6291	-8.52739	2.90546	6.02646	0.0491327	NA	ENST00000565382		16	NA		RP11-505K9.1	antisense	84117051	84117571	65.64
ENSG00000112561	4895.37	-0.230008	0.157622	6.02206	0.0492409	0.605829	ENST00000406563	TFEB	6	7942	uc003oqr.2	TFEB	protein_coding	41683978	41736259	54.14
ENSG00000279670	70.8377	-0.191444	2.0667	6.01968	0.0492997	NA	ENST00000624779		9	NA		RP11-70L8.5	TEC	21892188	21893857	34.91
ENSG00000131944	129.369	1.15817	1.35478	6.01456	0.049426	NA	ENST00000254262	C19orf40	19	91442	uc002nud.4	C19orf40	protein_coding	32972209	32978222	49.22
ENSG00000226423	14.4245	-1.46055	3.48438	6.01102	0.0495135	NA	ENST00000412193		2	NA		AC093642.4	lincRNA	242025183	242026176	45.88
ENSG00000273723	58.9033	-9.87199	2.52062	6.01098	0.0495144	NA	ENST00000620372		13	NA		RP11-93H24.3	lincRNA	52651305	52652279	38.77
ENSG00000152582	25.1728	2.7817	1.95817	6.01002	0.0495384	NA	ENST00000282469	SPEF2	5	79925	uc003jjn.1	SPEF2	protein_coding	35617844	35814611	37.81
ENSG00000140678	2180.49	-0.598845	0.409384	6.00905	0.0495623	0.608644	ENST00000564308	ITGAX	16	3687		ITGAX	protein_coding	31355134	31382997	52.2
ENSG00000066923	765.013	-1.16327	0.529837	6.00724	0.0496071	NA	ENST00000426455	STAG3	7	10734	uc032zyz.1	STAG3	protein_coding	100177563	100221488	47.11
ENSG00000237846	123.173	-0.885557	1.37621	6.00253	0.0497242	NA	ENST00000414297		9	NA		RP11-216M21.1	processed_pseudogene	40105822	40106527	63.46
ENSG00000268222	16.8896	-5.61762	2.02279	5.99544	0.0499006	NA	ENST00000596811	EEF1A1P7	19	NA		EEF1A1P7	processed_pseudogene	35382172	35384052	45.03

## Sheet: Supplementary table 9
Supplementary table 9. Differentially expressed genes (485) at false discovery rate of 5% between JIA patients with uveitis 1 and JIA patients with uveitis 2
Ensemble Gene ID	baseMean	log2FoldChange	lfcSE	stat	pvalue	padj	ensembl_transcript_id	hgnc_symbol	chromosome_name	entrezgene	ucsc	external_gene_name	gene_biotype	start_position	end_position	percentage_gc_content
ENSG00000118523	75.4088	23.5107	2.09456	11.2246	3.08639e-29	5.89222e-25	ENST00000367976	CTGF	6	1490	uc003qcz.3	CTGF	protein_coding	131948176	131951373	52.28
ENSG00000169255	53.4996	21.9531	2.40283	9.13634	6.45996e-20	6.16636e-16	ENST00000320474	B3GALNT1	3	8706	uc003fdy.3	B3GALNT1	protein_coding	161083883	161105384	40.28
ENSG00000184368	53.9211	22.989	2.57876	8.91474	4.88949e-19	3.11151e-15	ENST00000379651	MAP7D2	X	256714	uc004czr.2	MAP7D2	protein_coding	20006713	20116917	44.44
ENSG00000279670	70.8377	22.5042	2.58261	8.71372	2.94063e-18	1.40349e-14	ENST00000624779		9	NA		RP11-70L8.5	TEC	21892188	21893857	34.91
ENSG00000119703	33.7466	22.2983	2.62623	8.49059	2.05599e-17	7.82697e-14	ENST00000534151	ZC2HC1C	14	79696		ZC2HC1C	protein_coding	75064170	75079987	44.26
ENSG00000279464	42.7323	21.8769	2.58295	8.46972	2.45989e-17	7.82697e-14	ENST00000623308		4	NA		RP11-17P16.1	TEC	67607856	67610313	37.63
ENSG00000211445	41.387	24.5264	2.93255	8.3635	6.08844e-17	1.66049e-13	ENST00000388825	GPX3	5	2878	uc021yga.1	GPX3	protein_coding	151020438	151028993	53.03
ENSG00000172731	108.66	-26.4903	3.20368	-8.26873	1.35393e-16	3.23099e-13	ENST00000355790	LRRC20	10	55222	uc001jqx.2	LRRC20	protein_coding	70298970	70382650	49.41
ENSG00000167807	52.3771	-24.3884	2.97191	-8.20631	2.28095e-16	4.8384e-13	ENST00000452032		19	NA		CTD-2369P2.10	protein_coding	10305427	10316009	53.85
ENSG00000141294	61.9748	21.438	2.64459	8.10636	5.2157e-16	9.35018e-13	ENST00000269025	LRRC46	17	90506	uc002ima.3	LRRC46	protein_coding	47831627	47837713	52.77
ENSG00000248932	56.6124	21.7599	2.6856	8.10242	5.38746e-16	9.35018e-13	ENST00000504670		3	100507291		RP11-319G6.1	antisense	139389815	139583319	42.28
ENSG00000278601	91.7886	22.7601	2.8302	8.04186	8.84873e-16	1.40776e-12	ENST00000619110		10	NA		RP11-348N5.9	antisense	110907483	110908182	32.86
ENSG00000141447	72.4068	22.5706	2.81112	8.02906	9.82209e-16	1.44241e-12	ENST00000319481	OSBPL1A	18	114876	uc002kve.4	OSBPL1A	protein_coding	24162044	24397880	40.87
ENSG00000154262	23.7839	-24.3991	3.05178	-7.99501	1.2956e-15	1.76674e-12	ENST00000284425	ABCA6	17	23460	uc002jhw.1	ABCA6	protein_coding	69078702	69141888	36.3
ENSG00000246889	42.2411	21.8225	2.74472	7.95071	1.85453e-15	2.36032e-12	ENST00000530690		11	NA		AP000487.5	antisense	70372246	70398488	46.87
ENSG00000108641	49.2278	-24.6278	3.10927	-7.92075	2.36078e-15	2.81685e-12	ENST00000575403	B9D1	17	27077	uc010cqm.1	B9D1	protein_coding	19337554	19378182	51.57
ENSG00000185215	35.1316	22.5391	2.85633	7.89093	2.99951e-15	3.36845e-12	ENST00000559195	TNFAIP2	14	7127		TNFAIP2	protein_coding	103123442	103137439	61.2
ENSG00000129757	52.0573	22.1888	2.82088	7.86593	3.66359e-15	3.88565e-12	ENST00000380725	CDKN1C	11	1028	uc001lwu.4	CDKN1C	protein_coding	2883213	2885881	67.44
ENSG00000235613	61.8324	22.1026	2.8305	7.80873	5.77683e-15	5.80449e-12	ENST00000444067	NSRP1P1	1	NA		NSRP1P1	processed_pseudogene	77847110	77848802	41.35
ENSG00000278002	47.8797	22.1279	2.8637	7.72703	1.10082e-14	1.05079e-11	ENST00000618845		14	NA		RP11-596C23.2	lincRNA	49863072	49864379	43.81
ENSG00000280214	49.9203	21.71	2.81847	7.70277	1.33146e-14	1.21042e-11	ENST00000623147		16	NA		CTD-2012K14.5	TEC	67550815	67552935	49.93
ENSG00000278244	41.0884	21.5368	2.80342	7.68236	1.56188e-14	1.25847e-11	ENST00000615015		X	NA		CTA-38K21.3	unprocessed_pseudogene	119815164	119815307	47.92
ENSG00000166192	31.8214	22.4176	2.91828	7.68179	1.56879e-14	1.25847e-11	ENST00000542035	SENP8	15	123228	uc021spq.1	SENP8	protein_coding	72114258	72143688	40.36
ENSG00000154611	25.1801	21.1744	2.75809	7.6772	1.626e-14	1.25847e-11	ENST00000415576	PSMA8	18	143471	uc002kvp.3	PSMA8	protein_coding	26133852	26193355	37.99
ENSG00000276007	50.6803	21.8619	2.84827	7.67548	1.64799e-14	1.25847e-11	ENST00000612986		16	NA		RP11-358L22.3	sense_intronic	78123243	78124332	37.34
ENSG00000128482	31.5513	21.7837	2.85626	7.62664	2.4095e-14	1.70682e-11	ENST00000575165	RNF112	17	7732	uc010vyu.2	RNF112	protein_coding	19411125	19417276	60.03
ENSG00000227495	19.524	22.2781	2.92118	7.6264	2.41393e-14	1.70682e-11	ENST00000438266		17	102724009		AC109333.10	antisense	5019214	5020093	52.39
ENSG00000236723	50.6783	21.3312	2.80049	7.61693	2.59772e-14	1.76085e-11	ENST00000629810		1	NA		RP5-1024G6.2	antisense	53209783	53213775	47.26
ENSG00000235072	79.857	20.9039	2.74619	7.61198	2.69931e-14	1.76085e-11	ENST00000313031		2	NA		AC012074.2	lincRNA	25369136	25375845	53.34
ENSG00000275793	34.7731	21.6376	2.84376	7.60878	2.76704e-14	1.76085e-11	ENST00000619918	RIMBP3	22	85376	uc002zsd.4	RIMBP3	protein_coding	18605815	18611919	62.54
ENSG00000132016	9.76025	21.2313	2.83132	7.49874	6.44325e-14	3.968e-11	ENST00000588115	C19orf57	19	79173		C19orf57	protein_coding	13882348	13906452	52.62
ENSG00000168852	47.3971	21.2219	2.84255	7.46579	8.27997e-14	4.65073e-11	ENST00000458118	TPTE2P5	13	NA		TPTE2P5	transcribed_unprocessed_pseudogene	40822296	40921749	39.96
ENSG00000243926	75.3296	21.2474	2.84597	7.46579	8.28031e-14	4.65073e-11	ENST00000492937	TIPARP-AS1	3	NA		TIPARP-AS1	antisense	156671862	156674378	43.54
ENSG00000215241	15.0228	20.4653	2.74123	7.46575	8.28269e-14	4.65073e-11	ENST00000304751		12	101927905		RP11-266K4.9	lincRNA	8235415	8242564	52.88
ENSG00000260259	47.4741	21.5706	2.89583	7.44886	9.41537e-14	5.13568e-11	ENST00000567544		16	NA		RP11-368I7.4	lincRNA	89682620	89686569	52.25
ENSG00000183935	58.8766	21.7997	2.94695	7.39736	1.38915e-13	7.36673e-11	ENST00000624664	HTR7P1	12	93164	uc010shq.2	HTR7P1	transcribed_processed_pseudogene	13000420	13004830	51.58
ENSG00000211961	35.2084	21.5811	2.92314	7.38285	1.54932e-13	7.99408e-11	ENST00000390621	IGHV1-45	14	NA		IGHV1-45	IG_V_gene	106506996	106507491	54.44
ENSG00000233392	77.5366	23.0268	3.12209	7.37545	1.63796e-13	8.03339e-11	ENST00000418218		2	200772	uc002waf.3	AC104809.4	processed_transcript	240954617	240967451	62.94
ENSG00000186074	55.7988	23.1498	3.13887	7.37519	1.6411e-13	8.03339e-11	ENST00000326165	CD300LF	17	146722	uc002jlg.4	CD300LF	protein_coding	74694311	74712978	48.69
ENSG00000268798	38.3161	20.653	2.82202	7.31853	2.50703e-13	1.19654e-10	ENST00000594262		19	NA		CTB-25B13.5	lincRNA	1440839	1441938	57
ENSG00000225603	96.0477	22.887	3.14031	7.28815	3.14229e-13	1.43455e-10	ENST00000435000		1	NA		RP11-325P15.1	processed_pseudogene	147050817	147052481	50.45
ENSG00000228839	34.0321	22.3577	3.0692	7.28456	3.22731e-13	1.43455e-10	ENST00000440456	PIK3IP1-AS1	22	101929760		PIK3IP1-AS1	antisense	31292499	31338021	45.31
ENSG00000170677	47.2489	23.0881	3.16952	7.2844	3.23115e-13	1.43455e-10	ENST00000397942	SOCS6	18	9306	uc002lkr.1	SOCS6	protein_coding	70288901	70330200	39.2
ENSG00000239335	37.1921	22.1929	3.069	7.23133	4.783e-13	2.07528e-10	ENST00000510317	LLPH-AS1	12	103625681		LLPH-AS1	antisense	66130751	66134449	44.42
ENSG00000269161	25.1084	21.8442	3.06392	7.12949	1.00742e-12	4.27394e-10	ENST00000596192		19	NA		CTD-3131K8.3	antisense	17518330	17520565	47.81
ENSG00000225675	36.3037	22.0418	3.09525	7.12118	1.07005e-12	4.44095e-10	ENST00000445039		1	NA	uc001cvn.1	RP4-784A16.5	lincRNA	53328233	53336509	48.7
ENSG00000201772	38.1751	21.8678	3.07387	7.1141	1.12647e-12	4.57564e-10	ENST00000364902	SNORA5C	7	677796	uc003tmz.2	SNORA5C	snoRNA	45104906	45105042	59.12
ENSG00000267325	30.448	20.3171	2.86748	7.08535	1.38696e-12	5.51634e-10	ENST00000587320	LINC01415	18	NA	uc002lgd.1	LINC01415	lincRNA	55776727	55781721	43.02
ENSG00000274184	31.9179	21.7344	3.07579	7.06626	1.59163e-12	6.20118e-10	ENST00000618230		18	NA		RP11-158H5.8	lincRNA	35268218	35270238	37.61
ENSG00000254593	31.379	21.7198	3.0837	7.04342	1.87578e-12	6.97554e-10	ENST00000526217	OR7E126P	11	NA		OR7E126P	unprocessed_pseudogene	71903194	71904081	49.44
ENSG00000127903	49.3589	21.9368	3.115	7.04231	1.89073e-12	6.97554e-10	ENST00000537055	ZNF835	19	90485	uc010ygn.2	ZNF835	protein_coding	56661981	56671783	54.61
ENSG00000132259	19.4296	-21.9197	3.11288	-7.04163	1.9e-12	6.97554e-10	ENST00000533426	CNGA4	11	1262	uc010raa.2	CNGA4	protein_coding	6234765	6244429	48.79
ENSG00000235111	30.8789	22.0547	3.14011	7.02353	2.1633e-12	7.79235e-10	ENST00000420902		22	NA		RP1-29C18.8	sense_intronic	49612657	49615716	48.86
ENSG00000272791	35.1157	21.8711	3.13402	6.97861	2.98107e-12	1.05392e-09	ENST00000609434		10	NA		RP11-464F9.22	lincRNA	73630556	73631490	43.1
ENSG00000267264	45.2514	-22.4924	3.23162	-6.96009	3.40044e-12	1.18032e-09	ENST00000586818		19	NA		CTC-459F4.6	processed_pseudogene	27803538	27804060	43.98
ENSG00000254165	29.9434	21.4362	3.09585	6.92417	4.38542e-12	1.49504e-09	ENST00000522190		8	NA		RP11-503E24.2	antisense	42537529	42538304	31.96
ENSG00000264660	33.8945	-22.3685	3.23431	-6.91599	4.64598e-12	1.55608e-09	ENST00000581673		17	NA		RP11-381P6.1	antisense	20963722	20980238	44.81
ENSG00000243819	19.7351	21.5619	3.12697	6.89547	5.3687e-12	1.76713e-09	ENST00000607781	RN7SL832P	2	NA		RN7SL832P	lincRNA	10690344	10692099	45.27
ENSG00000197238	17.9986	21.6835	3.16609	6.84866	7.45443e-12	2.41208e-09	ENST00000355057	HIST1H4J	6	8362	uc003njp.3	HIST1H4J	protein_coding	27824108	27824480	62.2
ENSG00000263503	29.3088	22.0523	3.22995	6.82745	8.64387e-12	2.75033e-09	ENST00000580257		17	NA		RP11-707O23.5	processed_pseudogene	45600869	45602340	60.87
ENSG00000169885	28.8368	21.8469	3.20865	6.80875	9.8453e-12	3.08126e-09	ENST00000307786	CALML6	1	163688	uc001aih.1	CALML6	protein_coding	1914827	1917296	63.04
ENSG00000250012	34.7062	20.7148	3.06732	6.75341	1.44409e-11	4.44662e-09	ENST00000511301		3	NA		RP11-124N2.1	antisense	126084220	126095349	39.32
ENSG00000128886	187.183	8.03006	1.19379	6.72653	1.73759e-11	5.26545e-09	ENST00000319359	ELL3	15	80237	uc001zsw.1	ELL3	protein_coding	43772600	43777543	51.92
ENSG00000100290	34.5546	-22.2497	3.35695	-6.62794	3.404e-11	1.0154e-08	ENST00000216115	BIK	22	638	uc003bdk.3	BIK	protein_coding	43110748	43129712	54.8
ENSG00000257557	36.0431	-21.5873	3.26445	-6.61286	3.76976e-11	1.10721e-08	ENST00000552885		12	NA		RP11-84G21.1	antisense	79934901	79942712	39.77
ENSG00000272255	36.5181	22.2381	3.36742	6.60389	4.00519e-11	1.15853e-08	ENST00000606683		5	NA		CTD-3224K15.3	lincRNA	139644460	139645002	47.15
ENSG00000155760	26.9922	-24.3849	3.69629	-6.59713	4.19189e-11	1.19444e-08	ENST00000286201	FZD7	2	8324	uc002uyw.1	FZD7	protein_coding	202034587	202038445	52.76
ENSG00000261959	38.6309	22.2561	3.37698	6.59054	4.38241e-11	1.23036e-08	ENST00000572855		17	NA		RP11-893F2.14	antisense	50163523	50165316	53.01
ENSG00000269506	51.2968	-26.0144	3.95151	-6.58341	4.59766e-11	1.27209e-08	ENST00000595906		4	NA		RP11-571I18.5	antisense	54059597	54061210	31.78
ENSG00000277232	32.6848	-23.9424	3.64315	-6.5719	4.96766e-11	1.35482e-08	ENST00000623117	GTSE1-AS1	22	150384	uc003bhj.4	GTSE1-AS1	lincRNA	46295143	46296660	55.67
ENSG00000128242	14.8862	21.8511	3.32868	6.5645	5.22085e-11	1.39947e-08	ENST00000406955	GAL3ST1	22	9514	uc003aih.1	GAL3ST1	protein_coding	30554635	30574587	53.55
ENSG00000267117	57.2875	-25.4794	3.88236	-6.56288	5.27796e-11	1.39947e-08	ENST00000585559		19	NA		AC010525.4	antisense	55694118	55694558	56.46
ENSG00000230148	26.9167	19.4833	2.98845	6.51953	7.05286e-11	1.84447e-08	ENST00000504972	HOXB-AS1	17	100874362		HOXB-AS1	antisense	48543551	48551250	50.45
ENSG00000260145	38.3966	20.1718	3.10306	6.50061	7.99969e-11	2.05379e-08	ENST00000562970		16	NA		RP11-322D14.2	antisense	57052505	57058497	51.38
ENSG00000236942	23.4684	-23.8165	3.66446	-6.49932	8.06842e-11	2.05379e-08	ENST00000411645		1	NA		RP11-6B6.3	processed_pseudogene	205625483	205626153	50.97
ENSG00000256448	28.5769	20.762	3.19932	6.4895	8.61208e-11	2.16333e-08	ENST00000542598		11	NA		RP11-809N8.4	antisense	73405297	73410682	49.09
ENSG00000279108	28.0745	22.0642	3.40385	6.48214	9.04317e-11	2.24212e-08	ENST00000623128		19	NA	uc032hxu.1	CTC-490E21.11	TEC	40840159	40842039	40.94
ENSG00000230306	28.0539	-23.6835	3.65818	-6.47412	9.53674e-11	2.33418e-08	ENST00000430526	BANF1P2	10	NA		BANF1P2	processed_pseudogene	133344643	133344906	56.44
ENSG00000143590	24.6782	21.3057	3.29237	6.47122	9.72152e-11	2.34929e-08	ENST00000368408	EFNA3	1	1944	uc001fhf.3	EFNA3	protein_coding	155078872	155087538	63.23
ENSG00000240137	30.6257	22.0417	3.41395	6.45636	1.07249e-10	2.55936e-08	ENST00000471093	ERICH6-AS1	3	101928085		ERICH6-AS1	antisense	150703564	150720146	42.97
ENSG00000260693	27.7221	-24.7889	3.84614	-6.44512	1.15506e-10	2.72237e-08	ENST00000562992		15	NA		AC026150.8	lincRNA	30540093	30545969	39.95
ENSG00000261643	54.6714	-25.2136	3.92147	-6.42963	1.27916e-10	2.97811e-08	ENST00000564650		4	NA		RP11-529E10.6	sense_overlapping	3503597	3504457	52.26
ENSG00000134508	24.3087	20.7617	3.23764	6.41259	1.4307e-10	3.29078e-08	ENST00000400473	CABLES1	18	91768	uc031rhr.1	CABLES1	protein_coding	23134564	23260467	48.32
ENSG00000271347	26.1051	21.8436	3.42245	6.38244	1.74289e-10	3.96113e-08	ENST00000604451		15	NA		RP11-701H24.7	sense_intronic	24991486	24991753	26.49
ENSG00000281286	20.9028	21.6609	3.39604	6.37829	1.79077e-10	4.02206e-08	ENST00000625618		5	NA		AC008865.1	miRNA	97091175	97091303	44.19
ENSG00000164484	21.8168	22.0251	3.46021	6.36526	1.94961e-10	4.32791e-08	ENST00000296978	TMEM200A	6	114801	uc003qca.4	TMEM200A	protein_coding	130365734	130443063	38.16
ENSG00000163155	73.4746	20.8873	3.29397	6.34107	2.28172e-10	5.00693e-08	ENST00000368908	LYSMD1	1	388695	uc001ewy.3	LYSMD1	protein_coding	151159748	151165948	46.07
ENSG00000248256	23.4827	21.6749	3.42472	6.32894	2.46849e-10	5.35523e-08	ENST00000513576	OCIAD1-AS1	4	NA		OCIAD1-AS1	antisense	48852008	48860203	36.91
ENSG00000228554	41.8508	21.8267	3.45168	6.32352	2.55674e-10	5.48435e-08	ENST00000435766		7	NA		AC004837.5	antisense	39700341	39703296	39.41
ENSG00000260316	28.2867	21.6262	3.42363	6.31674	2.67132e-10	5.66647e-08	ENST00000564460		16	NA		LA16c-306A4.2	sense_intronic	898967	905224	60.9
ENSG00000271447	11.6375	-23.5998	3.74477	-6.30208	2.9368e-10	6.16116e-08	ENST00000615317	MMP28	17	79148		MMP28	protein_coding	35756249	35795707	49.57
ENSG00000228369	41.9392	-25.3631	4.03795	-6.28119	3.35991e-10	6.97219e-08	ENST00000428794	TXNDC12-AS1	1	104355143		TXNDC12-AS1	antisense	52050918	52052683	43.09
ENSG00000260625	34.6045	22.0568	3.51782	6.27002	3.6101e-10	7.4108e-08	ENST00000569782		16	NA		RP11-452L6.7	antisense	31508471	31509256	48.85
ENSG00000266964	31.1031	-23.4495	3.74132	-6.26771	3.66397e-10	7.41141e-08	ENST00000351325	FXYD1	19	5348	uc002nyc.4	FXYD1	protein_coding	35138808	35143109	61.09
ENSG00000254791	41.5734	-25.3012	4.03796	-6.26584	3.7083e-10	7.41141e-08	ENST00000525233	FAR1-IT1	11	NA		FAR1-IT1	sense_intronic	13669327	13670149	44.96
ENSG00000258454	36.7052	-25.2982	4.03798	-6.26506	3.72686e-10	7.41141e-08	ENST00000554225		14	NA		RP11-361H10.3	sense_overlapping	76235817	76263474	42.99
ENSG00000270137	39.1697	-25.2681	4.03797	-6.25762	3.90885e-10	7.69318e-08	ENST00000602328		8	NA		CTC-137K3.1	sense_intronic	132826179	132826903	36.55
ENSG00000225125	38.3933	-25.2331	4.03797	-6.24894	4.13246e-10	8.05029e-08	ENST00000413361	RANP4	X	NA		RANP4	processed_pseudogene	136807223	136807877	40.92
ENSG00000176358	20.0255	21.541	3.45613	6.23269	4.58505e-10	8.84174e-08	ENST00000352793	TAC4	17	255061	uc002ips.1	TAC4	protein_coding	49838309	49848017	50.87
ENSG00000224072	41.7652	-25.1174	4.038	-6.22025	4.96366e-10	9.47145e-08	ENST00000424779		X	NA		RP11-75A9.3	processed_pseudogene	46454097	46457199	40.57
ENSG00000104783	5307.36	-1.52791	0.245694	-6.21877	5.01082e-10	9.47145e-08	ENST00000600909	KCNN4	19	3783		KCNN4	protein_coding	43766533	43781257	55.16
ENSG00000279016	19.3023	-25.0968	4.03822	-6.21482	5.13824e-10	9.61706e-08	ENST00000623546		4	NA		RP11-360A10.1	TEC	148819351	148819956	33.5
ENSG00000253865	32.3093	-22.5938	3.64741	-6.19446	5.84836e-10	1.08399e-07	ENST00000521756		5	NA		RP11-394O4.3	antisense	149372174	149375116	49.03
ENSG00000273254	41.1541	-24.943	4.03804	-6.17702	6.53226e-10	1.19911e-07	ENST00000608809		21	NA		RP1-100J12.1	antisense	29024255	29024890	53.46
ENSG00000279866	18.707	21.4974	3.49044	6.15894	7.32342e-10	1.33154e-07	ENST00000624838		16	NA		CTB-193M12.4	TEC	15704410	15705984	50.1
ENSG00000197061	33.0479	20.845	3.38541	6.15731	7.39928e-10	1.33264e-07	ENST00000377803	HIST1H4C	6	8364	uc003ngi.3	HIST1H4C	protein_coding	26103876	26104310	49.66
ENSG00000253520	28.0255	-24.8095	4.03807	-6.14391	8.05121e-10	1.4365e-07	ENST00000521868		5	NA		RP11-798K23.5	processed_pseudogene	179527224	179527513	42.07
ENSG00000281332	16.7463	21.1732	3.45231	6.13306	8.62042e-10	1.52382e-07	ENST00000628855	LINC00997	7	NA	uc003tcz.2	LINC00997	lincRNA	32760279	32762924	47.54
ENSG00000211643	35.7992	20.897	3.41722	6.11521	9.64293e-10	1.68893e-07	ENST00000390289	IGLV5-52	22	NA		IGLV5-52	IG_V_gene	22318727	22319226	53
ENSG00000248794	27.4443	20.8468	3.41254	6.10886	1.00347e-09	1.73929e-07	ENST00000510537		5	NA		CTD-2248H3.1	processed_pseudogene	81242330	81242599	44.44
ENSG00000244063	29.0934	20.7971	3.40511	6.10762	1.01127e-09	1.73929e-07	ENST00000435407		2	NA		AC024704.2	lincRNA	113829390	113831119	43.7
ENSG00000245573	44.3346	21.0348	3.4514	6.09456	1.09741e-09	1.87059e-07	ENST00000530686	BDNF-AS	11	497258	uc001mrm.3	BDNF-AS	antisense	27506838	27698174	39.46
ENSG00000280417	26.1852	20.8923	3.43252	6.08657	1.15358e-09	1.94893e-07	ENST00000623443		3	NA		RP11-5O17.1	TEC	53046166	53048122	54.27
ENSG00000213277	24.2407	-24.5377	4.03814	-6.07648	1.22852e-09	2.05733e-07	ENST00000412473	MARCKSL1P1	10	NA		MARCKSL1P1	processed_pseudogene	103175554	103176094	57.12
ENSG00000231340	27.1011	20.8181	3.42793	6.07307	1.25484e-09	2.08315e-07	ENST00000428275	ACTG1P10	X	NA		ACTG1P10	processed_pseudogene	53142832	53143913	56.65
ENSG00000269843	28.2304	-22.0369	3.62959	-6.07145	1.26762e-09	2.08622e-07	ENST00000596135		19	NA		CTC-490E21.10	lincRNA	40831221	40837210	44.76
ENSG00000279539	17.9955	-23.0826	3.80504	-6.06631	1.30885e-09	2.13566e-07	ENST00000624246		19	NA		AC006486.10	TEC	42242775	42244973	54.66
ENSG00000200594	16.832	-23.14	3.8212	-6.05571	1.39802e-09	2.26182e-07	ENST00000363724	RNU6-824P	6	NA		RNU6-824P	snRNA	154825176	154825279	40.38
ENSG00000219355	23.636	21.2832	3.51905	6.04801	1.46647e-09	2.35263e-07	ENST00000407532	RPL31P52	12	NA		RPL31P52	processed_pseudogene	120450437	120450803	42.23
ENSG00000171659	24.0179	-24.3561	4.02816	-6.04646	1.4806e-09	2.35551e-07	ENST00000378142	GPR34	X	2857	uc004dfp.4	GPR34	protein_coding	41688973	41697277	38.35
ENSG00000270246	22.3279	-24.3903	4.03819	-6.03992	1.54194e-09	2.43282e-07	ENST00000604135		15	NA		RP11-701H24.8	sense_intronic	25041918	25042428	39.92
ENSG00000272644	23.748	-22.2056	3.68104	-6.03244	1.61505e-09	2.52729e-07	ENST00000607956		2	NA		RP11-33O4.1	lincRNA	219069354	219069809	44.96
ENSG00000188064	37.719	21.4047	3.5516	6.02678	1.67255e-09	2.59599e-07	ENST00000339464	WNT7B	22	7477	uc003bgo.3	WNT7B	protein_coding	45920362	45977129	60.2
ENSG00000174946	42.906	21.0777	3.49915	6.02365	1.70523e-09	2.62537e-07	ENST00000309180	GPR171	3	29909	uc003eyq.4	GPR171	protein_coding	151197832	151203201	36.82
ENSG00000206828	21.2981	20.9915	3.48633	6.02108	1.7326e-09	2.64616e-07	ENST00000384101		1	NA		U1	snRNA	149636766	149636929	45.12
ENSG00000280022	17.3474	21.2294	3.52662	6.01976	1.74671e-09	2.64654e-07	ENST00000625174		17	NA		RP11-707O23.1	TEC	45592621	45593369	31.91
ENSG00000267287	37.6792	22.7045	3.77709	6.01111	1.8426e-09	2.76986e-07	ENST00000586798		18	284240		RP11-567M16.1	processed_transcript	79576460	79589010	59.04
ENSG00000185792	28.4108	-22.4763	3.7401	-6.00955	1.86034e-09	2.77466e-07	ENST00000332836	NLRP9	19	338321	uc002qly.3	NLRP9	protein_coding	55708432	55738402	44.61
ENSG00000177710	25.2304	21.392	3.56668	5.99775	2.00073e-09	2.96092e-07	ENST00000382435	SLC35G5	8	83650	uc003wtp.1	SLC35G5	protein_coding	11330888	11332208	57.68
ENSG00000182013	22.351	-24.183	4.03821	-5.98856	2.11708e-09	3.10399e-07	ENST00000438932	PNMAL1	19	55228	uc002per.4	PNMAL1	protein_coding	46466491	46471563	52.55
ENSG00000255778	18.3391	-24.1795	4.03827	-5.98758	2.12992e-09	3.10399e-07	ENST00000536505		12	NA		RP4-765H13.1	lincRNA	126191378	126225314	40.54
ENSG00000243659	19.4533	20.844	3.48538	5.98042	2.22559e-09	3.21884e-07	ENST00000428741		1	NA		RP11-4K3__A.3	processed_pseudogene	27311240	27311838	45.74
ENSG00000164949	33.5066	-22.0001	3.6819	-5.97521	2.29796e-09	3.29852e-07	ENST00000396194	GEM	8	2669	uc003ygi.3	GEM	protein_coding	94249253	94262350	44.2
ENSG00000206941	20.5396	-24.0555	4.03832	-5.9568	2.57217e-09	3.66457e-07	ENST00000384214	SNORD15A	11	6079	uc001owj.1	SNORD15A	snoRNA	75400391	75400538	47.3
ENSG00000261732	17.0215	-24.0474	4.03832	-5.95479	2.60409e-09	3.67336e-07	ENST00000454337		16	NA		LA16c-431H6.6	protein_coding	1632259	1686715	53.15
ENSG00000128617	47.8299	22.3635	3.75605	5.95399	2.61682e-09	3.67336e-07	ENST00000249389	OPN1SW	7	611	uc003vnt.4	OPN1SW	protein_coding	128772491	128775790	48.61
ENSG00000254774	26.7717	-24.0311	4.03834	-5.95075	2.66917e-09	3.71949e-07	ENST00000527922		8	NA		RP11-148O21.3	antisense	11553224	11554207	56.5
ENSG00000148935	18.2342	-24.0106	4.03831	-5.9457	2.75286e-09	3.80833e-07	ENST00000528582	GAS2	11	2620	uc001mqo.3	GAS2	protein_coding	22625642	22813055	36.04
ENSG00000183246	15.437	-23.9956	4.03835	-5.94194	2.81668e-09	3.86858e-07	ENST00000331505	RIMBP3C	22	150221	uc002zuy.4	RIMBP3C	protein_coding	21545357	21551461	62.51
ENSG00000270445	26.7048	-23.9903	4.03835	-5.9406	2.83977e-09	3.87243e-07	ENST00000605712		12	NA		RP11-972P1.8	processed_pseudogene	123441517	123441852	42.56
ENSG00000241411	15.2089	-23.979	4.03836	-5.9378	2.88865e-09	3.91115e-07	ENST00000459634		4	NA		RP11-192C21.1	processed_pseudogene	134952259	134952889	56.74
ENSG00000226261	28.4642	20.5972	3.47068	5.93463	2.94501e-09	3.91791e-07	ENST00000405197		2	NA		AC064836.3	processed_pseudogene	202336024	202336727	60.23
ENSG00000205837	14.9153	-23.9651	4.03837	-5.93436	2.94993e-09	3.91791e-07	ENST00000412528	LINC00487	2	400941		LINC00487	lincRNA	6728177	6770311	41.84
ENSG00000273402	18.4821	20.6424	3.47862	5.93407	2.95521e-09	3.91791e-07	ENST00000610248		8	NA		RP5-855D21.2	antisense	237045	237669	27.52
ENSG00000226423	14.4245	-23.874	4.03839	-5.91176	3.38465e-09	4.4563e-07	ENST00000412193		2	NA		AC093642.4	lincRNA	242025183	242026176	45.88
ENSG00000253485	13.9963	-23.8542	4.03842	-5.90683	3.4875e-09	4.55764e-07	ENST00000611914	PCDHGA5	5	56110	uc011das.2	PCDHGA5	protein_coding	141364232	141512979	45.2
ENSG00000230753	21.8901	-23.8489	4.03822	-5.9058	3.50937e-09	4.55764e-07	ENST00000423074	ZNF341-AS1	20	101929746		ZNF341-AS1	antisense	33787373	33811097	47.84
ENSG00000257802	18.7141	20.8114	3.52942	5.89654	3.71204e-09	4.78828e-07	ENST00000550293		12	NA	uc010stu.2	RP11-2H8.4	processed_pseudogene	71849228	71850428	42.88
ENSG00000225039	52.8531	19.3246	3.28043	5.89086	3.84185e-09	4.92247e-07	ENST00000420694	LINC01058	13	NA		LINC01058	lincRNA	30419519	30422237	54.28
ENSG00000267221	23.161	-23.7831	4.03845	-5.88917	3.8813e-09	4.93987e-07	ENST00000587304		17	NA		CTD-2132N18.2	sense_intronic	42040713	42043117	53.97
ENSG00000235531	16.0109	21.1183	3.58759	5.88648	3.94511e-09	4.98498e-07	ENST00000521467		8	100132891		RP11-383H13.1	antisense	71828167	72118393	37.87
ENSG00000240589	20.2815	-23.7657	4.03846	-5.88484	3.98437e-09	4.98498e-07	ENST00000478664	RN7SL258P	17	NA	uc021tyd.1	RN7SL258P	misc_RNA	44409059	44409358	53.33
ENSG00000244050	26.2662	-23.7635	4.03839	-5.8844	3.99508e-09	4.98498e-07	ENST00000491870		12	NA		RP11-266K4.1	transcribed_unprocessed_pseudogene	8199599	8218911	38.46
ENSG00000279841	19.4457	22.076	3.7525	5.883	4.02893e-09	4.99457e-07	ENST00000624151		16	NA		RP11-274A11.4	TEC	81630193	81632038	52.38
ENSG00000251791	17.7517	-23.7506	4.03848	-5.88108	4.0759e-09	5.01024e-07	ENST00000515982	SCARNA6	2	677772	uc002vuf.1	SCARNA6	scaRNA	233288676	233288940	53.21
ENSG00000183153	14.2899	-23.7461	4.03848	-5.87997	4.10351e-09	5.01024e-07	ENST00000578689	GJD3	17	125111	uc010cwz.3	GJD3	protein_coding	40362931	40363815	73.79
ENSG00000267480	16.3077	-23.7434	4.03848	-5.87929	4.12031e-09	5.01024e-07	ENST00000587619		18	NA		RP11-703I16.1	antisense	12031178	12032181	46.22
ENSG00000254017	19.8209	-23.7308	4.03841	-5.87628	4.19584e-09	5.0698e-07	ENST00000519308	IGHEP2	9	NA		IGHEP2	IG_C_pseudogene	5113549	5114804	58.6
ENSG00000260167	14.5989	-23.7029	4.0385	-5.86924	4.37796e-09	5.25658e-07	ENST00000563540		16	NA		RP11-146F11.5	antisense	30585907	30608593	46.69
ENSG00000211623	15.8955	21.6006	3.68614	5.85994	4.63024e-09	5.52474e-07	ENST00000390268	IGKV2D-26	2	NA		IGKV2D-26	IG_V_gene	89985922	89986702	46.73
ENSG00000223823	34.8696	20.1288	3.44252	5.84712	5.00169e-09	5.93089e-07	ENST00000416774	LINC01342	1	254099	uc001acv.3	LINC01342	lincRNA	1137017	1144056	65
ENSG00000253047	34.3721	-20.5687	3.53062	-5.82581	5.68373e-09	6.69803e-07	ENST00000517238		1	NA		SNORA40	snoRNA	150600539	150600659	35.54
ENSG00000277218	17.0743	-23.5104	4.03858	-5.82145	5.83406e-09	6.83301e-07	ENST00000612008		10	NA		RP11-500G10.5	lincRNA	130104569	130104998	38.37
ENSG00000127074	21.9583	-23.4903	4.03863	-5.81641	6.0126e-09	6.99918e-07	ENST00000391995	RGS13	1	6003	uc001gsj.3	RGS13	protein_coding	192636138	192660306	35.72
ENSG00000200152	10.4942	-23.4827	4.03864	-5.81451	6.08116e-09	7.03608e-07	ENST00000363282	RNU6-216P	11	NA		RNU6-216P	snRNA	74968189	74968292	43.27
ENSG00000226334	30.7029	-23.4597	4.03856	-5.80893	6.28741e-09	7.2309e-07	ENST00000435915		9	NA		RP11-217B7.2	antisense	104927553	104928892	60.37
ENSG00000139187	20.3859	18.4551	3.1785	5.80624	6.38927e-09	7.30405e-07	ENST00000539240	KLRG1	12	10219	uc001qvg.3	KLRG1	protein_coding	8950044	9010760	39.18
ENSG00000183598	55.0931	-20.1923	3.47899	-5.80408	6.47187e-09	7.35444e-07	ENST00000331491	HIST2H3D	1	653604	uc010pbl.2	HIST2H3D	protein_coding	149813271	149813681	67.4
ENSG00000230943	15.6148	-23.388	4.0387	-5.79099	6.99744e-09	7.85935e-07	ENST00000427157		6	101927686		RP11-367G18.1	lincRNA	113623535	113650074	39.7
ENSG00000225439	22.9847	21.9309	3.78708	5.79096	6.99853e-09	7.85935e-07	ENST00000529783	BOLA3-AS1	2	100507171	uc002skf.3	BOLA3-AS1	antisense	74148009	74150061	49.2
ENSG00000224566	27.5018	-23.3414	4.03874	-5.77937	7.49791e-09	8.33372e-07	ENST00000414727	FAM96AP2	1	NA		FAM96AP2	processed_pseudogene	228114997	228115473	43.61
ENSG00000224934	46.5299	-23.3404	4.03873	-5.77914	7.50825e-09	8.33372e-07	ENST00000416191		10	NA		RP11-441O15.3	lincRNA	99431191	99438117	40.1
ENSG00000260988	10.1896	-23.3256	4.03875	-5.77543	7.67547e-09	8.47008e-07	ENST00000566715		15	NA		RP11-285A1.1	lincRNA	78141243	78143173	42.98
ENSG00000261019	9.42181	-23.3112	4.03875	-5.77189	7.83853e-09	8.60031e-07	ENST00000569883		7	NA		RP11-111K18.2	lincRNA	42901272	42902639	36.11
ENSG00000272160	10.5223	-23.3022	4.03871	-5.7697	7.94147e-09	8.66347e-07	ENST00000607255		10	NA		U4	snRNA	109869858	109869992	40.74
ENSG00000273240	41.6767	22.1074	3.84283	5.7529	8.77277e-09	9.51597e-07	ENST00000608680		2	NA		RP11-455J20.3	antisense	189763859	189764456	37.12
ENSG00000276445	14.4563	-23.1156	4.03892	-5.72322	1.04522e-08	1.12736e-06	ENST00000617916		19	NA		LLNLR-268E12.1	lincRNA	39812972	39813555	42.64
ENSG00000244071	16.0188	-23.0795	4.03896	-5.71422	1.10209e-08	1.18202e-06	ENST00000484311	RPL9P33	19	NA		RPL9P33	processed_pseudogene	51621136	51621701	39.93
ENSG00000166819	22.9715	19.9834	3.49978	5.70989	1.13047e-08	1.20218e-06	ENST00000300055	PLIN1	15	5346	uc002boh.3	PLIN1	protein_coding	89664365	89679427	52.04
ENSG00000226987	7.75081	-23.0603	4.03897	-5.70944	1.13348e-08	1.20218e-06	ENST00000446606		9	NA		RP11-544A12.5	processed_pseudogene	131240687	131241724	53.28
ENSG00000207109	7.67969	-23.0545	4.03898	-5.70799	1.14317e-08	1.20575e-06	ENST00000384381		3	NA		SNORD38	snoRNA	53333060	53333128	34.78
ENSG00000165572	160.114	9.35585	1.64064	5.70257	1.18017e-08	1.23794e-06	ENST00000379485	KBTBD6	13	89890	uc001uxu.1	KBTBD6	protein_coding	41127569	41132746	42.89
ENSG00000186047	7.54857	-23.0285	4.039	-5.70153	1.18736e-08	1.23868e-06	ENST00000443723	DLEU7	13	220107		DLEU7	protein_coding	50711008	50843939	40.02
ENSG00000271204	19.5632	21.8108	3.82749	5.69846	1.20897e-08	1.25437e-06	ENST00000605249		7	NA		RP11-138A9.1	lincRNA	130930209	130932206	39.14
ENSG00000213433	19.0373	-22.9705	4.03905	-5.68709	1.29226e-08	1.33354e-06	ENST00000518134	RPLP1P6	5	NA		RPLP1P6	transcribed_processed_pseudogene	151765859	151766378	50.58
ENSG00000222894	16.8129	-22.9339	4.03909	-5.67797	1.36299e-08	1.39897e-06	ENST00000410962		6	NA		AL662800.1	miRNA	30616229	30616305	58.44
ENSG00000095739	32.3068	-22.9207	4.03911	-5.67468	1.3895e-08	1.41855e-06	ENST00000375533	BAMBI	10	25805	uc001iuj.1	BAMBI	protein_coding	28677342	28682939	47.11
ENSG00000279699	35.6211	23.0171	4.0594	5.67007	1.42742e-08	1.44951e-06	ENST00000623328		22	NA		RP1-102K2.9	TEC	30275215	30276951	51.53
ENSG00000267275	9.49886	-22.8923	4.03913	-5.66765	1.44773e-08	1.46236e-06	ENST00000588799		19	NA		CTD-2562J15.6	antisense	16283359	16324514	50.42
ENSG00000206028	6.83951	-22.8718	4.03915	-5.66252	1.49167e-08	1.49222e-06	ENST00000382641		22	NA	uc003ade.1	CTA-373H7.7	lincRNA	26667693	26672654	52.86
ENSG00000237301	8.77517	-22.8712	4.03915	-5.66237	1.49292e-08	1.49222e-06	ENST00000428945		1	NA		RP4-680D5.2	antisense	15586136	15603626	46.61
ENSG00000280311	6.4965	-22.8307	4.03921	-5.65228	1.58332e-08	1.57433e-06	ENST00000623606		12	NA		RP13-554M15.5	TEC	132621999	132622973	61.64
ENSG00000248596	10.5184	-22.823	4.03921	-5.65036	1.60108e-08	1.58374e-06	ENST00000515403		5	NA	uc003mdn.3	RP11-844P9.2	lincRNA	176143085	176199295	46.34
ENSG00000279619	11.0175	-22.7685	4.03927	-5.63679	1.73253e-08	1.69672e-06	ENST00000624372		19	NA		CTD-2527I21.5	TEC	35137645	35139580	58.73
ENSG00000269535	20.2927	22.8828	4.05959	5.63673	1.73307e-08	1.69672e-06	ENST00000594379		19	NA	uc002pyw.1	CTD-2525I3.6	antisense	52300693	52345229	43.39
ENSG00000203546	21.8798	21.8168	3.8807	5.62186	1.88908e-08	1.84003e-06	ENST00000549185		14	NA		RP11-176H8.1	protein_coding	31334312	31457441	38.95
ENSG00000273174	17.0562	22.7621	4.05967	5.60688	2.06011e-08	1.99642e-06	ENST00000608909		3	NA		RP11-434H6.6	antisense	129123439	129124003	48.14
ENSG00000007516	4636.17	-1.88591	0.337512	-5.58767	2.30135e-08	2.21894e-06	ENST00000426824	BAIAP3	16	8938	uc010uuz.2	BAIAP3	protein_coding	1333601	1349441	65.72
ENSG00000271551	24.2376	21.4642	3.84555	5.58158	2.38344e-08	2.27931e-06	ENST00000603191		6	NA		RP11-230C9.2	lincRNA	156776360	156777077	41.09
ENSG00000164879	38.3368	18.2588	3.27145	5.58126	2.38784e-08	2.27931e-06	ENST00000520921	CA3	8	761		CA3	protein_coding	85373436	85449040	38.15
ENSG00000152154	28.5856	21.3893	3.83311	5.58015	2.40314e-08	2.2825e-06	ENST00000437068	TMEM178A	2	130733		TMEM178A	protein_coding	39664982	39717963	40.56
ENSG00000207034	26.0039	21.2812	3.8399	5.54211	2.98848e-08	2.82441e-06	ENST00000384307		18	NA		Y_RNA	misc_RNA	2778941	2779057	41.03
ENSG00000270576	15.8034	21.4286	3.87228	5.53386	3.13262e-08	2.94605e-06	ENST00000604337		14	NA		RP5-1021I20.7	processed_pseudogene	73840520	73840609	45.56
ENSG00000238288	13.3942	22.4024	4.05982	5.51809	3.42701e-08	3.20711e-06	ENST00000431980		9	NA		RP11-100G15.4	unprocessed_pseudogene	92110168	92110514	34.01
ENSG00000145331	115.553	9.26229	1.67952	5.51485	3.49074e-08	3.25082e-06	ENST00000394877	TRMT10A	4	93587	uc003hva.4	TRMT10A	protein_coding	99546709	99564032	35.04
ENSG00000264188	27.3879	22.3565	4.05955	5.50714	3.64707e-08	3.37991e-06	ENST00000584148		18	NA		RP11-13N13.5	sense_intronic	21661787	21662395	52.87
ENSG00000227370	28.5446	21.1263	3.83822	5.50419	3.70875e-08	3.42048e-06	ENST00000417586		22	NA		RP4-669P10.19	processed_pseudogene	42132543	42132998	60.31
ENSG00000263412	21.5087	21.1994	3.85468	5.49965	3.80553e-08	3.48808e-06	ENST00000578660		17	NA		RP5-890E16.2	processed_transcript	48045141	48048073	49.4
ENSG00000183154	51.9877	20.1725	3.66837	5.49904	3.8186e-08	3.48808e-06	ENST00000330539		8	102723701	uc003xkb.1	RP11-863K10.7	antisense	37734761	37737426	53
ENSG00000271857	29.047	22.2823	4.05956	5.48884	4.04588e-08	3.67809e-06	ENST00000606796		6	NA		RP1-244F24.1	antisense	45421079	45422005	49.95
ENSG00000236519	31.713	22.2617	4.05956	5.48378	4.16331e-08	3.75811e-06	ENST00000417820	LINC01424	21	NA	uc032qbs.1	LINC01424	antisense	44802577	44804717	45.59
ENSG00000200677	8.03982	-22.1469	4.03892	-5.48336	4.17328e-08	3.75811e-06	ENST00000363807		15	NA		SNORD18	snoRNA	90755243	90755312	40
ENSG00000272686	26.0872	22.2553	4.05958	5.48218	4.2011e-08	3.76541e-06	ENST00000607957		7	NA	uc003vla.3	RP11-390E23.6	antisense	123749068	123751166	41.64
ENSG00000171790	23.0989	22.2392	4.05959	5.47819	4.29701e-08	3.83338e-06	ENST00000302946	SLFNL1	1	200172	uc001cgm.2	SLFNL1	protein_coding	41015597	41023237	57.34
ENSG00000278919	23.1397	18.9859	3.46694	5.47628	4.34363e-08	3.85694e-06	ENST00000624434		11	NA		AP006285.2	protein_coding	1580492	1585989	54.95
ENSG00000225518	27.5623	22.2178	4.05958	5.47292	4.42682e-08	3.89921e-06	ENST00000602806		1	NA		RP11-396C23.2	lincRNA	226083639	226090292	49.38
ENSG00000216775	25.1944	21.0543	3.84714	5.47271	4.43209e-08	3.89921e-06	ENST00000602367		6	NA	uc003paw.3	RP1-152L7.5	transcribed_unprocessed_pseudogene	52665148	52669155	41.39
ENSG00000242853	12.4934	22.2025	4.05987	5.46877	4.53157e-08	3.96136e-06	ENST00000460421	RN7SL749P	10	NA		RN7SL749P	misc_RNA	119212857	119213146	55.86
ENSG00000258818	11.8686	22.2007	4.0599	5.46828	4.54422e-08	3.96136e-06	ENST00000555835	RNASE4	14	6038	uc001vxy.5	RNASE4	protein_coding	20684100	20701215	43.42
ENSG00000258885	34.5031	20.6948	3.78748	5.464	4.65528e-08	4.03973e-06	ENST00000557174		9	NA		RP11-344B23.2	antisense	36856555	36861375	51.13
ENSG00000245532	24793.1	-0.872503	0.15974	-5.46201	4.7077e-08	4.06673e-06	ENST00000499732	NEAT1	11	NA	uc010rog.2	NEAT1	lincRNA	65422774	65445540	44.06
ENSG00000225526	32.6448	21.2111	3.88583	5.45857	4.79972e-08	4.12754e-06	ENST00000567514	MKRN2OS	3	100129480		MKRN2OS	protein_coding	12514934	12561059	43.71
ENSG00000269720	20.8678	22.1389	4.05963	5.45343	4.94078e-08	4.2298e-06	ENST00000597169		19	NA		CTD-2521M24.5	lincRNA	17391429	17392284	52.1
ENSG00000229646	14.7369	-22.0215	4.04042	-5.45031	5.02819e-08	4.28541e-06	ENST00000414740		6	NA		RP11-330A16.1	lincRNA	14597514	14599690	40.93
ENSG00000259100	25.6835	20.999	3.85375	5.44898	5.06591e-08	4.29837e-06	ENST00000553667		14	NA		RP11-1074O12.1	processed_pseudogene	39385404	39387102	45.85
ENSG00000165383	16.7726	21.4011	3.93057	5.44478	5.187e-08	4.38164e-06	ENST00000374160	LRRC18	10	474354	uc001jhd.3	LRRC18	protein_coding	48909483	48935190	43.89
ENSG00000223343	21.9349	22.073	4.05964	5.43718	5.41298e-08	4.55239e-06	ENST00000452042		3	NA		RP13-131K19.2	antisense	48985049	48989988	51.32
ENSG00000119986	22.694	22.0434	4.05965	5.42989	5.63889e-08	4.72158e-06	ENST00000370626	AVPI1	10	60370	uc001koi.2	AVPI1	protein_coding	97677424	97687323	49.03
ENSG00000150907	6909.29	0.914072	0.168677	5.41907	5.99105e-08	4.99455e-06	ENST00000379561	FOXO1	13	2308	uc001uxl.4	FOXO1	protein_coding	40555667	40666597	41.99
ENSG00000196302	10.62	21.9604	4.05999	5.40896	6.33907e-08	5.26171e-06	ENST00000508439		5	NA	uc021yag.2	RP11-497H16.5	unprocessed_pseudogene	70516387	70555266	40.49
ENSG00000258794	7.19802	21.9462	4.0604	5.40493	6.48354e-08	5.35832e-06	ENST00000554796	DUX4L27	12	NA		DUX4L27	transcribed_processed_pseudogene	34208415	34209675	61.38
ENSG00000279078	24.9861	-21.8259	4.04041	-5.4019	6.5938e-08	5.42595e-06	ENST00000623342	SND1-IT1	7	27099	uc003vmj.3	SND1-IT1	lincRNA	127997597	128000077	43.69
ENSG00000226124	20.2327	21.1285	3.91292	5.39968	6.67609e-08	5.4701e-06	ENST00000416668	FTCDNL1	2	NA		FTCDNL1	protein_coding	199760544	199851173	40.08
ENSG00000255992	23.0373	21.0985	3.91066	5.39512	6.8476e-08	5.58665e-06	ENST00000539078		12	NA		RP11-417L19.4	lincRNA	131924736	131929351	58.6
ENSG00000246627	22.8623	20.7624	3.85285	5.38886	7.09067e-08	5.76034e-06	ENST00000501371	CACNA1C-AS1	12	100652846	uc001qkx.2	CACNA1C-AS1	antisense	2676001	2691200	54.44
ENSG00000253250	20.2262	21.8555	4.05968	5.38354	7.30335e-08	5.90797e-06	ENST00000517562	C8orf88	8	100127983	uc022axl.1	C8orf88	protein_coding	90958637	90985257	32.98
ENSG00000278896	19.7075	21.8277	4.05974	5.37663	7.58928e-08	6.11337e-06	ENST00000623851		12	NA		RP11-474P2.7	TEC	46404644	46407166	41.06
ENSG00000226822	18.4377	20.9509	3.89774	5.37513	7.65283e-08	6.13866e-06	ENST00000419428		1	NA		RP11-356N1.2	lincRNA	108071482	108074519	40.26
ENSG00000164483	12.6626	19.8104	3.68716	5.37279	7.7526e-08	6.19267e-06	ENST00000368134	SAMD3	6	154075	uc003qbx.4	SAMD3	protein_coding	130144315	130365425	39.15
ENSG00000228444	16.8381	21.8063	4.05975	5.37134	7.8152e-08	6.21667e-06	ENST00000422931		13	NA		RP11-173B14.4	sense_intronic	75631271	75632135	44.97
ENSG00000279396	6.87288	21.7636	4.06046	5.35987	8.32801e-08	6.5971e-06	ENST00000625112		19	NA		AC130469.1	TEC	8575079	8576170	53.21
ENSG00000251497	17.6304	21.7551	4.0597	5.35881	8.37729e-08	6.60871e-06	ENST00000506255		12	100507091	uc021rfs.1	RP11-197N18.7	lincRNA	123081384	123084744	53.26
ENSG00000254352	20.3033	21.7293	4.05977	5.35235	8.68183e-08	6.82077e-06	ENST00000520351		8	NA	uc031tbn.1	RP11-578O24.2	processed_pseudogene	78723796	78724136	45.45
ENSG00000237436	15.3271	21.7082	4.05981	5.34711	8.93721e-08	6.99263e-06	ENST00000442889		1	NA		RP11-312B8.1	antisense	6783892	6784843	59.77
ENSG00000251405	18.5112	20.9203	3.9144	5.34443	9.07007e-08	7.06762e-06	ENST00000519499		5	NA		CTB-109A12.1	sense_overlapping	157362615	157460078	42.39
ENSG00000258725	18.4714	21.6853	4.0598	5.34148	9.21884e-08	7.15434e-06	ENST00000556200	PRC1-AS1	15	100507118		PRC1-AS1	antisense	90966345	90988624	44.84
ENSG00000276417	14.0004	21.6253	4.05985	5.32663	1.00054e-07	7.73333e-06	ENST00000611627		12	NA		RP11-266K4.13	lincRNA	8205984	8207397	36.42
ENSG00000264878	20.336	20.7879	3.90342	5.32557	1.00636e-07	7.74697e-06	ENST00000583113		6	NA		Z85986.1	miRNA	36510517	36510598	64.63
ENSG00000196366	16.3864	21.6178	4.05984	5.3248	1.01064e-07	7.74866e-06	ENST00000624034	C9orf163	9	NA		C9orf163	lincRNA	136483495	136486067	63.62
ENSG00000248243	14.6036	21.6109	4.05985	5.32307	1.02029e-07	7.79133e-06	ENST00000514010		3	NA		RP11-93K22.13	lincRNA	130089433	130094304	50.43
ENSG00000243642	13.5193	21.5895	4.05987	5.31779	1.05034e-07	7.98885e-06	ENST00000469492	RN7SL526P	19	NA		RN7SL526P	misc_RNA	58069970	58070288	56.43
ENSG00000256712	13.0986	21.5758	4.05988	5.3144	1.07009e-07	8.10679e-06	ENST00000543969		12	NA		RP11-785H5.2	sense_intronic	11166090	11171353	41.28
ENSG00000264187	24.1823	21.5655	4.05984	5.31191	1.08482e-07	8.18587e-06	ENST00000427497		17	NA		RP11-45M22.4	protein_coding	17202649	17237185	53.5
ENSG00000257446	15.6911	21.4871	4.0599	5.29251	1.20648e-07	9.0681e-06	ENST00000547628	ZNF878	19	729747	uc021upl.1	ZNF878	protein_coding	12043805	12052939	46.11
ENSG00000272086	20.6034	20.5476	3.88323	5.29136	1.2141e-07	9.08957e-06	ENST00000606994		5	NA		CTD-2186M15.3	lincRNA	32174471	32175272	52.49
ENSG00000226744	28.3283	21.4593	4.0596	5.28607	1.24975e-07	9.31994e-06	ENST00000429197		7	NA		AC079781.5	processed_pseudogene	97870167	97870289	46.34
ENSG00000260541	11.5323	21.3725	4.06	5.26418	1.40819e-07	1.04606e-05	ENST00000570247		16	NA		LA16c-429E7.1	sense_overlapping	1841020	1843547	43.16
ENSG00000229585	24.8125	21.3607	4.05995	5.26132	1.43026e-07	1.05834e-05	ENST00000491826	RPL21P44	4	NA	uc011bzv.4	RPL21P44	processed_pseudogene	53986587	53987058	43.86
ENSG00000169684	6.44863	21.3437	4.06055	5.25637	1.4693e-07	1.08303e-05	ENST00000299565	CHRNA5	15	1138	uc002bdy.3	CHRNA5	protein_coding	78565520	78595269	40.43
ENSG00000203799	32.4195	19.5537	3.74673	5.21886	1.80023e-07	1.32186e-05	ENST00000615766	CCDC162P	6	221262		CCDC162P	unitary_pseudogene	109285485	109355063	44.64
ENSG00000232111	5.84801	21.1832	4.0607	5.21666	1.82183e-07	1.33259e-05	ENST00000416620		X	NA		RP11-126O22.1	processed_pseudogene	9402751	9414566	47.21
ENSG00000255652	5.31167	21.1342	4.06085	5.20438	1.94643e-07	1.4183e-05	ENST00000545923		12	NA		RP11-313F23.4	lincRNA	34191037	34218853	46.83
ENSG00000103335	8838.41	-0.741645	0.142981	-5.18702	2.13681e-07	1.55109e-05	ENST00000518793	PIEZO1	16	9780		PIEZO1	protein_coding	88715343	88785211	61.99
ENSG00000223697	13.2361	20.7656	4.006	5.18363	2.17613e-07	1.57365e-05	ENST00000429151		8	NA		AF230666.2	antisense	132838117	132844298	36.48
ENSG00000227598	17.1901	21.0391	4.06016	5.18184	2.19704e-07	1.58278e-05	ENST00000444102		6	NA		RP1-167A14.2	antisense	166969626	166999065	43.79
ENSG00000170962	13.9102	-17.3755	3.36063	-5.17033	2.33684e-07	1.67717e-05	ENST00000393158	PDGFD	11	80310	uc001phq.3	PDGFD	protein_coding	103907186	104164379	37.11
ENSG00000100721	23502.9	1.12024	0.217153	5.15877	2.48583e-07	1.77741e-05	ENST00000554012	TCL1A	14	8115	uc001yfc.4	TCL1A	protein_coding	95709967	95714196	50.31
ENSG00000227456	5.1386	20.9137	4.06091	5.15001	2.60477e-07	1.85551e-05	ENST00000630751	LINC00310	21	114036		LINC00310	lincRNA	34157724	34190244	43
ENSG00000205611	4.68962	20.8678	4.06108	5.13849	2.76957e-07	1.96557e-05	ENST00000380888		20	NA		RP4-610C12.4	lincRNA	30278906	30286537	53.22
ENSG00000240905	5.50137	20.8483	4.06079	5.13404	2.8359e-07	2.00519e-05	ENST00000468562	RN7SL798P	8	NA		RN7SL798P	misc_RNA	55980240	55980540	54.49
ENSG00000235172	4.61609	20.8335	4.06111	5.12999	2.89757e-07	2.04124e-05	ENST00000521471	LINC01366	5	NA	uc032vsu.1	LINC01366	lincRNA	170331429	170333879	49.53
ENSG00000240729	4.43514	20.8206	4.06119	5.12673	2.94824e-07	2.0693e-05	ENST00000460608		5	NA		CTD-2301A4.3	processed_pseudogene	177264766	177265241	42.23
ENSG00000259161	4.17345	20.7855	4.06132	5.11791	3.08946e-07	2.16047e-05	ENST00000553295		14	NA		CTD-2017C7.3	processed_pseudogene	101843394	101844122	42.94
ENSG00000277999	4.25607	20.7248	4.06128	5.10302	3.34271e-07	2.32648e-05	ENST00000622268		16	NA		RP11-426C22.8	lincRNA	29272220	29272772	53.35
ENSG00000084234	13578	1.05809	0.207365	5.10254	3.35123e-07	2.32648e-05	ENST00000532456	APLP2	11	334		APLP2	protein_coding	130069837	130144811	43.6
ENSG00000240211	14.8323	20.7079	4.06028	5.1001	3.39466e-07	2.3481e-05	ENST00000475250		7	NA		RP11-758P17.3	antisense	100436204	100438504	53.54
ENSG00000111537	7.34449	20.6827	4.06054	5.09358	3.51355e-07	2.42156e-05	ENST00000229135	IFNG	12	3458	uc001stw.1	IFNG	protein_coding	68154768	68159747	36.04
ENSG00000250686	12.0617	20.6446	4.06052	5.08423	3.69123e-07	2.53487e-05	ENST00000511849		6	NA		RP1-240B8.3	3prime_overlapping_ncrna	61630233	61681049	34.34
ENSG00000259802	7.38356	20.6293	4.06059	5.08038	3.76688e-07	2.57755e-05	ENST00000561606		5	NA		CTD-2256P15.2	antisense	10352701	10353601	54.16
ENSG00000280123	36.0819	18.864	3.73009	5.05724	4.2536e-07	2.9002e-05	ENST00000624338		8	NA		RP11-267M23.1	TEC	94427712	94429888	30.55
ENSG00000269148	21.3591	19.4949	3.85753	5.05374	4.33237e-07	2.94339e-05	ENST00000601618		19	NA		AC092301.3	antisense	45830164	45831108	52.7
ENSG00000270021	6.8556	20.4739	4.06075	5.04191	4.60912e-07	3.12031e-05	ENST00000602502		5	NA		CTC-203F4.2	antisense	135399280	135401296	53.5
ENSG00000260488	5.6072	20.4287	4.06076	5.03076	4.88549e-07	3.29572e-05	ENST00000570197		16	NA		RP11-166B2.7	antisense	11976851	11977850	58.4
ENSG00000266910	41.4593	17.9371	3.5763	5.01555	5.28819e-07	3.55482e-05	ENST00000587506		19	NA		CTC-448F2.6	processed_pseudogene	30037423	30038156	42.23
ENSG00000251455	6.63324	20.3127	4.06094	5.00197	5.67475e-07	3.80129e-05	ENST00000514269		4	NA		RP11-164P12.3	antisense	151674483	151677893	46.29
ENSG00000234135	4.40261	20.2395	4.06123	4.9836	6.24121e-07	4.16612e-05	ENST00000434984	RPL23AP83	X	NA		RPL23AP83	processed_pseudogene	56242937	56243409	48.41
ENSG00000223886	11.3607	20.2038	4.06101	4.97507	6.52238e-07	4.33863e-05	ENST00000493920		7	NA		RP11-251G23.2	processed_pseudogene	105530209	105530671	51.84
ENSG00000211898	48043.9	0.815967	0.164066	4.97341	6.57859e-07	4.36083e-05	ENST00000390556	IGHD	14	NA	uc032bnb.1	IGHD	IG_C_gene	105836765	105845678	59.36
ENSG00000115738	20.0878	20.1782	4.06074	4.96909	6.7269e-07	4.44371e-05	ENST00000234091	ID2	2	3398	uc002qza.3	ID2	protein_coding	8678845	8684453	49.26
ENSG00000253669	5.85282	20.1301	4.06119	4.9567	7.17e-07	4.72008e-05	ENST00000522715		8	NA		KB-1732A1.1	lincRNA	102805517	102809971	58.07
ENSG00000265206	5940.18	-0.928052	0.187264	-4.95585	7.20142e-07	4.72448e-05	ENST00000579003		17	NA		RP5-1171I10.5	antisense	58330884	58332508	63.57
ENSG00000264016	6.35484	20.1224	4.06119	4.95481	7.24004e-07	4.73355e-05	ENST00000579529		17	NA		CTC-297N7.9	lincRNA	10741267	10769016	48.12
ENSG00000144711	14706.2	-0.478559	0.0966649	-4.95071	7.39448e-07	4.81802e-05	ENST00000273221	IQSEC1	3	9922	uc003bxt.3	IQSEC1	protein_coding	12897220	13073117	54.36
ENSG00000255237	11.0408	20.0844	4.06118	4.94547	7.59621e-07	4.93263e-05	ENST00000525893		11	NA		RP13-317D12.3	antisense	462930	463899	49.38
ENSG00000145248	4.15711	20.0699	4.06135	4.94169	7.74493e-07	4.99924e-05	ENST00000273861	SLC10A4	4	201780	uc003gyc.2	SLC10A4	protein_coding	48483343	48489196	44.38
ENSG00000259004	77.4173	9.65525	1.9539	4.94153	7.75117e-07	4.99924e-05	ENST00000557121		14	101929422		RP11-8L8.2	lincRNA	101120856	101123542	56.35
ENSG00000260828	8.214	20.0639	4.06123	4.94035	7.79805e-07	5.01254e-05	ENST00000567416	HMGB3P32	16	NA		HMGB3P32	processed_pseudogene	57603137	57603697	45.45
ENSG00000271833	5.73121	20.0296	4.06133	4.93177	8.14879e-07	5.22042e-05	ENST00000607259		9	NA		RP11-356B19.11	sense_intronic	127366770	127367397	45.7
ENSG00000229832	7.61296	20.0149	4.06132	4.92818	8.29976e-07	5.29936e-05	ENST00000447949		1	NA		RP11-384C4.2	sense_intronic	212357418	212358353	46.9
ENSG00000197181	8.25479	19.9788	4.06128	4.91933	8.68405e-07	5.52624e-05	ENST00000356766	PIWIL2	8	55124	uc003xbn.2	PIWIL2	protein_coding	22275297	22357563	42.78
ENSG00000189269	5.3765	19.9655	4.06144	4.91587	8.83875e-07	5.606e-05	ENST00000614553	DRICH1	22	51233	uc002zxf.3	DRICH1	protein_coding	23608452	23632321	44.89
ENSG00000239605	7.13002	19.9405	4.06144	4.90971	9.12095e-07	5.76583e-05	ENST00000496939	C2orf61	2	285051		C2orf61	protein_coding	47045538	47155378	47.3
ENSG00000225490	20.9696	19.9363	4.06128	4.90888	9.16003e-07	5.77142e-05	ENST00000454331		20	NA		RP4-610C12.3	lincRNA	30286961	30288311	47.22
ENSG00000237126	10.5277	19.8977	4.06148	4.89914	9.62557e-07	6.0448e-05	ENST00000415506		2	NA		AC073254.1	antisense	232580948	232611971	49.25
ENSG00000180422	29.178	19.8682	4.06144	4.89192	9.98564e-07	6.25035e-05	ENST00000562248	LINC00304	16	283860		LINC00304	lincRNA	89159146	89164245	59.35
ENSG00000036448	88.6578	8.59968	1.76936	4.86032	1.17197e-06	7.3118e-05	ENST00000262113	MYOM2	8	9172	uc033azy.1	MYOM2	protein_coding	2045040	2165552	46.64
ENSG00000275476	7.33646	19.6046	4.06081	4.82775	1.38083e-06	8.58679e-05	ENST00000620496		12	NA		RP11-996F15.4	antisense	29277397	29277882	38.07
ENSG00000251451	13.3674	19.6031	4.06172	4.8263	1.39094e-06	8.62154e-05	ENST00000502460		7	NA		GS1-124K5.6	unprocessed_pseudogene	66407288	66409239	42.93
ENSG00000269892	12.4135	19.5798	4.06175	4.82053	1.43179e-06	8.84603e-05	ENST00000602431		12	NA		RP4-761J14.10	lincRNA	6742985	6743641	42.77
ENSG00000215244	13.3388	19.415	4.05995	4.78208	1.73492e-06	0.000106843	ENST00000399868		10	399715	uc021pms.1	RP11-563J2.2	lincRNA	6277687	6335982	43.91
ENSG00000077238	56510.5	0.947847	0.198895	4.76556	1.88327e-06	0.000115606	ENST00000566117	IL4R	16	3566		IL4R	protein_coding	27313668	27364778	49.92
ENSG00000273604	11.0263	19.3067	4.06265	4.75226	2.01156e-06	0.000123086	ENST00000621654	C17orf96	17	100170841	uc010wdq.2	C17orf96	protein_coding	38671703	38675421	63.89
ENSG00000213221	9.87036	19.2294	4.06288	4.73294	2.21294e-06	0.000134975	ENST00000371739	DNLZ	9	728489	uc004chf.2	DNLZ	protein_coding	136359480	136363789	64.59
ENSG00000272240	85.8262	8.74854	1.85363	4.71967	2.36228e-06	0.000143625	ENST00000606572		8	NA		RP5-855D21.1	antisense	234347	234887	43.81
ENSG00000124942	61328.6	-0.876003	0.187346	-4.67586	2.9273e-06	0.000177413	ENST00000530124	AHNAK	11	79026		AHNAK	protein_coding	62433542	62556235	50.05
ENSG00000121316	8.93777	18.9846	4.06348	4.67201	2.98271e-06	0.000180039	ENST00000240617	PLBD1	12	79887	uc001rcc.1	PLBD1	protein_coding	14503661	14568349	40.69
ENSG00000270419	40.6264	8.93468	1.91258	4.67154	2.98949e-06	0.000180039	ENST00000604200	CAHM	6	100526820	uc021zib.1	CAHM	lincRNA	163413065	163413960	60.94
ENSG00000242534	86.3099	5.6848	1.21753	4.66914	3.02468e-06	0.000181586	ENST00000453166	IGKV2D-28	2	NA		IGKV2D-28	IG_V_gene	89959979	89960754	43.43
ENSG00000169499	22450.7	0.593648	0.127239	4.66562	3.07683e-06	0.000184137	ENST00000521746	PLEKHA2	8	59339	uc033bis.1	PLEKHA2	protein_coding	38901235	38973909	46.54
ENSG00000178082	157.438	-6.08497	1.31383	-4.63148	3.63069e-06	0.000216605	ENST00000580812	TWF1P1	17	NA		TWF1P1	processed_pseudogene	29203426	29204474	39.47
ENSG00000076356	89.191	7.24053	1.56749	4.61918	3.85265e-06	0.000229131	ENST00000367033	PLXNA2	1	5362	uc001hgz.3	PLXNA2	protein_coding	208022242	208244320	47.98
ENSG00000197249	116.493	8.85814	1.9341	4.57998	4.65013e-06	0.000275701	ENST00000440909	SERPINA1	14	5265	uc001ycz.4	SERPINA1	protein_coding	94376747	94390693	51.8
ENSG00000144214	127.592	8.94205	1.96812	4.54345	5.53411e-06	0.000327095	ENST00000308528	LYG1	2	129530	uc002szy.3	LYG1	protein_coding	99284238	99304742	43.24
ENSG00000196235	9235.93	-0.400539	0.0894905	-4.47577	7.6138e-06	0.000448627	ENST00000594990	SUPT5H	19	6829		SUPT5H	protein_coding	39436156	39476670	51.42
ENSG00000158683	95.0165	8.17378	1.83015	4.46618	7.96272e-06	0.000467743	ENST00000289672	PKD1L1	7	168507	uc003tny.2	PKD1L1	protein_coding	47774652	47948491	44.25
ENSG00000244556	17.8879	18.1605	4.06697	4.46537	7.99312e-06	0.000468088	ENST00000459650	ODCP	7	NA		ODCP	processed_pseudogene	129028889	129030527	43.93
ENSG00000007038	99.6232	9.00381	2.01844	4.46078	8.16612e-06	0.000476756	ENST00000450020	PRSS21	16	10942	uc002crr.4	PRSS21	protein_coding	2817180	2826304	55.65
ENSG00000196405	18719.8	0.484791	0.10872	4.45909	8.23076e-06	0.000479065	ENST00000402714	EVL	14	51466	uc001ygt.3	EVL	protein_coding	99971449	100144236	45.48
ENSG00000150093	6467.41	-1.33642	0.302852	-4.41276	1.02061e-05	0.000592234	ENST00000302278	ITGB1	10	3688	uc001iwt.4	ITGB1	protein_coding	32900319	33005792	39.15
ENSG00000147535	15707	0.775059	0.175796	4.40885	1.03921e-05	0.000601196	ENST00000529359	PPAPDC1B	8	84513	uc003xle.4	PPAPDC1B	protein_coding	38263130	38269243	45.35
ENSG00000158301	52.7012	13.2719	3.02895	4.3817	1.17755e-05	0.000679174	ENST00000332262	GPRASP2	X	114928	uc004ejm.3	GPRASP2	protein_coding	102712176	102717733	51.49
ENSG00000131844	2207.44	-1.06372	0.245241	-4.33743	1.44157e-05	0.000828949	ENST00000512218	MCCC2	5	64087	uc003kbs.4	MCCC2	protein_coding	71587288	71658704	41.2
ENSG00000254286	7.01708	17.6108	4.07101	4.32589	1.51918e-05	0.000870949	ENST00000519880		8	NA		RP11-89K10.1	antisense	126557875	126713415	41.29
ENSG00000205517	74.5469	-10.1076	2.34873	-4.30344	1.68165e-05	0.000961208	ENST00000562663	RGL3	19	57139	uc002mrp.2	RGL3	protein_coding	11384341	11419342	50.52
ENSG00000196924	47853.8	-0.439581	0.102625	-4.28337	1.84081e-05	0.00104904	ENST00000420627	FLNA	X	2316	uc004fkk.2	FLNA	protein_coding	154348524	154374638	62.28
ENSG00000271741	10.2646	17.4141	4.07262	4.27589	1.90371e-05	0.00108166	ENST00000487874		1	NA	uc001byf.1	RP11-244H3.4	protein_coding	34981533	35031741	39.8
ENSG00000106537	5965.45	0.88051	0.206363	4.2668	1.98299e-05	0.00112336	ENST00000262067	TSPAN13	7	27075	uc003stq.3	TSPAN13	protein_coding	16753535	16784536	39.23
ENSG00000264024	32.3949	-4.46577	1.05637	-4.22745	2.36353e-05	0.00133497	ENST00000581070		14	NA		AL901608.1	miRNA	105711923	105711992	70
ENSG00000270641	7.83851	-17.2507	4.12123	-4.18581	2.8415e-05	0.00160021	ENST00000604411	TSIX	X	9383	uc004ebn.2	TSIX	lincRNA	73792205	73829231	40.64
ENSG00000133056	8871.58	0.882096	0.211095	4.17867	2.93219e-05	0.00164643	ENST00000367187	PIK3C2B	1	5287	uc001haw.3	PIK3C2B	protein_coding	204422628	204494724	49.35
ENSG00000227288	187.088	5.43095	1.3052	4.161	3.16858e-05	0.00177394	ENST00000448213		1	NA		RP5-837I24.1	processed_pseudogene	81501794	81503468	57.73
ENSG00000143476	6.55269	14.8184	3.57178	4.14875	3.34295e-05	0.00186609	ENST00000366991	DTL	1	51514	uc009xdc.4	DTL	protein_coding	212035553	212107400	38.44
ENSG00000151651	7578.32	-0.680958	0.164966	-4.12787	3.66131e-05	0.00203785	ENST00000445355	ADAM8	10	101	uc021qbe.1	ADAM8	protein_coding	133262403	133276868	63.75
ENSG00000214198	39.5487	8.42919	2.05569	4.10042	4.12401e-05	0.00228871	ENST00000548527		12	NA		RP11-642P15.1	unitary_pseudogene	103843749	103930211	42.57
ENSG00000165119	20121.7	0.41713	0.101768	4.09885	4.15212e-05	0.00229763	ENST00000376281	HNRNPK	9	3190	uc004anl.4	HNRNPK	protein_coding	83968083	83980616	39.12
ENSG00000097096	6.56653	-16.8062	4.12273	-4.07649	4.57215e-05	0.00252274	ENST00000341460	SYDE2	1	84144	uc009wcm.3	SYDE2	protein_coding	85156873	85201046	36.31
ENSG00000112182	10366.5	0.629661	0.154548	4.07422	4.61678e-05	0.00254003	ENST00000257749	BACH2	6	60468	uc011eab.2	BACH2	protein_coding	89926529	90296908	40.5
ENSG00000232788	39.4402	8.66769	2.12801	4.07314	4.63837e-05	0.00254457	ENST00000458314		2	NA		AC078883.3	antisense	172464262	172466022	42.19
ENSG00000279281	13.6554	14.8715	3.66692	4.05558	5.00102e-05	0.00273566	ENST00000623054		17	NA		RP11-226M10.3	TEC	57448218	57450291	45.42
ENSG00000118939	72.5672	8.47327	2.09196	4.0504	5.11301e-05	0.00278893	ENST00000471792	UCHL3	13	7347		UCHL3	protein_coding	75549480	75606020	35.78
ENSG00000253239	98.3426	8.03799	1.99424	4.03061	5.56313e-05	0.0030258	ENST00000523272	IGLVI-70	22	NA	uc002zvv.3	IGLVI-70	IG_V_pseudogene	22026076	22026593	54.25
ENSG00000154263	50.0801	-10.3622	2.59186	-3.99798	6.38858e-05	0.0034649	ENST00000522787	ABCA10	17	10349		ABCA10	protein_coding	69147214	69244846	36.13
ENSG00000270987	76.1858	9.05944	2.27133	3.9886	6.6464e-05	0.00359452	ENST00000604292		6	NA		RP3-467N11.2	processed_pseudogene	100889603	100890338	55.3
ENSG00000260936	13.4005	16.2865	4.08881	3.9832	6.79939e-05	0.00366687	ENST00000563011	FTO-IT1	16	NA	uc032eac.1	FTO-IT1	sense_intronic	54039393	54040726	38.91
ENSG00000242580	75.6507	9.05247	2.27399	3.98087	6.86621e-05	0.00369247	ENST00000468879	IGKV1D-43	2	NA		IGKV1D-43	IG_V_gene	90209873	90210529	51.45
ENSG00000187116	7.0401	-16.4072	4.12273	-3.97969	6.90053e-05	0.00370051	ENST00000432233	LILRA5	19	353514	uc032idp.1	LILRA5	protein_coding	54307070	54313139	50.54
ENSG00000117586	86.5539	7.883	1.98421	3.97286	7.10144e-05	0.00379758	ENST00000367718	TNFSF4	1	7292	uc001giv.3	TNFSF4	protein_coding	173183734	173207313	39.89
ENSG00000164099	40.2703	13.3434	3.36511	3.96522	7.33281e-05	0.00391036	ENST00000296498	PRSS12	4	8492	uc003ica.2	PRSS12	protein_coding	118280038	118353003	36.51
ENSG00000268154	73.9761	8.16669	2.08034	3.92566	8.64914e-05	0.00459946	ENST00000600454		1	NA		Metazoa_SRP	misc_RNA	154950210	154950492	55.48
ENSG00000165055	1010.05	-1.40791	0.358926	-3.92255	8.76161e-05	0.00464633	ENST00000482555	METTL2B	7	55798		METTL2B	protein_coding	128476729	128506602	45.29
ENSG00000103811	7679.01	-0.677469	0.173993	-3.89365	9.87469e-05	0.00521621	ENST00000220166	CTSH	15	1512	uc021srk.1	CTSH	protein_coding	78921058	78949574	52.42
ENSG00000058668	1033.65	-1.35122	0.347066	-3.89325	9.89089e-05	0.00521621	ENST00000357681	ATP2B4	1	493	uc001gzw.3	ATP2B4	protein_coding	203626561	203744081	46.5
ENSG00000279330	56.2304	8.89364	2.28924	3.88497	0.000102342	0.00538241	ENST00000622989		16	NA		AJ003147.11	TEC	3273609	3275807	44.79
ENSG00000250492	35.6157	7.93542	2.04798	3.87476	0.000106731	0.00559779	ENST00000504674	INTS6P1	5	NA		INTS6P1	processed_pseudogene	39718984	39721513	41.3
ENSG00000234618	31.7998	5.62675	1.45257	3.87366	0.000107214	0.00560775	ENST00000418207	RPSAP9	9	NA		RPSAP9	processed_pseudogene	76398699	76399586	51.46
ENSG00000255318	40.6934	13.1059	3.38883	3.86739	0.000110008	0.00573814	ENST00000533311		11	NA		RP11-655M14.13	lincRNA	67618279	67627304	50.34
ENSG00000103522	1718.13	1.39571	0.361218	3.86389	0.000111593	0.00580499	ENST00000337929	IL21R	16	50615	uc002doq.2	IL21R	protein_coding	27402162	27452042	47.11
ENSG00000158714	8.14515	-15.8953	4.12273	-3.85554	0.000115477	0.00599066	ENST00000289707	SLAMF8	1	56833	uc001fue.4	SLAMF8	protein_coding	159826750	159837249	49.75
ENSG00000259793	8.22403	-15.8598	4.12273	-3.84691	0.000119616	0.0061886	ENST00000563747		2	NA		RP11-400N9.1	antisense	233351132	233353416	51.6
ENSG00000183918	7.41293	-15.8421	4.12273	-3.84263	0.000121723	0.00627881	ENST00000371139	SH2D1A	X	4068	uc004euf.5	SH2D1A	protein_coding	124346344	124373155	35.67
ENSG00000273507	7.17448	-15.8393	4.12273	-3.84195	0.000122062	0.00627881	ENST00000618106		13	NA		RP11-50D16.4	lincRNA	39053072	39221927	38.41
ENSG00000259856	89.4401	7.84345	2.04183	3.84138	0.000122346	0.00627881	ENST00000561790	RAB43P1	16	NA		RAB43P1	processed_pseudogene	46626404	46626992	61.29
ENSG00000118407	8.64611	-15.8275	4.12273	-3.83907	0.0001235	0.00632101	ENST00000393004	FILIP1	6	27145	uc003phy.1	FILIP1	protein_coding	75291859	75493738	37.96
ENSG00000113263	8.51792	-15.7711	4.12273	-3.82539	0.000130564	0.00666472	ENST00000521769	ITK	5	3702		ITK	protein_coding	157142933	157255191	41.46
ENSG00000130508	64.9355	8.92377	2.33884	3.81546	0.000135929	0.00692008	ENST00000252804	PXDN	2	7837	uc002qxa.3	PXDN	protein_coding	1631887	1744852	49.9
ENSG00000260018	21.6291	13.3727	3.50696	3.8132	0.000137178	0.00696506	ENST00000565382		16	NA		RP11-505K9.1	antisense	84117051	84117571	65.64
ENSG00000279406	8.67262	-15.6454	4.12273	-3.79492	0.000147693	0.00747905	ENST00000623796		10	NA		RP11-327E2.5	TEC	71364243	71366374	49.39
ENSG00000140853	15558	-0.677673	0.17877	-3.79074	0.000150199	0.00758582	ENST00000539881	NLRC5	16	84166		NLRC5	protein_coding	56989485	57083531	49.44
ENSG00000163399	5369.07	-0.912203	0.240824	-3.78784	0.000151966	0.00765482	ENST00000418797	ATP1A1	1	476		ATP1A1	protein_coding	116372668	116410261	44.46
ENSG00000136938	6472.61	-0.498989	0.132202	-3.77443	0.000160374	0.00805708	ENST00000339399	ANP32B	9	10541	uc004aya.3	ANP32B	protein_coding	97983361	98015943	43.52
ENSG00000136193	3859.82	-0.920125	0.244344	-3.7657	0.000166084	0.00832206	ENST00000242059	SCRN1	7	9805	uc003tak.3	SCRN1	protein_coding	29920103	29990289	43.91
ENSG00000104921	16349.7	0.653453	0.173864	3.75841	0.000170999	0.00854593	ENST00000597312	FCER2	19	2208		FCER2	protein_coding	7688758	7702146	53.51
ENSG00000073711	84.4132	9.19092	2.4784	3.70841	0.000208565	0.0103961	ENST00000264977	PPP2R3A	3	5523	uc003eqv.2	PPP2R3A	protein_coding	135965673	136147891	39.07
ENSG00000143318	29.265	-10.0302	2.70528	-3.70762	0.000209214	0.0104013	ENST00000368078	CASQ1	1	844	uc010pja.2	CASQ1	protein_coding	160190556	160201886	50.52
ENSG00000242660	18.1353	8.2798	2.2454	3.68744	0.000226518	0.0112323	ENST00000495111		17	NA		RP11-1094M14.1	processed_pseudogene	35566517	35566672	39.1
ENSG00000275106	90.6145	8.59508	2.33322	3.68379	0.000229791	0.0113651	ENST00000613068		7	NA		RP11-309L24.10	lincRNA	128952527	128953316	40.38
ENSG00000182687	75.9948	9.19944	2.49878	3.68157	0.000231803	0.011435	ENST00000329003	GALR2	17	8811	uc002jqm.2	GALR2	protein_coding	76074794	76077541	64.59
ENSG00000163697	333.65	3.76361	1.0255	3.67001	0.000242543	0.011934	ENST00000295974	APBB2	4	323	uc003gvn.3	APBB2	protein_coding	40810027	41216714	42.41
ENSG00000151458	70.3752	8.38416	2.29136	3.65904	0.000253161	0.0124244	ENST00000504087	ANKRD50	4	57182	uc010inw.3	ANKRD50	protein_coding	124664052	124712732	35.15
ENSG00000187210	2197.31	1.25872	0.34407	3.65832	0.000253879	0.0124277	ENST00000488136	GCNT1	9	2650		GCNT1	protein_coding	76419850	76507416	42.83
ENSG00000270956	54.8938	8.86471	2.42538	3.65498	0.000257206	0.0125584	ENST00000604692		2	NA		RP11-65L3.4	antisense	178541125	178541799	36.15
ENSG00000149489	172.949	-5.07629	1.3904	-3.65095	0.000261267	0.0127241	ENST00000525801	ROM1	11	6094		ROM1	protein_coding	62611722	62615120	63.4
ENSG00000231329	63.5694	7.13136	1.96402	3.631	0.000282323	0.0137146	ENST00000589192		6	NA		RP1-225E12.2	antisense	139144204	139239653	40.62
ENSG00000139921	1655.74	0.75094	0.207016	3.62745	0.00028623	0.0138691	ENST00000555574	TMX1	14	81542		TMX1	protein_coding	51240162	51257546	36.96
ENSG00000181074	53.2003	9.06456	2.50076	3.62472	0.000289277	0.0139812	ENST00000317254	OR52N4	11	390072	uc001mbu.3	OR52N4	protein_coding	5754693	5755729	46.09
ENSG00000136250	55.781	7.33767	2.02604	3.62168	0.000292692	0.0141106	ENST00000617537	AOAH	7	313	uc032zjw.1	AOAH	protein_coding	36512949	36724549	41.56
ENSG00000126759	65.9431	8.76415	2.45173	3.57468	0.000350651	0.0168622	ENST00000478222	CFP	X	5199		CFP	protein_coding	47624213	47630305	55.47
ENSG00000153558	41.1471	8.56248	2.39729	3.57173	0.000354635	0.0170109	ENST00000498807	FBXL2	3	25827		FBXL2	protein_coding	33277025	33403662	38.73
ENSG00000258199	39.3742	7.97656	2.23686	3.56596	0.000362529	0.017346	ENST00000553176		12	NA		RP11-977G19.5	sense_overlapping	56162359	56190284	49.39
ENSG00000105612	874.642	-1.21289	0.341075	-3.55609	0.000376413	0.0179653	ENST00000222219	DNASE2	19	1777	uc002mvn.1	DNASE2	protein_coding	12875211	12881468	52.62
ENSG00000242622	49.3672	-9.48765	2.67034	-3.55297	0.000380901	0.0181341	ENST00000484076		3	NA	uc003edp.3	RP11-18H7.1	lincRNA	120094895	120136783	41.62
ENSG00000235750	13480.5	0.497158	0.139967	3.55197	0.000382353	0.018158	ENST00000423313	KIAA0040	1	9674	uc009wws.2	KIAA0040	protein_coding	175156987	175192999	44.88
ENSG00000182397	30.0311	8.27516	2.33125	3.54967	0.000385708	0.0182719	ENST00000341853	DNM1P46	15	196968	uc032csc.1	DNM1P46	transcribed_unprocessed_pseudogene	99790156	99806927	49.14
ENSG00000184588	8126.78	0.647748	0.182875	3.54204	0.000397052	0.0187627	ENST00000329654	PDE4B	1	5142	uc001dcn.3	PDE4B	protein_coding	65792514	66374579	37.45
ENSG00000131379	20.6455	7.47759	2.12266	3.52274	0.000427106	0.020133	ENST00000253697	C3orf20	3	84077	uc003byy.3	C3orf20	protein_coding	14675099	14773034	44.01
ENSG00000095587	39.0617	7.43506	2.1135	3.5179	0.000434984	0.0204539	ENST00000357947	TLL2	10	7093	uc001kml.2	TLL2	protein_coding	96364606	96513918	46.43
ENSG00000115107	53.6132	-7.99548	2.27347	-3.51686	0.000436688	0.0204835	ENST00000393110	STEAP3	2	55240	uc002tlq.3	STEAP3	protein_coding	119223831	119265652	51.67
ENSG00000167107	1962.63	-1.22115	0.348669	-3.50233	0.000461206	0.0215806	ENST00000510410	ACSF2	17	80221		ACSF2	protein_coding	50426158	50474845	49.96
ENSG00000116679	3712.26	-0.701825	0.200429	-3.50161	0.00046245	0.0215859	ENST00000480769	IVNS1ABP	1	10625		IVNS1ABP	protein_coding	185296388	185317329	37.35
ENSG00000197226	7102.77	-0.572636	0.16364	-3.49937	0.000466366	0.0217156	ENST00000518085	TBC1D9B	5	23061		TBC1D9B	protein_coding	179862066	179907859	54.22
ENSG00000100968	260.765	4.49414	1.28636	3.49369	0.000476399	0.0221288	ENST00000440487	NFATC4	14	4776		NFATC4	protein_coding	24365673	24379604	56.84
ENSG00000161929	6674.91	-0.923443	0.264636	-3.48948	0.000483953	0.0224251	ENST00000574081	SCIMP	17	388325	uc002gbh.3	SCIMP	protein_coding	5208961	5234860	48.5
ENSG00000167553	234.848	4.10676	1.17781	3.48676	0.000488904	0.0225997	ENST00000549554	TUBA1C	12	84790		TUBA1C	protein_coding	49188736	49274603	45.2
ENSG00000138722	70.1636	9.48188	2.72858	3.47502	0.000510806	0.0235551	ENST00000394980	MMRN1	4	22915	uc003hst.3	MMRN1	protein_coding	89879532	89954629	33.75
ENSG00000138115	58.0616	8.61067	2.47855	3.47407	0.000512619	0.0235817	ENST00000527420	CYP2C8	10	1558	uc001kkb.3	CYP2C8	protein_coding	95036772	95069497	37.59
ENSG00000137312	2699.76	-0.977027	0.281631	-3.46918	0.000522049	0.0239578	ENST00000487376	FLOT1	6	10211		FLOT1	protein_coding	30727709	30742733	49.72
ENSG00000083223	3022.23	-0.498616	0.143765	-3.46828	0.000523808	0.0239809	ENST00000277141	ZCCHC6	9	79670	uc004aoq.3	ZCCHC6	protein_coding	86287733	86354454	37.99
ENSG00000196141	49.278	8.7249	2.51615	3.46756	0.000525211	0.0239876	ENST00000439084	SPATS2L	2	26010		SPATS2L	protein_coding	200305881	200482263	40.19
ENSG00000135945	2033.68	-0.941163	0.271629	-3.46488	0.000530468	0.0241698	ENST00000393445	REV1	2	51455	uc002tac.3	REV1	protein_coding	99400475	99490035	39.33
ENSG00000254470	1899.19	-1.04637	0.302184	-3.46268	0.000534818	0.02431	ENST00000532090	AP5B1	11	91056	uc031qbm.1	AP5B1	protein_coding	65775893	65780802	62.81
ENSG00000167123	32.506	7.46324	2.15644	3.46091	0.000538352	0.0244125	ENST00000420034	CERCAM	9	51148		CERCAM	protein_coding	128411751	128437351	55.11
ENSG00000134250	12115.4	-0.567789	0.164719	-3.44703	0.000566793	0.0256413	ENST00000256646	NOTCH2	1	4853	uc001eik.3	NOTCH2	protein_coding	119911553	120069626	39.74
ENSG00000135144	3246.45	1.10341	0.320304	3.4449	0.000571277	0.0257831	ENST00000548759	DTX1	12	1840		DTX1	protein_coding	113056709	113098028	53.96
ENSG00000152558	10411.9	0.497479	0.144501	3.44274	0.000575844	0.0259279	ENST00000361236	TMEM123	11	114908	uc009yxc.3	TMEM123	protein_coding	102396332	102470384	40.62
ENSG00000161249	34.9953	7.45058	2.16639	3.43916	0.000583515	0.0262115	ENST00000472365	DMKN	19	93099		DMKN	protein_coding	35497220	35513658	54.04
ENSG00000179981	1149.34	-1.29912	0.37855	-3.43183	0.000599517	0.0268671	ENST00000322038	TSHZ1	18	10194	uc002lly.4	TSHZ1	protein_coding	75210755	75289950	44.58
ENSG00000254709	4397.58	1.05841	0.308628	3.42939	0.000604944	0.0270468	ENST00000526893	IGLL5	22	100423062	uc011aiw.2	IGLL5	protein_coding	22734620	22896107	45.55
ENSG00000183171	21.8964	8.21485	2.39642	3.42797	0.000608112	0.0271249	ENST00000332359		X	NA		RP11-49C9.2	processed_pseudogene	150114378	150116520	39.66
ENSG00000186369	54.1649	9.15337	2.67667	3.41969	0.000626917	0.0278985	ENST00000553426	LINC00643	14	NA		LINC00643	lincRNA	62114353	62130962	38.36
ENSG00000095637	60.6882	6.56837	1.92559	3.41109	0.000647037	0.0287269	ENST00000371227	SORBS1	10	10580	uc001kkw.3	SORBS1	protein_coding	95311771	95561414	44.47
ENSG00000206535	46.7138	9.30179	2.7366	3.39903	0.000676248	0.0299154	ENST00000383693	LNP1	3	348801	uc003dtx.4	LNP1	protein_coding	100401193	100456319	39.31
ENSG00000143344	47.843	-9.33209	2.74574	-3.39875	0.00067694	0.0299154	ENST00000304685	RGL1	1	23179	uc001gqm.3	RGL1	protein_coding	183636085	183928531	39.98
ENSG00000240505	3138.33	-1.40659	0.414298	-3.39511	0.000686017	0.0302466	ENST00000584950	TNFRSF13B	17	23495		TNFRSF13B	protein_coding	16929816	16972118	48.46
ENSG00000034510	37156.9	0.396903	0.117089	3.38975	0.00069956	0.0307726	ENST00000233143	TMSB10	2	9168	uc002sow.1	TMSB10	protein_coding	84905625	84906675	63.37
ENSG00000243244	144.396	5.98024	1.77109	3.37659	0.000733893	0.0322086	ENST00000484110	STON1	2	11037		STON1	protein_coding	48529383	48598513	45.18
ENSG00000259137	18.7171	4.56625	1.35329	3.37419	0.000740343	0.0324172	ENST00000555080		14	NA		RP11-305B6.1	processed_pseudogene	44120210	44120761	41.49
ENSG00000136231	80.3813	7.93266	2.35348	3.37061	0.00075001	0.0327653	ENST00000258729	IGF2BP3	7	10643	uc003swg.3	IGF2BP3	protein_coding	23310209	23470467	41.63
ENSG00000182871	1486.96	-2.53772	0.753472	-3.36804	0.000757059	0.0329978	ENST00000400337	COL18A1	21	80781	uc032qce.1	COL18A1	protein_coding	45405137	45513720	59.66
ENSG00000141497	36.7157	8.77014	2.60518	3.36643	0.000761479	0.0331148	ENST00000433935	ZMYND15	17	84225	uc002fyv.3	ZMYND15	protein_coding	4740015	4746119	58.53
ENSG00000140332	5089.27	-0.861954	0.2563	-3.36307	0.000770807	0.0334443	ENST00000558939	TLE3	15	7090	uc002asm.3	TLE3	protein_coding	70047790	70098176	52.15
ENSG00000266980	62.9857	6.04473	1.79857	3.36084	0.000777049	0.0336386	ENST00000586808		17	NA		RP11-552F3.4	antisense	75818815	75820055	57.7
ENSG00000207833	17.3239	5.39611	1.60699	3.3579	0.000785369	0.0339219	ENST00000385098		22	NA		AC244157.1	miRNA	22792488	22792582	65.26
ENSG00000268093	34.4848	7.97328	2.37526	3.35679	0.000788516	0.0339809	ENST00000600303		19	NA		AC022154.7	antisense	48619272	48624132	50.5
ENSG00000177311	2206.69	-1.2412	0.370074	-3.35392	0.000796757	0.0342588	ENST00000509842	ZBTB38	3	253461	uc003etw.3	ZBTB38	protein_coding	141324213	141449792	42.29
ENSG00000110665	3847.12	0.910018	0.272658	3.33758	0.000845106	0.036256	ENST00000381153	C11orf21	11	29125	uc001lvv.2	C11orf21	protein_coding	2295645	2303049	60.61
ENSG00000089163	37.2209	7.50038	2.24915	3.33476	0.000853727	0.036518	ENST00000536460	SIRT4	12	23409		SIRT4	protein_coding	120302316	120313249	48.77
ENSG00000118997	17.8704	5.50065	1.6497	3.33433	0.00085504	0.036518	ENST00000409063	DNAH7	2	56171	uc002uti.4	DNAH7	protein_coding	195737703	196068812	37.1
ENSG00000276966	43.8156	9.43361	2.8333	3.32955	0.000869869	0.0370685	ENST00000615164	HIST1H4E	6	8367	uc003ngy.3	HIST1H4E	protein_coding	26204645	26204956	57.05
ENSG00000113721	24.1483	7.12405	2.14066	3.32797	0.000874821	0.0371965	ENST00000261799	PDGFRB	5	5159	uc003lro.3	PDGFRB	protein_coding	150113837	150155872	54.34
ENSG00000004468	2549.22	0.976717	0.293978	3.32241	0.000892431	0.0378609	ENST00000502843	CD38	4	952	uc003gol.1	CD38	protein_coding	15778275	15853230	41.09
ENSG00000268070	23.25	-13.6859	4.12273	-3.31963	0.000901359	0.0380906	ENST00000601729		19	NA		AC006539.3	processed_pseudogene	20033444	20034332	46.79
ENSG00000255310	830.22	-1.19994	0.361484	-3.31949	0.000901835	0.0380906	ENST00000530248		8	NA		AF131215.2	sense_intronic	11107788	11109726	42.08
ENSG00000169696	1962.97	0.648235	0.19546	3.31647	0.000911639	0.0384197	ENST00000581484	ASPSCR1	17	79058		ASPSCR1	protein_coding	81976807	82017406	60.76
ENSG00000280387	33.31	8.13267	2.45675	3.31033	0.000931845	0.0391847	ENST00000623967		20	NA		RP5-1153D9.5	TEC	56522252	56523499	49.36
ENSG00000124772	11135.3	-0.534584	0.16164	-3.30725	0.000942156	0.0394836	ENST00000459703	CPNE5	6	57699		CPNE5	protein_coding	36740775	36840002	51.81
ENSG00000166974	4365.02	0.617355	0.186683	3.30698	0.000943089	0.0394836	ENST00000591734	MAPRE2	18	10982	uc010xcb.3	MAPRE2	protein_coding	34976928	35143470	39.48
ENSG00000184719	173.974	4.81547	1.45818	3.30239	0.00095864	0.0400468	ENST00000371947	RNLS	10	55328	uc001kfd.2	RNLS	protein_coding	88273864	88584530	36.76
ENSG00000185527	68.5758	8.42118	2.55885	3.291	0.000998326	0.0416136	ENST00000574024	PDE6G	17	5148		PDE6G	protein_coding	81650459	81663112	55.06
ENSG00000222038	22.1715	6.10943	1.85778	3.28856	0.00100701	0.041884	ENST00000409602	POTEJ	2	653781	uc021vor.2	POTEJ	protein_coding	130611481	130658091	37.56
ENSG00000116678	62.7313	8.22381	2.50139	3.2877	0.00101009	0.0419209	ENST00000371059	LEPR	1	3953	uc001dcg.3	LEPR	protein_coding	65420652	65641559	37.78
ENSG00000223946	43.4394	8.03524	2.45133	3.27791	0.0010458	0.0433089	ENST00000412701		6	NA		RP11-533O20.2	lincRNA	42030053	42031382	57.89
ENSG00000137310	905.2	-1.20212	0.367517	-3.27093	0.00107196	0.044296	ENST00000376257	TCF19	6	6941	uc003nst.3	TCF19	protein_coding	31158542	31167159	51.1
ENSG00000147162	27670.4	-0.419506	0.128279	-3.27027	0.00107443	0.0443023	ENST00000373719	OGT	X	8473	uc004eaa.2	OGT	protein_coding	71533083	71575897	40.6
ENSG00000099800	1027.12	-1.25864	0.385058	-3.2687	0.00108041	0.0444528	ENST00000215570	TIMM13	19	26517	uc002lvx.2	TIMM13	protein_coding	2425624	2427894	64.99
ENSG00000162909	5195.96	-0.747964	0.228907	-3.26755	0.00108484	0.0445392	ENST00000434648	CAPN2	1	824		CAPN2	protein_coding	223701593	223776018	48.73
ENSG00000143013	1838.02	-0.825008	0.252794	-3.26356	0.00110021	0.0450731	ENST00000370544	LMO4	1	8543	uc001dmi.4	LMO4	protein_coding	87328468	87348923	42.55
ENSG00000147905	5138.39	0.592184	0.181751	3.25822	0.00112113	0.0458321	ENST00000336755	ZCCHC7	9	84186	uc003zzq.3	ZCCHC7	protein_coding	37120539	37358149	36.62
ENSG00000235354	6.92316	5.00751	1.53985	3.25195	0.00114616	0.0467548	ENST00000452798		7	NA		CTA-276O3.4	processed_pseudogene	103348601	103348771	50.29
ENSG00000221823	1963.54	0.860744	0.265167	3.24604	0.00117022	0.0474882	ENST00000234310	PPP3R1	2	5534	uc002sei.1	PPP3R1	protein_coding	68178857	68256237	37.41
ENSG00000068001	42.3069	-9.2593	2.85252	-3.24601	0.00117033	0.0474882	ENST00000447092	HYAL2	3	8692	uc003czx.3	HYAL2	protein_coding	50317790	50322906	61.05
ENSG00000279058	25.3922	6.67878	2.05773	3.24571	0.0011716	0.0474882	ENST00000624701		10	NA		AC244230.1	protein_coding	46337224	46358714	40.5
ENSG00000258443	6.88778	13.3714	4.12273	3.24334	0.00118138	0.0476872	ENST00000553394		14	NA		RP3-414A15.11	sense_intronic	73517233	73520648	47.07
ENSG00000109917	2619.28	-0.679058	0.209428	-3.24244	0.0011851	0.0476872	ENST00000227322	ZPR1	11	8882	uc001ppp.3	ZPR1	protein_coding	116773799	116788050	44.53
ENSG00000234062	91.5857	5.81316	1.79283	3.24244	0.00118511	0.0476872	ENST00000424306		X	NA	uc004fai.1	RP11-308D16.2	transcribed_unprocessed_pseudogene	136909395	137021630	42.06
ENSG00000197594	7.70169	13.3663	4.12273	3.24211	0.0011865	0.0476872	ENST00000486853	ENPP1	6	5167		ENPP1	protein_coding	131808016	131895155	38.19
ENSG00000278987	75.4604	8.02272	2.4756	3.24071	0.00119232	0.0478206	ENST00000624137		16	NA		LA16c-431H6.7	TEC	1688355	1690536	45
ENSG00000161509	33.6878	7.89852	2.4406	3.23631	0.00121086	0.048396	ENST00000293190	GRIN2C	17	2905	uc002jlt.2	GRIN2C	protein_coding	74842023	74861504	59.83
ENSG00000185774	24.294	-8.58423	2.65264	-3.2361	0.00121174	0.048396	ENST00000382148	KCNIP4	4	80333	uc003gqh.1	KCNIP4	protein_coding	20728616	21948799	37.71
ENSG00000110077	99.9274	8.66863	2.6815	3.23276	0.00122601	0.048864	ENST00000528851	MS4A6A	11	64231	uc001not.3	MS4A6A	protein_coding	60172014	60184666	40.17
ENSG00000196352	5276.14	0.535692	0.165791	3.23112	0.00123306	0.0489674	ENST00000367064	CD55	1	1604	uc001hfq.4	CD55	protein_coding	207321508	207360966	36.33
ENSG00000087266	10785.7	0.618308	0.191396	3.23052	0.00123564	0.0489674	ENST00000452765	SH3BP2	4	6452	uc003gfi.4	SH3BP2	protein_coding	2793023	2841098	59.23
ENSG00000116824	5.36648	13.3175	4.12273	3.23025	0.0012368	0.0489674	ENST00000369478	CD2	1	914	uc001egu.4	CD2	protein_coding	116754385	116769228	47.15
ENSG00000132294	3118.15	-0.775428	0.240087	-3.22978	0.00123887	0.0489674	ENST00000254624	EFR3A	8	23167	uc003yte.3	EFR3A	protein_coding	131904088	132013642	35.32
ENSG00000112137	2913.7	0.911345	0.282645	3.22435	0.0012626	0.0498023	ENST00000332995	PHACTR1	6	221692	uc010jpc.3	PHACTR1	protein_coding	12716805	13290484	41.2
ENSG00000121966	68821.4	0.700147	0.217192	3.22363	0.00126577	0.0498243	ENST00000409817	CXCR4	2	7852	uc002tuy.3	CXCR4	protein_coding	136114349	136118165	52.06
